# Supplementary material for: A Complete Analysis of HA and NA Genes of Influenza A Viruses
Source: PLoS One. 2010 Dec 29;5(12):e14454. doi: 10.1371/journal.pone.0014454 (PMC3012125; doi:10.1371/journal.pone.0014454)
Supplement: Table S1 — The HA subgroups identified in this analysis. This table includes all HA subgroups identified in this analysis. (3.58 MB XLS) [file pone.0014454.s001.xls]

## Sheet: H1
H1g1.1.1	DQ508905	Wilson-Smith/1933	Human	H1	N1	UnitedKingdom	Europe	1933
H1g1.1.1	CY010788	WSN/1933TS61	Human	H1	N1	UnitedKingdom	Europe	1933
H1g1.1.1	J02176	WSN/33	Human	H1	N1	UnitedKingdom	Europe	1933
H1g1.1.1	CY034132	WSN/1933	Human	H1	N1	UnitedKingdom	Europe	1933
H1g1.1.2	U38242	Tokyo/3/1967	Human	H1	N0	Japan	Asia	1967
H1g1.1.2	D00837	swine/Cambridge/1939	Swine	H1	N1	UnitedKingdom	Europe	1939
H1g1.1.2	U04859	swine/Cambridge/39	Swine	H1	N1	UnitedKingdom	Europe	1939
H1g1.1.2	D00840	swine/NI/1938	Swine	H1	N0	Ireland	Europe	1938
H1g1.1.2	U04858	swine/NorthernIreland/38	Swine	H1	N1	Ireland	Europe	1938
H1g1.1.2	CY009604	Wilson-Smith/33	Human	H1	N1	UnitedKingdom	Europe	1933
H1g1.1.2	CY045756	UnitedKingdom/1/1933	Human	H1	N1	UnitedKingdom	Europe	1933
H1g1.1.3	Z54287	Mongolia/153/88	Human	H1	N1	Mongolia	Asia	1988
H1g1.1.3	Z54288	Mongolia/111/91	Human	H1	N1	Mongolia	Asia	1991
H1g1.1.3	CY020469	Phila/1935	Human	H1	N1	USA	NorthAmerica	1935
H1g1.1.3	CY020445	Henry/1936	Human	H1	N1	USA	NorthAmerica	1936
H1g1.1.3	CY040170	PuertoRico/8-SV14/1934	Human	H1	N1	PuertoRico	NorthAmerica	1934
H1g1.1.3	AF389118	PuertoRico/8/34/MountSinai	Human	H1	N1	PuertoRico	NorthAmerica	1934
H1g1.1.3	CY033577	PuertoRico/8/1934	Human	H1	N1	PuertoRico	NorthAmerica	1934
H1g1.1.3	J02144	PuertoRico/8/34	Human	H1	N1	PuertoRico	NorthAmerica	1934
H1g1.1.3	CY045764	PuertoRico/8-1/1934	Human	H1	N1	PuertoRico	NorthAmerica	1934
H1g1.1.3	CY009444	PuertoRico/8/34	Human	H1	N1	PuertoRico	NorthAmerica	1934
H1g1.1.3	CY019955	Alaska/1935	Human	H1	N1	USA	NorthAmerica	1935
H1g1.1.3	EF467821	PuertoRico/8/34	Human	H1	N1	PuertoRico	NorthAmerica	1934
H1g1.1.3	V01088	PR/8/34	Human	H1	N1	PuertoRico	NorthAmerica	1934
H1g1.1.3	CY009324	Melbourne/35	Human	H1	N1	Australia	Oceania	1935
H1g1.1.3	CY045772	Melbourne/1/1946	Human	H1	N1	Australia	Oceania	1946
H1g1.1.4	AF494246	DSP/43	Human	H1	N1	UnitedKingdom	Europe	1943
H1g1.1.4	CY009276	Bel/1942	Human	H1	N1	USA	NorthAmerica	1942
H1g1.1.4	AF494247	Weiss/43	Human	H1	N1	USA	NorthAmerica	1943
H1g1.1.4	AF494248	Marton/43	Human	H1	N1	USA	NorthAmerica	1943
H1g1.1.4	CY020461	Iowa/1943	Human	H1	N1	USA	NorthAmerica	1943
H1g1.1.4	CY020285	AA/Marton/1943	Human	H1	N1	USA	NorthAmerica	1943
H1g1.1.4	CY009452	Weiss/43	Human	H1	N1	USA	NorthAmerica	1943
H1g1.1.4	CY021709	AA/Huston/1945	Human	H1	N1	USA	NorthAmerica	1945
H1g1.1.4	AF494251	Huston/43	Human	H1	N1	USA	NorthAmerica	1943
H1g1.1.5	AF494249	Rhodes/47	Human	H1	N1	USA	NorthAmerica	1947
H1g1.1.5	CY013271	Hickox/1940	Human	H1	N1	USA	NorthAmerica	1940
H1g1.1.5	AF494250	FortMonmouth/1/47	Human	H1	N1	USA	NorthAmerica	1947
H1g1.1.5	U02085	FortMonmouth/1/1947	Human	H1	N1	USA	NorthAmerica	1947
H1g1.1.5	CY045780	FortMonmouth/1/1947	Human	H1	N1	USA	NorthAmerica	1947
H1g1.1.5	AB043478	FortMonmouth/1/1947	Human	H1	N1	USA	NorthAmerica	1947
H1g1.1.5	CY009612	FortMonmouth/1/47	Human	H1	N1	USA	NorthAmerica	1947
H1g1.1.5	CY009596	Cam/46	Human	H1	N1	Australia	Oceania	1946
H1g1.1.6	CY009340	Malaysia/54	Human	H1	N1	Malaysia	Asia	1954
H1g1.1.6	CY021053	Malaya/302/1954	Human	H1	N1	Malaysia	Asia	1954
H1g1.1.6	AB043480	TF/15/1951	Human	H1	N1	Japan	Asia	1951
H1g1.1.6	AB043481	Tokyo/1/51	Human	H1	N1	Japan	Asia	1951
H1g1.1.6	CY021901	Albany/1618/1951	Human	H1	N1	USA	NorthAmerica	1951
H1g1.1.6	CY022093	Albany/13/1951	Human	H1	N1	USA	NorthAmerica	1951
H1g1.1.6	CY021821	Albany/12/1951	Human	H1	N1	USA	NorthAmerica	1951
H1g1.1.6	CY022021	Albany/14/1951	Human	H1	N1	USA	NorthAmerica	1951
H1g1.1.7	AB043486	Saga/2/1957	Human	H1	N1	Japan	Asia	1957
H1g1.1.7	AB043483	Taiwan/13/1954	Human	H1	N1	Taiwan	Asia	1954
H1g1.1.7	AB043482	Kojiya/1/1952	Human	H1	N1	Japan	Asia	1952
H1g1.1.7	AB043484	Yamagishi/55	Human	H1	N1	Japan	Asia	1955
H1g1.1.7	AB043485	Meguro/1/1956	Human	H1	N1	Japan	Asia	1956
H1g1.1.7	CY009332	FortWorth/50	Human	H1	N1	USA	NorthAmerica	1950
H1g1.1.7	CY008988	Denver/57	Human	H1	N1	USA	NorthAmerica	1957
H1g1.2.1.1	U85986	swine/England/191973/92	Swine	H1	N7	UnitedKingdom	Europe	1992
H1g1.2.1.1	CY019971	Roma/1949	Human	H1	N1	Italy	Europe	1949
H1g1.2.1.1	AB043479	Lepine/1948	Human	H1	N1	France	Europe	1948
H1g1.2.1.1	CY019947	Albany/4835/1948	Human	H1	N1	USA	NorthAmerica	1948
H1g1.2.1.1	CY021701	Albany/4836/1950	Human	H1	N1	USA	NorthAmerica	1950
H1g1.2.1.2	CY020573	Tientsin/78/1977	Human	H1	N1	China	Asia	1977
H1g1.2.1.3	Z54286	Mongolia/231/85	Human	H1	N1	Mongolia	Asia	1985
H1g1.2.1.3	K01331	USSR/90/1977	Human	H1	N1	Russia	Europe	1977
H1g1.2.1.3	DQ508897	USSR/90/1977	Human	H1	N1	Russia	Europe	1977
H1g1.2.1.3	CY010372	USSR/90/77	Human	H1	N1	Russia	Europe	1977
H1g1.2.1.3	L33488	Finland/92/1978	Human	H1	N1	Finland	Europe	1978
H1g1.2.1.3	L33757	Finland/20/1978	Human	H1	N1	Finland	Europe	1978
H1g1.2.1.3	L33484	Finland/44/1978	Human	H1	N1	Finland	Europe	1978
H1g1.2.1.3	CY009284	USSR/92/77	Human	H1	N1	Russia	Europe	1977
H1g1.2.1.3	K01330	USSR/90/77	Human	H1	N1	Russia	Europe	1977
H1g1.2.1.3	M38312	Leningrad/1954/1	Human	H1	N1	Russia	Europe	1954
H1g1.2.1.3	CY010884	Memphis/13/1978	Human	H1	N1	USA	NorthAmerica	1978
H1g1.2.1.3	CY010868	Memphis/10/1978	Human	H1	N1	USA	NorthAmerica	1978
H1g1.2.1.3	CY010900	Memphis/17/1978	Human	H1	N1	USA	NorthAmerica	1978
H1g1.2.1.3	CY011296	Memphis/1/1978	Human	H1	N1	USA	NorthAmerica	1978
H1g1.2.1.3	CY010876	Memphis/11/1978	Human	H1	N1	USA	NorthAmerica	1978
H1g1.2.1.3	CY010892	Memphis/15/1978	Human	H1	N1	USA	NorthAmerica	1978
H1g1.2.1.3	CY017363	Memphis/20/1978	Human	H1	N1	USA	NorthAmerica	1978
H1g1.2.2	CY009292	HongKong/117/77	Human	H1	N1	HongKong	Asia	1977
H1g1.2.2	M38353	Kiev/59/1979	Human	H1	N1	Ukraine	Europe	1979
H1g1.2.2	CY021909	USSR/46/1979	Human	H1	N1	Russia	Europe	1979
H1g1.2.2	CY020181	Maryland/2/1980	Human	H1	N1	USA	NorthAmerica	1980
H1g1.2.2	CY020165	Lackland/3/1978	Human	H1	N1	USA	NorthAmerica	1978
H1g1.2.2	CY028724	California/45/1978	Human	H1	N1	USA	NorthAmerica	1978
H1g1.2.2	CY026411	Albany/8/1979	Human	H1	N1	USA	NorthAmerica	1979
H1g1.2.2	CY019739	Memphis/1/1979	Human	H1	N1	USA	NorthAmerica	1979
H1g1.2.2	CY021717	California/10/1978	Human	H1	N1	USA	NorthAmerica	1978
H1g1.2.2	CY019963	Arizona/14/1978	Human	H1	N1	USA	NorthAmerica	1978
H1g1.2.2	CY020173	Lackland/7/1978	Human	H1	N1	USA	NorthAmerica	1978
H1g1.2.2	CY021797	Albany/20/1978	Human	H1	N1	USA	NorthAmerica	1978
H1g1.2.2	CY020293	Brazil/11/1978	Human	H1	N1	Brazil	SouthAmerica	1978
H1g1.2.3	CY020453	India/6263/1980	Human	H1	N1	India	Asia	1980
H1g1.2.3	L33491	Finland/4/1984	Human	H1	N1	Finland	Europe	1984
H1g1.2.3	L33492	Finland/5/1984	Human	H1	N1	Finland	Europe	1984
H1g1.2.3	L33489	Finland/1/1982	Human	H1	N1	Finland	Europe	1982
H1g1.2.3	CY010364	Baylor/11515/82	Human	H1	N1	USA	NorthAmerica	1982
H1g1.2.3	CY019755	Memphis/49/1983	Human	H1	N1	USA	NorthAmerica	1983
H1g1.2.3	CY009620	Baylor/11735/82	Human	H1	N1	USA	NorthAmerica	1982
H1g1.2.3	CY015524	Memphis/6/1983	Human	H1	N1	USA	NorthAmerica	1983
H1g1.2.3	CY012888	Memphis/2/1983	Human	H1	N1	USA	NorthAmerica	1983
H1g1.2.3	CY012880	Memphis/1/1983	Human	H1	N1	USA	NorthAmerica	1983
H1g1.2.3	CY021029	Baylor/4052/1981	Human	H1	N1	USA	NorthAmerica	1981
H1g1.2.3	CY010908	Memphis/7/1980	Human	H1	N1	USA	NorthAmerica	1980
H1g1.2.4	L33493	Finland/9/1984	Human	H1	N1	Finland	Europe	1984
H1g1.2.4	CY021037	Christ'sHospital/157/1982	Human	H1	N1	UnitedKingdom	Europe	1982
H1g1.2.4	L33490	Finland/1/1984	Human	H1	N1	Finland	Europe	1984
H1g1.2.4	CY021725	Memphis/1/1984	Human	H1	N1	USA	NorthAmerica	1984
H1g1.2.4	M59327	Ohio/101/1983	Human	H1	N1	USA	NorthAmerica	1983
H1g1.2.4	M59328	Ohio/201/1983	Human	H1	N1	USA	NorthAmerica	1983
H1g1.2.4	M59326	Ohio/101/1983	Human	H1	N1	USA	NorthAmerica	1983
H1g1.2.4	M59325	Ohio/101/1983	Human	H1	N1	USA	NorthAmerica	1983
H1g1.2.4	CY019069	Memphis/46/1983	Human	H1	N1	USA	NorthAmerica	1983
H1g1.2.4	CY027531	Memphis/44/1983	Human	H1	N1	USA	NorthAmerica	1983
H1g1.2.4	CY017251	Memphis/32/1983	Human	H1	N1	USA	NorthAmerica	1983
H1g1.2.4	CY019093	Memphis/51/1983	Human	H1	N1	USA	NorthAmerica	1983
H1g1.2.4	CY019053	Memphis/41/1983	Human	H1	N1	USA	NorthAmerica	1983
H1g1.2.4	CY019077	Memphis/48/1983	Human	H1	N1	USA	NorthAmerica	1983
H1g1.2.4	CY020237	Memphis/39/1983	Human	H1	N1	USA	NorthAmerica	1983
H1g1.2.4	CY013879	Memphis/10/1983	Human	H1	N1	USA	NorthAmerica	1983
H1g1.2.4	CY017243	Memphis/30/1983	Human	H1	N1	USA	NorthAmerica	1983
H1g1.2.4	CY019229	Memphis/47/1983	Human	H1	N1	USA	NorthAmerica	1983
H1g1.2.4	CY017211	Memphis/24/1983	Human	H1	N1	USA	NorthAmerica	1983
H1g1.2.4	CY019085	Memphis/50/1983	Human	H1	N1	USA	NorthAmerica	1983
H1g1.2.4	CY017877	Memphis/35/1983	Human	H1	N1	USA	NorthAmerica	1983
H1g1.2.4	CY017435	Memphis/26/1983	Human	H1	N1	USA	NorthAmerica	1983
H1g1.2.4	CY017869	Memphis/25/1983	Human	H1	N1	USA	NorthAmerica	1983
H1g1.2.4	CY011312	Memphis/13/1983	Human	H1	N1	USA	NorthAmerica	1983
H1g1.2.4	CY019061	Memphis/42/1983	Human	H1	N1	USA	NorthAmerica	1983
H1g1.2.4	CY019221	Memphis/31/1983	Human	H1	N1	USA	NorthAmerica	1983
H1g1.2.4	CY019045	Memphis/40/1983	Human	H1	N1	USA	NorthAmerica	1983
H1g1.2.4	CY011304	Memphis/11/1983	Human	H1	N1	USA	NorthAmerica	1983
H1g1.2.4	CY017235	Memphis/29/1983	Human	H1	N1	USA	NorthAmerica	1983
H1g1.2.4	CY019237	Memphis/53/1983	Human	H1	N1	USA	NorthAmerica	1983
H1g1.2.4	CY010916	Memphis/3/1983	Human	H1	N1	USA	NorthAmerica	1983
H1g1.2.4	CY010964	Memphis/16/1983	Human	H1	N1	USA	NorthAmerica	1983
H1g1.2.4	CY017427	Memphis/22/1983	Human	H1	N1	USA	NorthAmerica	1983
H1g1.2.4	CY017219	Memphis/27/1983	Human	H1	N1	USA	NorthAmerica	1983
H1g1.2.4	CY019037	Memphis/38/1983	Human	H1	N1	USA	NorthAmerica	1983
H1g1.2.4	CY010972	Memphis/17/1983	Human	H1	N1	USA	NorthAmerica	1983
H1g1.2.4	CY010980	Memphis/18/1983	Human	H1	N1	USA	NorthAmerica	1983
H1g1.2.4	CY017419	Memphis/21/1983	Human	H1	N1	USA	NorthAmerica	1983
H1g1.2.4	CY013295	Memphis/14/1983	Human	H1	N1	USA	NorthAmerica	1983
H1g1.2.4	CY017195	Memphis/20/1983	Human	H1	N1	USA	NorthAmerica	1983
H1g1.2.4	CY019763	Memphis/54/1983	Human	H1	N1	USA	NorthAmerica	1983
H1g1.2.4	CY012440	Memphis/19/1983	Human	H1	N1	USA	NorthAmerica	1983
H1g1.2.4	CY017203	Memphis/23/1983	Human	H1	N1	USA	NorthAmerica	1983
H1g1.2.4	CY017227	Memphis/28/1983	Human	H1	N1	USA	NorthAmerica	1983
H1g1.2.4	CY010924	Memphis/4/1983	Human	H1	N1	USA	NorthAmerica	1983
H1g1.2.4	CY010932	Memphis/7/1983	Human	H1	N1	USA	NorthAmerica	1983
H1g1.2.4	CY010940	Memphis/8/1983	Human	H1	N1	USA	NorthAmerica	1983
H1g1.2.4	CY010948	Memphis/12/1983	Human	H1	N1	USA	NorthAmerica	1983
H1g1.2.4	CY010956	Memphis/15/1983	Human	H1	N1	USA	NorthAmerica	1983
H1g1.2.4	M59324	Ohio/101/1983	Human	H1	N1	USA	NorthAmerica	1983
H1g1.2.4	AJ289702	Fiji/15899/83	Human	H1	N1	Fiji	Oceania	1983
H1g1.2.4	CY020485	Tonga/14/1984	Human	H1	N1	Tonga	Oceania	1984
H1g1.2.4	CY020189	NewZealand/7/1983	Human	H1	N1	NewZealand	Oceania	1983
H1g1.2.4	X17221	CHR/157/83	Human	H1	N1	NewZealand	Oceania	1983
H1g1.2.4	CY020437	Chile/1/1983	Human	H1	N1	Chile	SouthAmerica	1983
H1g1.3.1	AM777812	swine/Cotesd''Armor/0214/2006	Swine	H1	N2	France	Europe	2006
H1g1.3.2	AM503896	swine/Cotesd''Armor/60293/2001	Swine	H1	N1	France	Europe	2001
H1g1.3.2	AM503897	swine/Cotesd''Armor/98574/2001	Swine	H1	N1	France	Europe	2001
H1g1.3.3	AF085416	swine/England/17394/96	Swine	H1	N2	UnitedKingdom	Europe	1996
H1g1.3.3	AF085417	swine/England/72685/96	Swine	H1	N2	UnitedKingdom	Europe	1996
H1g1.3.4	AF085414	swine/England/438207/94	Swine	H1	N2	UnitedKingdom	Europe	1994
H1g1.3.4	AF085413	swine/Scotland/410440/94	Swine	H1	N2	UnitedKingdom	Europe	1994
H1g1.3.5.1	AF085415	swine/England/690421/95	Swine	H1	N2	UnitedKingdom	Europe	1995
H1g1.3.5.2.1	AJ344012	swine/Italy/1521/98	Swine	H1	N2	Italy	Europe	1998
H1g1.3.5.2.1	AJ412710	swine/Cotesd'Armor/2433/98	Swine	H1	N2	France	Europe	1998
H1g1.3.5.2.1	AJ344007	swine/Cotesd'Armor/790/97	Swine	H1	N2	France	Europe	1997
H1g1.3.5.2.1	AJ344005	swine/Cotesd'Armor/800/00	Swine	H1	N2	France	Europe	2000
H1g1.3.5.2.1	AJ344006	swine/Cotesd'Armor/799/00	Swine	H1	N2	France	Europe	2000
H1g1.3.5.2.1	AM503898	swine/Cotesd''Armor/50388/2000	Swine	H1	N2	France	Europe	2000
H1g1.3.5.2.2	AM777814	swine/Cotesd''Armor/0111/2007	Swine	H1	N2	France	Europe	2007
H1g1.3.5.2.2	AM777815	swine/Cotesd''Armor/0125/2007	Swine	H1	N2	France	Europe	2007
H1g1.3.5.2.2	AM503894	swine/Cotesd''Armor/0190/2006	Swine	H1	N1	France	Europe	2006
H1g1.3.5.2.2	AM503899	swine/Cotesd''Armor/43394/2002	Swine	H1	N2	France	Europe	2002
H1g1.3.5.2.2	AM503901	swine/Cotesd''Armor/0123/2006	Swine	H1	N2	France	Europe	2006
H1g1.3.5.2.2	AM490224	swine/Cotesd''Armor/0136_17/2006	Swine	H1	N2	France	Europe	2006
H1g1.3.5.2.2	AM503903	swine/Cotesd''Armor/0041/2007	Swine	H1	N2	France	Europe	2007
H1g1.3.5.3.1	AY590822	sw/Gent/108/01	Swine	H1	N2	Belgium	Europe	2001
H1g1.3.5.3.1	AJ344010	swine/Italy/1081/00	Swine	H1	N2	Italy	Europe	2000
H1g1.3.5.3.1	EU053148	swine/Bakum/1832/2000	Swine	H1	N2	Germany	Europe	2000
H1g1.3.5.3.1	GQ161104	swine/Bakum/1832/2000	Swine	H1	N2	Germany	Europe	2000
H1g1.3.5.3.2	GQ161145	swine/Kitzen/IDT6142/2007	Swine	H1	N2	Germany	Europe	2007
H1g1.3.5.3.2	GQ161141	swine/Groitzsch/IDT6016-1/2007	Swine	H1	N2	Germany	Europe	2007
H1g1.3.5.3.2	GQ161143	swine/Groitzsch/IDT6016-2/2007	Swine	H1	N2	Germany	Europe	2007
H1g1.3.5.3.2	GQ161163	swine/Granstedt/IDT3475/2004	Swine	H1	N2	Germany	Europe	2004
H1g1.3.5.3.2	EU053133	swine/Doetlingen/IDT4735/2005	Swine	H1	N2	Germany	Europe	2005
H1g1.3.5.3.2	EU053141	swine/Cloppenburg/IDT4777/2005	Swine	H1	N2	Germany	Europe	2005
H1g1.4.1.1	L19005	Xianfeng/3/1989	Human	H1	N2	China	Asia	1989
H1g1.4.1.1	L19006	Harbin/1/1989	Human	H1	N2	China	Asia	1989
H1g1.4.1.1	L19008	Harbin/1/1988	Human	H1	N2	China	Asia	1988
H1g1.4.1.1	L19024	Sichuan/4/1988	Human	H1	N1	China	Asia	1988
H1g1.4.1.1	AB043487	Kamata/85/1987	Human	H1	N1	Japan	Asia	1987
H1g1.4.1.1	D00407	Taiwan/1/1986	Human	H1	N1	Taiwan	Asia	1986
H1g1.4.1.1	X17224	TAIWAN/1/86	Human	H1	N1	Taiwan	Asia	1986
H1g1.4.1.1	DQ508873	Taiwan/01/1986	Human	H1	N1	Taiwan	Asia	1986
H1g1.4.1.1	Z54289	Mongolia/162/91	Human	H1	N1	Mongolia	Asia	1991
H1g1.4.1.1	D00841	Yamagata/120/1986	Human	H1	N1	Japan	Asia	1986
H1g1.4.1.1	EU004452	swine/Henan/01/06	Swine	H1	N1	China	Asia	2006
H1g1.4.1.1	EU004444	swine/Tianjin/01/04	Swine	H1	N1	China	Asia	2004
H1g1.4.1.1	CY020477	Singapore/6/1986	Human	H1	N1	Singapore	Asia	1986
H1g1.4.1.1	D00406	Singapore/6/1986	Human	H1	N1	Singapore	Asia	1986
H1g1.4.1.1	CY045852	Siena/4/1987	Human	H1	N1	Italy	Europe	1987
H1g1.4.1.1	L19015	Czechoslovakia/2/1988	Human	H1	N1	CzechRepublic	Europe	1988
H1g1.4.1.1	L19016	Franch/6908/1989	Human	H1	N1	France	Europe	1989
H1g1.4.1.1	CY036943	Siena/9/1989	Human	H1	N1	Italy	Europe	1989
H1g1.4.1.1	L33486	Finland/53/1987	Human	H1	N1	Finland	Europe	1987
H1g1.4.1.1	L33483	Finland/42/1986	Human	H1	N1	Finland	Europe	1986
H1g1.4.1.1	L33485	Finland/45/1987	Human	H1	N1	Finland	Europe	1987
H1g1.4.1.1	L19019	France/15/1988	Human	H1	N1	France	Europe	1988
H1g1.4.1.1	L33487	Finland/70/1988	Human	H1	N1	Finland	Europe	1988
H1g1.4.1.1	L33753	Finland/73/1988	Human	H1	N1	Finland	Europe	1988
H1g1.4.1.1	L19025	SouthCarolina/6/1988	Human	H1	N1	USA	NorthAmerica	1988
H1g1.4.1.1	CY019779	Memphis/4/1987	Human	H1	N1	USA	NorthAmerica	1987
H1g1.4.1.1	M33748	SL/2/1987	Human	H1	N1	USA	NorthAmerica	1987
H1g1.4.1.1	CY021973	Memphis/1/1987	Human	H1	N1	USA	NorthAmerica	1987
H1g1.4.1.1	L19012	Trinidad/2/1986	Human	H1	N1	TrinidadandTobago	NorthAmerica	1986
H1g1.4.1.1	CY019101	Memphis/12/1986	Human	H1	N1	USA	NorthAmerica	1986
H1g1.4.1.1	CY019771	Memphis/3/1987	Human	H1	N1	USA	NorthAmerica	1987
H1g1.4.1.1	CY020565	Texas/2922-3/1986	Human	H1	N1	USA	NorthAmerica	1986
H1g1.4.1.1	CY021733	NewYork/2924-1/1986	Human	H1	N1	USA	NorthAmerica	1986
H1g1.4.1.1	L19011	Fiji/2/1988	Human	H1	N1	Fiji	Oceania	1988
H1g1.4.1.1	L19023	Victoria/43/1988	Human	H1	N1	Australia	Oceania	1988
H1g1.4.1.2	L19014	Fukushima/2/1988	Human	H1	N1	Japan	Asia	1988
H1g1.4.1.2	AB043488	Nagano/1669/1989	Human	H1	N1	Japan	Asia	1989
H1g1.4.1.2	D31949	Yamagata/32/1989	Human	H1	N1	Japan	Asia	1989
H1g1.4.1.2	D13574	Suita/1/89/	Human	H1	N1	Japan	Asia	2000
H1g1.4.1.2	D13573	Suita/1/89	Human	H1	N1	Japan	Asia	1989
H1g1.4.1.2	X59778	NIB/4/1988	Human	H1	N1	UnitedKingdom	Europe	1988
H1g1.4.1.2	L33752	Finland/72/1988	Human	H1	N1	Finland	Europe	1988
H1g1.4.1.2	L19028	Czechoslovakia/2/1989	Human	H1	N1	CzechRepublic	Europe	1989
H1g1.4.1.2	CY036823	Siena/10/1989	Human	H1	N1	Italy	Europe	1989
H1g1.4.1.2	L33754	Finland/74/1988	Human	H1	N1	Finland	Europe	1988
H1g1.4.1.2	L33756	Finland/91/1989	Human	H1	N1	Finland	Europe	1989
H1g1.4.1.2	L33755	Finland/75/1988	Human	H1	N1	Finland	Europe	1988
H1g1.4.1.2	L19022	Arizona/1/1990	Human	H1	N1	USA	NorthAmerica	1990
H1g1.4.1.2	L19021	Canada/7/1988	Human	H1	N1	Canada	NorthAmerica	1988
H1g1.4.1.2	L19027	Massachusetts/1/1990	Human	H1	N1	USA	NorthAmerica	1990
H1g1.4.1.2	L19018	Goroka/2/1990	Human	H1	N1	PapuaNewGuinea	Oceania	1990
H1g1.4.1.3	AF055426	Taiwan/2243+C44/1992	Human	H1	N1	Taiwan	Asia	1992
H1g1.4.1.3	D28518	sw/Obihiro/5/1992	Swine	H1	N1	Japan	Asia	1992
H1g1.4.1.3	AB043490	Aichi/24/1992	Human	H1	N1	Japan	Asia	1992
H1g1.4.1.3	D10163	Hebei/24/1989	Human	H1	N2	China	Asia	1989
H1g1.4.1.3	AB043489	Nagano/92/1991	Human	H1	N1	Japan	Asia	1991
H1g1.4.1.3	L33743	Seoul/20/1991	Human	H1	N1	SouthKorea	Asia	1991
H1g1.4.1.3	L20110	Singapore/10/90MDCK-andegg-isolates	Human	H1	N1	Singapore	Asia	1990
H1g1.4.1.3	L20111	Singapore/10/90originalspecimen	Human	H1	N1	Singapore	Asia	1990
H1g1.4.1.3	L20106	singapore/03/90fromembryonatedegg	Human	H1	N1	Singapore	Asia	1990
H1g1.4.1.3	L19026	Singapore/6/1990	Human	H1	N1	Singapore	Asia	1990
H1g1.4.1.3	L20107	Singapore/03/90originalspecimenandMDCKisolates	Human	H1	N1	Singapore	Asia	1990
H1g1.4.1.3	L20109	singapore/06/90originalspecimenandMDCKisolate	Human	H1	N1	Singapore	Asia	1990
H1g1.4.1.3	L20108	Singapore/06/90fromembryonatedegg	Human	H1	N1	Singapore	Asia	1990
H1g1.4.1.3	L19017	Qingdao/28/1991	Human	H1	N1	China	Asia	1991
H1g1.4.1.3	L20116	Singapore/12/90fromembryonatedegg	Human	H1	N1	Singapore	Asia	1990
H1g1.4.1.3	L20117	Singapore/12/90originalspecimenandMDCKisolates	Human	H1	N1	Singapore	Asia	1990
H1g1.4.1.3	L20112	Singapore/11/90fromembryonatedegg	Human	H1	N1	Singapore	Asia	1990
H1g1.4.1.3	L20113	Singapore/11/90originalspecimenandMDCKisolates	Human	H1	N1	Singapore	Asia	1990
H1g1.4.1.3	L33751	Finland/196/1991	Human	H1	N1	Finland	Europe	1991
H1g1.4.1.3	L33480	Leningrad/109/1991	Human	H1	N1	Russia	Europe	1991
H1g1.4.1.3	L33481	Leningrad/133/1991	Human	H1	N1	Russia	Europe	1991
H1g1.4.1.3	L33482	Vilnus/48/1991	Human	H1	N1	Lithuania	Europe	1991
H1g1.4.1.3	L33744	Netherland/813/1991	Human	H1	N1	Netherlands	Europe	1991
H1g1.4.1.3	L33746	Groningen/9939/1991	Human	H1	N1	Netherlands	Europe	1991
H1g1.4.1.3	L33745	Groningen/9938/1991	Human	H1	N1	Netherlands	Europe	1991
H1g1.4.1.3	L33758	Umea/2/1991	Human	H1	N1	Sweden	Europe	1991
H1g1.4.1.3	L33750	Finland/188/1991	Human	H1	N1	Finland	Europe	1991
H1g1.4.1.3	L19013	Stockholm/26/1990	Human	H1	N1	Sweden	Europe	1990
H1g1.4.1.3	L19549	Finland/158/1991	Human	H1	N1	Finland	Europe	1991
H1g1.4.1.3	L33748	Finland/160/1991	Human	H1	N1	Finland	Europe	1991
H1g1.4.1.3	L33747	Finland/154/1991	Human	H1	N1	Finland	Europe	1991
H1g1.4.1.3	L33749	Finland/164/1991	Human	H1	N1	Finland	Europe	1991
H1g1.4.1.3	L33780	Finland/168/1991	Human	H1	N1	Finland	Europe	1991
H1g1.4.1.3	CY013303	NewYork/656/1995	Human	H1	N1	USA	NorthAmerica	1995
H1g1.4.1.3	L19020	Texas/22/1990	Human	H1	N1	USA	NorthAmerica	1990
H1g1.4.1.3	EF566036	Texas/36/91	Human	H1	N1	USA	NorthAmerica	1991
H1g1.4.1.3	AJ457908	Texas/36/91	Human	H1	N1	USA	NorthAmerica	1991
H1g1.4.1.3	DQ508889	Texas/36/1991	Human	H1	N1	USA	NorthAmerica	1991
H1g1.4.1.3	AY289927	Texas/36/91	Human	H1	N1	USA	NorthAmerica	1991
H1g1.4.1.3	CY009316	Texas/36/91	Human	H1	N1	USA	NorthAmerica	1991
H1g1.4.1.3	CY033655	Texas/36/1991	Human	H1	N1	USA	NorthAmerica	1991
H1g1.4.2.1	AJ457907	Bayern/7/95	Human	H1	N1	Germany	Europe	1995
H1g1.4.2.1	CY013279	NewYork/643/1995	Human	H1	N1	USA	NorthAmerica	1995
H1g1.4.2.1	CY010532	NewYork/621/1995	Human	H1	N1	USA	NorthAmerica	1995
H1g1.4.2.1	CY010492	NewYork/605/1995	Human	H1	N1	USA	NorthAmerica	1995
H1g1.4.2.1	CY010508	NewYork/615/1995	Human	H1	N1	USA	NorthAmerica	1995
H1g1.4.2.2	AJ457906	Johannesburg/82/96	Human	H1	N1	SouthAfrica	Africa	1996
H1g1.4.2.2	DQ415316	TW/130/96	Human	H1	N1	Taiwan	Asia	1996
H1g1.4.2.2	AF026158	Taiwan/118/1996-1	Human	H1	N1	Taiwan	Asia	1996
H1g1.4.2.2	AF026159	Taiwan/118/1996-2	Human	H1	N1	Taiwan	Asia	1996
H1g1.4.2.2	AF026160	Taiwan/118/1996-3	Human	H1	N1	Taiwan	Asia	1996
H1g1.4.2.2	AF026154	Taiwan/112/1996-2	Human	H1	N1	Taiwan	Asia	1996
H1g1.4.2.2	AB043493	Aichi/25/1996	Human	H1	N1	Japan	Asia	1996
H1g1.4.2.2	AB117210	Nagoya/27/1995	Human	H1	N1	Japan	Asia	1995
H1g1.4.2.2	AB117216	Tokushima/20/1996	Human	H1	N1	Japan	Asia	1996
H1g1.4.2.2	AF026153	Taiwan/112/1996-1	Human	H1	N1	Taiwan	Asia	1996
H1g1.4.2.2	AB117207	Nagano/6059/1996	Human	H1	N1	Japan	Asia	1996
H1g1.4.2.2	AF026155	Taiwan/117/1996-1	Human	H1	N1	Taiwan	Asia	1996
H1g1.4.2.2	AF026157	Taiwan/117/1996-3	Human	H1	N1	Taiwan	Asia	1996
H1g1.4.2.2	AF026156	Taiwan/117/1996-2	Human	H1	N1	Taiwan	Asia	1996
H1g1.4.2.2	AB117219	Yamanashi/11/1996	Human	H1	N1	Japan	Asia	1996
H1g1.4.2.2	AB043491	Kamata/381/1995	Human	H1	N1	Japan	Asia	1995
H1g1.4.2.2	AB117204	Kyoto/1/1995	Human	H1	N1	Japan	Asia	1995
H1g1.4.2.2	AB043492	Kamata/69/1996	Human	H1	N1	Japan	Asia	1996
H1g1.4.2.2	AY289930	Shenzhen/227/95	Human	H1	N1	China	Asia	1995
H1g1.4.2.2	AJ457905	Madrid/930/99	Human	H1	N1	Spain	Europe	1999
H1g1.4.2.2	CY036839	Siena/14/1995	Human	H1	N1	Italy	Europe	1995
H1g1.4.2.2	CY013287	NewYork/646/1996	Human	H1	N1	USA	NorthAmerica	1996
H1g1.4.2.2	CY019867	Memphis/13/1996	Human	H1	N1	USA	NorthAmerica	1996
H1g1.4.2.2	AY282756	Memphis/14/96-M	Human	H1	N1	USA	NorthAmerica	1996
H1g1.4.2.2	AY282757	Memphis/14/96-M1	Human	H1	N1	USA	NorthAmerica	1996
H1g1.4.2.2	CY010484	NewYork/604/1995	Human	H1	N1	USA	NorthAmerica	1995
H1g1.4.2.2	CY010804	NewYork/614/1995	Human	H1	N1	USA	NorthAmerica	1995
H1g1.4.2.2	CY019125	Memphis/5/1996	Human	H1	N1	USA	NorthAmerica	1996
H1g1.4.2.2	CY010844	NewYork/640/1996	Human	H1	N1	USA	NorthAmerica	1996
H1g1.4.2.2	CY020253	Memphis/14/1996	Human	H1	N1	USA	NorthAmerica	1996
H1g1.4.2.2	CY019795	Memphis/10/1996	Human	H1	N1	USA	NorthAmerica	1996
H1g1.4.2.2	CY016963	NewYork/633/1995	Human	H1	N1	USA	NorthAmerica	1995
H1g1.4.2.2	CY019803	Memphis/11/1996	Human	H1	N1	USA	NorthAmerica	1996
H1g1.4.2.2	CY010740	NewYork/644/1995	Human	H1	N1	USA	NorthAmerica	1995
H1g1.4.2.2	CY010820	NewYork/638/1995	Human	H1	N1	USA	NorthAmerica	1995
H1g1.4.2.2	CY010540	NewYork/627/1995	Human	H1	N1	USA	NorthAmerica	1995
H1g1.4.2.2	CY021005	Memphis/15/1996	Human	H1	N1	USA	NorthAmerica	1996
H1g1.4.2.2	CY011280	NewYork/649/1995	Human	H1	N1	USA	NorthAmerica	1995
H1g1.4.2.2	AF398874	Charlottesville/28/95	Human	H1	N1	USA	NorthAmerica	1995
H1g1.4.2.2	AF398875	Charlottesville/28/95	Human	H1	N1	USA	NorthAmerica	1995
H1g1.4.2.2	CY012872	NewYork/650/1995	Human	H1	N1	USA	NorthAmerica	1995
H1g1.4.2.2	CY010524	NewYork/620/1995	Human	H1	N1	USA	NorthAmerica	1995
H1g1.4.2.2	CY012856	NewYork/630/1995	Human	H1	N1	USA	NorthAmerica	1995
H1g1.4.2.2	CY010500	NewYork/607/1995	Human	H1	N1	USA	NorthAmerica	1995
H1g1.4.2.2	CY011272	NewYork/645/1995	Human	H1	N1	USA	NorthAmerica	1995
H1g1.4.2.2	CY010836	NewYork/653/1996	Human	H1	N1	USA	NorthAmerica	1996
H1g1.4.2.2	CY013871	NewYork/616/1995	Human	H1	N1	USA	NorthAmerica	1995
H1g1.4.2.2	CY010828	NewYork/651/1995	Human	H1	N1	USA	NorthAmerica	1995
H1g1.4.2.2	CY011792	NewYork/626/1996	Human	H1	N1	USA	NorthAmerica	1996
H1g1.4.2.2	CY012864	NewYork/642/1995	Human	H1	N1	USA	NorthAmerica	1995
H1g1.4.2.2	CY019133	Memphis/7/1996	Human	H1	N1	USA	NorthAmerica	1996
H1g1.4.2.2	CY015532	NewYork/694/1995	Human	H1	N1	USA	NorthAmerica	1995
H1g1.4.2.2	CY011800	NewYork/629/1995	Human	H1	N1	USA	NorthAmerica	1995
H1g1.4.2.2	CY019109	Memphis/2/1996	Human	H1	N1	USA	NorthAmerica	1996
H1g1.4.2.2	CY019117	Memphis/3/1996	Human	H1	N1	USA	NorthAmerica	1996
H1g1.4.2.2	AF398878	Charlottesville/31/95	Human	H1	N1	USA	NorthAmerica	1995
H1g1.4.2.2	CY019787	Memphis/6/1996	Human	H1	N1	USA	NorthAmerica	1996
H1g1.4.3.1	EF462563	SouthAfrica/214/1999	Human	H1	N1	SouthAfrica	Africa	1999
H1g1.4.3.1	DQ534415	Kenitra/15/97	Human	H1	N1	Morocco	Africa	1997
H1g1.4.3.1	DQ534416	Rabat/10/97	Human	H1	N1	Morocco	Africa	1997
H1g1.4.3.1	DQ534419	Rabat/137/97	Human	H1	N1	Morocco	Africa	1997
H1g1.4.3.1	DQ534417	Kenitra/20/97	Human	H1	N1	Morocco	Africa	1997
H1g1.4.3.1	DQ534418	Rabat/134/97	Human	H1	N1	Morocco	Africa	1997
H1g1.4.3.1	AF386773	Switzerland/5389/95	Human	H1	N1	Switzerland	Europe	1995
H1g1.4.3.1	AF386774	Switzerland/5389/95	Human	H1	N1	Switzerland	Europe	1995
H1g1.4.3.1	AF131995	Lyon/3043/96	Human	H1	N1	France	Europe	1996
H1g1.4.3.1	AF131993	Lyon/3043/96	Human	H1	N1	France	Europe	1996
H1g1.4.3.1	AF131994	Lyon/3043/96	Human	H1	N1	France	Europe	1996
H1g1.4.3.1	AY063229	Ecuador/2625/01	Human	H1	N1	Ecuador	SouthAmerica	2001
H1g1.4.3.2	AJ457904	Iceland/25/2000	Human	H1	N1	Iceland	Europe	2000
H1g1.4.3.2	AF534026	BuenosAires/T114/97	Human	H1	N1	Argentina	SouthAmerica	1997
H1g1.4.3.2	AF534025	BuenosAires/A64/97	Human	H1	N1	Argentina	SouthAmerica	1997
H1g1.4.3.2	AF534027	BuenosAires/T118/97	Human	H1	N1	Argentina	SouthAmerica	1997
H1g1.4.3.2	AF534030	BuenosAires/6177/99	Human	H1	N1	Argentina	SouthAmerica	1999
H1g1.4.3.2	AF534031	BuenosAires/344/99	Human	H1	N1	Argentina	SouthAmerica	1999
H1g1.4.3.3	AB043499	Yokohama/24/2000	Human	H1	N1	Japan	Asia	2000
H1g1.4.3.3	AB117197	Chiba-C/402/2000	Human	H1	N1	Japan	Asia	2000
H1g1.4.3.3	AB117220	Yokohama/24/2000	Human	H1	N1	Japan	Asia	2000
H1g1.4.3.3	AJ457903	Denmark/39/2000	Human	H1	N1	Denmark	Europe	2000
H1g1.4.3.3	AJ457868	Greece/158/2001	Human	H1	N1	Greece	Europe	2001
H1g1.4.3.3	AJ457902	Dublin/9852/2000	Human	H1	N1	Ireland	Europe	2000
H1g1.4.3.3	EU097937	Denmark/14/2001	Human	H1	N1	Denmark	Europe	2001
H1g1.4.3.3	EU097939	Denmark/17/2001	Human	H1	N1	Denmark	Europe	2001
H1g1.4.3.3	EU097933	Denmark/40/2001	Human	H1	N1	Denmark	Europe	2001
H1g1.4.3.3	EU097935	Denmark/6/2001	Human	H1	N1	Denmark	Europe	2001
H1g1.4.3.3	AJ457865	Denmark/40/2001	Human	H1	N1	Denmark	Europe	2001
H1g1.4.3.3	CY000449	NewYork/146/2000	Human	H1	N1	USA	NorthAmerica	2000
H1g1.4.3.3	CY008148	NewYork/307/2001	Human	H1	N1	USA	NorthAmerica	2001
H1g1.4.3.3	CY017019	SouthAustralia/29/2000	Human	H1	N1	Australia	Oceania	2000
H1g1.4.3.3	CY018933	SouthAustralia/40/2000	Human	H1	N1	Australia	Oceania	2000
H1g1.4.3.3	CY017147	SouthAustralia/36/2000	Human	H1	N1	Australia	Oceania	2000
H1g1.4.3.3	CY017139	SouthAustralia/25/2000	Human	H1	N1	Australia	Oceania	2000
H1g1.4.3.3	CY016667	SouthAustralia/45/2000	Human	H1	N1	Australia	Oceania	2000
H1g1.4.3.3	CY017379	SouthAustralia/26/2000	Human	H1	N1	Australia	Oceania	2000
H1g1.4.3.3	CY017813	SouthAustralia/30/2000	Human	H1	N1	Australia	Oceania	2000
H1g1.4.3.3	CY021749	SouthAustralia/44/2000	Human	H1	N1	Australia	Oceania	2000
H1g1.4.3.3	CY017155	SouthAustralia/46/2000	Human	H1	N1	Australia	Oceania	2000
H1g1.4.3.3	CY016723	SouthAustralia/63/2000	Human	H1	N1	Australia	Oceania	2000
H1g1.4.3.3	CY016731	SouthAustralia/64/2000	Human	H1	N1	Australia	Oceania	2000
H1g1.4.3.3	CY017829	SouthAustralia/39/2000	Human	H1	N1	Australia	Oceania	2000
H1g1.4.3.3	AF534038	Neuquen/1381/99	Human	H1	N1	Argentina	SouthAmerica	1999
H1g1.4.3.3	AF534043	Cordoba/VA418/99	Human	H1	N1	Argentina	SouthAmerica	1999
H1g1.5.1	CY045543	swine/Oklahoma/053259/2008	Swine	H1	N2	USA	NorthAmerica	2008
H1g1.5.1	CY045711	swine/Oklahoma/042169/2008	Swine	H1	N2	USA	NorthAmerica	2008
H1g1.5.1	CY045527	swine/Texas/050593/2008	Swine	H1	N2	USA	NorthAmerica	2008
H1g1.5.1	CY045535	swine/Texas/050625/2008	Swine	H1	N2	USA	NorthAmerica	2008
H1g1.5.1	CY045671	swine/Oklahoma/016179-9/2008	Swine	H1	N2	USA	NorthAmerica	2008
H1g1.5.1	CY045687	swine/Oklahoma/020734-3/2008	Swine	H1	N2	USA	NorthAmerica	2008
H1g1.5.1	CY045591	swine/Oklahoma/010226-16/2008	Swine	H1	N2	USA	NorthAmerica	2008
H1g1.5.1	CY045695	swine/Oklahoma/020736-2/2008	Swine	H1	N2	USA	NorthAmerica	2008
H1g1.5.1	CY045647	swine/Oklahoma/011521-5/2008	Swine	H1	N2	USA	NorthAmerica	2008
H1g1.5.1	CY045599	swine/Oklahoma/010226-17/2008	Swine	H1	N2	USA	NorthAmerica	2008
H1g1.5.1	CY045615	swine/Oklahoma/010710-8/2008	Swine	H1	N2	USA	NorthAmerica	2008
H1g1.5.1	CY045631	swine/Oklahoma/011289-10/2008	Swine	H1	N2	USA	NorthAmerica	2008
H1g1.5.1	CY045639	swine/Oklahoma/011289-8/2008	Swine	H1	N2	USA	NorthAmerica	2008
H1g1.5.1	CY045655	swine/Oklahoma/011521-4/2008	Swine	H1	N2	USA	NorthAmerica	2008
H1g1.5.1	CY045663	swine/Oklahoma/016179-8/2008	Swine	H1	N2	USA	NorthAmerica	2008
H1g1.5.1	CY045703	swine/Oklahoma/020736-1/2008	Swine	H1	N2	USA	NorthAmerica	2008
H1g1.5.1	CY045679	swine/Oklahoma/020734-2/2008	Swine	H1	N2	USA	NorthAmerica	2008
H1g1.5.1	CY045519	swine/Oklahoma/032726/2008	Swine	H1	N2	USA	NorthAmerica	2008
H1g1.5.1	CY045623	swine/Oklahoma/011289-9/2008	Swine	H1	N2	USA	NorthAmerica	2008
H1g1.5.1	CY045607	swine/Oklahoma/010710-9/2008	Swine	H1	N2	USA	NorthAmerica	2008
H1g1.5.2	CY045583	swine/Texas/008648/2008	Swine	H1	N2	USA	NorthAmerica	2008
H1g1.5.2	CY041903	swine/Minnesota/SG-00239/2007	Swine	H1	N2	USA	NorthAmerica	2007
H1g1.5.2	FJ638314	swine/IL/07003243/2007	Swine	H1	N2	USA	NorthAmerica	2007
H1g1.5.3	AJ457891	Dakar/11/97	Human	H1	N1	Senegal	Africa	1997
H1g1.5.3	AJ457897	Johannesburg/159/97	Human	H1	N1	SouthAfrica	Africa	1997
H1g1.5.3	AJ457874	Morocco/69/2001	Human	H1	N1	Morocco	Africa	2001
H1g1.5.3	AJ457887	Dakar/17/2000	Human	H1	N1	Senegal	Africa	2000
H1g1.5.3	AJ457893	Madagascar/57794/2000	Human	H1	N1	Madagascar	Africa	2000
H1g1.5.3	EF462564	SouthAfrica/42/2000	Human	H1	N1	SouthAfrica	Africa	2000
H1g1.5.3	EF462556	SouthAfrica/66/2000	Human	H1	N1	SouthAfrica	Africa	2000
H1g1.5.3	EF462565	SouthAfrica/65/2000	Human	H1	N1	SouthAfrica	Africa	2000
H1g1.5.3	AJ457871	Egypt/101/2001	Human	H1	N1	Egypt	Africa	2001
H1g1.5.3	AJ457875	Egypt/84/2001	Human	H1	N2	Egypt	Africa	2001
H1g1.5.3	AF503486	Egypt/21181/2001	Human	H1	N2	Egypt	Africa	2001
H1g1.5.3	AJ457876	Egypt/96/2002	Human	H1	N2	Egypt	Africa	2002
H1g1.5.3	DQ415318	TW/4845/99	Human	H1	N1	Taiwan	Asia	1999
H1g1.5.3	AB117166	Fukuoka/13/2001E	Human	H1	N1	Japan	Asia	2001
H1g1.5.3	AB117176	Tokushima/3/2002	Human	H1	N1	Japan	Asia	2002
H1g1.5.3	AB117169	Kitakyusyu/793/2001	Human	H1	N1	Japan	Asia	2001
H1g1.5.3	DQ249260	Taiwan/2985/2002	Human	H1	N1	Taiwan	Asia	2002
H1g1.5.3	AB117167	Gifu-C/9/2002	Human	H1	N1	Japan	Asia	2002
H1g1.5.3	AB117173	Okinawa/225/2002	Human	H1	N1	Japan	Asia	2002
H1g1.5.3	AY299494	Pusan/24/2002	Human	H1	N1	SouthKorea	Asia	2002
H1g1.5.3	AB117177	Yamaguchi/12/2002	Human	H1	N1	Japan	Asia	2002
H1g1.5.3	AB117171	Nagoya/32/2002	Human	H1	N1	Japan	Asia	2002
H1g1.5.3	AB117179	Yokohama/62/2002	Human	H1	N1	Japan	Asia	2002
H1g1.5.3	EU516329	HongKong/CUHK-13003/2002	Human	H1	N1	HongKong	Asia	2002
H1g1.5.3	AB117168	Iwate/33/2002	Human	H1	N1	Japan	Asia	2002
H1g1.5.3	AB117172	Nara/41/2002	Human	H1	N1	Japan	Asia	2002
H1g1.5.3	CY040154	Taiwan/123/2002	Human	H1	N1	Taiwan	Asia	2002
H1g1.5.3	AB117170	Kyoto-C/3/2002	Human	H1	N1	Japan	Asia	2002
H1g1.5.3	AB434099	Morioka/17/2002	Human	H1	N1	Japan	Asia	2002
H1g1.5.3	AB434103	Morioka/27/2002	Human	H1	N1	Japan	Asia	2002
H1g1.5.3	AB117175	Shiga/12/2002	Human	H1	N1	Japan	Asia	2002
H1g1.5.3	AY299501	Seoul/15/2002	Human	H1	N1	SouthKorea	Asia	2002
H1g1.5.3	AY299506	Chungbuk/50/2002	Human	H1	N1	SouthKorea	Asia	2002
H1g1.5.3	AY299504	Pusan/44/2002	Human	H1	N1	SouthKorea	Asia	2002
H1g1.5.3	AY297154	Chonnam/07/2002	Human	H1	N1	SouthKorea	Asia	2002
H1g1.5.3	AB117178	Yamanashi/1/2002	Human	H1	N1	Japan	Asia	2002
H1g1.5.3	AB117174	Sapporo/186/2002	Human	H1	N1	Japan	Asia	2002
H1g1.5.3	AY299495	Seoul/33/2002	Human	H1	N1	SouthKorea	Asia	2002
H1g1.5.3	CY040146	Taiwan/52/2002	Human	H1	N1	Taiwan	Asia	2002
H1g1.5.3	CY040074	Taiwan/567/2002	Human	H1	N1	Taiwan	Asia	2002
H1g1.5.3	AY299503	Pusan/22/2002	Human	H1	N1	SouthKorea	Asia	2002
H1g1.5.3	AY297157	Pusan/23/2002	Human	H1	N1	SouthKorea	Asia	2002
H1g1.5.3	AY299499	Gwangju/90/2002	Human	H1	N1	SouthKorea	Asia	2002
H1g1.5.3	AY299508	Gwangju/57/2002	Human	H1	N1	SouthKorea	Asia	2002
H1g1.5.3	AY299496	Pusan/45/2002	Human	H1	N1	SouthKorea	Asia	2002
H1g1.5.3	AY299497	Pusan/46/2002	Human	H1	N1	SouthKorea	Asia	2002
H1g1.5.3	AY297155	Seoul/11/2002	Human	H1	N1	SouthKorea	Asia	2002
H1g1.5.3	AY297156	Chonnam/18/2002	Human	H1	N1	SouthKorea	Asia	2002
H1g1.5.3	AY299500	Seoul/13/2002	Human	H1	N1	SouthKorea	Asia	2002
H1g1.5.3	AY299505	Pusan/47/2002	Human	H1	N1	SouthKorea	Asia	2002
H1g1.5.3	AY299507	Gwangju/55/2002	Human	H1	N1	SouthKorea	Asia	2002
H1g1.5.3	AY299498	Chonnam/51/2002	Human	H1	N1	SouthKorea	Asia	2002
H1g1.5.3	AY299502	Chonnam/19/2002	Human	H1	N1	SouthKorea	Asia	2002
H1g1.5.3	AY299509	Gwangju/58/2002	Human	H1	N1	SouthKorea	Asia	2002
H1g1.5.3	AB117217	Tokyo/62/1999E	Human	H1	N1	Japan	Asia	1999
H1g1.5.3	AJ457901	HongKong/59/94	Human	H1	N1	HongKong	Asia	1994
H1g1.5.3	AJ344022	Wuhan/371/95	Human	H1	N1	China	Asia	1995
H1g1.5.3	AJ457900	Beijing/262/95	Human	H1	N1	China	Asia	1995
H1g1.5.3	EF541421	Beijing/262/95	Human	H1	N1	China	Asia	1995
H1g1.5.3	AY180460	Quail/Nanchang/12-340/2000	Avian	H1	N1	China	Asia	2000
H1g1.5.3	AY289928	Beijing/262/95	Human	H1	N1	China	Asia	1995
H1g1.5.3	CY033614	Beijing/262/1995	Human	H1	N1	China	Asia	1995
H1g1.5.3	AJ457899	HongKong/52/95	Human	H1	N1	HongKong	Asia	1995
H1g1.5.3	CY016228	Nanchang/8/1996	Human	H1	N1	China	Asia	1996
H1g1.5.3	CY013837	Nanchang/17/1996	Human	H1	N1	China	Asia	1996
H1g1.5.3	CY013821	Nanchang/15/1996	Human	H1	N1	China	Asia	1996
H1g1.5.3	CY017011	Nanchang/14/1996	Human	H1	N1	China	Asia	1996
H1g1.5.3	CY013853	Nanchang/26/1996	Human	H1	N1	China	Asia	1996
H1g1.5.3	CY013829	Nanchang/16/1996	Human	H1	N1	China	Asia	1996
H1g1.5.3	CY016236	Nanchang/11/1996	Human	H1	N1	China	Asia	1996
H1g1.5.3	CY016244	Nanchang/23/1996	Human	H1	N1	China	Asia	1996
H1g1.5.3	CY013845	Nanchang/19/1996	Human	H1	N1	China	Asia	1996
H1g1.5.3	CY016052	Nanchang/21/1996	Human	H1	N1	China	Asia	1996
H1g1.5.3	CY017003	Nanchang/9/1996	Human	H1	N1	China	Asia	1996
H1g1.5.3	CY013813	Nanchang/13/1996	Human	H1	N1	China	Asia	1996
H1g1.5.3	CY016252	Nanchang/25/1996	Human	H1	N1	China	Asia	1996
H1g1.5.3	AB043500	Ibaraki/90/1998	Human	H1	N1	Japan	Asia	1998
H1g1.5.3	AB043494	Kamata/159/1997	Human	H1	N1	Japan	Asia	1997
H1g1.5.3	AJ457895	HongKong/470/97	Human	H1	N1	HongKong	Asia	1997
H1g1.5.3	AF386780	HongKong/1134/98	Human	H1	N1	HongKong	Asia	1998
H1g1.5.3	AF386781	HongKong/1134/98	Human	H1	N1	HongKong	Asia	1998
H1g1.5.3	AF386782	HongKong/1134/98	Human	H1	N1	HongKong	Asia	1998
H1g1.5.3	AF386779	HongKong/1035/98	Human	H1	N1	HongKong	Asia	1998
H1g1.5.3	AF386776	HongKong/1035/98	Human	H1	N1	HongKong	Asia	1998
H1g1.5.3	AF386778	HongKong/1035/98	Human	H1	N1	HongKong	Asia	1998
H1g1.5.3	AF386777	HongKong/1035/98	Human	H1	N1	HongKong	Asia	1998
H1g1.5.3	AJ457896	Singapore/15/96	Human	H1	N1	Singapore	Asia	1996
H1g1.5.3	AF386775	HongKong/1131/98	Human	H1	N1	HongKong	Asia	1998
H1g1.5.3	DQ415317	TW/3355/97	Human	H1	N1	Taiwan	Asia	1997
H1g1.5.3	AB043495	Yokohama/50/1998	Human	H1	N1	Japan	Asia	1998
H1g1.5.3	AB117221	Yokohama/50/1998	Human	H1	N1	Japan	Asia	1998
H1g1.5.3	AJ457890	Kanagawa/92/98	Human	H1	N1	Japan	Asia	1998
H1g1.5.3	AF503479	Oman/16353/2001	Human	H1	N2	Oman	Asia	2001
H1g1.5.3	AF503480	Singapore/73/2001	Human	H1	N2	Singapore	Asia	2001
H1g1.5.3	AF503481	Singapore/63/2001	Human	H1	N2	Singapore	Asia	2001
H1g1.5.3	AF503485	India/77308/2001	Human	H1	N2	India	Asia	2001
H1g1.5.3	AF503475	India/77251/2001	Human	H1	N2	India	Asia	2001
H1g1.5.3	AF503483	Singapore/66/2001	Human	H1	N2	Singapore	Asia	2001
H1g1.5.3	AB126622	Yokohama/22/2002	Human	H1	N2	Japan	Asia	2002
H1g1.5.3	AB126630	Yokohama/47/2002	Human	H1	N2	Japan	Asia	2002
H1g1.5.3	AF503478	India/77267/2001	Human	H1	N2	India	Asia	2001
H1g1.5.3	AF503477	India/77302/2001	Human	H1	N2	India	Asia	2001
H1g1.5.3	AB117194	Akita/161/1998	Human	H1	N1	Japan	Asia	1998
H1g1.5.3	AB117199	Ibaraki/66/1999	Human	H1	N1	Japan	Asia	1999
H1g1.5.3	AJ457878	Israel/6/2002	Human	H1	N2	Israel	Asia	2002
H1g1.5.3	AJ457879	SaudiArabia/13006/99	Human	H1	N1	SaudiArabia	Asia	1999
H1g1.5.3	DQ397950	Hiroshima/37/2001	Human	H1	N1	Japan	Asia	2001
H1g1.5.3	AJ457885	HongKong/4847/98	Human	H1	N1	HongKong	Asia	1998
H1g1.5.3	AJ457864	Tehran/49/2001	Human	H1	N1	Iran	Asia	2001
H1g1.5.3	AB117218	Yamagata/162/2000	Human	H1	N1	Japan	Asia	2000
H1g1.5.3	AF503474	India/66193/2001	Human	H1	N2	India	Asia	2001
H1g1.5.3	AB117165	Akita/86/2002	Human	H1	N1	Japan	Asia	2002
H1g1.5.3	AB117212	Okinawa/51/2000	Human	H1	N1	Japan	Asia	2000
H1g1.5.3	AB117211	Okinawa/159/2000	Human	H1	N1	Japan	Asia	2000
H1g1.5.3	FJ225987	Ningbo/18/2005	Human	H1	N1	China	Asia	2002
H1g1.5.3	EF568930	Thailand/Siriraj-07/2000	Human	H1	N1	Thailand	Asia	2000
H1g1.5.3	AB117184	Mie/1/2001	Human	H1	N1	Japan	Asia	2001
H1g1.5.3	AJ457910	SaudiArabia/2231/2001	Human	H1	N2	SaudiArabia	Asia	2001
H1g1.5.3	CY040138	Taiwan/5072/1999	Human	H1	N1	Taiwan	Asia	1999
H1g1.5.3	AB043496	Aichi/94/1999	Human	H1	N1	Japan	Asia	1999
H1g1.5.3	AB117208	Nagasaki/142/1999	Human	H1	N1	Japan	Asia	1999
H1g1.5.3	AB117205	Miyagi/4/2000	Human	H1	N1	Japan	Asia	2000
H1g1.5.3	AB117206	Miyagi/89/1999	Human	H1	N1	Japan	Asia	1999
H1g1.5.3	AB117215	Sendai-H/1544/1999	Human	H1	N1	Japan	Asia	1999
H1g1.5.3	AJ457862	SaudiArabia/7971/2000	Human	H1	N1	SaudiArabia	Asia	2000
H1g1.5.3	AB117181	Fukui/1/2001	Human	H1	N1	Japan	Asia	2001
H1g1.5.3	AJ457872	HongKong/747/2001	Human	H1	N1	HongKong	Asia	2001
H1g1.5.3	AB117185	Nagano/1101/2001	Human	H1	N1	Japan	Asia	2001
H1g1.5.3	AB117183	Kagawa/243/2001	Human	H1	N1	Japan	Asia	2001
H1g1.5.3	AB043498	Yokohama/12/2000	Human	H1	N1	Japan	Asia	2000
H1g1.5.3	AB117182	Iwate/1003/2001	Human	H1	N1	Japan	Asia	2001
H1g1.5.3	FJ794094	Daejeon/361/2008	Human	H1	N1	SouthKorea	Asia	2008
H1g1.5.3	AB117200	Ishikawa/42/1998E	Human	H1	N1	Japan	Asia	1998
H1g1.5.3	AB117189	Okayama/33/2001	Human	H1	N1	Japan	Asia	2001
H1g1.5.3	AB117186	Nagoya/26/2001	Human	H1	N1	Japan	Asia	2001
H1g1.5.3	AB117196	Chiba/1108/1999	Human	H1	N1	Japan	Asia	1999
H1g1.5.3	AB117188	Niigata/2756/2000	Human	H1	N1	Japan	Asia	2000
H1g1.5.3	AB117193	Shizuoka/761/2000	Human	H1	N1	Japan	Asia	2000
H1g1.5.3	AB117195	Chiba/1042/1999	Human	H1	N1	Japan	Asia	1999
H1g1.5.3	AB117198	Hiroshima/275/1999E	Human	H1	N1	Japan	Asia	1999
H1g1.5.3	AB117192	Shiga/16/2001E	Human	H1	N1	Japan	Asia	2001
H1g1.5.3	AB117190	Okayama/4/2001	Human	H1	N1	Japan	Asia	2001
H1g1.5.3	AB117191	Okinawa/18/2001	Human	H1	N1	Japan	Asia	2001
H1g1.5.3	AB117209	Nagoya/16/2000	Human	H1	N1	Japan	Asia	2000
H1g1.5.3	AJ457880	HongKong/2070/99	Human	H1	N1	HongKong	Asia	1999
H1g1.5.3	AB043497	Aichi/102/1999	Human	H1	N1	Japan	Asia	1999
H1g1.5.3	AB117201	Kagawa/8/2000	Human	H1	N1	Japan	Asia	2000
H1g1.5.3	AB117202	Kagawa/83/2000	Human	H1	N1	Japan	Asia	2000
H1g1.5.3	AB117187	Nara/13/2001	Human	H1	N1	Japan	Asia	2001
H1g1.5.3	AB117203	Kagoshima/80/2000	Human	H1	N1	Japan	Asia	2000
H1g1.5.3	AB117180	Ehime/1/2001	Human	H1	N1	Japan	Asia	2001
H1g1.5.3	AB117214	Sapporo/174/2000	Human	H1	N1	Japan	Asia	2000
H1g1.5.3	AB117213	Osaka/972/2000	Human	H1	N1	Japan	Asia	2000
H1g1.5.3	AY029292	Misawa/1226/00	Human	H1	N1	Japan	Asia	2000
H1g1.5.3	AJ457898	Ostrava/801/98	Human	H1	N1	CzechRepublic	Europe	1998
H1g1.5.3	AJ457892	Paris/1857/98	Human	H1	N1	France	Europe	1998
H1g1.5.3	AJ457894	Moscow/17/98	Human	H1	N1	Russia	Europe	1998
H1g1.5.3	AJ457873	Iceland/57/2001	Human	H1	N1	Iceland	Europe	2001
H1g1.5.3	AJ517814	Switzerland/5773/2001	Human	H1	N1	Switzerland	Europe	2001
H1g1.5.3	AJ457870	Trieste/21/2001	Human	H1	N1	Italy	Europe	2001
H1g1.5.3	DQ986134	Paris/1694/01	Human	H1	N1	France	Europe	2001
H1g1.5.3	EU097941	Denmark/36/2001	Human	H1	N1	Denmark	Europe	2001
H1g1.5.3	EU097942	Denmark/40/2000	Human	H1	N1	Denmark	Europe	2000
H1g1.5.3	EU097940	Denmark/20/2001	Human	H1	N1	Denmark	Europe	2001
H1g1.5.3	AJ457867	Greece/204/2001	Human	H1	N1	Greece	Europe	2001
H1g1.5.3	AJ457869	Hannover/71/2001	Human	H1	N1	Germany	Europe	2001
H1g1.5.3	AJ457886	Madrid/1082/2001	Human	H1	N1	Spain	Europe	2001
H1g1.5.3	AJ457888	Switzerland/5684/2001	Human	H1	N1	Switzerland	Europe	2001
H1g1.5.3	EF670505	Oslo/847/2001	Human	H1	N1	Norway	Europe	2001
H1g1.5.3	EF670504	Oslo/739/2001	Human	H1	N1	Norway	Europe	2001
H1g1.5.3	EF670506	Oslo/826/2001	Human	H1	N1	Norway	Europe	2001
H1g1.5.3	EF670503	Oslo/971/2001	Human	H1	N1	Norway	Europe	2001
H1g1.5.3	EU097959	Denmark/86/2003	Human	H1	N2	Denmark	Europe	2003
H1g1.5.3	AJ457881	Vladimir/16/2001	Human	H1	N1	Russia	Europe	2001
H1g1.5.3	AJ457883	Kalingrad/5/2000	Human	H1	N1	Russia	Europe	2000
H1g1.5.3	AJ489852	England/161/02	Human	H1	N1	UnitedKingdom	Europe	2002
H1g1.5.3	AJ457882	Umea/1/2000	Human	H1	N1	Sweden	Europe	2000
H1g1.5.3	EF670515	Oslo/866/2001	Human	H1	N1	Norway	Europe	2001
H1g1.5.3	EU097934	Denmark/3/2001	Human	H1	N1	Denmark	Europe	2001
H1g1.5.3	EU097936	Denmark/11/2001	Human	H1	N1	Denmark	Europe	2001
H1g1.5.3	EU097938	Denmark/16/2001	Human	H1	N1	Denmark	Europe	2001
H1g1.5.3	EF670509	Oslo/868/2001	Human	H1	N1	Norway	Europe	2001
H1g1.5.3	EF670519	Oslo/1167/2001	Human	H1	N1	Norway	Europe	2001
H1g1.5.3	AJ457877	Madrid/1216/2002	Human	H1	N1	Spain	Europe	2002
H1g1.5.3	EF670518	Oslo/1019/2001	Human	H1	N1	Norway	Europe	2001
H1g1.5.3	EF670513	Oslo/2289/2001	Human	H1	N1	Norway	Europe	2001
H1g1.5.3	EF670512	Oslo/1512/2001	Human	H1	N1	Norway	Europe	2001
H1g1.5.3	AJ457930	Ireland/649/2002	Human	H1	N1	Ireland	Europe	2002
H1g1.5.3	AJ457866	Latvia/2524/2001	Human	H1	N1	Latvia	Europe	2001
H1g1.5.3	EF670516	Oslo/2292/2001	Human	H1	N1	Norway	Europe	2001
H1g1.5.3	EF670517	Oslo/2298/2001	Human	H1	N1	Norway	Europe	2001
H1g1.5.3	EF670510	Oslo/869/2001	Human	H1	N1	Norway	Europe	2001
H1g1.5.3	EF670511	Oslo/791/2001	Human	H1	N1	Norway	Europe	2001
H1g1.5.3	AJ489854	Scotland/122/01	Human	H1	N2	UnitedKingdom	Europe	2001
H1g1.5.3	AJ457861	Latvia/686/2002	Human	H1	N2	Latvia	Europe	2002
H1g1.5.3	AJ457911	England/2/2002	Human	H1	N2	UnitedKingdom	Europe	2002
H1g1.5.3	AJ489853	England/627/01	Human	H1	N2	UnitedKingdom	Europe	2001
H1g1.5.3	AJ489857	England/18/02	Human	H1	N2	UnitedKingdom	Europe	2002
H1g1.5.3	AJ489860	576/01	Human	H1	N2	UnitedKingdom	Europe	2001
H1g1.5.3	AJ489855	England/689/01	Human	H1	N2	UnitedKingdom	Europe	2001
H1g1.5.3	AJ489856	England/691/01	Human	H1	N2	UnitedKingdom	Europe	2001
H1g1.5.3	AJ489858	England/15/02	Human	H1	N2	UnitedKingdom	Europe	2002
H1g1.5.3	AJ489859	575/01	Human	H1	N2	UnitedKingdom	Europe	2001
H1g1.5.3	AJ489861	1352/02	Human	H1	N2	UnitedKingdom	Europe	2002
H1g1.5.3	AJ489862	1660/02	Human	H1	N2	UnitedKingdom	Europe	2002
H1g1.5.3	AJ457909	Stockholm/13/2002	Human	H1	N2	Sweden	Europe	2002
H1g1.5.3	FJ231786	Sachsen/2005.03.02/2002	Human	H1	N2	Germany	Europe	2002
H1g1.5.3	FJ231787	Sachsen/11.03.02/2002	Human	H1	N2	Germany	Europe	2002
H1g1.5.3	FJ231790	Rheinland-Pfalz/34/2003	Human	H1	N2	Germany	Europe	2003
H1g1.5.3	FJ231791	Sachsen/678/2003	Human	H1	N2	Germany	Europe	2003
H1g1.5.3	EU097962	Denmark/50/2003	Human	H1	N2	Denmark	Europe	2003
H1g1.5.3	EU097960	Denmark/56/2003	Human	H1	N2	Denmark	Europe	2003
H1g1.5.3	EU097961	Denmark/12/2003	Human	H1	N2	Denmark	Europe	2003
H1g1.5.3	FJ231789	Baden-Wuerttemberg/129/2003	Human	H1	N2	Germany	Europe	2003
H1g1.5.3	FJ231788	Baden-Wuerttemberg/20/2003	Human	H1	N2	Germany	Europe	2003
H1g1.5.3	DQ280236	swine/Ontario/48235/04	Swine	H1	N2	Canada	NorthAmerica	2004
H1g1.5.3	DQ280212	swine/Ontario/55383/04	Swine	H1	N2	Canada	NorthAmerica	2004
H1g1.5.3	CY006675	NewYork/494/2002	Human	H1	N1	USA	NorthAmerica	2002
H1g1.5.3	CY016333	RhodeIsland/1/2003	Human	H1	N1	USA	NorthAmerica	2003
H1g1.5.3	CY020261	Memphis/1/2001	Human	H1	N1	USA	NorthAmerica	2001
H1g1.5.3	CY020141	Memphis/6/2001	Human	H1	N1	USA	NorthAmerica	2001
H1g1.5.3	CY020149	Memphis/7/2001	Human	H1	N1	USA	NorthAmerica	2001
H1g1.5.3	CY002640	NewYork/233/2000	Human	H1	N1	USA	NorthAmerica	2000
H1g1.5.3	AY682833	Charlottesville/6/2001	Human	H1	N1	USA	NorthAmerica	2001
H1g1.5.3	CY003312	NewYork/302/2001	Human	H1	N1	USA	NorthAmerica	2001
H1g1.5.3	CY003392	NewYork/305/2001	Human	H1	N1	USA	NorthAmerica	2001
H1g1.5.3	CY006419	NewYork/212/2001	Human	H1	N1	USA	NorthAmerica	2001
H1g1.5.3	CY003400	NewYork/306/2001	Human	H1	N1	USA	NorthAmerica	2001
H1g1.5.3	CY003288	NewYork/444/2001	Human	H1	N1	USA	NorthAmerica	2001
H1g1.5.3	CY006363	NewYork/303/2001	Human	H1	N1	USA	NorthAmerica	2001
H1g1.5.3	CY002616	NewYork/208/2001	Human	H1	N1	USA	NorthAmerica	2001
H1g1.5.3	CY019875	Memphis/8/2001	Human	H1	N1	USA	NorthAmerica	2001
H1g1.5.3	CY002400	NewYork/345/2001	Human	H1	N1	USA	NorthAmerica	2001
H1g1.5.3	CY003016	NewYork/246/2001	Human	H1	N1	USA	NorthAmerica	2001
H1g1.5.3	CY002800	NewYork/308/2001	Human	H1	N1	USA	NorthAmerica	2001
H1g1.5.3	CY003328	NewYork/346/2001	Human	H1	N1	USA	NorthAmerica	2001
H1g1.5.3	CY010852	NewYork/235/2001	Human	H1	N1	USA	NorthAmerica	2001
H1g1.5.3	CY003320	NewYork/342/2001	Human	H1	N1	USA	NorthAmerica	2001
H1g1.5.3	CY006875	NewYork/309/2001	Human	H1	N1	USA	NorthAmerica	2001
H1g1.5.3	CY003008	NewYork/241/2001	Human	H1	N1	USA	NorthAmerica	2001
H1g1.5.3	CY006779	NewYork/344/2001	Human	H1	N1	USA	NorthAmerica	2001
H1g1.5.3	CY006355	NewYork/242/2001	Human	H1	N1	USA	NorthAmerica	2001
H1g1.5.3	CY003480	NewYork/446/2001	Human	H1	N1	USA	NorthAmerica	2001
H1g1.5.3	CY003024	NewYork/341/2001	Human	H1	N1	USA	NorthAmerica	2001
H1g1.5.3	CY003833	NewYork/445/2001	Human	H1	N1	USA	NorthAmerica	2001
H1g1.5.3	CY006171	NewYork/447/2001	Human	H1	N1	USA	NorthAmerica	2001
H1g1.5.3	CY002648	NewYork/234/2000	Human	H1	N1	USA	NorthAmerica	2000
H1g1.5.3	CY001952	NewYork/205/2001	Human	H1	N1	USA	NorthAmerica	2001
H1g1.5.3	CY002568	NewYork/281/2001	Human	H1	N1	USA	NorthAmerica	2001
H1g1.5.3	CY002696	NewYork/312/2001	Human	H1	N1	USA	NorthAmerica	2001
H1g1.5.3	CY003464	NewYork/442/2001	Human	H1	N1	USA	NorthAmerica	2001
H1g1.5.3	CY002392	NewYork/343/2001	Human	H1	N1	USA	NorthAmerica	2001
H1g1.5.3	CY006195	NewYork/497/2003	Human	H1	N1	USA	NorthAmerica	2003
H1g1.5.3	CY021693	Memphis/15/2000	Human	H1	N1	USA	NorthAmerica	2000
H1g1.5.3	CY009236	NewYork/441/2001	Human	H1	N1	USA	NorthAmerica	2001
H1g1.5.3	CY002672	NewYork/310/2001	Human	H1	N1	USA	NorthAmerica	2001
H1g1.5.3	CY003000	NewYork/239/2001	Human	H1	N1	USA	NorthAmerica	2001
H1g1.5.3	AY029290	Hawaii/1313/00	Human	H1	N1	USA	NorthAmerica	2000
H1g1.5.3	AY029289	Hawaii/3948/00	Human	H1	N1	USA	NorthAmerica	2000
H1g1.5.3	CY003472	NewYork/443/2001	Human	H1	N1	USA	NorthAmerica	2001
H1g1.5.3	AY029291	NewJersey/313/00	Human	H1	N1	USA	NorthAmerica	2000
H1g1.5.3	AY029287	Alaska/1173/00	Human	H1	N1	USA	NorthAmerica	2000
H1g1.5.3	AY029288	Florida/904/00	Human	H1	N1	USA	NorthAmerica	2000
H1g1.5.3	CY003304	NewYork/291/2002	Human	H1	N1	USA	NorthAmerica	2002
H1g1.5.3	CY016347	Virginia/20/2003	Human	H1	N1	USA	NorthAmerica	2003
H1g1.5.3	CY016322	Alabama/1/2003	Human	H1	N2	USA	NorthAmerica	2003
H1g1.5.3	CY003769	NewYork/417/2002	Human	H1	N2	USA	NorthAmerica	2002
H1g1.5.3	CY001680	NewYork/78/2002	Human	H1	N2	USA	NorthAmerica	2002
H1g1.5.3	CY016312	Pennsylvania/1/2003	Human	H1	N2	USA	NorthAmerica	2003
H1g1.5.3	CY006387	NewYork/481/2003	Human	H1	N2	USA	NorthAmerica	2003
H1g1.5.3	CY016311	NewYork/2/2003	Human	H1	N2	USA	NorthAmerica	2003
H1g1.5.3	CY016319	Georgia/2/2003	Human	H1	N2	USA	NorthAmerica	2003
H1g1.5.3	CY003696	NewYork/489/2003	Human	H1	N2	USA	NorthAmerica	2003
H1g1.5.3	CY006395	NewYork/487/2003	Human	H1	N2	USA	NorthAmerica	2003
H1g1.5.3	CY016336	NewJersey/3/2003	Human	H1	N1	USA	NorthAmerica	2003
H1g1.5.3	DQ280227	swine/Ontario/52156/03	Swine	H1	N2	Canada	NorthAmerica	2003
H1g1.5.3	CY016326	Michigan/3/2003	Human	H1	N2	USA	NorthAmerica	2003
H1g1.5.3	CY002152	NewYork/296/2003	Human	H1	N2	USA	NorthAmerica	2003
H1g1.5.3	CY002664	NewYork/297/2003	Human	H1	N2	USA	NorthAmerica	2003
H1g1.5.3	CY006107	NewYork/219/2003	Human	H1	N2	USA	NorthAmerica	2003
H1g1.5.3	CY016345	Hawaii/6/2003	Human	H1	N1	USA	NorthAmerica	2003
H1g1.5.3	CY016334	NewYork/24/2003	Human	H1	N1	USA	NorthAmerica	2003
H1g1.5.3	CY006747	NewYork/225/2003	Human	H1	N2	USA	NorthAmerica	2003
H1g1.5.3	CY006187	NewYork/491/2003	Human	H1	N2	USA	NorthAmerica	2003
H1g1.5.3	CY002360	NewYork/300/2003	Human	H1	N2	USA	NorthAmerica	2003
H1g1.5.3	CY006411	NewYork/492/2003	Human	H1	N2	USA	NorthAmerica	2003
H1g1.5.3	CY006867	NewYork/211/2003	Human	H1	N2	USA	NorthAmerica	2003
H1g1.5.3	CY003672	NewYork/482/2003	Human	H1	N2	USA	NorthAmerica	2003
H1g1.5.3	CY016324	Michigan/2/2003	Human	H1	N2	USA	NorthAmerica	2003
H1g1.5.3	CY006403	NewYork/490/2003	Human	H1	N2	USA	NorthAmerica	2003
H1g1.5.3	CY017115	NewYork/C1/2003	Human	H1	N2	USA	NorthAmerica	2003
H1g1.5.3	CY003761	NewYork/400/2003	Human	H1	N2	USA	NorthAmerica	2003
H1g1.5.3	CY010076	NewYork/229/2003	Human	H1	N2	USA	NorthAmerica	2003
H1g1.5.3	CY002632	NewYork/231/2003	Human	H1	N2	USA	NorthAmerica	2003
H1g1.5.3	CY002352	NewYork/209/2003	Human	H1	N2	USA	NorthAmerica	2003
H1g1.5.3	CY003368	NewYork/217/2002	Human	H1	N2	USA	NorthAmerica	2002
H1g1.5.3	CY002656	NewYork/294/2003	Human	H1	N2	USA	NorthAmerica	2003
H1g1.5.3	CY002992	NewYork/226/2003	Human	H1	N2	USA	NorthAmerica	2003
H1g1.5.3	CY016309	NewYork/3/2003	Human	H1	N2	USA	NorthAmerica	2003
H1g1.5.3	CY016343	Wyoming/14/2003	Human	H1	N1	USA	NorthAmerica	2003
H1g1.5.3	AF503484	Nevada/5/2001	Human	H1	N2	USA	NorthAmerica	2001
H1g1.5.3	AF503476	Texas/7/2001	Human	H1	N2	USA	NorthAmerica	2001
H1g1.5.3	AF503473	Wisconsin/12/2001	Human	H1	N2	USA	NorthAmerica	2001
H1g1.5.3	AF503482	Canada/4/2001	Human	H1	N2	Canada	NorthAmerica	2001
H1g1.5.3	AY684125	Wisconsin/12/2001	Human	H1	N2	USA	NorthAmerica	2001
H1g1.5.3	CY010100	Canterbury/27/2000	Human	H1	N1	NewZealand	Oceania	2000
H1g1.5.3	CY010388	Canterbury/63/2000	Human	H1	N1	NewZealand	Oceania	2000
H1g1.5.3	CY016563	NewSouthWales/30/2000	Human	H1	N1	Australia	Oceania	2000
H1g1.5.3	CY022157	Auckland/580/2000	Human	H1	N1	NewZealand	Oceania	2000
H1g1.5.3	CY016260	NewSouthWales/26/2000	Human	H1	N1	Australia	Oceania	2000
H1g1.5.3	CY009860	Canterbury/08/2001	Human	H1	N1	NewZealand	Oceania	2001
H1g1.5.3	CY010324	Canterbury/126/2001	Human	H1	N1	NewZealand	Oceania	2001
H1g1.5.3	CY010212	Canterbury/30/2001	Human	H1	N1	NewZealand	Oceania	2001
H1g1.5.3	CY016435	Waikato/92/2001	Human	H1	N1	NewZealand	Oceania	2001
H1g1.5.3	CY010300	Canterbury/73/2001	Human	H1	N1	NewZealand	Oceania	2001
H1g1.5.3	CY010452	Canterbury/70/2001	Human	H1	N1	NewZealand	Oceania	2001
H1g1.5.3	CY010148	Canterbury/17/2001	Human	H1	N1	NewZealand	Oceania	2001
H1g1.5.3	CY010468	Canterbury/79/2001	Human	H1	N1	NewZealand	Oceania	2001
H1g1.5.3	CY011088	Canterbury/152/2001	Human	H1	N1	NewZealand	Oceania	2001
H1g1.5.3	CY022541	Auckland/606/2001	Human	H1	N1	NewZealand	Oceania	2001
H1g1.5.3	CY019205	Canterbury/05/2001	Human	H1	N1	NewZealand	Oceania	2001
H1g1.5.3	CY009972	Canterbury/76/2001	Human	H1	N1	NewZealand	Oceania	2001
H1g1.5.3	CY010156	Canterbury/19/2001	Human	H1	N1	NewZealand	Oceania	2001
H1g1.5.3	CY010180	Canterbury/24/2001	Human	H1	N1	NewZealand	Oceania	2001
H1g1.5.3	CY010244	Canterbury/45/2001	Human	H1	N1	NewZealand	Oceania	2001
H1g1.5.3	CY010356	SouthCanterbury/159/2001	Human	H1	N1	NewZealand	Oceania	2001
H1g1.5.3	CY010460	Canterbury/71/2001	Human	H1	N1	NewZealand	Oceania	2001
H1g1.5.3	CY010260	Canterbury/48/2001	Human	H1	N1	NewZealand	Oceania	2001
H1g1.5.3	CY010428	Canterbury/65/2001	Human	H1	N1	NewZealand	Oceania	2001
H1g1.5.3	CY011408	Canterbury/26/2001	Human	H1	N1	NewZealand	Oceania	2001
H1g1.5.3	CY010252	Canterbury/47/2001	Human	H1	N1	NewZealand	Oceania	2001
H1g1.5.3	CY011080	Canterbury/60/2001	Human	H1	N1	NewZealand	Oceania	2001
H1g1.5.3	CY010412	Canterbury/51/2001	Human	H1	N1	NewZealand	Oceania	2001
H1g1.5.3	CY019923	WesternAustralia/20/2001	Human	H1	N1	Australia	Oceania	2001
H1g1.5.3	CY011200	Waikato/20/2001	Human	H1	N1	NewZealand	Oceania	2001
H1g1.5.3	CY011208	Waikato/18/2001	Human	H1	N1	NewZealand	Oceania	2001
H1g1.5.3	CY009980	Canterbury/153/2001	Human	H1	N1	NewZealand	Oceania	2001
H1g1.5.3	CY010172	Canterbury/23/2001	Human	H1	N1	NewZealand	Oceania	2001
H1g1.5.3	CY011232	Waikato/42/2001	Human	H1	N1	NewZealand	Oceania	2001
H1g1.5.3	CY010444	Canterbury/69/2001	Human	H1	N1	NewZealand	Oceania	2001
H1g1.5.3	CY010772	Canterbury/22/2001	Human	H1	N1	NewZealand	Oceania	2001
H1g1.5.3	CY009868	SouthCanterbury/15/2001	Human	H1	N1	NewZealand	Oceania	2001
H1g1.5.3	CY009876	Canterbury/16/2001	Human	H1	N1	NewZealand	Oceania	2001
H1g1.5.3	CY010332	Canterbury/139/2001	Human	H1	N1	NewZealand	Oceania	2001
H1g1.5.3	CY010340	Canterbury/144/2001	Human	H1	N1	NewZealand	Oceania	2001
H1g1.5.3	CY010436	Canterbury/68/2001	Human	H1	N1	NewZealand	Oceania	2001
H1g1.5.3	CY010764	Canterbury/20/2001	Human	H1	N1	NewZealand	Oceania	2001
H1g1.5.3	CY011184	Waikato/10/2001	Human	H1	N1	NewZealand	Oceania	2001
H1g1.5.3	CY011216	Wellington/9/2001	Human	H1	N1	NewZealand	Oceania	2001
H1g1.5.3	CY009956	Canterbury/66/2001	Human	H1	N1	NewZealand	Oceania	2001
H1g1.5.3	CY010204	Canterbury/29/2001	Human	H1	N1	NewZealand	Oceania	2001
H1g1.5.3	CY010284	Canterbury/64/2001	Human	H1	N1	NewZealand	Oceania	2001
H1g1.5.3	CY010292	Canterbury/72/2001	Human	H1	N1	NewZealand	Oceania	2001
H1g1.5.3	CY010780	Canterbury/42/2001	Human	H1	N1	NewZealand	Oceania	2001
H1g1.5.3	CY011192	Waikato/16/2001	Human	H1	N1	NewZealand	Oceania	2001
H1g1.5.3	CY011240	Wellington/28/2001	Human	H1	N1	NewZealand	Oceania	2001
H1g1.5.3	CY020277	WesternAustralia/19/2001	Human	H1	N1	Australia	Oceania	2001
H1g1.5.3	CY010196	Canterbury/27/2001	Human	H1	N1	NewZealand	Oceania	2001
H1g1.5.3	CY010236	Canterbury/40/2001	Human	H1	N1	NewZealand	Oceania	2001
H1g1.5.3	CY010476	Canterbury/106/2001	Human	H1	N1	NewZealand	Oceania	2001
H1g1.5.3	CY010556	Canterbury/54/2001	Human	H1	N1	NewZealand	Oceania	2001
H1g1.5.3	CY010316	Canterbury/125/2001	Human	H1	N1	NewZealand	Oceania	2001
H1g1.5.3	CY010228	Canterbury/35/2001	Human	H1	N1	NewZealand	Oceania	2001
H1g1.5.3	CY010188	Canterbury/25/2001	Human	H1	N1	NewZealand	Oceania	2001
H1g1.5.3	CY010164	Canterbury/21/2001	Human	H1	N1	NewZealand	Oceania	2001
H1g1.5.3	CY009964	Canterbury/74/2001	Human	H1	N1	NewZealand	Oceania	2001
H1g1.5.3	CY009884	Canterbury/41/2001	Human	H1	N1	NewZealand	Oceania	2001
H1g1.5.3	CY010276	Canterbury/58/2001	Human	H1	N1	NewZealand	Oceania	2001
H1g1.5.3	CY010420	Canterbury/63/2001	Human	H1	N1	NewZealand	Oceania	2001
H1g1.5.3	CY010220	Canterbury/34/2001	Human	H1	N1	NewZealand	Oceania	2001
H1g1.5.3	CY011072	WestCoast/31/2001	Human	H1	N1	NewZealand	Oceania	2001
H1g1.5.3	CY011160	Waikato/4/2001	Human	H1	N1	NewZealand	Oceania	2001
H1g1.5.3	CY011600	Waikato/3/2001	Human	H1	N1	NewZealand	Oceania	2001
H1g1.5.3	CY012304	Wellington/17/2001	Human	H1	N1	NewZealand	Oceania	2001
H1g1.5.3	CY011168	Waikato/7/2001	Human	H1	N1	NewZealand	Oceania	2001
H1g1.5.3	CY011176	Wellington/3/2001	Human	H1	N1	NewZealand	Oceania	2001
H1g1.5.3	CY020429	WesternAustralia/22/2001	Human	H1	N1	Australia	Oceania	2001
H1g1.5.3	CY020421	WesternAustralia/21/2001	Human	H1	N1	Australia	Oceania	2001
H1g1.5.3	CY011224	Waikato/51/2001	Human	H1	N1	NewZealand	Oceania	2001
H1g1.5.3	CY011608	Wellington/32/2001	Human	H1	N1	NewZealand	Oceania	2001
H1g1.5.3	CY010348	Canterbury/155/2001	Human	H1	N1	NewZealand	Oceania	2001
H1g1.5.3	CY011392	Waikato/80/2001	Human	H1	N1	NewZealand	Oceania	2001
H1g1.5.3	CY010404	WestCoast/33/2001	Human	H1	N1	NewZealand	Oceania	2001
H1g1.5.3	CY022533	Auckland/605/2001	Human	H1	N1	NewZealand	Oceania	2001
H1g1.5.3	CY020269	WesternAustralia/18/2001	Human	H1	N1	Australia	Oceania	2001
H1g1.5.3	CY010308	Canterbury/119/2001	Human	H1	N1	NewZealand	Oceania	2001
H1g1.5.3	CY010396	Canterbury/01/2001	Human	H1	N1	NewZealand	Oceania	2001
H1g1.5.3	CY010268	Canterbury/53/2001	Human	H1	N1	NewZealand	Oceania	2001
H1g1.5.3	CY011152	Wellington/1/2001	Human	H1	N1	NewZealand	Oceania	2001
H1g1.5.3	AJ457884	Auckland/176/99	Human	H1	N1	NewZealand	Oceania	1999
H1g1.5.3	CY016643	NewSouthWales/18/1999	Human	H1	N1	Australia	Oceania	1999
H1g1.5.3	CY017123	NewSouthWales/24/1999	Human	H1	N1	Australia	Oceania	1999
H1g1.5.3	AJ344014	NewCaledonia/20/99	Human	H1	N1	NewCaledonia	Oceania	1999
H1g1.5.3	CY031336	NewCaledonia/20/1999	Human	H1	N1	NewCaledonia	Oceania	1999
H1g1.5.3	AY289929	NewCaledonia/20/99	Human	H1	N1	NewCaledonia	Oceania	1999
H1g1.5.3	CY033622	NewCaledonia/20/1999	Human	H1	N1	NewCaledonia	Oceania	1999
H1g1.5.3	DQ508857	NewCaledonia/20/1999	Human	H1	N1	NewCaledonia	Oceania	1999
H1g1.5.3	EU103824	NewCaledonia/20/1999	Human	H1	N1	NewCaledonia	Oceania	1999
H1g1.5.3	CY011584	Dunedin/2/2000	Human	H1	N1	NewZealand	Oceania	2000
H1g1.5.3	CY010140	Canterbury/95/2000	Human	H1	N1	NewZealand	Oceania	2000
H1g1.5.3	CY023010	Auckland/591/2000	Human	H1	N1	NewZealand	Oceania	2000
H1g1.5.3	CY011952	Waikato/19/2000	Human	H1	N1	NewZealand	Oceania	2000
H1g1.5.3	CY013040	Waikato/18/2000	Human	H1	N1	NewZealand	Oceania	2000
H1g1.5.3	CY025034	Auckland/597/2000	Human	H1	N1	NewZealand	Oceania	2000
H1g1.5.3	CY009940	Canterbury/9/2000	Human	H1	N1	NewZealand	Oceania	2000
H1g1.5.3	CY012608	Wellington/16/2000	Human	H1	N1	NewZealand	Oceania	2000
H1g1.5.3	CY010092	Canterbury/43/2000	Human	H1	N1	NewZealand	Oceania	2000
H1g1.5.3	CY009844	Canterbury/57/2000	Human	H1	N1	NewZealand	Oceania	2000
H1g1.5.3	CY010380	Canterbury/8/2000	Human	H1	N1	NewZealand	Oceania	2000
H1g1.5.3	CY022173	Auckland/582/2000	Human	H1	N1	NewZealand	Oceania	2000
H1g1.5.3	CY023018	Auckland/595/2000	Human	H1	N1	NewZealand	Oceania	2000
H1g1.5.3	CY016196	Wellington/14/2000	Human	H1	N1	NewZealand	Oceania	2000
H1g1.5.3	CY009796	Canterbury/79/2000	Human	H1	N1	NewZealand	Oceania	2000
H1g1.5.3	CY025026	Auckland/584/2000	Human	H1	N1	NewZealand	Oceania	2000
H1g1.5.3	CY013032	Wellington/18/2000	Human	H1	N1	NewZealand	Oceania	2000
H1g1.5.3	CY026155	Auckland/585/2000	Human	H1	N1	NewZealand	Oceania	2000
H1g1.5.3	CY011012	Wellington/5/2000	Human	H1	N1	NewZealand	Oceania	2000
H1g1.5.3	CY009788	Canterbury/76/2000	Human	H1	N1	NewZealand	Oceania	2000
H1g1.5.3	CY009756	Canterbury/23/2000	Human	H1	N1	NewZealand	Oceania	2000
H1g1.5.3	CY009764	Canterbury/7/2000	Human	H1	N1	NewZealand	Oceania	2000
H1g1.5.3	CY009180	Canterbury/30/2000	Human	H1	N1	NewZealand	Oceania	2000
H1g1.5.3	CY009228	Canterbury/34/2000	Human	H1	N1	NewZealand	Oceania	2000
H1g1.5.3	CY009548	Canterbury/65/2000	Human	H1	N1	NewZealand	Oceania	2000
H1g1.5.3	CY010124	Canterbury/54/2000	Human	H1	N1	NewZealand	Oceania	2000
H1g1.5.3	CY011784	Canterbury/55/2000	Human	H1	N1	NewZealand	Oceania	2000
H1g1.5.3	CY010116	Canterbury/58/2000	Human	H1	N1	NewZealand	Oceania	2000
H1g1.5.3	CY009532	Canterbury/37/2000	Human	H1	N1	NewZealand	Oceania	2000
H1g1.5.3	CY009188	Canterbury/28/2000	Human	H1	N1	NewZealand	Oceania	2000
H1g1.5.3	CY009212	Canterbury/33/2000	Human	H1	N1	NewZealand	Oceania	2000
H1g1.5.3	CY009220	Canterbury/32/2000	Human	H1	N1	NewZealand	Oceania	2000
H1g1.5.3	CY009820	Canterbury/60/2000	Human	H1	N1	NewZealand	Oceania	2000
H1g1.5.3	CY009828	Canterbury/41/2000	Human	H1	N1	NewZealand	Oceania	2000
H1g1.5.3	CY010108	Canterbury/51/2000	Human	H1	N1	NewZealand	Oceania	2000
H1g1.5.3	CY022165	Auckland/581/2000	Human	H1	N1	NewZealand	Oceania	2000
H1g1.5.3	CY012600	Wellington/11/2000	Human	H1	N1	NewZealand	Oceania	2000
H1g1.5.3	CY020509	Wellington/6/2000	Human	H1	N1	NewZealand	Oceania	2000
H1g1.5.3	CY009804	Canterbury/87/2000	Human	H1	N1	NewZealand	Oceania	2000
H1g1.5.3	CY022493	Auckland/587/2000	Human	H1	N1	NewZealand	Oceania	2000
H1g1.5.3	CY022509	Auckland/590/2000	Human	H1	N1	NewZealand	Oceania	2000
H1g1.5.3	CY011004	Wellington/3/2000	Human	H1	N1	NewZealand	Oceania	2000
H1g1.5.3	CY009772	SouthCanterbury/31/2000	Human	H1	N1	NewZealand	Oceania	2000
H1g1.5.3	CY009204	SouthCanterbury/35/2000	Human	H1	N1	NewZealand	Oceania	2000
H1g1.5.3	CY009540	Canterbury/5/2000	Human	H1	N1	NewZealand	Oceania	2000
H1g1.5.3	CY022485	Auckland/586/2000	Human	H1	N1	NewZealand	Oceania	2000
H1g1.5.3	CY022149	Auckland/579/2000	Human	H1	N1	NewZealand	Oceania	2000
H1g1.5.3	CY021629	Wellington/4/2000	Human	H1	N1	NewZealand	Oceania	2000
H1g1.5.3	CY012296	Wellington/7/2000	Human	H1	N1	NewZealand	Oceania	2000
H1g1.5.3	CY011776	Canterbury/48/2000	Human	H1	N1	NewZealand	Oceania	2000
H1g1.5.3	CY010996	Wellington/2/2000	Human	H1	N1	NewZealand	Oceania	2000
H1g1.5.3	CY010132	Canterbury/100/2000	Human	H1	N1	NewZealand	Oceania	2000
H1g1.5.3	CY009812	Canterbury/78/2000	Human	H1	N1	NewZealand	Oceania	2000
H1g1.5.3	CY009172	SouthCanterbury/50/2000	Human	H1	N1	NewZealand	Oceania	2000
H1g1.5.3	CY009196	Canterbury/36/2000	Human	H1	N1	NewZealand	Oceania	2000
H1g1.5.3	CY009780	SouthCanterbury/40/2000	Human	H1	N1	NewZealand	Oceania	2000
H1g1.5.3	CY009836	SouthCanterbury/59/2000	Human	H1	N1	NewZealand	Oceania	2000
H1g1.5.3	CY016971	Wellington/24/2000	Human	H1	N1	NewZealand	Oceania	2000
H1g1.5.3	AF268312	Peru/1798/99	Human	H1	N1	Peru	SouthAmerica	1999
H1g1.5.3	AF268313	Peru/1621/99	Human	H1	N1	Peru	SouthAmerica	1999
H1g1.5.3	AY971010	RiodeJaneiro/404/01	Human	H1	N1	Brazil	SouthAmerica	2001
H1g1.5.3	AY971008	EspiritoSanto/39/01	Human	H1	N1	Brazil	SouthAmerica	2001
H1g1.5.3	AY971009	EspiritoSanto/45/01	Human	H1	N1	Brazil	SouthAmerica	2001
H1g1.5.3	AJ457889	Brazil/202/2000	Human	H1	N1	Brazil	SouthAmerica	2000
H1g1.5.3	DQ336005	Brazil/015/00	Human	H1	N1	Brazil	SouthAmerica	2000
H1g1.5.3	AY971003	RiodeJaneiro/20/00	Human	H1	N1	Brazil	SouthAmerica	2000
H1g1.5.3	AY971004	RiodeJaneiro/21/00	Human	H1	N1	Brazil	SouthAmerica	2000
H1g1.5.3	AY971011	RioGdoSul/358/02	Human	H1	N1	Brazil	SouthAmerica	2002
H1g1.5.3	AY971006	EspiritoSanto/141/01	Human	H1	N1	Brazil	SouthAmerica	2001
H1g1.5.3	AY971007	EspiritoSanto/150/00	Human	H1	N1	Brazil	SouthAmerica	2000
H1g1.5.3	AY063228	Ecuador/2630/01	Human	H1	N1	Ecuador	SouthAmerica	2001
H1g1.5.3	DQ335994	Brazil/103/01	Human	H1	N1	Brazil	SouthAmerica	2001
H1g1.5.3	DQ336000	Brazil/121/01	Human	H1	N1	Brazil	SouthAmerica	2001
H1g1.5.3	DQ336001	Brazil/122/01	Human	H1	N1	Brazil	SouthAmerica	2001
H1g1.5.3	DQ335993	Brazil/101/01	Human	H1	N1	Brazil	SouthAmerica	2001
H1g1.5.3	DQ335992	Brazil/099/01	Human	H1	N1	Brazil	SouthAmerica	2001
H1g1.5.3	DQ335996	Brazil/109/01	Human	H1	N1	Brazil	SouthAmerica	2001
H1g1.5.3	DQ335997	Brazil/112/01	Human	H1	N1	Brazil	SouthAmerica	2001
H1g1.5.3	DQ336003	Brazil/133/01	Human	H1	N1	Brazil	SouthAmerica	2001
H1g1.5.3	DQ336004	Brazil/140/01	Human	H1	N1	Brazil	SouthAmerica	2001
H1g1.5.3	DQ335995	Brazil/104/01	Human	H1	N1	Brazil	SouthAmerica	2001
H1g1.5.3	DQ335998	Brazil/113/01	Human	H1	N1	Brazil	SouthAmerica	2001
H1g1.5.3	DQ335999	Brazil/114/01	Human	H1	N1	Brazil	SouthAmerica	2001
H1g1.5.3	DQ336002	Brazil/126/01	Human	H1	N1	Brazil	SouthAmerica	2001
H1g1.5.3	EF462570	Johannesburg/28/05	Human	H1	N1	SouthAfrica	Africa	2005
H1g1.5.3	EF462571	Johannesburg/146/05	Human	H1	N1	SouthAfrica	Africa	2005
H1g1.5.3	EF566271	Johannesburg/479/2005	Human	H1	N0	SouthAfrica	Africa	2005
H1g1.5.3	EF566272	Macau/405/2005	Human	H1	N0	Macau	Asia	2005
H1g1.5.3	EU032580	human/Pandharpur/20055169/2005	Human	H1	N1	India	Asia	2005
H1g1.5.3	AB501389	Thailand/328/2006	Human	H1	N1	Thailand	Asia	2006
H1g1.5.3	AB501395	Thailand/344/2006	Human	H1	N1	Thailand	Asia	2006
H1g1.5.3	AB434100	Morioka/3/2005	Human	H1	N1	Japan	Asia	2005
H1g1.5.3	AB434101	Morioka/4/2005	Human	H1	N1	Japan	Asia	2005
H1g1.5.3	AB434104	Morioka/5/2005	Human	H1	N1	Japan	Asia	2005
H1g1.5.3	AB434105	Morioka/7/2005	Human	H1	N1	Japan	Asia	2005
H1g1.5.3	EF566235	Thailand/28/2005	Human	H1	N1	Thailand	Asia	2005
H1g1.5.3	AB434102	Morioka/21/2005	Human	H1	N1	Japan	Asia	2005
H1g1.5.3	AB434106	Morioka/1/2005	Human	H1	N1	Japan	Asia	2005
H1g1.5.3	FJ225988	Ningbo/514/2005	Human	H1	N1	China	Asia	2005
H1g1.5.3	FJ225991	Ningbo/348/2005	Human	H1	N1	China	Asia	2005
H1g1.5.3	EF566236	Macau/122/2005	Human	H1	N1	Macau	Asia	2005
H1g1.5.3	FJ794130	Incheon/613/2005	Human	H1	N1	SouthKorea	Asia	2005
H1g1.5.3	FJ794129	Incheon/546/2005	Human	H1	N1	SouthKorea	Asia	2005
H1g1.5.3	EU032581	human/Pandharpur/20055180/2005	Human	H1	N1	India	Asia	2005
H1g1.5.3	EU032582	human/Pandharpur/20055182/2005	Human	H1	N1	India	Asia	2005
H1g1.5.3	EU032583	human/Pandharpur/20055194/2005	Human	H1	N1	India	Asia	2005
H1g1.5.3	AB255389	Aichi/2/2006	Human	H1	N1	Japan	Asia	2006
H1g1.5.3	AB255391	Aichi/17/2006	Human	H1	N1	Japan	Asia	2006
H1g1.5.3	AB255397	Aichi/132/2006	Human	H1	N1	Japan	Asia	2006
H1g1.5.3	AB243744	Aichi/168/2005	Human	H1	N1	Japan	Asia	2005
H1g1.5.3	AB243745	Aichi/169/2005	Human	H1	N1	Japan	Asia	2005
H1g1.5.3	AB255390	Aichi/11/2006	Human	H1	N1	Japan	Asia	2006
H1g1.5.3	EF566358	Malaysia/88/2004	Human	H1	N1	Malaysia	Asia	2004
H1g1.5.3	EF566238	Thailand/131/2005	Human	H1	N0	Thailand	Asia	2005
H1g1.5.3	EU032584	human/Pandharpur/20055200/2005	Human	H1	N1	India	Asia	2005
H1g1.5.3	EF566237	Macau/227/2005	Human	H1	N1	Macau	Asia	2005
H1g1.5.3	EU021264	Thailand/CU32/2006	Human	H1	N1	Thailand	Asia	2006
H1g1.5.3	EF566320	Thailand/402/2005	Human	H1	N0	Thailand	Asia	2005
H1g1.5.3	EU032585	human/Pandharpur/20055210/2005	Human	H1	N1	India	Asia	2005
H1g1.5.3	EU155129	HongKong/948/2006	Human	H1	N1	HongKong	Asia	2006
H1g1.5.3	EF566373	Malaysia/1513/2004	Human	H1	N1	Malaysia	Asia	2004
H1g1.5.3	EF566126	Malaysia/1513/2004	Human	H1	N1	Malaysia	Asia	2004
H1g1.5.3	FJ794128	Jeonbuk/444/2005	Human	H1	N1	SouthKorea	Asia	2005
H1g1.5.3	EF566041	Malaysia/1003/2003	Human	H1	N1	Malaysia	Asia	2003
H1g1.5.3	EF566234	Taiwan/50/2005	Human	H1	N1	Taiwan	Asia	2005
H1g1.5.3	AB255393	Aichi/46/2006	Human	H1	N1	Japan	Asia	2006
H1g1.5.3	AB255394	Aichi/67/2006	Human	H1	N1	Japan	Asia	2006
H1g1.5.3	AB255396	Aichi/111/2006	Human	H1	N1	Japan	Asia	2006
H1g1.5.3	EF566372	Bangkok/1406/2004	Human	H1	N1	Thailand	Asia	2004
H1g1.5.3	EF566123	Prachinburi/1686/2004	Human	H1	N0	Thailand	Asia	2004
H1g1.5.3	EF566042	Malaysia/643/2003	Human	H1	N1	Malaysia	Asia	2003
H1g1.5.3	EF566043	Malaysia/687/2003	Human	H1	N1	Malaysia	Asia	2003
H1g1.5.3	CY028091	Tennessee/UR06-0523/2007	Human	H1	N1	Lebanon	Asia	2007
H1g1.5.3	EU551850	Paris/692/2007	Human	H1	N1	France	Europe	2007
H1g1.5.3	EU097955	Denmark/50/2006	Human	H1	N1	Denmark	Europe	2006
H1g1.5.3	EU097958	Denmark/49/2006	Human	H1	N1	Denmark	Europe	2006
H1g1.5.3	FJ231776	Baden-Wuerttemberg/3/2006	Human	H1	N1	Germany	Europe	2006
H1g1.5.3	FJ231777	Baden-Wuerttemberg/4/2006	Human	H1	N1	Germany	Europe	2006
H1g1.5.3	FJ231778	Baden-Wuerttemberg/5/2006	Human	H1	N1	Germany	Europe	2006
H1g1.5.3	FJ445085	England/494/2006	Human	H1	N1	UnitedKingdom	Europe	2006
H1g1.5.3	EU551844	Paris/2149/2006	Human	H1	N1	France	Europe	2006
H1g1.5.3	EU551853	Paris/2207/2006	Human	H1	N1	France	Europe	2006
H1g1.5.3	EU551843	Caen/1951/2006	Human	H1	N1	France	Europe	2006
H1g1.5.3	FJ231780	Berlin/9/2006	Human	H1	N1	Germany	Europe	2006
H1g1.5.3	FJ231782	Brandenburg/1/2006	Human	H1	N1	Germany	Europe	2006
H1g1.5.3	EU551852	Caen/1670/2006	Human	H1	N1	France	Europe	2006
H1g1.5.3	FJ231785	Rheinland-Pfalz/1/2006	Human	H1	N1	Germany	Europe	2006
H1g1.5.3	EU685784	Paris/650/2004	Human	H1	N1	France	Europe	2004
H1g1.5.3	FJ231774	Sachsen/14/2005	Human	H1	N1	Germany	Europe	2005
H1g1.5.3	EU097957	Denmark/48/2006	Human	H1	N1	Denmark	Europe	2006
H1g1.5.3	FJ231775	Thueringen/40/2005	Human	H1	N1	Germany	Europe	2005
H1g1.5.3	FJ231767	Niedersachsen/191/2005	Human	H1	N1	Germany	Europe	2005
H1g1.5.3	EF566044	Poitiers/2168/2003	Human	H1	N1	France	Europe	2003
H1g1.5.3	FJ231762	Berlin/60/2005	Human	H1	N1	Germany	Europe	2005
H1g1.5.3	FJ231763	Bremen/4/2005	Human	H1	N1	Germany	Europe	2005
H1g1.5.3	EU097949	Denmark/33/2005	Human	H1	N1	Denmark	Europe	2005
H1g1.5.3	FJ231770	Niedersachsen/217/2005	Human	H1	N1	Germany	Europe	2005
H1g1.5.3	EU097954	Denmark/110/2005	Human	H1	N1	Denmark	Europe	2005
H1g1.5.3	EU097944	Denmark/116/2005	Human	H1	N1	Denmark	Europe	2005
H1g1.5.3	EU097947	Denmark/226/2005	Human	H1	N1	Denmark	Europe	2005
H1g1.5.3	EU097952	Denmark/79/2005	Human	H1	N1	Denmark	Europe	2005
H1g1.5.3	EU097951	Denmark/22/2005	Human	H1	N1	Denmark	Europe	2005
H1g1.5.3	EU097946	Denmark/54/2005	Human	H1	N1	Denmark	Europe	2005
H1g1.5.3	FJ654336	Thessalonika/24/2005	Human	H1	N1	Greece	Europe	2005
H1g1.5.3	DQ265706	England/2005	Human	H1	N1	UnitedKingdom	Europe	2005
H1g1.5.3	EU097945	Denmark/11/2005	Human	H1	N1	Denmark	Europe	2005
H1g1.5.3	FJ231772	Nordrhein-Westfalen/6/2005	Human	H1	N1	Germany	Europe	2005
H1g1.5.3	FJ231764	Bremen/5/2005	Human	H1	N1	Germany	Europe	2005
H1g1.5.3	FJ231771	Niedersachsen/218/2005	Human	H1	N1	Germany	Europe	2005
H1g1.5.3	FJ231761	Berlin/18/2005	Human	H1	N1	Germany	Europe	2005
H1g1.5.3	FJ231768	Niedersachsen/192/2005	Human	H1	N1	Germany	Europe	2005
H1g1.5.3	EU097943	Denmark/17/2004	Human	H1	N1	Denmark	Europe	2004
H1g1.5.3	EU097948	Denmark/16/2004	Human	H1	N1	Denmark	Europe	2004
H1g1.5.3	EU097950	Denmark/3/2005	Human	H1	N1	Denmark	Europe	2005
H1g1.5.3	EU097953	Denmark/15/2004	Human	H1	N1	Denmark	Europe	2004
H1g1.5.3	FJ231765	Hamburg/1/2005	Human	H1	N1	Germany	Europe	2005
H1g1.5.3	FJ231769	Niedersachsen/202/2005	Human	H1	N1	Germany	Europe	2005
H1g1.5.3	FJ231773	Rheinland-Pfalz/58/2005	Human	H1	N1	Germany	Europe	2005
H1g1.5.3	FJ445027	England/493/2006	Human	H1	N1	UnitedKingdom	Europe	2006
H1g1.5.3	FJ231766	Hessen/4/2005	Human	H1	N1	Germany	Europe	2005
H1g1.5.3	FJ986622	Michigan/09/2007	Human	H1	N2	USA	NorthAmerica	2007
H1g1.5.3	EU199296	Georgia/08/2006	Human	H1	N1	USA	NorthAmerica	2006
H1g1.5.3	CY028075	Tennessee/UR06-0080/2007	Human	H1	N1	USA	NorthAmerica	2007
H1g1.5.3	CY028395	Tennessee/UR06-0277/2007	Human	H1	N1	USA	NorthAmerica	2007
H1g1.5.3	CY016376	Delaware/1/2006	Human	H1	N1	USA	NorthAmerica	2006
H1g1.5.3	EU100680	Georgia/26/2006	Human	H1	N1	USA	NorthAmerica	2006
H1g1.5.3	EU100678	Georgia/17/2006	Human	H1	N1	USA	NorthAmerica	2006
H1g1.5.3	EU100712	Wisconsin/37/2006	Human	H1	N1	USA	NorthAmerica	2006
H1g1.5.3	EU100704	Florida/09/2006	Human	H1	N1	USA	NorthAmerica	2006
H1g1.5.3	CY028379	Virginia/UR06-0332/2007	Human	H1	N1	USA	NorthAmerica	2007
H1g1.5.3	CY027731	Tennessee/UR06-0508/2007	Human	H1	N1	USA	NorthAmerica	2007
H1g1.5.3	CY027451	Tennessee/UR06-0414/2007	Human	H1	N1	USA	NorthAmerica	2007
H1g1.5.3	EU199287	Tennessee/04/2007	Human	H1	N1	USA	NorthAmerica	2007
H1g1.5.3	CY027955	Oregon/UR06-0185/2007	Human	H1	N1	USA	NorthAmerica	2007
H1g1.5.3	CY026899	Oregon/UR06-0231/2007	Human	H1	N1	USA	NorthAmerica	2007
H1g1.5.3	CY027923	Oregon/UR06-0186/2007	Human	H1	N1	USA	NorthAmerica	2007
H1g1.5.3	CY028211	Oregon/UR06-0219/2007	Human	H1	N1	USA	NorthAmerica	2007
H1g1.5.3	CY027083	Oregon/UR06-0230/2007	Human	H1	N1	USA	NorthAmerica	2007
H1g1.5.3	CY027691	Oregon/UR06-0179/2007	Human	H1	N1	USA	NorthAmerica	2007
H1g1.5.3	CY027203	Mississippi/UR06-0047/2007	Human	H1	N1	USA	NorthAmerica	2007
H1g1.5.3	CY028003	Tennessee/UR06-0312/2007	Human	H1	N1	USA	NorthAmerica	2007
H1g1.5.3	CY028339	Florida/UR06-0209/2007	Human	H1	N1	USA	NorthAmerica	2007
H1g1.5.3	CY025213	Texas/UR06-0012/2006	Human	H1	N1	USA	NorthAmerica	2006
H1g1.5.3	CY026659	Florida/UR06-0501/2007	Human	H1	N1	USA	NorthAmerica	2007
H1g1.5.3	CY025659	Vermont/UR06-0301/2007	Human	H1	N1	USA	NorthAmerica	2007
H1g1.5.3	CY025771	Florida/UR06-0280/2007	Human	H1	N1	USA	NorthAmerica	2007
H1g1.5.3	CY025795	Vermont/UR06-0089/2007	Human	H1	N1	USA	NorthAmerica	2007
H1g1.5.3	CY027315	Florida/UR06-0208/2007	Human	H1	N1	USA	NorthAmerica	2007
H1g1.5.3	EU199305	Tennessee/02/2007	Human	H1	N1	USA	NorthAmerica	2007
H1g1.5.3	CY028756	Virginia/UR06-0180/2007	Human	H1	N1	USA	NorthAmerica	2007
H1g1.5.3	CY026963	Texas/UR06-0157/2007	Human	H1	N1	USA	NorthAmerica	2007
H1g1.5.3	CY027163	Texas/UR06-0305/2007	Human	H1	N1	USA	NorthAmerica	2007
H1g1.5.3	CY037783	Tennessee/UR06-0106/2007	Human	H1	N1	USA	NorthAmerica	2007
H1g1.5.3	CY027379	Tennessee/UR06-0119/2007	Human	H1	N1	USA	NorthAmerica	2007
H1g1.5.3	CY027747	Tennessee/UR06-0459/2007	Human	H1	N1	USA	NorthAmerica	2007
H1g1.5.3	CY027835	Kansas/UR06-0085/2007	Human	H1	N1	USA	NorthAmerica	2007
H1g1.5.3	CY026891	Tennessee/UR06-0078/2007	Human	H1	N1	USA	NorthAmerica	2007
H1g1.5.3	CY027131	Tennessee/UR06-0120/2007	Human	H1	N1	USA	NorthAmerica	2007
H1g1.5.3	CY028051	Kentucky/UR06-0425/2007	Human	H1	N1	USA	NorthAmerica	2007
H1g1.5.3	CY028035	Kentucky/UR06-0046/2007	Human	H1	N1	USA	NorthAmerica	2007
H1g1.5.3	CY027723	Tennessee/UR06-0113/2007	Human	H1	N1	USA	NorthAmerica	2007
H1g1.5.3	CY028083	Kentucky/UR06-0391/2007	Human	H1	N1	USA	NorthAmerica	2007
H1g1.5.3	CY037775	Tennessee/UR06-0379/2007	Human	H1	N1	USA	NorthAmerica	2007
H1g1.5.3	CY027019	Kentucky/UR06-0183/2007	Human	H1	N1	USA	NorthAmerica	2007
H1g1.5.3	EU199310	Tennessee/01/2007	Human	H1	N1	USA	NorthAmerica	2007
H1g1.5.3	EU100674	Texas/15/2006	Human	H1	N1	USA	NorthAmerica	2006
H1g1.5.3	CY027043	Illinois/UR06-0146/2007	Human	H1	N1	USA	NorthAmerica	2007
H1g1.5.3	EU199353	SouthDakota/03/2007	Human	H1	N1	USA	NorthAmerica	2007
H1g1.5.3	EU199326	NewJersey/11/2007	Human	H1	N1	USA	NorthAmerica	2007
H1g1.5.3	EU543278	giantanteater/Tennessee/UTCVM07-733/2007	Giantanteater	H1	N1	USA	NorthAmerica	2007
H1g1.5.3	CY027771	Oklahoma/UR06-0063/2007	Human	H1	N1	USA	NorthAmerica	2007
H1g1.5.3	EU100691	Oklahoma/3/2006	Human	H1	N1	USA	NorthAmerica	2006
H1g1.5.3	CY016380	Virginia/03/2006	Human	H1	N1	USA	NorthAmerica	2006
H1g1.5.3	CY016377	Delaware/2/2006	Human	H1	N1	USA	NorthAmerica	2006
H1g1.5.3	CY016391	Maryland/1/2006	Human	H1	N1	USA	NorthAmerica	2006
H1g1.5.3	CY016364	California/26/2005	Human	H1	N1	USA	NorthAmerica	2005
H1g1.5.3	CY026187	Texas/UR06-0303/2007	Human	H1	N1	USA	NorthAmerica	2007
H1g1.5.3	CY027323	Texas/UR06-0342/2007	Human	H1	N1	USA	NorthAmerica	2007
H1g1.5.3	EU199349	California/03/2007	Human	H1	N1	USA	NorthAmerica	2007
H1g1.5.3	CY026267	Texas/UR06-0306/2007	Human	H1	N1	USA	NorthAmerica	2007
H1g1.5.3	CY026211	Texas/UR06-0195/2007	Human	H1	N1	USA	NorthAmerica	2007
H1g1.5.3	CY025955	Texas/UR06-0174/2007	Human	H1	N1	USA	NorthAmerica	2007
H1g1.5.3	EU199298	Texas/25/2006	Human	H1	N1	USA	NorthAmerica	2006
H1g1.5.3	EU516296	California/02/2007	Human	H1	N1	USA	NorthAmerica	2007
H1g1.5.3	CY027659	Texas/UR06-0133/2007	Human	H1	N1	USA	NorthAmerica	2007
H1g1.5.3	CY026403	Texas/UR06-0270/2007	Human	H1	N1	USA	NorthAmerica	2007
H1g1.5.3	EU199352	California/04/2007	Human	H1	N1	USA	NorthAmerica	2007
H1g1.5.3	CY025389	Texas/UR06-0398/2007	Human	H1	N1	USA	NorthAmerica	2007
H1g1.5.3	CY025509	Kentucky/UR06-0097/2007	Human	H1	N1	USA	NorthAmerica	2007
H1g1.5.3	CY026515	Kentucky/UR06-0057/2007	Human	H1	N1	USA	NorthAmerica	2007
H1g1.5.3	CY025357	Kentucky/UR06-0363/2007	Human	H1	N1	USA	NorthAmerica	2007
H1g1.5.3	CY025261	Kentucky/UR06-0059/2007	Human	H1	N1	USA	NorthAmerica	2007
H1g1.5.3	CY026683	Vermont/UR06-0035/2007	Human	H1	N1	USA	NorthAmerica	2007
H1g1.5.3	EU100692	Delaware/4/2006	Human	H1	N1	USA	NorthAmerica	2006
H1g1.5.3	CY016392	Indiana/1/2006	Human	H1	N1	USA	NorthAmerica	2006
H1g1.5.3	CY031441	Honduras/AF1270/2007	Human	H1	N1	Honduras	NorthAmerica	2007
H1g1.5.3	EU199299	NewMexico/02/2006	Human	H1	N1	USA	NorthAmerica	2006
H1g1.5.3	EU100708	NewMexico/02/2006	Human	H1	N1	USA	NorthAmerica	2006
H1g1.5.3	EU100703	Florida/08/2006	Human	H1	N1	USA	NorthAmerica	2006
H1g1.5.3	CY027259	Ohio/UR06-0521/2007	Human	H1	N1	USA	NorthAmerica	2007
H1g1.5.3	CY025971	Ohio/UR06-0325/2007	Human	H1	N1	USA	NorthAmerica	2007
H1g1.5.3	CY027443	Ohio/UR06-0121/2007	Human	H1	N1	USA	NorthAmerica	2007
H1g1.5.3	CY027947	Virginia/UR06-0594/2007	Human	H1	N1	USA	NorthAmerica	2007
H1g1.5.3	CY028123	Ohio/UR06-0353/2007	Human	H1	N1	USA	NorthAmerica	2007
H1g1.5.3	CY026011	Ohio/UR06-0122/2007	Human	H1	N1	USA	NorthAmerica	2007
H1g1.5.3	CY027403	Ohio/UR06-0166/2007	Human	H1	N1	USA	NorthAmerica	2007
H1g1.5.3	CY027003	Ohio/UR06-0465/2007	Human	H1	N1	USA	NorthAmerica	2007
H1g1.5.3	EU516022	Ohio/05/2006	Human	H1	N1	USA	NorthAmerica	2006
H1g1.5.3	CY027963	Oklahoma/UR06-0241/2007	Human	H1	N1	USA	NorthAmerica	2007
H1g1.5.3	CY025891	Mississippi/UR06-0537/2007	Human	H1	N1	USA	NorthAmerica	2007
H1g1.5.3	CY026731	NewYork/UR06-0134/2007	Human	H1	N1	USA	NorthAmerica	2007
H1g1.5.3	CY027067	Ohio/UR06-0443/2007	Human	H1	N1	USA	NorthAmerica	2007
H1g1.5.3	CY031571	Ohio/UR06-0591/2007	Human	H1	N1	USA	NorthAmerica	2007
H1g1.5.3	CY027251	Tennessee/UR06-0294/2007	Human	H1	N1	USA	NorthAmerica	2007
H1g1.5.3	CY028764	Kansas/UR06-0299/2007	Human	H1	N1	USA	NorthAmerica	2007
H1g1.5.3	CY027803	Illinois/UR06-0032/2007	Human	H1	N1	USA	NorthAmerica	2007
H1g1.5.3	CY027635	Tennessee/UR06-0388/2007	Human	H1	N1	USA	NorthAmerica	2007
H1g1.5.3	CY026203	Kentucky/UR06-0187/2007	Human	H1	N1	USA	NorthAmerica	2007
H1g1.5.3	CY027555	Texas/UR06-0204/2007	Human	H1	N1	USA	NorthAmerica	2007
H1g1.5.3	CY028411	Virginia/UR06-0346/2007	Human	H1	N1	USA	NorthAmerica	2007
H1g1.5.3	CY026579	Colorado/UR06-0110/2007	Human	H1	N1	USA	NorthAmerica	2007
H1g1.5.3	CY025317	Mississippi/UR06-0242/2007	Human	H1	N1	USA	NorthAmerica	2007
H1g1.5.3	CY026715	Texas/UR06-0582/2007	Human	H1	N1	USA	NorthAmerica	2007
H1g1.5.3	CY027115	Tennessee/UR06-0152/2007	Human	H1	N1	USA	NorthAmerica	2007
H1g1.5.3	CY025923	Kentucky/UR06-0034/2007	Human	H1	N1	USA	NorthAmerica	2007
H1g1.5.3	CY025699	Kentucky/UR06-0043/2007	Human	H1	N1	USA	NorthAmerica	2007
H1g1.5.3	CY025269	Texas/UR06-0502/2007	Human	H1	N1	USA	NorthAmerica	2007
H1g1.5.3	CY026003	Ohio/UR06-0100/2007	Human	H1	N1	USA	NorthAmerica	2007
H1g1.5.3	CY025309	Kentucky/UR06-0082/2007	Human	H1	N1	USA	NorthAmerica	2007
H1g1.5.3	CY027891	California/UR06-0440/2007	Human	H1	N1	USA	NorthAmerica	2007
H1g1.5.3	CY027219	Kentucky/UR06-0029/2007	Human	H1	N1	USA	NorthAmerica	2007
H1g1.5.3	CY028331	Texas/UR06-0250/2007	Human	H1	N1	USA	NorthAmerica	2007
H1g1.5.3	CY037655	Ohio/UR06-0493/2007	Human	H1	N1	USA	NorthAmerica	2007
H1g1.5.3	CY025547	Texas/UR06-0563/2007	Human	H1	N1	USA	NorthAmerica	2007
H1g1.5.3	CY030061	Ohio/UR06-0296/2007	Human	H1	N1	USA	NorthAmerica	2007
H1g1.5.3	CY025461	Kentucky/UR06-0129/2007	Human	H1	N1	USA	NorthAmerica	2007
H1g1.5.3	CY026739	Kentucky/UR06-0061/2007	Human	H1	N1	USA	NorthAmerica	2007
H1g1.5.3	CY026851	Ohio/UR06-0341/2007	Human	H1	N1	USA	NorthAmerica	2007
H1g1.5.3	CY027171	Kentucky/UR06-0081/2007	Human	H1	N1	USA	NorthAmerica	2007
H1g1.5.3	CY028195	Kentucky/UR06-0007/2006	Human	H1	N1	USA	NorthAmerica	2006
H1g1.5.3	CY025453	Kentucky/UR06-0062/2007	Human	H1	N1	USA	NorthAmerica	2007
H1g1.5.3	CY025787	Kentucky/UR06-0033/2007	Human	H1	N1	USA	NorthAmerica	2007
H1g1.5.3	CY025915	Kentucky/UR06-0069/2007	Human	H1	N1	USA	NorthAmerica	2007
H1g1.5.3	CY030727	Kentucky/UR06-0070/2007	Human	H1	N1	USA	NorthAmerica	2007
H1g1.5.3	CY031148	Ohio/UR06-0178/2007	Human	H1	N1	USA	NorthAmerica	2007
H1g1.5.3	CY025229	Kentucky/UR06-0010/2006	Human	H1	N1	USA	NorthAmerica	2006
H1g1.5.3	CY026651	Kentucky/UR06-0027/2007	Human	H1	N1	USA	NorthAmerica	2007
H1g1.5.3	CY026803	Kentucky/UR06-0058/2007	Human	H1	N1	USA	NorthAmerica	2007
H1g1.5.3	CY026811	Kentucky/UR06-0071/2007	Human	H1	N1	USA	NorthAmerica	2007
H1g1.5.3	CY026947	Ohio/UR06-0518/2007	Human	H1	N1	USA	NorthAmerica	2007
H1g1.5.3	CY026955	Ohio/UR06-0091/2007	Human	H1	N1	USA	NorthAmerica	2007
H1g1.5.3	CY027331	Kentucky/UR06-0220/2007	Human	H1	N1	USA	NorthAmerica	2007
H1g1.5.3	CY027387	Ohio/UR06-0233/2007	Human	H1	N1	USA	NorthAmerica	2007
H1g1.5.3	CY025635	Kentucky/UR06-0188/2007	Human	H1	N1	USA	NorthAmerica	2007
H1g1.5.3	CY028467	California/UR06-0552/2007	Human	H1	N1	USA	NorthAmerica	2007
H1g1.5.3	CY025365	Texas/UR06-0025/2007	Human	H1	N1	USA	NorthAmerica	2007
H1g1.5.3	CY026675	California/UR06-0375/2007	Human	H1	N1	USA	NorthAmerica	2007
H1g1.5.3	CY025293	Texas/UR06-0380/2007	Human	H1	N1	USA	NorthAmerica	2007
H1g1.5.3	CY025563	Texas/UR06-0461/2007	Human	H1	N1	USA	NorthAmerica	2007
H1g1.5.3	CY027179	Texas/UR06-0176/2007	Human	H1	N1	USA	NorthAmerica	2007
H1g1.5.3	CY025397	Texas/UR06-0203/2007	Human	H1	N1	USA	NorthAmerica	2007
H1g1.5.3	CY026347	Texas/UR06-0271/2007	Human	H1	N1	USA	NorthAmerica	2007
H1g1.5.3	CY026363	Texas/UR06-0175/2007	Human	H1	N1	USA	NorthAmerica	2007
H1g1.5.3	CY026635	Texas/UR06-0308/2007	Human	H1	N1	USA	NorthAmerica	2007
H1g1.5.3	CY025803	Mississippi/UR06-0048/2007	Human	H1	N1	USA	NorthAmerica	2007
H1g1.5.3	CY027491	Tennessee/UR06-0473/2007	Human	H1	N1	USA	NorthAmerica	2007
H1g1.5.3	CY028027	Ohio/UR06-0522/2007	Human	H1	N1	USA	NorthAmerica	2007
H1g1.5.3	CY027027	Virginia/UR06-0244/2007	Human	H1	N1	USA	NorthAmerica	2007
H1g1.5.3	CY025987	Virginia/UR06-0245/2007	Human	H1	N1	USA	NorthAmerica	2007
H1g1.5.3	CY027899	Colorado/UR06-0496/2007	Human	H1	N1	USA	NorthAmerica	2007
H1g1.5.3	CY028099	Virginia/UR06-0387/2007	Human	H1	N1	USA	NorthAmerica	2007
H1g1.5.3	CY026379	NewYork/UR06-0056/2007	Human	H1	N1	USA	NorthAmerica	2007
H1g1.5.3	CY026835	Virginia/UR06-0139/2007	Human	H1	N1	USA	NorthAmerica	2007
H1g1.5.3	CY027755	Virginia/UR06-0114/2007	Human	H1	N1	USA	NorthAmerica	2007
H1g1.5.3	CY025381	Alabama/UR06-0455/2007	Human	H1	N1	USA	NorthAmerica	2007
H1g1.5.3	CY027827	Virginia/UR06-0075/2007	Human	H1	N1	USA	NorthAmerica	2007
H1g1.5.3	CY027475	Tennessee/UR06-0234/2007	Human	H1	N1	USA	NorthAmerica	2007
H1g1.5.3	CY025995	Virginia/UR06-0109/2007	Human	H1	N1	USA	NorthAmerica	2007
H1g1.5.3	CY027931	Oregon/UR06-0291/2007	Human	H1	N1	USA	NorthAmerica	2007
H1g1.5.3	CY037471	Virginia/UR06-0065/2007	Human	H1	N1	USA	NorthAmerica	2007
H1g1.5.3	CY026939	Virginia/UR06-0164/2007	Human	H1	N1	USA	NorthAmerica	2007
H1g1.5.3	EU199321	Alabama/23/2006	Human	H1	N1	USA	NorthAmerica	2006
H1g1.5.3	EU100682	SouthCarolina/2/2006	Human	H1	N1	USA	NorthAmerica	2006
H1g1.5.3	EU100679	Georgia/21/2006	Human	H1	N1	USA	NorthAmerica	2006
H1g1.5.3	EU516144	Minnesota/23/2007	Human	H1	N1	USA	NorthAmerica	2007
H1g1.5.3	EU199311	Texas/02/2007	Human	H1	N1	USA	NorthAmerica	2007
H1g1.5.3	EU516109	Georgia/03/2007	Human	H1	N1	USA	NorthAmerica	2007
H1g1.5.3	CY027987	Ohio/UR06-0411/2007	Human	H1	N1	USA	NorthAmerica	2007
H1g1.5.3	CY028107	Tennessee/UR06-0076/2007	Human	H1	N1	USA	NorthAmerica	2007
H1g1.5.3	CY028355	Kentucky/UR06-0181/2007	Human	H1	N1	USA	NorthAmerica	2007
H1g1.5.3	CY027811	Texas/UR06-0039/2007	Human	H1	N1	USA	NorthAmerica	2007
H1g1.5.3	CY028291	Texas/UR06-0038/2007	Human	H1	N1	USA	NorthAmerica	2007
H1g1.5.3	CY028163	Kentucky/UR06-0258/2007	Human	H1	N1	USA	NorthAmerica	2007
H1g1.5.3	CY027915	Kentucky/UR06-0259/2007	Human	H1	N1	USA	NorthAmerica	2007
H1g1.5.3	CY031546	Virginia/UR06-0107/2007	Human	H1	N1	USA	NorthAmerica	2007
H1g1.5.3	CY027051	Kentucky/UR06-0154/2007	Human	H1	N1	USA	NorthAmerica	2007
H1g1.5.3	CY026867	Kentucky/UR06-0127/2007	Human	H1	N1	USA	NorthAmerica	2007
H1g1.5.3	CY026875	Kentucky/UR06-0123/2007	Human	H1	N1	USA	NorthAmerica	2007
H1g1.5.3	CY028043	Kentucky/UR06-0401/2007	Human	H1	N1	USA	NorthAmerica	2007
H1g1.5.3	EU199332	Minnesota/02/2007	Human	H1	N1	USA	NorthAmerica	2007
H1g1.5.3	EU199291	Minnesota/04/2007	Human	H1	N1	USA	NorthAmerica	2007
H1g1.5.3	CY027779	Kentucky/UR06-0339/2007	Human	H1	N1	USA	NorthAmerica	2007
H1g1.5.3	CY028203	Tennessee/UR06-0055/2007	Human	H1	N1	USA	NorthAmerica	2007
H1g1.5.3	EU516101	Maryland/6/2006	Human	H1	N1	USA	NorthAmerica	2006
H1g1.5.3	EU100675	Florida/3e/2006	Human	H1	N1	USA	NorthAmerica	2006
H1g1.5.3	EU516297	Florida/3/2006	Human	H1	N1	USA	NorthAmerica	2006
H1g1.5.3	EU199324	NewJersey/04/2006	Human	H1	N1	USA	NorthAmerica	2006
H1g1.5.3	EU100694	Missouri/11/2006	Human	H1	N1	USA	NorthAmerica	2006
H1g1.5.3	EU199341	Mississippi/02/2006	Human	H1	N1	USA	NorthAmerica	2006
H1g1.5.3	CY027995	Virginia/UR06-0092/2007	Human	H1	N1	USA	NorthAmerica	2007
H1g1.5.3	CY031132	Virginia/UR06-0228/2007	Human	H1	N1	USA	NorthAmerica	2007
H1g1.5.3	CY026931	Virginia/UR06-0267/2007	Human	H1	N1	USA	NorthAmerica	2007
H1g1.5.3	CY028115	Tennessee/UR06-0509/2007	Human	H1	N1	USA	NorthAmerica	2007
H1g1.5.3	EU199334	Alabama/22/2006	Human	H1	N1	USA	NorthAmerica	2006
H1g1.5.3	EU199293	Wisconsin/47/2006	Human	H1	N1	USA	NorthAmerica	2006
H1g1.5.3	EU516021	Texas/31/2007	Human	H1	N1	USA	NorthAmerica	2007
H1g1.5.3	CY025325	Illinois/UR06-0377/2007	Human	H1	N1	USA	NorthAmerica	2007
H1g1.5.3	CY025675	Kentucky/UR06-0240/2007	Human	H1	N1	USA	NorthAmerica	2007
H1g1.5.3	CY025245	Illinois/UR006-018/2007	Human	H1	N1	USA	NorthAmerica	2007
H1g1.5.3	EU199356	Arkansas/01/2007	Human	H1	N1	USA	NorthAmerica	2007
H1g1.5.3	EU199351	Arkansas/01/2007	Human	H1	N1	USA	NorthAmerica	2007
H1g1.5.3	EU199288	Missouri/12/2006	Human	H1	N1	USA	NorthAmerica	2006
H1g1.5.3	EU199319	Wisconsin/52/2006	Human	H1	N1	USA	NorthAmerica	2006
H1g1.5.3	CY026235	Colorado/UR06-0498/2007	Human	H1	N1	USA	NorthAmerica	2007
H1g1.5.3	CY025963	Kansas/UR06-0140/2007	Human	H1	N1	USA	NorthAmerica	2007
H1g1.5.3	CY028363	Kansas/UR06-0192/2007	Human	H1	N1	USA	NorthAmerica	2007
H1g1.5.3	CY033465	Oregon/UR06-0609/2007	Human	H1	N1	USA	NorthAmerica	2007
H1g1.5.3	CY025517	Illinois/UR06-0456/2007	Human	H1	N1	USA	NorthAmerica	2007
H1g1.5.3	CY025237	Illinois/UR06-0019/2007	Human	H1	N1	USA	NorthAmerica	2007
H1g1.5.3	CY027651	Virginia/UR06-0562/2007	Human	H1	N1	USA	NorthAmerica	2007
H1g1.5.3	CY027979	Kansas/UR06-0284/2007	Human	H1	N1	USA	NorthAmerica	2007
H1g1.5.3	CY027427	Kansas/UR06-0283/2007	Human	H1	N1	USA	NorthAmerica	2007
H1g1.5.3	CY027787	Illinois/UR06-0227/2007	Human	H1	N1	USA	NorthAmerica	2007
H1g1.5.3	CY028347	Illinois/UR06-0096/2007	Human	H1	N1	USA	NorthAmerica	2007
H1g1.5.3	CY025571	Illinois/UR06-0248/2007	Human	H1	N1	USA	NorthAmerica	2007
H1g1.5.3	CY027739	Kansas/UR06-0068/2007	Human	H1	N1	USA	NorthAmerica	2007
H1g1.5.3	CY026611	Illinois/UR06-0376/2007	Human	H1	N1	USA	NorthAmerica	2007
H1g1.5.3	CY027347	Illinois/UR06-0249/2007	Human	H1	N1	USA	NorthAmerica	2007
H1g1.5.3	CY027363	Illinois/UR06-0098/2007	Human	H1	N1	USA	NorthAmerica	2007
H1g1.5.3	CY027667	Illinois/UR06-0088/2007	Human	H1	N1	USA	NorthAmerica	2007
H1g1.5.3	CY026179	Illinois/UR06-0223/2007	Human	H1	N1	USA	NorthAmerica	2007
H1g1.5.3	CY031551	Kansas/UR06-0102/2007	Human	H1	N1	USA	NorthAmerica	2007
H1g1.5.3	CY025525	Texas/UR06-0196/2007	Human	H1	N1	USA	NorthAmerica	2007
H1g1.5.3	CY025683	Texas/UR06-0193/2007	Human	H1	N1	USA	NorthAmerica	2007
H1g1.5.3	CY027619	Texas/UR06-0216/2007	Human	H1	N1	USA	NorthAmerica	2007
H1g1.5.3	CY036855	Texas/UR06-0156/2007	Human	H1	N1	USA	NorthAmerica	2007
H1g1.5.3	CY026595	Texas/UR06-0309/2007	Human	H1	N1	USA	NorthAmerica	2007
H1g1.5.3	CY030069	Kansas/UR06-0103/2007	Human	H1	N1	USA	NorthAmerica	2007
H1g1.5.3	CY028748	Kentucky/UR06-0372/2007	Human	H1	N1	USA	NorthAmerica	2007
H1g1.5.3	CY027011	Kentucky/UR06-0327/2007	Human	H1	N1	USA	NorthAmerica	2007
H1g1.5.3	CY025979	Kentucky/UR06-0128/2007	Human	H1	N1	USA	NorthAmerica	2007
H1g1.5.3	CY025947	Kentucky/UR06-0257/2007	Human	H1	N1	USA	NorthAmerica	2007
H1g1.5.3	CY028451	Tennessee/UR06-0073/2007	Human	H1	N1	USA	NorthAmerica	2007
H1g1.5.3	CY028131	Oklahoma/UR06-0519/2007	Human	H1	N1	USA	NorthAmerica	2007
H1g1.5.3	CY027035	Kansas/UR06-0104/2007	Human	H1	N1	USA	NorthAmerica	2007
H1g1.5.3	CY026691	Illinois/UR06-0224/2007	Human	H1	N1	USA	NorthAmerica	2007
H1g1.5.3	CY025429	Kentucky/UR06-0072/2007	Human	H1	N1	USA	NorthAmerica	2007
H1g1.5.3	CY027907	Illinois/UR06-0475/2007	Human	H1	N1	USA	NorthAmerica	2007
H1g1.5.3	CY028011	Kansas/UR06-0084/2007	Human	H1	N1	USA	NorthAmerica	2007
H1g1.5.3	CY028019	Kentucky/UR06-0162/2007	Human	H1	N1	USA	NorthAmerica	2007
H1g1.5.3	CY027459	Kentucky/UR06-0184/2007	Human	H1	N1	USA	NorthAmerica	2007
H1g1.5.3	EU199294	Nebraska/01/2007	Human	H1	N1	USA	NorthAmerica	2007
H1g1.5.3	CY026387	Texas/UR06-0444/2007	Human	H1	N1	USA	NorthAmerica	2007
H1g1.5.3	CY026987	Kentucky/UR06-0328/2007	Human	H1	N1	USA	NorthAmerica	2007
H1g1.5.3	EU100710	Wisconsin/01/2007	Human	H1	N1	USA	NorthAmerica	2007
H1g1.5.3	CY027875	Mississippi/UR06-0014/2006	Human	H1	N1	USA	NorthAmerica	2006
H1g1.5.3	CY025579	Mississippi/UR06-0145/2007	Human	H1	N1	USA	NorthAmerica	2007
H1g1.5.3	EU199327	Wisconsin/58/2006	Human	H1	N1	USA	NorthAmerica	2006
H1g1.5.3	EU409964	swine/Ohio/K1130/06	Swine	H1	N1	USA	NorthAmerica	2006
H1g1.5.3	CY037447	Florida/UR06-0265/2007	Human	H1	N1	USA	NorthAmerica	2007
H1g1.5.3	CY026723	Florida/UR06-0412/2007	Human	H1	N1	USA	NorthAmerica	2007
H1g1.5.3	CY025533	Florida/UR06-0355/2007	Human	H1	N1	USA	NorthAmerica	2007
H1g1.5.3	CY025779	Florida/UR06-0383/2007	Human	H1	N1	USA	NorthAmerica	2007
H1g1.5.3	CY026323	Florida/UR06-0354/2007	Human	H1	N1	USA	NorthAmerica	2007
H1g1.5.3	EU516142	Idaho/06/2007	Human	H1	N1	USA	NorthAmerica	2007
H1g1.5.3	EU199333	NewYork/26/2006	Human	H1	N1	USA	NorthAmerica	2006
H1g1.5.3	CY028732	California/UR06-0462/2007	Human	H1	N1	USA	NorthAmerica	2007
H1g1.5.3	CY037439	Texas/UR06-0422/2007	Human	H1	N1	USA	NorthAmerica	2007
H1g1.5.3	CY026763	California/UR06-0321/2007	Human	H1	N1	USA	NorthAmerica	2007
H1g1.5.3	CY026563	Texas/UR06-0397/2007	Human	H1	N1	USA	NorthAmerica	2007
H1g1.5.3	CY025405	Colorado/UR06-0207/2007	Human	H1	N1	USA	NorthAmerica	2007
H1g1.5.3	CY026395	Mississippi/UR06-0595/2007	Human	H1	N1	USA	NorthAmerica	2007
H1g1.5.3	EU199323	Wisconsin/54/2006	Human	H1	N1	USA	NorthAmerica	2006
H1g1.5.3	EU100707	Minnesota/17/2006	Human	H1	N1	USA	NorthAmerica	2006
H1g1.5.3	EU100711	Wisconsin/24/2006	Human	H1	N1	USA	NorthAmerica	2006
H1g1.5.3	CY026331	Texas/UR06-0540/2007	Human	H1	N1	USA	NorthAmerica	2007
H1g1.5.3	EU199336	NewJersey/10/2007	Human	H1	N1	USA	NorthAmerica	2007
H1g1.5.3	CY041442	Texas/UR06-0323/2007	Human	H1	N1	USA	NorthAmerica	2007
H1g1.5.3	CY025691	Texas/UR06-0359/2007	Human	H1	N1	USA	NorthAmerica	2007
H1g1.5.3	EU199331	Massachusetts/07/2006	Human	H1	N1	USA	NorthAmerica	2006
H1g1.5.3	EU199292	Alabama/21/2006	Human	H1	N1	USA	NorthAmerica	2006
H1g1.5.3	CY027283	Kentucky/UR06-0371/2007	Human	H1	N1	USA	NorthAmerica	2007
H1g1.5.3	EU521855	Tegucigalpa/FLU7911/2007	Human	H1	N0	Honduras	NorthAmerica	2007
H1g1.5.3	CY031439	Honduras/AF1268/2007	Human	H1	N1	Honduras	NorthAmerica	2007
H1g1.5.3	CY026915	Virginia/UR06-0384/2007	Human	H1	N1	USA	NorthAmerica	2007
H1g1.5.3	CY026315	California/UR06-0374/2007	Human	H1	N1	USA	NorthAmerica	2007
H1g1.5.3	CY025555	Mississippi/UR06-0130/2007	Human	H1	N1	USA	NorthAmerica	2007
H1g1.5.3	CY025619	Mississippi/UR06-0142/2007	Human	H1	N1	USA	NorthAmerica	2007
H1g1.5.3	CY025627	Mississippi/UR06-0086/2007	Human	H1	N1	USA	NorthAmerica	2007
H1g1.5.3	CY025827	Colorado/UR06-0111/2007	Human	H1	N1	USA	NorthAmerica	2007
H1g1.5.3	CY037663	Kentucky/UR06-0369/2007	Human	H1	N1	USA	NorthAmerica	2007
H1g1.5.3	CY027059	Tennessee/UR06-0151/2007	Human	H1	N1	USA	NorthAmerica	2007
H1g1.5.3	CY026819	Colorado/UR06-0336/2007	Human	H1	N1	USA	NorthAmerica	2007
H1g1.5.3	CY026507	Tennessee/UR06-0087/2007	Human	H1	N1	USA	NorthAmerica	2007
H1g1.5.3	CY025333	Colorado/UR06-0255/2007	Human	H1	N1	USA	NorthAmerica	2007
H1g1.5.3	CY026779	Colorado/UR06-0287/2007	Human	H1	N1	USA	NorthAmerica	2007
H1g1.5.3	CY027339	Texas/UR06-0357/2007	Human	H1	N1	USA	NorthAmerica	2007
H1g1.5.3	CY027411	Alabama/UR06-0536/2007	Human	H1	N1	USA	NorthAmerica	2007
H1g1.5.3	EU100673	Florida/3/2006	Human	H1	N1	USA	NorthAmerica	2006
H1g1.5.3	EU100681	Wisconsin/19/2006	Human	H1	N1	USA	NorthAmerica	2006
H1g1.5.3	EU199314	Memphis/01/2007	Human	H1	N1	USA	NorthAmerica	2007
H1g1.5.3	EU199297	NewYork/25/2006	Human	H1	N1	USA	NorthAmerica	2006
H1g1.5.3	CY027187	Vermont/UR06-0472/2007	Human	H1	N1	USA	NorthAmerica	2007
H1g1.5.3	CY028059	Tennessee/UR06-0238/2007	Human	H1	N1	USA	NorthAmerica	2007
H1g1.5.3	EU100709	NorthCarolina/10/2006	Human	H1	N1	USA	NorthAmerica	2006
H1g1.5.3	CY027643	Virginia/UR06-0297/2007	Human	H1	N1	USA	NorthAmerica	2007
H1g1.5.3	CY027859	Virginia/UR06-0360/2007	Human	H1	N1	USA	NorthAmerica	2007
H1g1.5.3	CY027971	Virginia/UR06-0266/2007	Human	H1	N1	USA	NorthAmerica	2007
H1g1.5.3	CY028155	Virginia/UR06-0351/2007	Human	H1	N1	USA	NorthAmerica	2007
H1g1.5.3	CY027267	Tennessee/UR06-0239/2007	Human	H1	N1	USA	NorthAmerica	2007
H1g1.5.3	CY026995	NorthCarolina/UR06-0364/2007	Human	H1	N1	USA	NorthAmerica	2007
H1g1.5.3	CY025811	Vermont/UR06-0051/2007	Human	H1	N1	USA	NorthAmerica	2007
H1g1.5.3	CY027627	Florida/UR06-0578/2007	Human	H1	N1	USA	NorthAmerica	2007
H1g1.5.3	EU199300	Memphis/13/2006	Human	H1	N1	USA	NorthAmerica	2006
H1g1.5.3	CY028387	NorthCarolina/UR06-0365/2007	Human	H1	N1	USA	NorthAmerica	2007
H1g1.5.3	EU199342	Massachusetts/03/2007	Human	H1	N1	USA	NorthAmerica	2007
H1g1.5.3	CY016388	Kentucky/2/2006	Human	H1	N1	USA	NorthAmerica	2006
H1g1.5.3	EU121591	Kentucky/02/2006	Human	H1	N0	USA	NorthAmerica	2006
H1g1.5.3	EU516110	Massachusetts/05/2007	Human	H1	N1	USA	NorthAmerica	2007
H1g1.5.3	EU100677	Alabama/20/2006	Human	H1	N1	USA	NorthAmerica	2006
H1g1.5.3	EU199301	Massachusetts/02/2007	Human	H1	N1	USA	NorthAmerica	2007
H1g1.5.3	CY027851	Kansas/UR06-0143/2007	Human	H1	N1	USA	NorthAmerica	2007
H1g1.5.3	EU199318	Massachusetts/01/2007	Human	H1	N1	USA	NorthAmerica	2007
H1g1.5.3	CY025819	Vermont/UR06-0574/2007	Human	H1	N1	USA	NorthAmerica	2007
H1g1.5.3	CY037463	Vermont/UR06-0513/2007	Human	H1	N1	USA	NorthAmerica	2007
H1g1.5.3	CY025469	Vermont/UR06-0576/2007	Human	H1	N1	USA	NorthAmerica	2007
H1g1.5.3	CY026571	Vermont/UR06-0573/2007	Human	H1	N1	USA	NorthAmerica	2007
H1g1.5.3	CY026619	Vermont/UR06-0511/2007	Human	H1	N1	USA	NorthAmerica	2007
H1g1.5.3	CY025763	Vermont/UR06-0485/2007	Human	H1	N1	USA	NorthAmerica	2007
H1g1.5.3	CY026171	Vermont/UR06-0575/2007	Human	H1	N1	USA	NorthAmerica	2007
H1g1.5.3	EU199313	Wisconsin/53/2006	Human	H1	N1	USA	NorthAmerica	2006
H1g1.5.3	CY027611	Florida/UR06-0447/2007	Human	H1	N1	USA	NorthAmerica	2007
H1g1.5.3	CY026547	Florida/UR06-0577/2007	Human	H1	N1	USA	NorthAmerica	2007
H1g1.5.3	CY027099	Florida/UR06-0049/2007	Human	H1	N1	USA	NorthAmerica	2007
H1g1.5.3	CY037455	Vermont/UR06-0330/2007	Human	H1	N1	USA	NorthAmerica	2007
H1g1.5.3	CY026755	Vermont/UR06-0556/2007	Human	H1	N1	USA	NorthAmerica	2007
H1g1.5.3	CY025301	Vermont/UR06-0050/2007	Human	H1	N1	USA	NorthAmerica	2007
H1g1.5.3	CY025651	Vermont/UR06-0090/2007	Human	H1	N1	USA	NorthAmerica	2007
H1g1.5.3	EU100687	Massachusetts/6/2006	Human	H1	N1	USA	NorthAmerica	2006
H1g1.5.3	EU199339	Massachusetts/04/2007	Human	H1	N1	USA	NorthAmerica	2007
H1g1.5.3	EU199303	Pennsylvania/08/2006	Human	H1	N1	USA	NorthAmerica	2006
H1g1.5.3	CY027595	Texas/UR06-0445/2007	Human	H1	N1	USA	NorthAmerica	2007
H1g1.5.3	EU199295	Wisconsin/25/2007	Human	H1	N1	USA	NorthAmerica	2007
H1g1.5.3	CY016383	Hawaii/3/2006	Human	H1	N1	USA	NorthAmerica	2006
H1g1.5.3	CY025587	Texas/UR06-0526/2007	Human	H1	N1	USA	NorthAmerica	2007
H1g1.5.3	CY028772	Virginia/UR06-0361/2007	Human	H1	N1	USA	NorthAmerica	2007
H1g1.5.3	EU199306	Alaska/01/2007	Human	H1	N1	USA	NorthAmerica	2007
H1g1.5.3	EU199302	Illinois/01/2006	Human	H1	N1	USA	NorthAmerica	2006
H1g1.5.3	EU199315	Florida/03/2007	Human	H1	N1	USA	NorthAmerica	2007
H1g1.5.3	CY026643	NewYork/UR06-0253/2007	Human	H1	N1	USA	NorthAmerica	2007
H1g1.5.3	CY025939	Kentucky/UR06-0539/2007	Human	H1	N1	USA	NorthAmerica	2007
H1g1.5.3	CY027243	Tennessee/UR06-0124/2007	Human	H1	N1	USA	NorthAmerica	2007
H1g1.5.3	CY026227	Kentucky/UR06-0538/2007	Human	H1	N1	USA	NorthAmerica	2007
H1g1.5.3	CY025667	Kentucky/UR06-0553/2007	Human	H1	N1	USA	NorthAmerica	2007
H1g1.5.3	CY026979	Kentucky/UR06-0161/2007	Human	H1	N1	USA	NorthAmerica	2007
H1g1.5.3	CY028147	Kentucky/UR06-0182/2007	Human	H1	N1	USA	NorthAmerica	2007
H1g1.5.3	CY027675	Kentucky/UR06-0449/2007	Human	H1	N1	USA	NorthAmerica	2007
H1g1.5.3	CY027371	Kentucky/UR06-0424/2007	Human	H1	N1	USA	NorthAmerica	2007
H1g1.5.3	EU199308	Illinois/01/2006	Human	H1	N1	USA	NorthAmerica	2006
H1g1.5.3	CY026531	California/UR06-0302/2007	Human	H1	N1	USA	NorthAmerica	2007
H1g1.5.3	CY028139	Kansas/UR06-0191/2007	Human	H1	N1	USA	NorthAmerica	2007
H1g1.5.3	CY027467	Ohio/UR06-0394/2007	Human	H1	N1	USA	NorthAmerica	2007
H1g1.5.3	CY027227	Colorado/UR06-0499/2007	Human	H1	N1	USA	NorthAmerica	2007
H1g1.5.3	EU199322	Hawaii/02/2007	Human	H1	N1	USA	NorthAmerica	2007
H1g1.5.3	EU100706	Iowa/02/2006	Human	H1	N1	USA	NorthAmerica	2006
H1g1.5.3	EU199340	Illinois/02/2006	Human	H1	N1	USA	NorthAmerica	2006
H1g1.5.3	CY028459	California/UR06-0442/2007	Human	H1	N1	USA	NorthAmerica	2007
H1g1.5.3	EU199286	NewMexico/04/2007	Human	H1	N1	USA	NorthAmerica	2007
H1g1.5.3	CY025493	Kentucky/UR06-0042/2007	Human	H1	N1	USA	NorthAmerica	2007
H1g1.5.3	CY027355	California/UR06-0564/2007	Human	H1	N1	USA	NorthAmerica	2007
H1g1.5.3	CY027139	Ohio/UR06-0177/2007	Human	H1	N1	USA	NorthAmerica	2007
H1g1.5.3	CY027211	California/UR06-0585/2007	Human	H1	N1	USA	NorthAmerica	2007
H1g1.5.3	EU100705	Indiana/08/2006	Human	H1	N1	USA	NorthAmerica	2006
H1g1.5.3	CY025221	Michigan/UR06-0015/2006	Human	H1	N1	USA	NorthAmerica	2006
H1g1.5.3	CY027763	Ohio/UR06-0112/2007	Human	H1	N1	USA	NorthAmerica	2007
H1g1.5.3	EU199350	Nebraska/02/2007	Human	H1	N1	USA	NorthAmerica	2007
H1g1.5.3	EU199290	Pennsylvania/01/2007	Human	H1	N1	USA	NorthAmerica	2007
H1g1.5.3	CY041450	California/UR06-0439/2007	Human	H1	N1	USA	NorthAmerica	2007
H1g1.5.3	CY028403	Ohio/UR06-0429/2007	Human	H1	N1	USA	NorthAmerica	2007
H1g1.5.3	CY027483	Illinois/UR06-0115/2007	Human	H1	N1	USA	NorthAmerica	2007
H1g1.5.3	CY026907	Virginia/UR06-0254/2007	Human	H1	N1	USA	NorthAmerica	2007
H1g1.5.3	EU199329	NewYork/01/2007	Human	H1	N1	USA	NorthAmerica	2007
H1g1.5.3	CY025595	Illinois/UR06-0415/2007	Human	H1	N1	USA	NorthAmerica	2007
H1g1.5.3	CY027419	Tennessee/UR06-0262/2007	Human	H1	N1	USA	NorthAmerica	2007
H1g1.5.3	CY027707	Virginia/UR06-0549/2007	Human	H1	N1	USA	NorthAmerica	2007
H1g1.5.3	CY027939	Virginia/UR06-0295/2007	Human	H1	N1	USA	NorthAmerica	2007
H1g1.5.3	CY026859	NorthCarolina/UR06-0099/2007	Human	H1	N1	USA	NorthAmerica	2007
H1g1.5.3	CY027147	NorthCarolina/UR06-0011/2006	Human	H1	N1	USA	NorthAmerica	2006
H1g1.5.3	CY027235	Virginia/UR06-0117/2007	Human	H1	N1	USA	NorthAmerica	2007
H1g1.5.3	EU199304	Wisconsin/51/2006	Human	H1	N1	USA	NorthAmerica	2006
H1g1.5.3	EU409968	swine/Ohio/K1207/06	Swine	H1	N1	USA	NorthAmerica	2006
H1g1.5.3	CY026219	Kentucky/UR06-0028/2007	Human	H1	N1	USA	NorthAmerica	2007
H1g1.5.3	CY027395	Illinois/UR06-0136/2007	Human	H1	N1	USA	NorthAmerica	2007
H1g1.5.3	CY026795	Illinois/UR06-0491/2007	Human	H1	N1	USA	NorthAmerica	2007
H1g1.5.3	CY027091	Illinois/UR06-0137/2007	Human	H1	N1	USA	NorthAmerica	2007
H1g1.5.3	CY027699	Illinois/UR06-0131/2007	Human	H1	N1	USA	NorthAmerica	2007
H1g1.5.3	EU199309	Wisconsin/49/2006	Human	H1	N1	USA	NorthAmerica	2006
H1g1.5.3	CY025437	Illinois/UR06-0333/2007	Human	H1	N1	USA	NorthAmerica	2007
H1g1.5.3	CY016389	Washington/1/2006	Human	H1	N1	USA	NorthAmerica	2006
H1g1.5.3	EU199316	Wisconsin/48/2006	Human	H1	N1	USA	NorthAmerica	2006
H1g1.5.3	CY028419	Illinois/UR06-0215/2007	Human	H1	N1	USA	NorthAmerica	2007
H1g1.5.3	CY028067	Illinois/UR06-0093/2007	Human	H1	N1	USA	NorthAmerica	2007
H1g1.5.3	CY027819	Illinois/UR06-0074/2007	Human	H1	N1	USA	NorthAmerica	2007
H1g1.5.3	CY027275	Illinois/UR06-0116/2007	Human	H1	N1	USA	NorthAmerica	2007
H1g1.5.3	CY027435	Illinois/UR06-0094/2007	Human	H1	N1	USA	NorthAmerica	2007
H1g1.5.3	CY026971	Illinois/UR06-0095/2007	Human	H1	N1	USA	NorthAmerica	2007
H1g1.5.3	EU199338	Texas/06/2007	Human	H1	N1	USA	NorthAmerica	2007
H1g1.5.3	CY025285	NewYork/UR06-0386/2007	Human	H1	N1	USA	NorthAmerica	2007
H1g1.5.3	CY027843	California/UR06-0125/2007	Human	H1	N1	USA	NorthAmerica	2007
H1g1.5.3	CY025373	California/UR06-0435/2007	Human	H1	N1	USA	NorthAmerica	2007
H1g1.5.3	CY026355	California/UR06-0232/2007	Human	H1	N1	USA	NorthAmerica	2007
H1g1.5.3	CY016384	Texas/3/2006	Human	H1	N1	USA	NorthAmerica	2006
H1g1.5.3	CY016371	Florida/1/2006	Human	H1	N1	USA	NorthAmerica	2006
H1g1.5.3	CY016374	NewJersey/1/2006	Human	H1	N1	USA	NorthAmerica	2006
H1g1.5.3	CY016375	NorthCarolina/1/2006	Human	H1	N1	USA	NorthAmerica	2006
H1g1.5.3	CY016370	Pennsylvania/1/2006	Human	H1	N1	USA	NorthAmerica	2006
H1g1.5.3	CY016379	Pennsylvania/2/2006	Human	H1	N1	USA	NorthAmerica	2006
H1g1.5.3	CY017371	NewYork/8/2006	Human	H1	N1	USA	NorthAmerica	2006
H1g1.5.3	CY016387	NewHampshire/2/2006	Human	H1	N1	USA	NorthAmerica	2006
H1g1.5.3	CY016366	NewJersey/10/2005	Human	H1	N1	USA	NorthAmerica	2005
H1g1.5.3	CY016385	Pennsylvania/3/2006	Human	H1	N1	USA	NorthAmerica	2006
H1g1.5.3	CY016378	RhodeIsland/1/2006	Human	H1	N1	USA	NorthAmerica	2006
H1g1.5.3	CY016381	WestVirginia/1/2006	Human	H1	N1	USA	NorthAmerica	2006
H1g1.5.3	EU521833	Managua/FLU4886/2006	Human	H1	N0	Nicaragua	NorthAmerica	2006
H1g1.5.3	EU521822	Managua/FLU4466/2006	Human	H1	N0	Nicaragua	NorthAmerica	2006
H1g1.5.3	EU521823	Managua/FLU4499/2006	Human	H1	N1	Nicaragua	NorthAmerica	2006
H1g1.5.3	EU605962	Managua/FLU4862/2006	Human	H1	N0	Nicaragua	NorthAmerica	2006
H1g1.5.3	EU521849	Managua/FLU5432/2007	Human	H1	N1	Nicaragua	NorthAmerica	2007
H1g1.5.3	EU521848	Managua/FLU5425/2007	Human	H1	N1	Nicaragua	NorthAmerica	2007
H1g1.5.3	CY031438	Honduras/AF1267/2007	Human	H1	N1	Honduras	NorthAmerica	2007
H1g1.5.3	CY034593	Honduras/AF1964/2008	Human	H1	N1	Honduras	NorthAmerica	2008
H1g1.5.3	CY034594	Honduras/AF1965/2008	Human	H1	N1	Honduras	NorthAmerica	2008
H1g1.5.3	EU521856	Tegucigalpa/FLU7928/2007	Human	H1	N0	Honduras	NorthAmerica	2007
H1g1.5.3	CY031440	Honduras/AF1269/2007	Human	H1	N1	Honduras	NorthAmerica	2007
H1g1.5.3	FJ638298	swine/IL/00685/2005	Swine	H1	N1	USA	NorthAmerica	2005
H1g1.5.3	FJ638306	swine/NC/00573/2005	Swine	H1	N1	USA	NorthAmerica	2005
H1g1.5.3	EU100684	Washington/8/2006	Human	H1	N1	USA	NorthAmerica	2006
H1g1.5.3	CY031140	Tennessee/UR06-0236/2007	Human	H1	N1	USA	NorthAmerica	2007
H1g1.5.3	EU199320	NewYork/24/2006	Human	H1	N1	USA	NorthAmerica	2006
H1g1.5.3	EU516024	Ohio/04/2006	Human	H1	N1	USA	NorthAmerica	2006
H1g1.5.3	CY016361	Oklahoma/7/2005	Human	H1	N1	USA	NorthAmerica	2005
H1g1.5.3	CY016390	Minnesota/2/2006	Human	H1	N1	USA	NorthAmerica	2006
H1g1.5.3	CY026499	Texas/UR06-0468/2007	Human	H1	N1	USA	NorthAmerica	2007
H1g1.5.3	CY028323	Texas/UR06-0026/2007	Human	H1	N1	USA	NorthAmerica	2007
H1g1.5.3	CY026339	Texas/UR06-0542/2007	Human	H1	N1	USA	NorthAmerica	2007
H1g1.5.3	CY028219	Texas/UR06-0420/2007	Human	H1	N1	USA	NorthAmerica	2007
H1g1.5.3	CY027883	Texas/UR06-0503/2007	Human	H1	N1	USA	NorthAmerica	2007
H1g1.5.3	CY025445	Texas/UR06-0467/2007	Human	H1	N1	USA	NorthAmerica	2007
H1g1.5.3	CY016360	Massachussetts/9/2005	Human	H1	N1	USA	NorthAmerica	2005
H1g1.5.3	CY016362	Wisconsin/73/2005	Human	H1	N1	USA	NorthAmerica	2005
H1g1.5.3	CY016368	NewJersey/11/2005	Human	H1	N1	USA	NorthAmerica	2005
H1g1.5.3	CY016382	NewYork/4/2006	Human	H1	N1	USA	NorthAmerica	2005
H1g1.5.3	CY016393	Hawaii/A4/2006	Human	H1	N1	USA	NorthAmerica	2006
H1g1.5.3	CY016327	Michigan/4/2003	Human	H1	N1	USA	NorthAmerica	2003
H1g1.5.3	CY016316	Arizona/6/2003	Human	H1	N1	USA	NorthAmerica	2003
H1g1.5.3	CY016338	NorthCarolina/3/2003	Human	H1	N1	USA	NorthAmerica	2003
H1g1.5.3	CY016342	Nebraska/4/2003	Human	H1	N1	USA	NorthAmerica	2003
H1g1.5.3	CY016346	Minnesota/18/2003	Human	H1	N1	USA	NorthAmerica	2003
H1g1.5.3	CY016354	Virginia/4/2005	Human	H1	N1	USA	NorthAmerica	2005
H1g1.5.3	CY016348	Idaho/1/2005	Human	H1	N1	USA	NorthAmerica	2005
H1g1.5.3	CY016350	Florida/4/2004	Human	H1	N1	USA	NorthAmerica	2004
H1g1.5.3	CY016352	Florida/3e/2004	Human	H1	N1	USA	NorthAmerica	2004
H1g1.5.3	CY016349	Florida/3/2004	Human	H1	N1	USA	NorthAmerica	2004
H1g1.5.3	CY016329	Michigan/6/2003	Human	H1	N1	USA	NorthAmerica	2003
H1g1.5.3	CY016339	Wisconsin/25/2003	Human	H1	N1	USA	NorthAmerica	2003
H1g1.5.3	CY016355	Kentucky/1/2005	Human	H1	N1	USA	NorthAmerica	2005
H1g1.5.3	CY016357	Kentucky/2/2005	Human	H1	N1	USA	NorthAmerica	2005
H1g1.5.3	CY016359	Kentucky/9e/2005	Human	H1	N1	USA	NorthAmerica	2005
H1g1.5.3	EF541396	Kentucky/9e/2005	Human	H1	N1	USA	NorthAmerica	2005
H1g1.5.3	CY016358	Kentucky/9/2005	Human	H1	N1	USA	NorthAmerica	2005
H1g1.5.3	CY016328	Michigan/5/2003	Human	H1	N1	USA	NorthAmerica	2003
H1g1.5.3	CY016331	Alaska/11/2003	Human	H1	N1	USA	NorthAmerica	2003
H1g1.5.3	CY016335	Nebraska/2/2003	Human	H1	N1	USA	NorthAmerica	2003
H1g1.5.3	CY016313	NewMexico/2/2003	Human	H1	N1	USA	NorthAmerica	2003
H1g1.5.3	CY002704	NewYork/348/2003	Human	H1	N1	USA	NorthAmerica	2003
H1g1.5.3	CY003376	NewYork/292/2003	Human	H1	N1	USA	NorthAmerica	2003
H1g1.5.3	CY008524	NewYork/483/2003	Human	H1	N1	USA	NorthAmerica	2003
H1g1.5.3	CY008996	NewYork/484/2003	Human	H1	N1	USA	NorthAmerica	2003
H1g1.5.3	CY002528	NewYork/220/2002	Human	H1	N1	USA	NorthAmerica	2002
H1g1.5.3	CY002984	NewYork/221/2003	Human	H1	N1	USA	NorthAmerica	2003
H1g1.5.3	CY002624	NewYork/230/2003	Human	H1	N1	USA	NorthAmerica	2003
H1g1.5.3	CY006667	NewYork/493/2003	Human	H1	N1	USA	NorthAmerica	2003
H1g1.5.3	CY003688	NewYork/486/2003	Human	H1	N1	USA	NorthAmerica	2003
H1g1.5.3	CY002688	NewYork/223/2003	Human	H1	N1	USA	NorthAmerica	2003
H1g1.5.3	CY006915	NewYork/488/2003	Human	H1	N1	USA	NorthAmerica	2003
H1g1.5.3	CY016318	California/1/2003	Human	H1	N1	USA	NorthAmerica	2003
H1g1.5.3	CY016341	Mississippi/1/2003	Human	H1	N1	USA	NorthAmerica	2003
H1g1.5.3	CY006427	NewYork/350/2003	Human	H1	N1	USA	NorthAmerica	2003
H1g1.5.3	CY002680	NewYork/222/2003	Human	H1	N1	USA	NorthAmerica	2003
H1g1.5.3	CY016340	Texas/18/2003	Human	H1	N1	USA	NorthAmerica	2003
H1g1.5.3	CY016344	NewMexico/7/2003	Human	H1	N1	USA	NorthAmerica	2003
H1g1.5.3	CY016323	Michigan/1/2003	Human	H1	N1	USA	NorthAmerica	2003
H1g1.5.3	CY016315	Idaho/1/2003	Human	H1	N1	USA	NorthAmerica	2003
H1g1.5.3	CY019883	Memphis/5/2003	Human	H1	N1	USA	NorthAmerica	2003
H1g1.5.3	CY016308	NewYork/1/2003	Human	H1	N1	USA	NorthAmerica	2003
H1g1.5.3	EF541416	NewYork/1/2003	Human	H1	N0	USA	NorthAmerica	2003
H1g1.5.3	CY016314	Hawaii/1/2003	Human	H1	N1	USA	NorthAmerica	2003
H1g1.5.3	CY016320	Georgia/3/2003	Human	H1	N1	USA	NorthAmerica	2003
H1g1.5.3	CY003296	NewYork/228/2003	Human	H1	N1	USA	NorthAmerica	2003
H1g1.5.3	CY016310	Texas/1/2003	Human	H1	N1	USA	NorthAmerica	2003
H1g1.5.3	CY003704	NewYork/496/2003	Human	H1	N1	USA	NorthAmerica	2003
H1g1.5.3	CY016321	Memphis/6/2003	Human	H1	N2	USA	NorthAmerica	2003
H1g1.5.3	CY019341	Memphis/6/2003	Human	H1	N1	USA	NorthAmerica	2003
H1g1.5.3	CY003384	NewYork/293/2003	Human	H1	N1	USA	NorthAmerica	2003
H1g1.5.3	CY002808	NewYork/399/2003	Human	H1	N1	USA	NorthAmerica	2003
H1g1.5.3	CY016325	Oregon/2/2003	Human	H1	N1	USA	NorthAmerica	2003
H1g1.5.3	CY016337	Wyoming/4/2003	Human	H1	N1	USA	NorthAmerica	2003
H1g1.5.3	CY016317	Arizona/2/2003	Human	H1	N1	USA	NorthAmerica	2003
H1g1.5.3	CY016330	Nevada/1/2003	Human	H1	N1	USA	NorthAmerica	2003
H1g1.5.3	CY002536	NewYork/227/2003	Human	H1	N1	USA	NorthAmerica	2003
H1g1.5.3	CY017315	Waikato/4/2005	Human	H1	N1	NewZealand	Oceania	2005
H1g1.5.3	CY019997	Waikato/17/2005	Human	H1	N1	NewZealand	Oceania	2005
H1g1.5.3	CY016459	Waikato/11/2005	Human	H1	N1	NewZealand	Oceania	2005
H1g1.5.3	CY013581	Waikato/13/2005	Human	H1	N1	NewZealand	Oceania	2005
H1g1.5.3	CY031332	Brisbane/193/2004	Human	H1	N1	Australia	Oceania	2004
H1g1.5.3	CY016699	SouthAustralia/58/2005	Human	H1	N1	Australia	Oceania	2005
H1g1.5.3	CY031346	Perth/1/2007	Human	H1	N1	Australia	Oceania	2007
H1g1.5.3	EF566317	Sydney/549/2005	Human	H1	N1	Australia	Oceania	2005
H1g1.5.3	EF566318	Wellington/14/2005	Human	H1	N1	NewZealand	Oceania	2005
H1g1.5.3	EF566280	Brisbane/265/2005	Human	H1	N1	Australia	Oceania	2005
H1g1.5.3	EF566279	Sydney/65/2005	Human	H1	N1	Australia	Oceania	2005
H1g1.5.3	CY013573	Otago/5/2005	Human	H1	N1	NewZealand	Oceania	2005
H1g1.5.3	CY016683	SouthAustralia/56/2005	Human	H1	N1	Australia	Oceania	2005
H1g1.5.3	CY016675	SouthAustralia/55/2005	Human	H1	N1	Australia	Oceania	2005
H1g1.5.3	EF566275	Victoria/346/2005	Human	H1	N0	Australia	Oceania	2005
H1g1.5.3	EF566274	SouthAustralia/68/2005	Human	H1	N0	Australia	Oceania	2005
H1g1.5.3	EF566321	Victoria/562/2005	Human	H1	N0	Australia	Oceania	2005
H1g1.5.3	EF566270	Victoria/504/2005	Human	H1	N1	Australia	Oceania	2005
H1g1.5.3	EF566276	SouthAustralia/127/2005	Human	H1	N0	Australia	Oceania	2005
H1g1.5.3	EF566315	Victoria/356/2005	Human	H1	N0	Australia	Oceania	2005
H1g1.5.3	CY022581	Auckland/619/2005	Human	H1	N1	NewZealand	Oceania	2005
H1g1.5.3	EF566282	Auckland/03/2005	Human	H1	N0	NewZealand	Oceania	2005
H1g1.5.3	CY013597	Waikato/14/2005	Human	H1	N1	NewZealand	Oceania	2005
H1g1.5.3	CY021757	SouthAustralia/51/2005	Human	H1	N1	Australia	Oceania	2005
H1g1.5.3	EF566316	Sydney/550/2005	Human	H1	N1	Australia	Oceania	2005
H1g1.5.3	EF566277	Brisbane/227/2005	Human	H1	N0	Australia	Oceania	2005
H1g1.5.3	EF566281	Wellington/11/2005	Human	H1	N1	NewZealand	Oceania	2005
H1g1.5.3	EF566322	Victoria/124/2005	Human	H1	N1	Australia	Oceania	2005
H1g1.5.3	EU124046	Newcastle/9/2005	Human	H1	N0	Australia	Oceania	2005
H1g1.5.3	CY016691	SouthAustralia/57/2005	Human	H1	N1	Australia	Oceania	2005
H1g1.5.3	CY020157	WesternAustralia/77/2005	Human	H1	N1	Australia	Oceania	2005
H1g1.5.3	EF566269	Perth/28/2005	Human	H1	N0	Australia	Oceania	2005
H1g1.5.3	EF566273	SouthAustralia/47/2005	Human	H1	N0	Australia	Oceania	2005
H1g1.5.3	EF566278	Victoria/304/2005	Human	H1	N0	Australia	Oceania	2005
H1g1.5.3	EU124045	Perth/248/2005	Human	H1	N0	Australia	Oceania	2005
H1g1.5.3	CY013589	Wellington/13/2005	Human	H1	N1	NewZealand	Oceania	2005
H1g1.5.3	CY015580	Wellington/14/2005	Human	H1	N1	NewZealand	Oceania	2005
H1g1.5.3	CY013565	Wellington/12/2005	Human	H1	N1	NewZealand	Oceania	2005
H1g1.5.3	CY013557	Wellington/10/2005	Human	H1	N1	NewZealand	Oceania	2005
H1g1.5.3	CY014007	Wellington/11/2005	Human	H1	N1	NewZealand	Oceania	2005
H1g1.5.3	EU124138	Christchurch/66/2006	Human	H1	N0	NewZealand	Oceania	2006
H1g1.5.3	CY030218	Wellington/75/2006	Human	H1	N1	NewZealand	Oceania	2006
H1g1.5.3	CY031362	Auckland/16/2007	Human	H1	N1	NewZealand	Oceania	2007
H1g1.5.3	EU521798	Tumbes/AST233/2006	Human	H1	N0	Peru	SouthAmerica	2006
H1g1.5.3	EU521806	Arequipa/FLU3836/2006	Human	H1	N0	Peru	SouthAmerica	2006
H1g1.5.3	EU521809	Juliaca/FLU3973/2006	Human	H1	N0	Peru	SouthAmerica	2006
H1g1.5.3	EU521841	Quito/FLU5162/2007	Human	H1	N1	Peru	SouthAmerica	2007
H1g1.5.3	EU521800	Tumbes/AST320/2006	Human	H1	N0	Peru	SouthAmerica	2006
H1g1.5.3	EU678999	Tumbes/FLU4933/2006	Human	H1	N0	Peru	SouthAmerica	2006
H1g1.5.3	EU521815	Chanchamayo/FLU4292/2006	Human	H1	N0	Peru	SouthAmerica	2006
H1g1.5.3	EU521807	Chanchamayo/FLU3954/2006	Human	H1	N0	Peru	SouthAmerica	2006
H1g1.5.3	EU521812	Chanchamayo/FLU4032/2006	Human	H1	N0	Peru	SouthAmerica	2006
H1g1.5.3	EU521831	Yurimaguas/FLU4785/2006	Human	H1	N1	Peru	SouthAmerica	2006
H1g1.5.3	EU521826	Sullana/FLU4630/2006	Human	H1	N0	Peru	SouthAmerica	2006
H1g1.5.3	EU521860	Piura/FSP1256/2006	Human	H1	N0	Peru	SouthAmerica	2006
H1g1.5.3	EU678997	Piura/FLU3909/2006	Human	H1	N0	Peru	SouthAmerica	2006
H1g1.5.3	EU678998	Sullana/FLU4648/2006	Human	H1	N0	Peru	SouthAmerica	2006
H1g1.5.3	EU521820	Piura/FLU4383/2006	Human	H1	N0	Peru	SouthAmerica	2006
H1g1.6.1	EF566344	Johannesburg/438/2006	Human	H1	N1	SouthAfrica	Africa	2006
H1g1.6.1	FJ654303	Georgia/131/2007	Human	H1	N1	Georgia	Asia	2007
H1g1.6.1	EU791301	Ulaanbaatar/1830/2007	Human	H1	N0	Mongolia	Asia	2007
H1g1.6.1	FJ225982	Ningbo/125/2007	Human	H1	N1	China	Asia	2007
H1g1.6.1	EU791307	Ulaanbaatar/1809/2007	Human	H1	N0	Mongolia	Asia	2007
H1g1.6.1	EU791297	Ulaanbaatar/1094/2007	Human	H1	N0	Mongolia	Asia	2007
H1g1.6.1	CY031470	Japan/AF1275/2008	Human	H1	N1	Japan	Asia	2008
H1g1.6.1	AB451160	Aichi/86/2007	Human	H1	N1	Japan	Asia	2007
H1g1.6.1	AB451161	Aichi/88/2007	Human	H1	N1	Japan	Asia	2007
H1g1.6.1	FJ794104	Gyeongnam/586/2008	Human	H1	N1	SouthKorea	Asia	2008
H1g1.6.1	FJ794098	Incheon/248/2008	Human	H1	N1	SouthKorea	Asia	2008
H1g1.6.1	CY031354	Malaysia/330/2007	Human	H1	N1	Malaysia	Asia	2007
H1g1.6.1	FJ225992	Ningbo/787/2008	Human	H1	N1	China	Asia	2008
H1g1.6.1	GQ396606	Yangon/M285/2008	Human	H1	N1	Myanmar	Asia	2008
H1g1.6.1	FJ225989	Ningbo/777/2008	Human	H1	N1	China	Asia	2008
H1g1.6.1	FJ794105	Gwangju/904/2008	Human	H1	N1	SouthKorea	Asia	2008
H1g1.6.1	CY031494	Korea/AF1305/2008	Human	H1	N1	SouthKorea	Asia	2008
H1g1.6.1	CY031496	Korea/AF1307/2008	Human	H1	N1	SouthKorea	Asia	2008
H1g1.6.1	CY031493	Korea/AF1304/2008	Human	H1	N1	SouthKorea	Asia	2008
H1g1.6.1	CY031495	Korea/AF1306/2008	Human	H1	N1	SouthKorea	Asia	2008
H1g1.6.1	CY031497	Korea/AF1308/2008	Human	H1	N1	SouthKorea	Asia	2008
H1g1.6.1	FJ794106	Chungnam/1077/2008	Human	H1	N1	SouthKorea	Asia	2008
H1g1.6.1	FJ794099	Gangwon/252/2008	Human	H1	N1	SouthKorea	Asia	2008
H1g1.6.1	GQ396630	Naypyitaw/M783/2008	Human	H1	N1	Myanmar	Asia	2008
H1g1.6.1	CY034541	Korea/AF1899/2008	Human	H1	N1	SouthKorea	Asia	2008
H1g1.6.1	GQ396614	Naypyitaw/M499/2008	Human	H1	N1	Myanmar	Asia	2008
H1g1.6.1	GQ396622	Naypyitaw/M721/2008	Human	H1	N1	Myanmar	Asia	2008
H1g1.6.1	FJ794097	Gangwon/4678/2007	Human	H1	N1	SouthKorea	Asia	2007
H1g1.6.1	FJ225983	Ningbo/772/2008	Human	H1	N1	China	Asia	2008
H1g1.6.1	CY034581	Korea/AF1951/2008	Human	H1	N1	SouthKorea	Asia	2008
H1g1.6.1	CY044349	SouthKorea/AF10/2008	Human	H1	N1	SouthKorea	Asia	2007
H1g1.6.1	CY034540	Korea/AF1898/2008	Human	H1	N1	SouthKorea	Asia	2008
H1g1.6.1	CY031448	Korea/AF1309/2007	Human	H1	N1	SouthKorea	Asia	2007
H1g1.6.1	CY031449	Korea/AF1310/2007	Human	H1	N1	SouthKorea	Asia	2007
H1g1.6.1	CY031450	Korea/AF1311/2007	Human	H1	N1	SouthKorea	Asia	2007
H1g1.6.1	FJ794096	Incheon/4655/2007	Human	H1	N1	SouthKorea	Asia	2007
H1g1.6.1	FJ794100	Gangwon/260/2008	Human	H1	N1	SouthKorea	Asia	2008
H1g1.6.1	FJ794101	Jeonbuk/279/2008	Human	H1	N1	SouthKorea	Asia	2008
H1g1.6.1	FJ794102	Seoul/416/2008	Human	H1	N1	SouthKorea	Asia	2008
H1g1.6.1	FJ794103	Gangwon/557/2008	Human	H1	N1	SouthKorea	Asia	2008
H1g1.6.1	CY031451	Korea/AF1312/2007	Human	H1	N1	SouthKorea	Asia	2007
H1g1.6.1	CY031380	Thailand/486/2007	Human	H1	N1	Thailand	Asia	2007
H1g1.6.1	CY031360	Singapore/43/2007	Human	H1	N1	Singapore	Asia	2007
H1g1.6.1	CY031368	Malaysia/862/2007	Human	H1	N1	Malaysia	Asia	2007
H1g1.6.1	AB451158	Aichi/83/2007	Human	H1	N1	Japan	Asia	2007
H1g1.6.1	AB451159	Aichi/84/2007	Human	H1	N1	Japan	Asia	2007
H1g1.6.1	FJ375207	Cambodia/365/2007	Human	H1	N1	Cambodia	Asia	2007
H1g1.6.1	FJ375205	Cambodia/0371/2007	Human	H1	N1	Cambodia	Asia	2007
H1g1.6.1	FJ375206	Cambodia/0374/2007	Human	H1	N1	Cambodia	Asia	2007
H1g1.6.1	FJ375208	Cambodia/502/2007	Human	H1	N1	Cambodia	Asia	2007
H1g1.6.1	FJ743471	Cambodia/21/2007	Human	H1	N1	Cambodia	Asia	2007
H1g1.6.1	AB451169	Aichi/70/2008	Human	H1	N1	Japan	Asia	2008
H1g1.6.1	AB451170	Aichi/71/2008	Human	H1	N1	Japan	Asia	2008
H1g1.6.1	AB451165	Aichi/11/2008	Human	H1	N1	Japan	Asia	2008
H1g1.6.1	AB451168	Aichi/44/2008	Human	H1	N1	Japan	Asia	2008
H1g1.6.1	AB451164	Aichi/100/2007	Human	H1	N1	Japan	Asia	2007
H1g1.6.1	CY034527	Japan/AF1884/2008	Human	H1	N1	Japan	Asia	2008
H1g1.6.1	CY031469	Japan/AF1274/2008	Human	H1	N1	Japan	Asia	2008
H1g1.6.1	FJ794110	Gyeongnam/3062/2007	Human	H1	N1	SouthKorea	Asia	2007
H1g1.6.1	EU382982	Guangzhou/506/2006	Human	H1	N1	China	Asia	2006
H1g1.6.1	EU382981	Guangzhou/483/2006	Human	H1	N1	China	Asia	2006
H1g1.6.1	CY031350	Macau/189/2007	Human	H1	N1	Macau	Asia	2007
H1g1.6.1	AB453343	Aichi/27/2007	Human	H1	N1	Japan	Asia	2007
H1g1.6.1	AB453342	Aichi/7/2007	Human	H1	N1	Japan	Asia	2007
H1g1.6.1	AB453345	Aichi/60/2007	Human	H1	N1	Japan	Asia	2007
H1g1.6.1	EU791299	Sainshand/1142/2007	Human	H1	N0	Mongolia	Asia	2007
H1g1.6.1	EU791303	Orkhon/1901/2007	Human	H1	N0	Mongolia	Asia	2007
H1g1.6.1	CY031352	Jeju/2279/2007	Human	H1	N1	SouthKorea	Asia	2007
H1g1.6.1	FJ794107	Jeju/2824/2007	Human	H1	N1	SouthKorea	Asia	2007
H1g1.6.1	FJ794108	Jeju/2888/2007	Human	H1	N1	SouthKorea	Asia	2007
H1g1.6.1	FJ794109	Jeju/2879/2007	Human	H1	N1	SouthKorea	Asia	2007
H1g1.6.1	AB451162	Aichi/92/2007	Human	H1	N1	Japan	Asia	2007
H1g1.6.1	FJ794114	Gangwon/3157/2007	Human	H1	N1	SouthKorea	Asia	2007
H1g1.6.1	CY031342	HongKong/2652/2006	Human	H1	N1	HongKong	Asia	2006
H1g1.6.1	EU304354	Busan/02/2007	Human	H1	N1	SouthKorea	Asia	2007
H1g1.6.1	FJ794111	Gyeongnam/3074/2007	Human	H1	N1	SouthKorea	Asia	2007
H1g1.6.1	FJ794113	Incheon/3147/2007	Human	H1	N1	SouthKorea	Asia	2007
H1g1.6.1	AB453344	Aichi/54/2007	Human	H1	N1	Japan	Asia	2007
H1g1.6.1	AB453346	Aichi/61/2007	Human	H1	N1	Japan	Asia	2007
H1g1.6.1	AB453347	Aichi/62/2007	Human	H1	N1	Japan	Asia	2007
H1g1.6.1	AB453348	Aichi/77/2007	Human	H1	N1	Japan	Asia	2007
H1g1.6.1	FJ794112	Incheon/3180/2007	Human	H1	N1	SouthKorea	Asia	2007
H1g1.6.1	FJ794115	Jeju/3083/2007	Human	H1	N1	SouthKorea	Asia	2007
H1g1.6.1	FJ225984	Ningbo/802/2006	Human	H1	N1	China	Asia	2006
H1g1.6.1	EU382983	Guangzhou/555/2006	Human	H1	N1	China	Asia	2006
H1g1.6.1	EU382985	Guangzhou/665/2006	Human	H1	N1	China	Asia	2006
H1g1.6.1	EU304355	Busan/03/2007	Human	H1	N1	SouthKorea	Asia	2007
H1g1.6.1	EU382984	Guangzhou/657/2006	Human	H1	N1	China	Asia	2006
H1g1.6.1	FJ654302	St.Petersburg/10/2007	Human	H1	N1	Russia	Europe	2007
H1g1.6.1	EU199325	Maryland/01/2007	Human	H1	N1	USA	NorthAmerica	2007
H1g1.6.1	EU779612	Hawaii/46/2007	Human	H1	N1	USA	NorthAmerica	2007
H1g1.6.1	CY031508	Texas/AF1323/2008	Human	H1	N1	USA	NorthAmerica	2008
H1g1.6.1	CY031501	Texas/AF1316/2008	Human	H1	N1	USA	NorthAmerica	2008
H1g1.6.1	CY031502	Texas/AF1317/2008	Human	H1	N1	USA	NorthAmerica	2008
H1g1.6.1	CY031503	Texas/AF1318/2008	Human	H1	N1	USA	NorthAmerica	2008
H1g1.6.1	FJ686964	Washington/10/2008	Human	H1	N1	USA	NorthAmerica	2008
H1g1.6.1	GQ475749	California/11/2008	Human	H1	N1	USA	NorthAmerica	2008
H1g1.6.1	EU516249	Hawaii/38/2007	Human	H1	N1	USA	NorthAmerica	2007
H1g1.6.1	EU567019	Hawaii/38/2007	Human	H1	N1	USA	NorthAmerica	2007
H1g1.6.1	FJ686991	Minnesota/24/2008	Human	H1	N1	USA	NorthAmerica	2008
H1g1.6.1	FJ549060	Missouri/06/2008	Human	H1	N1	USA	NorthAmerica	2008
H1g1.6.1	FJ532076	California/07/2008	Human	H1	N1	USA	NorthAmerica	2008
H1g1.6.1	EU199355	NewYork/08/2007	Human	H1	N1	USA	NorthAmerica	2007
H1g1.6.1	CY031425	Hawaii/AF1254/2007	Human	H1	N1	USA	NorthAmerica	2007
H1g1.6.1	CY031454	Texas/AF1330/2007	Human	H1	N1	USA	NorthAmerica	2007
H1g1.6.1	CY034565	Washington/AF1926/2008	Human	H1	N1	USA	NorthAmerica	2008
H1g1.6.1	CY034552	Washington/AF1913/2008	Human	H1	N1	USA	NorthAmerica	2008
H1g1.6.1	GQ475896	NorthCarolina/02/2009	Human	H1	N1	USA	NorthAmerica	2009
H1g1.6.1	EU516292	Oregon/06/2007	Human	H1	N1	USA	NorthAmerica	2007
H1g1.6.1	CY031506	Texas/AF1321/2008	Human	H1	N1	USA	NorthAmerica	2008
H1g1.6.1	CY031520	Washington/AF1338/2008	Human	H1	N1	USA	NorthAmerica	2008
H1g1.6.1	CY031453	Texas/AF1329/2007	Human	H1	N1	USA	NorthAmerica	2007
H1g1.6.1	CY034558	Washington/AF1919/2008	Human	H1	N1	USA	NorthAmerica	2008
H1g1.6.1	EU516295	Oregon/07/2007	Human	H1	N1	USA	NorthAmerica	2007
H1g1.6.1	EU567000	Massachusetts/01/2008	Human	H1	N1	USA	NorthAmerica	2008
H1g1.6.1	CY034517	Georgia/AF1938/2007	Human	H1	N1	USA	NorthAmerica	2007
H1g1.6.1	CY031498	Texas/AF1313/2008	Human	H1	N1	USA	NorthAmerica	2008
H1g1.6.1	CY034510	Georgia/AF1897/2007	Human	H1	N1	USA	NorthAmerica	2007
H1g1.6.1	CY034511	Georgia/AF1902/2007	Human	H1	N1	USA	NorthAmerica	2007
H1g1.6.1	CY034513	Georgia/AF1932/2007	Human	H1	N1	USA	NorthAmerica	2007
H1g1.6.1	CY034514	Georgia/AF1933/2007	Human	H1	N1	USA	NorthAmerica	2007
H1g1.6.1	CY034516	Georgia/AF1937/2007	Human	H1	N1	USA	NorthAmerica	2007
H1g1.6.1	CY034518	Georgia/AF1939/2007	Human	H1	N1	USA	NorthAmerica	2007
H1g1.6.1	CY034519	Georgia/AF1940/2007	Human	H1	N1	USA	NorthAmerica	2007
H1g1.6.1	CY034520	Georgia/AF1941/2007	Human	H1	N1	USA	NorthAmerica	2007
H1g1.6.1	CY034521	Georgia/AF1942/2007	Human	H1	N1	USA	NorthAmerica	2007
H1g1.6.1	CY034549	Hawaii/AF1910/2008	Human	H1	N1	USA	NorthAmerica	2008
H1g1.6.1	CY031401	Georgia/AF1228/2007	Human	H1	N1	USA	NorthAmerica	2007
H1g1.6.1	CY031402	Georgia/AF1229/2007	Human	H1	N1	USA	NorthAmerica	2007
H1g1.6.1	CY031403	Georgia/AF1230/2007	Human	H1	N1	USA	NorthAmerica	2007
H1g1.6.1	CY031404	Georgia/AF1231/2007	Human	H1	N1	USA	NorthAmerica	2007
H1g1.6.1	CY031405	Georgia/AF1232/2007	Human	H1	N1	USA	NorthAmerica	2007
H1g1.6.1	CY031406	Georgia/AF1233/2007	Human	H1	N1	USA	NorthAmerica	2007
H1g1.6.1	CY031407	Georgia/AF1234/2007	Human	H1	N1	USA	NorthAmerica	2007
H1g1.6.1	CY031409	Georgia/AF1236/2007	Human	H1	N1	USA	NorthAmerica	2007
H1g1.6.1	CY031426	Hawaii/AF1255/2007	Human	H1	N1	USA	NorthAmerica	2007
H1g1.6.1	CY031396	Georgia/AF1223/2007	Human	H1	N1	USA	NorthAmerica	2007
H1g1.6.1	CY031397	Georgia/AF1224/2007	Human	H1	N1	USA	NorthAmerica	2007
H1g1.6.1	CY031398	Georgia/AF1225/2007	Human	H1	N1	USA	NorthAmerica	2007
H1g1.6.1	CY031399	Georgia/AF1226/2007	Human	H1	N1	USA	NorthAmerica	2007
H1g1.6.1	CY031428	Hawaii/AF1257/2007	Human	H1	N1	USA	NorthAmerica	2007
H1g1.6.1	CY016369	Arizona/1/2006	Human	H1	N1	USA	NorthAmerica	2006
H1g1.6.1	EU199337	Hawaii/10/2006	Human	H1	N1	USA	NorthAmerica	2006
H1g1.6.1	EU516099	Alaska/1/2006	Human	H1	N1	USA	NorthAmerica	2006
H1g1.6.1	EU100672	California/3/2006	Human	H1	N1	USA	NorthAmerica	2006
H1g1.6.1	EU199330	Hawaii/11/2006	Human	H1	N1	USA	NorthAmerica	2006
H1g1.6.1	EU199335	Hawaii/01/2007	Human	H1	N1	USA	NorthAmerica	2007
H1g1.6.1	CY034538	Hawaii/AF1895/2008	Human	H1	N1	USA	NorthAmerica	2008
H1g1.6.1	EU779632	California/06/2008	Human	H1	N1	USA	NorthAmerica	2008
H1g1.6.1	EU716531	Hawaii/45/2007	Human	H1	N1	USA	NorthAmerica	2007
H1g1.6.1	CY031465	Hawaii/AF1249/2008	Human	H1	N1	USA	NorthAmerica	2008
H1g1.6.1	CY031452	Texas/AF1327/2007	Human	H1	N1	USA	NorthAmerica	2007
H1g1.6.1	EU716570	Hawaii/44/2007	Human	H1	N1	USA	NorthAmerica	2007
H1g1.6.1	CY034512	Hawaii/AF1906/2007	Human	H1	N1	USA	NorthAmerica	2007
H1g1.6.1	CY034545	Hawaii/AF1904/2008	Human	H1	N1	USA	NorthAmerica	2008
H1g1.6.1	CY034547	Hawaii/AF1908/2008	Human	H1	N1	USA	NorthAmerica	2008
H1g1.6.1	CY031464	Hawaii/AF1248/2008	Human	H1	N1	USA	NorthAmerica	2008
H1g1.6.1	EU716601	Hawaii/43/2007	Human	H1	N1	USA	NorthAmerica	2007
H1g1.6.1	EU716603	Hawaii/42/2007	Human	H1	N1	USA	NorthAmerica	2007
H1g1.6.1	EU779619	Hawaii/05/2008	Human	H1	N1	USA	NorthAmerica	2008
H1g1.6.1	EU199312	Washington/16/2007	Human	H1	N1	USA	NorthAmerica	2007
H1g1.6.1	EU516094	Minnesota/25/2007	Human	H1	N1	USA	NorthAmerica	2007
H1g1.6.1	CY031432	Hawaii/AF1261/2007	Human	H1	N1	USA	NorthAmerica	2007
H1g1.6.1	CY031408	Georgia/AF1235/2007	Human	H1	N1	USA	NorthAmerica	2007
H1g1.6.1	EU516060	Hawaii/17/2007	Human	H1	N1	USA	NorthAmerica	2007
H1g1.6.1	EU516059	Hawaii/16/2007	Human	H1	N1	USA	NorthAmerica	2007
H1g1.6.1	CY031421	Hawaii/AF1250/2007	Human	H1	N1	USA	NorthAmerica	2007
H1g1.6.1	CY031422	Hawaii/AF1251/2007	Human	H1	N1	USA	NorthAmerica	2007
H1g1.6.1	EU516057	Hawaii/15/2007	Human	H1	N1	USA	NorthAmerica	2007
H1g1.6.1	EU516079	Hawaii/19/2007	Human	H1	N1	USA	NorthAmerica	2007
H1g1.6.1	CY026523	Colorado/UR06-0053/2007	Human	H1	N1	USA	NorthAmerica	2007
H1g1.6.1	EU516087	Hawaii/19/2007	Human	H1	N1	USA	NorthAmerica	2007
H1g1.6.1	CY031423	Hawaii/AF1252/2007	Human	H1	N1	USA	NorthAmerica	2007
H1g1.6.1	CY031429	Hawaii/AF1258/2007	Human	H1	N1	USA	NorthAmerica	2007
H1g1.6.1	CY031430	Hawaii/AF1259/2007	Human	H1	N1	USA	NorthAmerica	2007
H1g1.6.1	CY031431	Hawaii/AF1260/2007	Human	H1	N1	USA	NorthAmerica	2007
H1g1.6.1	CY031434	Hawaii/AF1263/2007	Human	H1	N1	USA	NorthAmerica	2007
H1g1.6.1	CY031435	Hawaii/AF1264/2007	Human	H1	N1	USA	NorthAmerica	2007
H1g1.6.1	CY031436	Hawaii/AF1265/2007	Human	H1	N1	USA	NorthAmerica	2007
H1g1.6.1	CY031388	Auckland/8/2007	Human	H1	N1	NewZealand	Oceania	2007
H1g1.6.1	CY031348	Victoria/501/2007	Human	H1	N1	Australia	Oceania	2007
H1g1.6.1	CY034515	Guam/AF1934/2007	Human	H1	N1	NorthernMarianaIslands	Oceania	2007
H1g1.6.1	CY031417	NorthernMarianaIslands/AF1244/2007	Human	H1	N1	NorthernMarianaIslands	Oceania	2007
H1g1.6.1	CY031413	NorthernMarianaIslands/AF1240/2007	Human	H1	N1	NorthernMarianaIslands	Oceania	2007
H1g1.6.1	CY031414	NorthernMarianaIslands/AF1241/2007	Human	H1	N1	NorthernMarianaIslands	Oceania	2007
H1g1.6.1	CY031415	NorthernMarianaIslands/AF1242/2007	Human	H1	N1	NorthernMarianaIslands	Oceania	2007
H1g1.6.1	CY031412	NorthernMarianaIslands/AF1239/2007	Human	H1	N1	NorthernMarianaIslands	Oceania	2007
H1g1.6.1	CY031370	Guam/1/2007	Human	H1	N1	Guam	Oceania	2007
H1g1.6.1	CY031410	NorthernMarianaIslands/AF1237/2007	Human	H1	N1	NorthernMarianaIslands	Oceania	2007
H1g1.6.1	CY031411	NorthernMarianaIslands/AF1238/2007	Human	H1	N1	NorthernMarianaIslands	Oceania	2007
H1g1.6.1	CY031416	NorthernMarianaIslands/AF1243/2007	Human	H1	N1	NorthernMarianaIslands	Oceania	2007
H1g1.6.1	CY031418	NorthernMarianaIslands/AF1245/2007	Human	H1	N1	NorthernMarianaIslands	Oceania	2007
H1g1.6.1	CY031419	NorthernMarianaIslands/AF1246/2007	Human	H1	N1	NorthernMarianaIslands	Oceania	2007
H1g1.6.1	CY031444	NorthernMarianaIslands/AF1295/2007	Human	H1	N1	NorthernMarianaIslands	Oceania	2007
H1g1.6.1	CY031445	NorthernMarianaIslands/AF1296/2007	Human	H1	N1	NorthernMarianaIslands	Oceania	2007
H1g1.6.2	FJ794093	Chungbuk/4543/2007	Human	H1	N1	SouthKorea	Asia	2007
H1g1.6.2	FJ794095	Chungnam/4547/2007	Human	H1	N1	SouthKorea	Asia	2007
H1g1.6.2	EF566324	Malaysia/36/2006	Human	H1	N1	Malaysia	Asia	2006
H1g1.6.2	EF566325	Malaysia/37/2006	Human	H1	N1	Malaysia	Asia	2006
H1g1.6.2	EF566355	Singapore/19/2006	Human	H1	N0	Singapore	Asia	2006
H1g1.6.2	EF566353	Thailand/371/2006	Human	H1	N0	Thailand	Asia	2006
H1g1.6.2	EF566351	Thailand/380/2006	Human	H1	N1	Thailand	Asia	2006
H1g1.6.2	CY031344	Thailand/798/2006	Human	H1	N1	Thailand	Asia	2006
H1g1.6.2	AB501401	Thailand/388/2006	Human	H1	N1	Thailand	Asia	2006
H1g1.6.2	AB501406	Thailand/395/2006	Human	H1	N1	Thailand	Asia	2006
H1g1.6.2	EU021246	Thailand/CU41/2006	Human	H1	N1	Thailand	Asia	2006
H1g1.6.2	EU021248	Thailand/CU53/2006	Human	H1	N1	Thailand	Asia	2006
H1g1.6.2	EU021250	Thailand/CU67/2006	Human	H1	N1	Thailand	Asia	2006
H1g1.6.2	AB501396	Thailand/348/2006	Human	H1	N1	Thailand	Asia	2006
H1g1.6.2	EU021252	Thailand/CU88/2006	Human	H1	N1	Thailand	Asia	2006
H1g1.6.2	AB501421	Thailand/76/2006	Human	H1	N1	Thailand	Asia	2006
H1g1.6.2	AB501394	Thailand/337/2006	Human	H1	N1	Thailand	Asia	2006
H1g1.6.2	AB501399	Thailand/386/2006	Human	H1	N1	Thailand	Asia	2006
H1g1.6.2	AB501409	Thailand/398/2006	Human	H1	N1	Thailand	Asia	2006
H1g1.6.2	AB501416	Thailand/423/2006	Human	H1	N1	Thailand	Asia	2006
H1g1.6.2	AB501397	Thailand/364/2006	Human	H1	N1	Thailand	Asia	2006
H1g1.6.2	AB501418	Thailand/425/2006	Human	H1	N1	Thailand	Asia	2006
H1g1.6.2	AB501393	Thailand/336/2006	Human	H1	N1	Thailand	Asia	2006
H1g1.6.2	AB501405	Thailand/393/2006	Human	H1	N1	Thailand	Asia	2006
H1g1.6.2	AB501402	Thailand/390/2006	Human	H1	N1	Thailand	Asia	2006
H1g1.6.2	FJ794116	Ulsan/752/2005	Human	H1	N1	SouthKorea	Asia	2005
H1g1.6.2	EU021254	Thailand/CU51/2006	Human	H1	N1	Thailand	Asia	2006
H1g1.6.2	EF566319	Singapore/107/2005	Human	H1	N1	Singapore	Asia	2005
H1g1.6.2	EF566356	Singapore/42/2006	Human	H1	N0	Singapore	Asia	2006
H1g1.6.2	FJ794119	Gangwon/799/2005	Human	H1	N1	SouthKorea	Asia	2005
H1g1.6.2	CY030213	Singapore/69/2006	Human	H1	N1	Singapore	Asia	2006
H1g1.6.2	FJ794125	Jeonbuk/1096/2005	Human	H1	N1	SouthKorea	Asia	2005
H1g1.6.2	CY030216	Singapore/103/2006	Human	H1	N1	Singapore	Asia	2006
H1g1.6.2	EF566328	Malaysia/100/2006	Human	H1	N0	Malaysia	Asia	2006
H1g1.6.2	FJ794127	Jeju/244/2006	Human	H1	N1	SouthKorea	Asia	2006
H1g1.6.2	AB501420	Thailand/72/2006	Human	H1	N1	Thailand	Asia	2006
H1g1.6.2	FJ794118	Gyeonggi/966/2005	Human	H1	N1	SouthKorea	Asia	2005
H1g1.6.2	FJ794121	Jeonnam/1094/2005	Human	H1	N1	SouthKorea	Asia	2005
H1g1.6.2	FJ794124	Chungbuk/1183/2005	Human	H1	N1	SouthKorea	Asia	2005
H1g1.6.2	FJ794123	Daejeon/41/2006	Human	H1	N1	SouthKorea	Asia	2006
H1g1.6.2	EF566342	Philippines/906/2006	Human	H1	N1	Philippines	Asia	2006
H1g1.6.2	EF566350	Philippines/601/2006	Human	H1	N0	Philippines	Asia	2006
H1g1.6.2	EF566348	Philippines/574/2006	Human	H1	N0	Philippines	Asia	2006
H1g1.6.2	CY030235	Singapore/66/2006	Human	H1	N1	Singapore	Asia	2006
H1g1.6.2	EF566349	Philippines/568/2006	Human	H1	N0	Philippines	Asia	2006
H1g1.6.2	EF566346	Philippines/1392/2006	Human	H1	N1	Philippines	Asia	2006
H1g1.6.2	CY030215	Singapore/36/2006	Human	H1	N1	Singapore	Asia	2006
H1g1.6.2	EF566354	Singapore/41/2006	Human	H1	N1	Singapore	Asia	2006
H1g1.6.2	FJ794122	Incheon/1054/2005	Human	H1	N1	SouthKorea	Asia	2005
H1g1.6.2	FJ654301	Fukushima/141/2006	Human	H1	N1	Japan	Asia	2006
H1g1.6.2	FJ794126	Incheon/150/2006	Human	H1	N1	SouthKorea	Asia	2006
H1g1.6.2	EF566337	Macau/13076/2006	Human	H1	N1	Macau	Asia	2006
H1g1.6.2	FJ794120	Jeonbuk/1189/2005	Human	H1	N1	SouthKorea	Asia	2005
H1g1.6.2	AB255392	Aichi/21/2006	Human	H1	N1	Japan	Asia	2006
H1g1.6.2	AB255398	Aichi/150/2006	Human	H1	N1	Japan	Asia	2006
H1g1.6.2	AB255395	Aichi/103/2006	Human	H1	N1	Japan	Asia	2006
H1g1.6.2	CY036684	Norway/2159/2006	Human	H1	N1	Norway	Europe	2006
H1g1.6.2	FJ231783	Niedersachsen/4/2006	Human	H1	N1	Germany	Europe	2006
H1g1.6.2	FJ231784	Niedersachsen/5/2006	Human	H1	N1	Germany	Europe	2006
H1g1.6.2	EU100595	Washington/4/2006	Human	H1	N1	USA	NorthAmerica	2006
H1g1.6.2	CY016386	Missouri/3/2006	Human	H1	N1	USA	NorthAmerica	2006
H1g1.6.2	EU199289	NewJersey/09/2007	Human	H1	N1	USA	NorthAmerica	2007
H1g1.6.2	EU521824	Managua/FLU4501/2006	Human	H1	N1	Nicaragua	NorthAmerica	2006
H1g1.6.2	CY027603	NewYork/UR06-0326/2007	Human	H1	N1	USA	NorthAmerica	2007
H1g1.6.2	CY026627	NewYork/UR06-0199/2007	Human	H1	N1	USA	NorthAmerica	2007
H1g1.6.2	EU516143	NewJersey/09/2007	Human	H1	N1	USA	NorthAmerica	2007
H1g1.6.2	EF566345	Auckland/30/2006	Human	H1	N1	NewZealand	Oceania	2006
H1g1.6.2	EU100724	SolomonIslands/03/2006	Human	H1	N1	SolomonIslands	Oceania	2006
H1g1.6.2	EU124137	SolomonIslands/3/2006	Human	H1	N1	SolomonIslands	Oceania	2006
H1g1.6.2	EF566343	Perth/07/2006	Human	H1	N1	Australia	Oceania	2006
H1g1.6.2	CY031340	SolomonIslands/3/2006	Human	H1	N1	SolomonIslands	Oceania	2006
H1g1.6.2	EU124135	SolomonIslands/3/2006	Human	H1	N1	SolomonIslands	Oceania	2006
H1g1.6.2	EU124177	SolomonIslands/3/2006	Human	H1	N1	SolomonIslands	Oceania	2006
H1g1.6.2	EU521832	Pucallpa/FLU4812/2006	Human	H1	N1	Peru	SouthAmerica	2006
H1g1.6.2	EU521834	Tumbes/FLU4932/2006	Human	H1	N0	Peru	SouthAmerica	2006
H1g1.6.2	EU521861	Tumbes/FST804/2006	Human	H1	N0	Peru	SouthAmerica	2006
H1g1.6.2	EU521829	Chanchamayo/FLU4688/2006	Human	H1	N0	Peru	SouthAmerica	2006
H1g1.6.2	EU605958	Quito/FLU4772/2006	Human	H1	N0	Ecuador	SouthAmerica	2006
H1g1.6.2	EU521803	Tumbes/AST362/2006	Human	H1	N0	Peru	SouthAmerica	2006
H1g1.6.2	EU605951	Tumbes/FLU4354/2006	Human	H1	N0	Peru	SouthAmerica	2006
H1g1.6.2	EU521801	Tumbes/AST324/2006	Human	H1	N0	Peru	SouthAmerica	2006
H1g1.6.2	EU605959	Yurimaguas/FLU4788/2006	Human	H1	N0	Peru	SouthAmerica	2006
H1g1.6.2	EU521825	Pucallpa/FLU4548/2006	Human	H1	N0	Peru	SouthAmerica	2006
H1g1.6.2	EU521837	Iquitos/FLU4977/2006	Human	H1	N0	Peru	SouthAmerica	2006
H1g1.6.2	EU521859	Yurimaguas/FSL2823/2006	Human	H1	N0	Peru	SouthAmerica	2006
H1g1.6.2	EU521821	Yurimaguas/FLU4416/2006	Human	H1	N1	Peru	SouthAmerica	2006
H1g1.6.2	EU605953	Yurimaguas/FLU4405/2006	Human	H1	N0	Peru	SouthAmerica	2006
H1g1.6.2	EU521866	Iquitos/MFI904/2006	Human	H1	N0	Peru	SouthAmerica	2006
H1g1.6.2	EU605954	Yurimaguas/FLU4422/2006	Human	H1	N0	Peru	SouthAmerica	2006
H1g1.6.2	EU605956	Iquitos/FLU4535/2006	Human	H1	N0	Peru	SouthAmerica	2006
H1g1.6.2	EU605957	Iquitos/FLU4541/2006	Human	H1	N0	Peru	SouthAmerica	2006
H1g1.6.2	EU521816	Puno/FLU4315/2006	Human	H1	N1	Peru	SouthAmerica	2006
H1g1.6.2	EU521802	Tumbes/AST362/2006	Human	H1	N0	Peru	SouthAmerica	2006
H1g1.6.2	EU521814	Piura/FLU4177/2006	Human	H1	N1	Peru	SouthAmerica	2006
H1g1.6.2	EU521818	Pucallpa/FLU4323/2006	Human	H1	N1	Peru	SouthAmerica	2006
H1g1.6.2	EU521819	Pucallpa/FLU4335/2006	Human	H1	N1	Peru	SouthAmerica	2006
H1g1.6.2	EU521827	Sullana/FLU4635/2006	Human	H1	N1	Peru	SouthAmerica	2006
H1g1.6.2	EU521810	Puno/FLU3985/2006	Human	H1	N0	Peru	SouthAmerica	2006
H1g1.6.2	EU521808	Juliaca/FLU3969/2006	Human	H1	N1	Peru	SouthAmerica	2006
H1g1.6.2	EU605955	Iquitos/FLU4526/2006	Human	H1	N0	Peru	SouthAmerica	2006
H1g1.6.2	EU605950	Iquitos/FLU4307/2006	Human	H1	N0	Peru	SouthAmerica	2006
H1g1.6.2	EU521811	Piura/FLU4000/2006	Human	H1	N0	Peru	SouthAmerica	2006
H1g1.6.2	EU521857	Maldonado/FMD911/2006	Human	H1	N0	Peru	SouthAmerica	2006
H1g1.6.2	EU605949	Sullana/FLU4065/2006	Human	H1	N0	Peru	SouthAmerica	2006
H1g1.6.2	EU521828	Sullana/FLU4640/2006	Human	H1	N0	Peru	SouthAmerica	2006
H1g1.6.2	EU605952	Tumbes/FLU4363/2006	Human	H1	N0	Peru	SouthAmerica	2006
H1g1.6.2	EU521799	Tumbes/AST310/2006	Human	H1	N1	Peru	SouthAmerica	2006
H1g1.6.2	EU521844	Tumbes/FLU5346/2007	Human	H1	N0	Peru	SouthAmerica	2007
H1g1.6.2	EU555267	Lima/FLU5657/2007	Human	H1	N0	Peru	SouthAmerica	2007
H1g1.6.2	EU521853	Maldonado/FLU5857/2007	Human	H1	N1	Peru	SouthAmerica	2007
H1g1.6.2	EU521852	Piura/FLU5528/2007	Human	H1	N1	Peru	SouthAmerica	2007
H1g1.6.2	EU521805	Tumbes/AST451/2007	Human	H1	N1	Peru	SouthAmerica	2007
H1g1.6.2	EU521862	Tumbes/FST969/2007	Human	H1	N0	Peru	SouthAmerica	2007
H1g1.6.2	EU521864	Tumbes/FST100/2007	Human	H1	N1	Peru	SouthAmerica	2007
H1g1.6.2	EU521817	Puno/FLU4316/2006	Human	H1	N1	Peru	SouthAmerica	2006
H1g1.6.2	EU521830	Chanchamayo/FLU4696/2006	Human	H1	N0	Peru	SouthAmerica	2006
H1g1.6.2	EU521845	Tumbes/FLU5356/2007	Human	H1	N0	Peru	SouthAmerica	2007
H1g1.6.2	EU521804	Tumbes/AST444/2007	Human	H1	N1	Peru	SouthAmerica	2007
H1g1.6.2	EU521863	Tumbes/FST987/2007	Human	H1	N0	Peru	SouthAmerica	2007
H1g1.6.2	EU521839	Chanchamayo/FLU5018/2006	Human	H1	N0	Peru	SouthAmerica	2006
H1g1.6.2	EU521840	Chanchamayo/FLU5082/2007	Human	H1	N1	Peru	SouthAmerica	2007
H1g1.6.2	EU555268	Piura/FLU5739/2007	Human	H1	N0	Peru	SouthAmerica	2007
H1g1.6.2	EU521851	Piura/FLU5521/2007	Human	H1	N0	Peru	SouthAmerica	2007
H1g1.6.2	EU521835	Tumbes/FLU4943/2006	Human	H1	N1	Peru	SouthAmerica	2006
H1g1.6.2	EU521836	Tumbes/FLU4946/2006	Human	H1	N0	Peru	SouthAmerica	2006
H1g1.6.2	EU521850	Piura/FLU5516/2007	Human	H1	N1	Peru	SouthAmerica	2007
H1g1.6.2	EU521838	Piura/FLU4987/2006	Human	H1	N0	Peru	SouthAmerica	2006
H1g1.6.2	EU521843	Sullana/FLU5305/2007	Human	H1	N1	Peru	SouthAmerica	2007
H1g1.6.2	EU555269	Piura/FLU5741/2007	Human	H1	N0	Peru	SouthAmerica	2007
H1g1.6.2	EU521854	Piura/FLU6366/2007	Human	H1	N0	Peru	SouthAmerica	2007
H1g1.6.2	EU521858	Maldonado/FMD1033/2007	Human	H1	N0	Peru	SouthAmerica	2007
H1g1.6.2	EU605960	Pucallpa/FLU4818/2006	Human	H1	N0	Peru	SouthAmerica	2006
H1g1.6.2	EU605961	Pucallpa/FLU4824/2006	Human	H1	N0	Peru	SouthAmerica	2006
H1g1.6.2	EU521865	Tumbes/FST1024/2007	Human	H1	N0	Peru	SouthAmerica	2007
H1g1.6.3	CY031338	Philippines/673/2006	Human	H1	N1	Philippines	Asia	2006
H1g1.6.3	EF566347	Philippines/624/2006	Human	H1	N1	Philippines	Asia	2006
H1g1.6.3	EF566374	Singapore/14/2004	Human	H1	N1	Singapore	Asia	2004
H1g1.6.3	EF566180	Singapore/14/2004	Human	H1	N1	Singapore	Asia	2004
H1g1.6.3	AB501412	Thailand/401/2006	Human	H1	N1	Thailand	Asia	2006
H1g1.6.3	EF566327	Malaysia/56/2006	Human	H1	N1	Malaysia	Asia	2006
H1g1.6.3	EU021262	Thailand/CU75/2006	Human	H1	N1	Thailand	Asia	2006
H1g1.6.3	AB501410	Thailand/399/2006	Human	H1	N1	Thailand	Asia	2006
H1g1.6.3	AB501411	Thailand/400/2006	Human	H1	N1	Thailand	Asia	2006
H1g1.6.3	EU021258	Thailand/CU44/2006	Human	H1	N1	Thailand	Asia	2006
H1g1.6.3	EU021260	Thailand/CU68/2006	Human	H1	N1	Thailand	Asia	2006
H1g1.6.3	EF566326	Malaysia/38/2006	Human	H1	N1	Malaysia	Asia	2006
H1g1.6.3	EU124047	Malaysia/760/2005	Human	H1	N0	Malaysia	Asia	2005
H1g1.6.3	EF566120	Bangkok/1940/2004	Human	H1	N0	Thailand	Asia	2004
H1g1.6.3	EF566375	Singapore/23/2004	Human	H1	N1	Singapore	Asia	2004
H1g1.6.3	EF566122	Taiwan/1559/2004	Human	H1	N1	Taiwan	Asia	2004
H1g1.6.3	EF566119	Ayatthaya/2111/2004	Human	H1	N0	Thailand	Asia	2004
H1g1.6.3	EF566124	Philippines/987/2004	Human	H1	N1	Philippines	Asia	2004
H1g1.6.3	EF566125	Philippines/936/2004	Human	H1	N1	Philippines	Asia	2004
H1g1.6.3	FJ225990	Ningbo/845/2006	Human	H1	N1	China	Asia	2006
H1g1.6.3	AB501390	Thailand/331/2006	Human	H1	N1	Thailand	Asia	2006
H1g1.6.3	FJ225986	Ningbo/1465/2005	Human	H1	N1	China	Asia	2005
H1g1.6.3	EU382987	Guangzhou/1684/2006	Human	H1	N1	China	Asia	2006
H1g1.6.3	EF566336	Macau/12598/2006	Human	H1	N0	Macau	Asia	2006
H1g1.6.3	FJ794117	Incheon/829/2005	Human	H1	N1	SouthKorea	Asia	2005
H1g1.6.3	EF566338	Macau/14585/2006	Human	H1	N1	Macau	Asia	2006
H1g1.6.3	EF566323	Taiwan/135/2006	Human	H1	N0	Taiwan	Asia	2006
H1g1.6.3	EF566330	Macau/10258/2006	Human	H1	N1	Macau	Asia	2006
H1g1.6.3	AB501392	Thailand/334/2006	Human	H1	N1	Thailand	Asia	2006
H1g1.6.3	AB501391	Thailand/332/2006	Human	H1	N1	Thailand	Asia	2006
H1g1.6.3	AB501407	Thailand/396/2006	Human	H1	N1	Thailand	Asia	2006
H1g1.6.3	AB501417	Thailand/424/2006	Human	H1	N1	Thailand	Asia	2006
H1g1.6.3	EU382986	Guangzhou/1561/2006	Human	H1	N1	China	Asia	2006
H1g1.6.3	EF566331	Macau/7334/2006	Human	H1	N0	Macau	Asia	2006
H1g1.6.3	AB501400	Thailand/387/2006	Human	H1	N1	Thailand	Asia	2006
H1g1.6.3	CY035126	St.Petersburg/8/2006	Human	H1	N1	Russia	Europe	2006
H1g1.6.3	EU100725	St.Petersburg/08/2006X-163	Human	H1	N1	Russia	Europe	2006
H1g1.6.3	EU100726	St.Petersburg/08/2006X-163A	Human	H1	N1	Russia	Europe	2006
H1g1.6.3	EU100727	St.Petersburg/08/2006X-163B	Human	H1	N1	Russia	Europe	2006
H1g1.6.3	CY036694	Norway/805/2006	Human	H1	N1	Norway	Europe	2006
H1g1.6.3	FJ231779	Berlin/6/2006	Human	H1	N1	Germany	Europe	2006
H1g1.6.3	FJ231781	Berlin/13/2006	Human	H1	N1	Germany	Europe	2006
H1g1.6.3	EU097956	Denmark/47/2006	Human	H1	N1	Denmark	Europe	2006
H1g1.6.3	CY016367	NewHampshire/1/2005	Human	H1	N1	USA	NorthAmerica	2005
H1g1.6.3	CY016363	Colorado/20/2005	Human	H1	N1	USA	NorthAmerica	2005
H1g1.6.3	CY016394	Colorado/1/2006	Human	H1	N1	USA	NorthAmerica	2006
H1g1.6.3	CY016372	Virginia/1/2006	Human	H1	N1	USA	NorthAmerica	2006
H1g1.6.3	CY016373	Virginia/1e/2006	Human	H1	N1	USA	NorthAmerica	2006
H1g1.6.3	CY016365	California/27/2005	Human	H1	N1	USA	NorthAmerica	2005
H1g1.6.3	EF566339	Brisbane/2/2006	Human	H1	N0	Australia	Oceania	2006
H1g1.6.3	CY031334	Victoria/500/2006	Human	H1	N1	Australia	Oceania	2006
H1g1.6.3	EF566329	Victoria/500/2006	Human	H1	N1	Australia	Oceania	2006
H1g1.6.3	CY031330	NewCaledonia/9/2004	Human	H1	N1	NewCaledonia	Oceania	2004
H1g1.6.3	EF566371	NewCaledonia/9/2004	Human	H1	N1	NewCaledonia	Oceania	2004
H1g1.6.3	EF566127	NewCaledonia/3/2004	Human	H1	N0	NewCaledonia	Oceania	2004
H1g1.6.3	EF566128	NewCaledonia/4/2004	Human	H1	N0	NewCaledonia	Oceania	2004
H1g1.6.3	EF566179	NewCaledonia/9/2004	Human	H1	N1	NewCaledonia	Oceania	2004
H1g1.6.3	CY031358	Waikato/01/2007	Human	H1	N1	NewZealand	Oceania	2007
H1g1.6.3	CY030217	Brisbane/270/2006	Human	H1	N1	Australia	Oceania	2006
H1g1.6.3	EF566121	Christchurch/106/2004	Human	H1	N1	NewZealand	Oceania	2004
H1g1.6.3	CY007467	Canterbury/106/2004	Human	H1	N1	NewZealand	Oceania	2004
H1g1.6.4	EF566352	Thailand/376/2006	Human	H1	N0	Thailand	Asia	2006
H1g1.6.4	AB501413	Thailand/402/2006	Human	H1	N1	Thailand	Asia	2006
H1g1.6.4	AB501398	Thailand/385/2006	Human	H1	N1	Thailand	Asia	2006
H1g1.6.4	AB501403	Thailand/391/2006	Human	H1	N1	Thailand	Asia	2006
H1g1.6.4	EF566357	Thailand/369/2006	Human	H1	N0	Thailand	Asia	2006
H1g1.6.4	AB501408	Thailand/397/2006	Human	H1	N1	Thailand	Asia	2006
H1g1.6.4	AB501414	Thailand/403/2006	Human	H1	N1	Thailand	Asia	2006
H1g1.6.4	AB501415	Thailand/404/2006	Human	H1	N1	Thailand	Asia	2006
H1g1.6.4	AB501404	Thailand/392/2006	Human	H1	N1	Thailand	Asia	2006
H1g1.6.4	EU021256	Thailand/CU57/2006	Human	H1	N1	Thailand	Asia	2006
H1g1.6.4	FJ445047	England/594/2006	Human	H1	N1	UnitedKingdom	Europe	2006
H1g1.6.4	FJ445073	England/593/2006	Human	H1	N1	UnitedKingdom	Europe	2006
H1g1.6.4	EU100683	Washington/7/2006	Human	H1	N1	USA	NorthAmerica	2006
H1g1.6.5	EU914914	Johannesburg/34/2008	Human	H1	N1	SouthAfrica	Africa	2008
H1g1.6.5	EU914916	Johannesburg/46/2008	Human	H1	N1	SouthAfrica	Africa	2008
H1g1.6.5	EU914915	Johannesburg/35/2008	Human	H1	N1	SouthAfrica	Africa	2008
H1g1.6.5	FJ743454	Johannesburg/37/2008	Human	H1	N1	SouthAfrica	Africa	2008
H1g1.6.5	EU914909	Johannesburg/10/2008	Human	H1	N1	SouthAfrica	Africa	2008
H1g1.6.5	EU914911	Johannesburg/25/2008	Human	H1	N1	SouthAfrica	Africa	2008
H1g1.6.5	FJ662916	Kisii/7541/2008	Human	H1	N1	Kenya	Africa	2008
H1g1.6.5	FJ662918	Kisii/7547/2008	Human	H1	N1	Kenya	Africa	2008
H1g1.6.5	FJ662920	Kisii/7559/2008	Human	H1	N1	Kenya	Africa	2008
H1g1.6.5	FJ662921	Kisii/7562/2008	Human	H1	N1	Kenya	Africa	2008
H1g1.6.5	FJ662923	Kisii/7570/2008	Human	H1	N1	Kenya	Africa	2008
H1g1.6.5	FJ662924	Kisii/7576/2008	Human	H1	N1	Kenya	Africa	2008
H1g1.6.5	FJ743452	Johannesburg/279/2008	Human	H1	N1	SouthAfrica	Africa	2008
H1g1.6.5	FJ662926	Mbagathi/7596/2008	Human	H1	N1	Kenya	Africa	2008
H1g1.6.5	EU914912	CapeTown/26/2008	Human	H1	N1	SouthAfrica	Africa	2008
H1g1.6.5	EU914910	Johannesburg/21/2008	Human	H1	N1	SouthAfrica	Africa	2008
H1g1.6.5	EU914913	Johannesburg/28/2008	Human	H1	N1	SouthAfrica	Africa	2008
H1g1.6.5	FJ743464	Johannesburg/28/2008	Human	H1	N1	SouthAfrica	Africa	2008
H1g1.6.5	FJ662912	Kericho/7525/2008	Human	H1	N1	Kenya	Africa	2008
H1g1.6.5	EU770367	Mbagathi/4833/2007	Human	H1	N1	Kenya	Africa	2007
H1g1.6.5	EU204969	Kenya/AF5623/2007	Human	H1	N1	Kenya	Africa	2007
H1g1.6.5	EU770358	Mbagathi/4819/2007	Human	H1	N1	Kenya	Africa	2007
H1g1.6.5	FJ662915	Kericho/7535/2008	Human	H1	N1	Kenya	Africa	2008
H1g1.6.5	CY031364	Johannesburg/67/2007	Human	H1	N1	SouthAfrica	Africa	2007
H1g1.6.5	FJ265654	Isiolo/5880/2008	Human	H1	N1	Kenya	Africa	2008
H1g1.6.5	FJ265656	Kericho/5883/2008	Human	H1	N1	Kenya	Africa	2008
H1g1.6.5	EU770351	Malindi/4835/2007	Human	H1	N1	Kenya	Africa	2007
H1g1.6.5	EU770356	Mbagathi/4840/2007	Human	H1	N1	Kenya	Africa	2007
H1g1.6.5	EU770366	Kericho/4831/2007	Human	H1	N1	Kenya	Africa	2007
H1g1.6.5	EU770355	Kisii/4839/2007	Human	H1	N1	Kenya	Africa	2007
H1g1.6.5	EU770357	Mbagathi/4844/2007	Human	H1	N1	Kenya	Africa	2007
H1g1.6.5	EU770364	Mbagathi/4827/2007	Human	H1	N1	Kenya	Africa	2007
H1g1.6.5	EU770363	Mbagathi/4826/2007	Human	H1	N1	Kenya	Africa	2007
H1g1.6.5	EU770362	Mbagathi/4825/2007	Human	H1	N1	Kenya	Africa	2007
H1g1.6.5	EU770350	Mbagathi/4834/2007	Human	H1	N1	Kenya	Africa	2007
H1g1.6.5	EU770368	Mbagathi/4841/2007	Human	H1	N1	Kenya	Africa	2007
H1g1.6.5	EU770353	Malindi/4837/2007	Human	H1	N1	Kenya	Africa	2007
H1g1.6.5	EU770360	Kisii/4823/2007	Human	H1	N1	Kenya	Africa	2007
H1g1.6.5	EU770352	Malindi/4836/2007	Human	H1	N1	Kenya	Africa	2007
H1g1.6.5	EU770359	Kericho/4822/2007	Human	H1	N1	Kenya	Africa	2007
H1g1.6.5	EU770365	Kisumu/4830/2007	Human	H1	N1	Kenya	Africa	2007
H1g1.6.5	EU770354	Malindi/4838/2007	Human	H1	N1	Kenya	Africa	2007
H1g1.6.5	FJ265658	Kisii/5890/2008	Human	H1	N1	Kenya	Africa	2008
H1g1.6.5	EU770361	Kisii/4824/2007	Human	H1	N1	Kenya	Africa	2007
H1g1.6.5	FJ662913	Kericho/7529/2008	Human	H1	N1	Kenya	Africa	2008
H1g1.6.5	FJ662914	Kericho/7530/2008	Human	H1	N1	Kenya	Africa	2008
H1g1.6.5	FJ662925	Kisii/7577/2008	Human	H1	N1	Kenya	Africa	2008
[truncated: 2,245 more rows]

## Sheet: H2
H2g1.1	CY005808	gull/MD/19/1977	Avian	H2	N9	USA	NorthAmerica	1977
H2g1.1	EU742644	gull/MD/19/1977	Avian	H2	N9	USA	NorthAmerica	1977
H2g1.1	L11130	gull/MD/19/77	Avian	H2	N8	USA	NorthAmerica	1977
H2g1.2	CY033340	northernshoveler/California/HKWF1128/2007	Avian	H2	N7	USA	NorthAmerica	2007
H2g1.2	CY042914	mallard/Minnesota/Sg-00692/2008	Avian	H2	N3	USA	NorthAmerica	2008
H2g1.2	CY039700	env/California/7303/2008	Environment	H2	N3	USA	NorthAmerica	2008
H2g1.2	CY039684	env/California/7279/2008	Environment	H2	N3	USA	NorthAmerica	2008
H2g1.2	CY039692	env/California/7286/2008	Environment	H2	N3	USA	NorthAmerica	2008
H2g1.2	CY039707	env/California/7313/2008	Environment	H2	N3	USA	NorthAmerica	2008
H2g1.2	CY039715	env/California/7335/2008	Environment	H2	N3	USA	NorthAmerica	2008
H2g1.2	CY045279	mallard/Quebec/10969/2006	Avian	H2	N3	Canada	NorthAmerica	2006
H2g1.2	CY045287	mallard/Quebec/11063/2006	Avian	H2	N3	Canada	NorthAmerica	2006
H2g1.2	CY047664	mallard/Quebec/11281/2006	Avian	H2	N3	Canada	NorthAmerica	2006
H2g1.2	CY003984	mallard/Alberta/149/2002	Avian	H2	N4	Canada	NorthAmerica	2002
H2g1.2	GQ257511	mallard/Maryland/333/2003	Avian	H2	N3	USA	NorthAmerica	2003
H2g1.2	FJ686794	mallard/Maryland/296/2003	Avian	H2	N3	USA	NorthAmerica	2003
H2g1.2	GQ257519	mallard/Maryland/338/2003	Avian	H2	N3	USA	NorthAmerica	2003
H2g1.2	FJ686706	mallard/Maryland/319/2003	Avian	H2	N3	USA	NorthAmerica	2003
H2g1.2	FJ686698	mallard/Maryland/301/2003	Avian	H2	N3	USA	NorthAmerica	2003
H2g1.2	FJ686810	mallard/Maryland/316/2003	Avian	H2	N3	USA	NorthAmerica	2003
H2g1.2	FJ686802	mallard/Maryland/314/2003	Avian	H2	N3	USA	NorthAmerica	2003
H2g1.2	GQ257503	mallard/Maryland/320/2003	Avian	H2	N3	USA	NorthAmerica	2003
H2g1.2	EU258939	swine/Missouri/2124514/2006	Swine	H2	N3	USA	NorthAmerica	2006
H2g1.2	EU258943	swine/Missouri/4296424/2006	Swine	H2	N3	USA	NorthAmerica	2006
H2g1.2	EU557522	northernpintail/Alaska/44183-123/2006	Avian	H2	N3	USA	NorthAmerica	2006
H2g1.2	FJ686730	mallard/Ohio/365/2003	Avian	H2	N1	USA	NorthAmerica	2003
H2g1.2	FJ686714	mallard/Ohio/362/2003	Avian	H2	N1	USA	NorthAmerica	2003
H2g1.2	FJ686722	mallard/Ohio/363/2003	Avian	H2	N1	USA	NorthAmerica	2003
H2g1.2	CY003992	mallard/Alberta/79/2003	Avian	H2	N3	Canada	NorthAmerica	2003
H2g1.2	CY036569	avian/NewYork/Sg-00424/2004	Avian	H2	N2	USA	NorthAmerica	2004
H2g1.2	CY036561	environment/NewJersey/Sg-00422/2004	Environment	H2	N2	USA	NorthAmerica	2004
H2g1.2	CY036573	avian/NewYork/Sg-00425/2004	Avian	H2	N2	USA	NorthAmerica	2004
H2g1.3	FJ357077	mallard/MN/14/1998	Avian	H2	N3	USA	NorthAmerica	1998
H2g1.3	FJ357085	mallard/MN/51/1998	Avian	H2	N3	USA	NorthAmerica	1998
H2g1.3	FJ517267	mallard/MN/506/2000	Avian	H2	N3	USA	NorthAmerica	2000
H2g1.3	AY633388	teal/Alberta/16/97	Avian	H2	N9	Canada	NorthAmerica	1997
H2g1.3	CY003960	blue-wingedteal/ALB/16/1997	Avian	H2	N9	Canada	NorthAmerica	1997
H2g1.3	FJ686786	mallard/Maryland/234/2001	Avian	H2	N3	USA	NorthAmerica	2001
H2g1.3	FJ686778	mallard/Maryland/233/2001	Avian	H2	N3	USA	NorthAmerica	2001
H2g1.3	GQ257495	mallard/Maryland/235/2001	Avian	H2	N3	USA	NorthAmerica	2001
H2g1.3	FJ686770	mallard/Maryland/232/2001	Avian	H2	N3	USA	NorthAmerica	2001
H2g1.3	FJ686762	mallard/Maryland/231/2001	Avian	H2	N3	USA	NorthAmerica	2001
H2g1.3	FJ686754	mallard/Maryland/228/2001	Avian	H2	N3	USA	NorthAmerica	2001
H2g1.3	FJ686746	mallard/Maryland/226/2001	Avian	H2	N3	USA	NorthAmerica	2001
H2g1.3	AY633196	mallard/Alberta/205/98	Avian	H2	N3	Canada	NorthAmerica	1998
H2g1.3	CY003968	mallard/ALB/205/1998	Avian	H2	N3	Canada	NorthAmerica	1998
H2g1.3	AY633228	mallard/Alberta/226/98	Avian	H2	N3	Canada	NorthAmerica	1998
H2g1.3	CY003976	mallard/ALB/226/1998	Avian	H2	N3	Canada	NorthAmerica	1998
H2g1.3	CY042277	duck/Pennsylvania/Sg-00269/1995	Avian	H2	N3	USA	NorthAmerica	1995
H2g1.3	AY633364	pintail/Alberta/22/97	Avian	H2	N9	Canada	NorthAmerica	1997
H2g1.3	CY003944	mallard/ALB/201/1996	Avian	H2	N3	Canada	NorthAmerica	1996
H2g1.3	AY633180	mallard/Alberta/202/96	Avian	H2	N5	Canada	NorthAmerica	1996
H2g1.3	CY003952	mallard/ALB/202/1996	Avian	H2	N5	Canada	NorthAmerica	1996
H2g1.4.1	CY003847	mallard/Alberta/77/1977	Avian	H2	N3	Canada	NorthAmerica	1977
H2g1.4.1	AF116202	Mallard/NewYork/66861/78	Avian	H2	N3	USA	NorthAmerica	1978
H2g1.4.1	L11137	mallard/NY/6750/78	Avian	H2	N2	USA	NorthAmerica	1978
H2g1.4.1	AF116205	BlackDuck/NJ/1580/78	Avian	H2	N3	USA	NorthAmerica	1978
H2g1.4.1	AF231356	blackduck/NewJersey/1580/78	Avian	H2	N3	USA	NorthAmerica	1978
H2g1.4.1	L11138	mallard/Ontario/56/76	Avian	H2	N3	Canada	NorthAmerica	1976
H2g1.4.1	AF116203	Pintailduck/Alberta/293/77	Avian	H2	N3	Canada	NorthAmerica	1977
H2g1.4.1	CY003855	pintail/Alberta/293/1977	Avian	H2	N9	Canada	NorthAmerica	1977
H2g1.4.1	AF116204	Pintailduck/Alberta/211/80	Avian	H2	N3	Canada	NorthAmerica	1980
H2g1.4.1	AF116199	Silkychicken/PA/9600897/96	Avian	H2	N3	USA	NorthAmerica	1996
H2g1.4.1	CY042289	guineafowl/NewJersey/Sg-00296/1996	Avian	H2	N3	USA	NorthAmerica	1996
H2g1.4.1	CY003879	mallardduck/ALB/376/1985	Avian	H2	N3	Canada	NorthAmerica	1985
H2g1.4.1	CY014558	mallardduck/Alberta/323/1988	Avian	H2	N1	Canada	NorthAmerica	1988
H2g1.4.1	L11135	mallard/ALberta/353/88	Avian	H2	N3	Canada	NorthAmerica	1988
H2g1.4.1	CY003936	mallardduck/ALB/353/1988	Avian	H2	N3	Canada	NorthAmerica	1988
H2g1.4.1	CY003871	mallardduck/ALB/884/1984	Avian	H2	N5	Canada	NorthAmerica	1984
H2g1.4.1	CY017693	mallard/Ohio/30/1986	Avian	H2	N1	USA	NorthAmerica	1986
H2g1.4.1	CY018877	green-wingedteal/Ohio/175/1986	Avian	H2	N1	USA	NorthAmerica	1986
H2g1.4.1	CY021125	mallard/Ohio/37/1986	Avian	H2	N1	USA	NorthAmerica	1986
H2g1.4.1	CY005413	semi-palmatedsandpiper/Brazil/43/1990	Avian	H2	N1	Brazil	SouthAmerica	1990
H2g1.4.2	AF116201	Laughinggull/NewJersey/75/85	Avian	H2	N9	USA	NorthAmerica	1985
H2g1.4.2	CY003863	laughinggull/NJ/75/1985	Avian	H2	N9	USA	NorthAmerica	1985
H2g1.4.2	CY003887	sanderling/NJ/766/1986	Avian	H2	N7	USA	NorthAmerica	1986
H2g1.4.2	CY003922	laughinggull/NJ/798/1986	Avian	H2	N7	USA	NorthAmerica	1986
H2g1.4.2	CY014601	herringgull/Delaware/471/1986	Avian	H2	N7	USA	NorthAmerica	1986
H2g1.5	CY042257	chicken/NewYork/Sg-00256/1994	Avian	H2	N2	USA	NorthAmerica	1994
H2g1.5	CY042292	guineafowl/NewYork/Sg-00302/1997	Avian	H2	N2	USA	NorthAmerica	1997
H2g1.5	CY042290	chicken/NewYork/Sg-00300/1997	Avian	H2	N2	USA	NorthAmerica	1997
H2g1.5	CY042294	chicken/NewYork/Sg-00303/1997	Avian	H2	N2	USA	NorthAmerica	1997
H2g1.5	CY042291	chicken/NewYork/Sg-00301/1997	Avian	H2	N2	USA	NorthAmerica	1997
H2g1.5	CY042265	chicken/NewYork/Sg-00260/1995	Avian	H2	N2	USA	NorthAmerica	1995
H2g1.5	CY042288	chicken/NewYork/Sg-00289/1996	Avian	H2	N2	USA	NorthAmerica	1996
H2g1.5	CY042270	chicken/NewJersey/Sg-00264/1995	Avian	H2	N2	USA	NorthAmerica	1995
H2g1.5	AF116197	Chicken/NY/13828-3/95	Avian	H2	N2	USA	NorthAmerica	1995
H2g1.5	CY014821	chicken/NewYork/13828-3/1995	Avian	H2	N2	USA	NorthAmerica	1995
H2g1.5	CY042281	chicken/NewYork/Sg-00273/1995	Avian	H2	N2	USA	NorthAmerica	1995
H2g1.5	AF116200	Guineafowl/NY/20221-11/95	Avian	H2	N2	USA	NorthAmerica	1995
H2g1.5	CY042266	guineafowl/NewYork/Sg-00262/1995	Avian	H2	N2	USA	NorthAmerica	1995
H2g1.5	CY042273	duck/NewJersey/Sg-00266/1995	Avian	H2	N2	USA	NorthAmerica	1995
H2g1.5	CY014829	guineafowl/NewYork/20221-11/1995	Avian	H2	N2	USA	NorthAmerica	1995
H2g1.5	CY042271	guineafowl/NewJersey/Sg-00265/1995	Avian	H2	N2	USA	NorthAmerica	1995
H2g1.5	CY042279	guineafowl/NewYork/Sg-00272/1995	Avian	H2	N2	USA	NorthAmerica	1995
H2g1.5	CY042286	guineafowl/NewYork/Sg-00278/1995	Avian	H2	N2	USA	NorthAmerica	1995
H2g1.5	CY042276	chicken/NewJersey/Sg-00268/1995	Avian	H2	N2	USA	NorthAmerica	1995
H2g1.5	CY042285	chicken/NewJersey/Sg-00276/1995	Avian	H2	N2	USA	NorthAmerica	1995
H2g1.5	AF116198	Chicken/NY/29878/91	Avian	H2	N2	USA	NorthAmerica	1991
H2g1.5	L11131	guinea/NJ/3070/91	Avian	H2	N2	USA	NorthAmerica	1991
H2g2.1	L11129	duck/GDR/72	Avian	H2	N9	Germany	Europe	1972
H2g2.1	CY014710	duck/Germany/1215/1973	Avian	H2	N3	Germany	Europe	1973
H2g2.1	GQ247843	duck/Germany/1215/1973	Avian	H2	N3	Germany	Europe	1973
H2g2.2	CY005538	duck/HongKong/319/1978	Avian	H2	N2	HongKong	Asia	1978
H2g2.2	L11128	duck/HongKong/273/78	Avian	H2	N2	HongKong	Asia	1978
H2g2.2	CY005546	duck/HongKong/278/1978	Avian	H2	N9	HongKong	Asia	1978
H2g2.2	AB292785	duck/HongKong/278/1978	Avian	H2	N9	HongKong	Asia	1978
H2g2.2	L11141	Pintail/Praimoric/625/76	Avian	H2	N2	Russia	Europe	1976
H2g2.3	L11140	Pekingduck/Potsdam/1689-4/85	Avian	H2	N3	Germany	Europe	1985
H2g2.3	L11139	mallard/Potsdam/178-4/83	Avian	H2	N2	Germany	Europe	1983
H2g2.3	L11127	chicken/Potsdam/4705/84	Avian	H2	N2	Germany	Europe	1984
H2g2.3	DQ017486	mallard/Postdam/178-4/83	Avian	H2	N2	Germany	Europe	1983
H2g2.3	DQ017493	mallard/Postdam/178-4/83	Avian	H2	N2	Germany	Europe	1983
H2g2.3	CY005765	mallard/Potsdam/177-4/1983	Avian	H2	N2	Germany	Europe	1983
H2g2.3	L11136	mallard/MT/Y61	Avian	H2	N2	USA	NorthAmerica	1961
H2g2.4.1	CY014556	herringgull/Delaware/670/1988	Avian	H2	N9	USA	NorthAmerica	1988
H2g2.4.1	L11132	herringgull/DE/677/88	Avian	H2	N8	USA	NorthAmerica	1988
H2g2.4.1	CY004554	herringgull/DE/692/1988	Avian	H2	N8	USA	NorthAmerica	1988
H2g2.4.1	CY003914	herringgull/DE/703/1988	Avian	H2	N8	USA	NorthAmerica	1988
H2g2.4.1	CY003907	herringgull/DE/698/1988	Avian	H2	N1	USA	NorthAmerica	1988
H2g2.4.2	AF116207	Ruddyturnstone/DE/34/93	Avian	H2	N1	USA	NorthAmerica	1993
H2g2.4.2	CY015135	ruddyturnstone/Delaware/34/1993	Avian	H2	N1	USA	NorthAmerica	1993
H2g2.4.2	AF116208	Ruddyturnstone/DE/81/93	Avian	H2	N1	USA	NorthAmerica	1993
H2g2.4.3	AF116210	Shorebird/DE/111/97	Avian	H2	N1	USA	NorthAmerica	1997
H2g2.4.3	AF116211	Shorebird/DE/138/97	Avian	H2	N1	USA	NorthAmerica	1997
H2g2.4.3	AF116209	Shorebird/DE/24/98	Avian	H2	N1	USA	NorthAmerica	1998
H2g2.4.3	AF116206	Ruddyturnstone/DE/142/98	Avian	H2	N8	USA	NorthAmerica	1998
H2g2.5	CY014608	duck/Nanchang/2-0486/2000	Avian	H2	N9	China	Asia	2000
H2g2.5	CY014609	duck/Nanchang/4-184/2000	Avian	H2	N9	China	Asia	2000
H2g2.5	AY422014	duck/Hokkaido/107/01	Avian	H2	N3	Japan	Asia	2001
H2g2.5	AB276115	duck/Hokkaido/95/01	Avian	H2	N2	Japan	Asia	2001
H2g2.5	AY422016	duck/Hokkaido/86/01	Avian	H2	N3	Japan	Asia	2001
H2g2.5	AY422017	duck/Hokkaido/95/01	Avian	H2	N2	Japan	Asia	2001
H2g2.5	AY422015	duck/Hokkaido/17/01	Avian	H2	N3	Japan	Asia	2001
H2g2.5	AB298281	duck/Hokkaido/17/2001	Avian	H2	N3	Japan	Asia	2001
H2g2.5	CY041226	mallard/Netherlands/31/2006	Avian	H2	N2	Netherlands	Europe	2006
H2g2.5	GQ415319	mallard/Switzerland/WV4060057/2006	Avian	H2	N8	Switzerland	Europe	2006
H2g2.5	AY684893	mallard/Netherlands/13/99	Avian	H2	N2	Netherlands	Europe	1999
H2g2.5	CY041234	mallard/Netherlands/14/2007	Avian	H2	N2	Netherlands	Europe	2007
H2g2.5	FM179753	wigeon/Norway/10_1783/2006	Avian	H2	N6	Norway	Europe	2006
H2g2.5	CY041330	mallard/Sweden/45/2005	Avian	H2	N3	Sweden	Europe	2005
H2g2.5	EU735810	chicken/PA/298101-4/2004	Avian	H2	N2	USA	NorthAmerica	2004
H2g2.5	CY036576	chicken/Pennsylvania/Sg-00426/2004	Avian	H2	N2	USA	NorthAmerica	2004
H2g2.5	CY036580	chicken/Pennsylvania/Sg-00427/2004	Avian	H2	N2	USA	NorthAmerica	2004
H2g2.6.1	AB056699	Kayano/57	Human	H2	N2	Japan	Asia	1957
H2g2.6.1	CY032269	Guiyang/1/1957	Human	H2	N2	China	Asia	1957
H2g2.6.1	AF270724	Malaya/16/58	Human	H2	N2	Malaysia	Asia	1958
H2g2.6.1	AB432937	Adachi/2/1957	Human	H2	N2	Japan	Asia	1957
H2g2.6.1	AY209954	Philippines/2/60	Human	H2	N2	Philippines	Asia	1960
H2g2.6.1	J02127	Japan/305/1957	Human	H2	N2	Japan	Asia	1957
H2g2.6.1	AY209953	Japan/305/57	Human	H2	N2	Japan	Asia	1957
H2g2.6.1	DQ508841	Japan/305/57	Human	H2	N2	Japan	Asia	1957
H2g2.6.1	L20406	Japan/305+/1957	Human	H2	N2	Japan	Asia	1957
H2g2.6.1	L11142	Singapore/1/57	Human	H2	N2	Singapore	Asia	1957
H2g2.6.1	L20410	Singapore/1/1957	Human	H2	N2	Singapore	Asia	1957
H2g2.6.1	CY045804	Japan/305/1957	Human	H2	N2	Japan	Asia	1957
H2g2.6.1	CY014976	Japan/305/1957	Human	H2	N2	Japan	Asia	1957
H2g2.6.1	CY044325	Japan/305/1957	Human	H2	N2	Japan	Asia	1957
H2g2.6.1	L20407	Japan/305-/1957	Human	H2	N2	Japan	Asia	1957
H2g2.6.1	AB296074	Singapore/1/1957	Human	H2	N2	Singapore	Asia	1957
H2g2.6.1	CY034044	Singapore/1/1957	Human	H2	N2	Singapore	Asia	1957
H2g2.6.1	CY034068	Singapore/1-MA12B/1957	Human	H2	N2	Singapore	Asia	1957
H2g2.6.1	CY034052	Singapore/1-MA12/1957	Human	H2	N2	Singapore	Asia	1957
H2g2.6.1	CY034060	Singapore/1-MA12	Human	H2	N2	Singapore	Asia	1957
H2g2.6.1	CY034076	Singapore/1-MA12D/1957	Human	H2	N2	Singapore	Asia	1957
H2g2.6.1	CY031603	Moscow/1019/1965	Human	H2	N2	Russia	Europe	1965
H2g2.6.1	L11134	Krasnodar/101/59	Human	H2	N2	Russia	Europe	1959
H2g2.6.1	CY032253	Krasnodar/101/1959	Human	H2	N2	Russia	Europe	1959
H2g2.6.1	AF270717	Leningrad/134/57	Human	H2	N2	Russia	Europe	1957
H2g2.6.1	AY209960	Netherlands/60/62	Human	H2	N2	Netherlands	Europe	1962
H2g2.6.1	AY209955	England/1/61	Human	H2	N2	UnitedKingdom	Europe	1961
H2g2.6.1	AY209956	Panama/1/61	Human	H2	N2	Panama	NorthAmerica	1961
H2g2.6.1	AY209958	Yale/1/61	Human	H2	N2	USA	NorthAmerica	1961
H2g2.6.1	AF270721	AnnArbor/6/60	Human	H2	N2	USA	NorthAmerica	1960
H2g2.6.1	AF270720	Albany/7/57	Human	H2	N2	USA	NorthAmerica	1957
H2g2.6.1	CY031579	AnnArbor/23/1957	Human	H2	N2	USA	NorthAmerica	1957
H2g2.6.1	AF270719	Davis/1/57	Human	H2	N2	USA	NorthAmerica	1957
H2g2.6.1	L20409	RI/5-/1957	Human	H2	N2	USA	NorthAmerica	1957
H2g2.6.1	CY020373	Albany/4/1958	Human	H2	N2	USA	NorthAmerica	1958
H2g2.6.1	CY021013	Albany/5/1958	Human	H2	N2	USA	NorthAmerica	1958
H2g2.6.1	L20408	RI/5+/1957	Human	H2	N2	USA	NorthAmerica	1957
H2g2.6.1	CY021789	Albany/24/1958	Human	H2	N2	USA	NorthAmerica	1958
H2g2.6.1	CY021069	Albany/3/1958	Human	H2	N2	USA	NorthAmerica	1958
H2g2.6.1	CY021805	Albany/22/1957	Human	H2	N2	USA	NorthAmerica	1957
H2g2.6.1	CY020317	Albany/2/1958	Human	H2	N2	USA	NorthAmerica	1958
H2g2.6.1	CY021813	Albany/1/1958	Human	H2	N2	USA	NorthAmerica	1958
H2g2.6.1	CY020381	Albany/26/1957	Human	H2	N2	USA	NorthAmerica	1957
H2g2.6.1	CY022013	Albany/20/1957	Human	H2	N2	USA	NorthAmerica	1957
H2g2.6.1	AF270723	Albany/6/58	Human	H2	N2	USA	NorthAmerica	1958
H2g2.6.1	AF270722	RI/5+/57	Human	H2	N2	USA	NorthAmerica	1957
H2g2.6.1	AF270718	RI/5-/57	Human	H2	N2	USA	NorthAmerica	1957
H2g2.6.1	DQ009917	Canada/720/05	Human	H2	N2	Canada	NorthAmerica	2005
H2g2.6.1	AF270716	ElSalvador/2/57	Human	H2	N2	ElSalvador	NorthAmerica	1957
H2g2.6.1	CY020541	Albany/1/1959	Human	H2	N2	USA	NorthAmerica	1959
H2g2.6.1	AF270727	Ohio/2/59	Human	H2	N2	USA	NorthAmerica	1959
H2g2.6.1	CY021933	Albany/1/1960	Human	H2	N2	USA	NorthAmerica	1960
H2g2.6.1	AF270726	Victoria/15681/59	Human	H2	N2	Australia	Oceania	1959
H2g2.6.1	AY209957	SaoPaolo/1/61	Human	H2	N2	Brazil	SouthAmerica	1961
H2g2.6.1	AF270728	Chile/6/57	Human	H2	N2	Chile	SouthAmerica	1957
H2g2.6.1	AY209952	Chile/13/57	Human	H2	N2	Chile	SouthAmerica	1957
H2g2.6.1	AF270725	SaoPaolo/3/59	Human	H2	N2	Brazil	SouthAmerica	1959
H2g2.6.2	CY032285	Johannesburg/617/1967	Human	H2	N2	SouthAfrica	Africa	1967
H2g2.6.2	AY209982	Johannesburg/567/67	Human	H2	N2	SouthAfrica	Africa	1967
H2g2.6.2	AY209987	Tokyo/3/67	Human	H2	N2	Japan	Asia	1967
H2g2.6.2	AY209961	Taiwan/1/62	Human	H2	N2	Taiwan	Asia	1962
H2g2.6.2	AY209962	Yokosuka/3/62	Human	H2	N2	Japan	Asia	1962
H2g2.6.2	CY032277	Tashkent/1046/1967	Human	H2	N2	Uzbekistan	Asia	1967
H2g2.6.2	AY209985	Taiwan/1/67	Human	H2	N2	Taiwan	Asia	1967
H2g2.6.2	AY209959	Japan/170/62	Human	H2	N2	Japan	Asia	1962
H2g2.6.2	L11133	Korea/426/68	Human	H2	N2	SouthKorea	Asia	1968
H2g2.6.2	AY209971	Kumamoto/1/65	Human	H2	N2	Japan	Asia	1965
H2g2.6.2	CY036815	Korea/426/1968	Human	H2	N2	SouthKorea	Asia	1968
H2g2.6.2	CY031595	Korea/426/1968	Human	H2	N2	SouthKorea	Asia	1968
H2g2.6.2	AY209989	Korea/426/68	Human	H2	N2	SouthKorea	Asia	1968
H2g2.6.2	DQ508881	Taiwan/1964	Human	H2	N2	Taiwan	Asia	1964
H2g2.6.2	D13580	Izumi/5/65	Human	H2	N2	Japan	Asia	1965
H2g2.6.2	AY209969	Taiwan/1/64	Human	H2	N2	Taiwan	Asia	1964
H2g2.6.2	D13579	Izumi/5/65	Human	H2	N2	Japan	Asia	1965
H2g2.6.2	AY209968	Murakami/4/64	Human	H2	N2	Japan	Asia	1964
H2g2.6.2	L11126	Berlin/3/64	Human	H2	N2	Germany	Europe	1964
H2g2.6.2	AY209980	England/10/67	Human	H2	N2	UnitedKingdom	Europe	1967
H2g2.6.2	CY034926	CzechRepublic/1/1966	Human	H2	N2	CzechRepublic	Europe	1966
H2g2.6.2	AY209984	Poland/5/67	Human	H2	N2	Poland	Europe	1967
H2g2.6.2	AY209966	Netherlands/65/63	Human	H2	N2	Netherlands	Europe	1963
H2g2.6.2	CY035078	Netherlands/56/1963	Human	H2	N2	Netherlands	Europe	1963
H2g2.6.2	AY209967	England/12/64	Human	H2	N2	UnitedKingdom	Europe	1964
H2g2.6.2	CY032245	Potsdam/2/1965	Human	H2	N2	Germany	Europe	1965
H2g2.6.2	CY032237	Berlin/3/1964	Human	H2	N2	Germany	Europe	1964
H2g2.6.2	CY032261	Cottbus/1/1964	Human	H2	N2	Germany	Europe	1964
H2g2.6.2	CY021997	Albany/4/1967	Human	H2	N2	USA	NorthAmerica	1967
H2g2.6.2	CY020405	Albany/3/1967	Human	H2	N2	USA	NorthAmerica	1967
H2g2.6.2	CY020389	Albany/6/1967	Human	H2	N2	USA	NorthAmerica	1967
H2g2.6.2	CY020397	Albany/7/1967	Human	H2	N2	USA	NorthAmerica	1967
H2g2.6.2	AY209978	AnnArbor/7/67	Human	H2	N2	USA	NorthAmerica	1967
H2g2.6.2	CY020517	Albany/9/1967	Human	H2	N2	USA	NorthAmerica	1967
H2g2.6.2	L11125	Berkeley/1/68	Human	H2	N2	USA	NorthAmerica	1968
H2g2.6.2	AY209988	Berkeley/1/68	Human	H2	N2	USA	NorthAmerica	1968
H2g2.6.2	CY033473	Berkeley/1/1968	Human	H2	N2	USA	NorthAmerica	1968
H2g2.6.2	CY020413	Albany/2/1968	Human	H2	N2	USA	NorthAmerica	1968
H2g2.6.2	AY209983	Panama/1/67	Human	H2	N2	Panama	NorthAmerica	1967
H2g2.6.2	CY020549	Albany/8/1967	Human	H2	N2	USA	NorthAmerica	1967
H2g2.6.2	CY021021	Albany/1/1968	Human	H2	N2	USA	NorthAmerica	1968
H2g2.6.2	AY209981	Georgia/1/67	Human	H2	N2	USA	NorthAmerica	1967
H2g2.6.2	CY033980	Georgia/1/1967	Human	H2	N2	USA	NorthAmerica	1967
H2g2.6.2	AY209975	California/1/66	Human	H2	N2	USA	NorthAmerica	1966
H2g2.6.2	AY209976	Canada/1/66	Human	H2	N2	Canada	NorthAmerica	1966
H2g2.6.2	AY209977	Panama/1/66	Human	H2	N2	Panama	NorthAmerica	1966
H2g2.6.2	AY209974	Berkeley/1/66	Human	H2	N2	USA	NorthAmerica	1966
H2g2.6.2	AY209973	Pittsburgh/2/65	Human	H2	N2	USA	NorthAmerica	1965
H2g2.6.2	CY031587	NorthCarolina/1/1968	Human	H2	N2	USA	NorthAmerica	1968
H2g2.6.2	CY045788	NorthCarolina/1/1963	Human	H2	N2	USA	NorthAmerica	1963
H2g2.6.2	AY209964	Georgia/1/63	Human	H2	N2	USA	NorthAmerica	1963
H2g2.6.2	AY209965	GreatLakes/3/63	Human	H2	N2	USA	NorthAmerica	1963
H2g2.6.2	AY209963	Albany/1/63	Human	H2	N2	USA	NorthAmerica	1963
H2g2.6.2	AY209970	Albany/1/65	Human	H2	N2	USA	NorthAmerica	1965
H2g2.6.2	AY209972	NewJersey/3/65	Human	H2	N2	USA	NorthAmerica	1965
H2g2.6.2	AY209986	Montevideo/2208/67	Human	H2	N2	Uruguay	SouthAmerica	1967
H2g2.6.2	AY209979	Cordoba/522/67	Human	H2	N2	Argentina	SouthAmerica	1967

## Sheet: H3
H3g1.1.1	CY032720	northernpintail/California/HKWF792/2007	Avian	H3	N8	USA	NorthAmerica	2007
H3g1.1.1	EU871828	duck/LA/17G/1987	Avian	H3	N8	USA	NorthAmerica	1987
H3g1.1.2.1	EU735834	duck/NY/13822/1995	Avian	H3	N8	USA	NorthAmerica	1995
H3g1.1.2.2	CY014571	blue-wingedteal/Alberta/120/1991	Avian	H3	N8	Canada	NorthAmerica	1991
H3g1.1.2.2	M73776	mallard/NewYork/6874/1978	Avian	H3	N2	USA	NorthAmerica	1978
H3g1.1.2.2	EU742652	duck/NY/6874/1978	Avian	H3	N2	USA	NorthAmerica	1978
H3g1.1.2.2	CY017411	mallard/Ohio/424/1988	Avian	H3	N2	USA	NorthAmerica	1988
H3g1.1.2.2	CY020933	northernshoveler/Ohio/35/1986	Avian	H3	N8	USA	NorthAmerica	1986
H3g1.1.2.2	L31949	seal/MA/3911/1992	Seal	H3	N3	USA	NorthAmerica	1992
H3g1.1.2.2	L32024	seal/MA/3984/1992	Seal	H3	N3	USA	NorthAmerica	1992
H3g1.1.2.2	CY014961	mallardduck/NewYork/174/1982	Avian	H3	N8	USA	NorthAmerica	1982
H3g1.1.2.2	CY016395	mallard/Ohio/264/1986	Avian	H3	N8	USA	NorthAmerica	1986
H3g1.1.2.2	CY020717	mallard/Ohio/48/1986	Avian	H3	N2	USA	NorthAmerica	1986
H3g1.1.2.2	CY014865	mallardduck/NewYork/157/1986	Avian	H3	N6	USA	NorthAmerica	1986
H3g1.1.2.2	EF554803	mallardduck/Minnesota/1979	Avian	H3	N1	USA	NorthAmerica	1979
H3g1.1.2.3	FJ520079	northernpintail/California/44242-711/2006	Avian	H3	N6	USA	NorthAmerica	2006
H3g1.1.2.3	CY039620	northernshoveler/California/HKWF569/2007	Avian	H3	N1	USA	NorthAmerica	2007
H3g1.1.2.3	CY033731	blue-wingedteal/Texas/Sg-00084/2007	Avian	H3	N8	USA	NorthAmerica	2007
H3g1.1.2.3	CY033718	blue-wingedteal/Texas/Sg-00078/2007	Avian	H3	N8	USA	NorthAmerica	2007
H3g1.1.2.3	CY035364	blue-wingedteal/Texas/Sg-00205/2007	Avian	H3	N8	USA	NorthAmerica	2007
H3g1.1.2.3	CY033727	blue-wingedteal/Texas/Sg-00083/2007	Avian	H3	N6	USA	NorthAmerica	2007
H3g1.1.2.3	CY033726	blue-wingedteal/Texas/Sg-00082/2007	Avian	H3	N8	USA	NorthAmerica	2007
H3g1.1.2.3	CY033735	blue-wingedteal/Texas/Sg-00085/2007	Avian	H3	N6	USA	NorthAmerica	2007
H3g1.1.2.3	CY042167	blue-wingedteal/Louisiana/Sg-00189/2007	Avian	H3	N8	USA	NorthAmerica	2007
H3g1.1.2.3	CY035395	blue-wingedteal/Louisiana/Sg-00218/2007	Avian	H3	N8	USA	NorthAmerica	2007
H3g1.1.2.3	CY034655	green-wingedteal/Louisiana/Sg-00092/2007	Avian	H3	N8	USA	NorthAmerica	2007
H3g1.1.2.3	CY042384	northernpintail/SouthDakota/Sg-00461/2008	Avian	H3	N8	USA	NorthAmerica	2008
H3g1.1.2.3	CY045319	northernpintail/Saskatchewan/22910/2007	Avian	H3	N2	Canada	NorthAmerica	2007
H3g1.1.2.3	CY042087	mallardduck/Minnesota/Sg-00117/2007	Avian	H3	N8	USA	NorthAmerica	2007
H3g1.1.2.3	CY042170	mallard/Minnesota/Sg-00191/2007	Avian	H3	N8	USA	NorthAmerica	2007
H3g1.1.2.3	CY017773	longtailduck/Maryland/291/2005	Avian	H3	N8	USA	NorthAmerica	2005
H3g1.1.2.3	CY047608	mallard/Quebec/11082/2006	Avian	H3	N8	Canada	NorthAmerica	2006
H3g1.1.2.3	EU743195	chicken/NY/11602-12/1998	Avian	H3	N2	USA	NorthAmerica	1998
H3g1.1.2.3	FJ877137	mallard/AB/431/2006	Avian	H3	N8	Canada	NorthAmerica	2006
H3g1.1.2.3	CY033348	northernshoveler/California/HKWF1131/2007	Avian	H3	N5	USA	NorthAmerica	2007
H3g1.1.2.3	CY033332	northernshoveler/California/HKWF1046/2007	Avian	H3	N5	USA	NorthAmerica	2007
H3g1.1.2.3	CY033364	northernshoveler/California/HKWF1199/2007	Avian	H3	N5	USA	NorthAmerica	2007
H3g1.1.2.3	CY032728	northernshoveler/California/HKWF979/2007	Avian	H3	N3	USA	NorthAmerica	2007
H3g1.1.2.3	CY034186	northernshoveler/California/HKWF848/2007	Avian	H3	N7	USA	NorthAmerica	2007
H3g1.1.2.3	CY033324	northernshoveler/California/HKWF1021/2007	Avian	H3	N7	USA	NorthAmerica	2007
H3g1.1.2.3	CY032672	northernshoveler/California/HKWF1201/2007	Avian	H3	N5	USA	NorthAmerica	2007
H3g1.1.2.3	CY033372	northernshoveler/California/HKWF1367/2007	Avian	H3	N7	USA	NorthAmerica	2007
H3g1.1.2.3	CY047520	blue-wingedteal/Alberta/11646/2005	Avian	H3	N8	Canada	NorthAmerica	2005
H3g1.1.2.3	CY047488	mallard/BritishColumbia/07706/2005	Avian	H3	N8	Canada	NorthAmerica	2005
H3g1.1.2.3	AY619969	swine/Ontario/K01477/01	Swine	H3	N3	Canada	NorthAmerica	2001
H3g1.1.2.3	AY619977	swine/Ontario/42729A/01	Swine	H3	N3	Canada	NorthAmerica	2001
H3g1.1.2.3	CY017999	blue-wingedteal/Ohio/31/1999	Avian	H3	N2	USA	NorthAmerica	1999
H3g1.1.2.3	CY047504	mallard/BritishColumbia/07569/2005	Avian	H3	N8	Canada	NorthAmerica	2005
H3g1.1.2.3	CY045367	mallard/Washington/20010-002/2006	Avian	H3	N8	USA	NorthAmerica	2006
H3g1.1.2.3	EU743536	mallard/MN/259/1999	Avian	H3	N6	USA	NorthAmerica	1999
H3g1.1.2.3	CY021261	mallard/Maryland/681/2005	Avian	H3	N2	USA	NorthAmerica	2005
H3g1.1.2.3	CY021269	mallard/Maryland/691/2005	Avian	H3	N2	USA	NorthAmerica	2005
H3g1.1.2.3	CY021453	mallard/Maryland/615/2005	Avian	H3	N2	USA	NorthAmerica	2005
H3g1.1.2.3	CY022741	mallard/Maryland/712/2005	Avian	H3	N2	USA	NorthAmerica	2005
H3g1.1.2.3	CY021277	mallard/Maryland/631/2005	Avian	H3	N2	USA	NorthAmerica	2005
H3g1.1.2.3	CY021461	mallard/Maryland/710/2005	Avian	H3	N2	USA	NorthAmerica	2005
H3g1.1.2.3	CY024810	mallard.Maryland/708/2005	Avian	H3	N2	USA	NorthAmerica	2005
H3g1.1.2.3	CY043023	blue-wingedteal/NorthDakota/Sg-00746/2008	Avian	H3	N8	USA	NorthAmerica	2008
H3g1.1.2.3	CY042831	northernshoveler/Minnesota/Sg-00671/2008	Avian	H3	N8	USA	NorthAmerica	2008
H3g1.1.2.3	CY042756	blue-wingedteal/Minnesota/Sg-00650/2008	Avian	H3	N8	USA	NorthAmerica	2008
H3g1.1.2.3	CY042168	mallard/Minnesota/Sg-00190/2007	Avian	H3	N8	USA	NorthAmerica	2007
H3g1.1.2.3	CY035317	mallard/Minnesota/Sg-00184/2007	Avian	H3	N8	USA	NorthAmerica	2007
H3g1.1.2.3	CY035391	mallard/Minnesota/Sg-00215/2007	Avian	H3	N8	USA	NorthAmerica	2007
H3g1.1.2.3	CY042195	mallard/Minnesota/Sg-00209/2007	Avian	H3	N8	USA	NorthAmerica	2007
H3g1.1.2.3	CY042119	mallard/Minnesota/Sg-00160/2007	Avian	H3	N8	USA	NorthAmerica	2007
H3g1.1.2.3	CY042133	mallard/Minnesota/Sg-00168/2007	Avian	H3	N8	USA	NorthAmerica	2007
H3g1.1.2.3	CY035356	mallard/Minnesota/Sg-00203/2007	Avian	H3	N8	USA	NorthAmerica	2007
H3g1.1.2.3	CY034661	mallardduck/Minnesota/Sg-00098/2007	Avian	H3	N6	USA	NorthAmerica	2007
H3g1.1.2.3	CY043040	mallard/Minnesota/Sg-00765/2008	Avian	H3	N8	USA	NorthAmerica	2008
H3g1.1.2.3	CY042666	mallard/Minnesota/Sg-00629/2008	Avian	H3	N8	USA	NorthAmerica	2008
H3g1.1.2.3	CY042810	northernshoveler/Minnesota/Sg-00664/2008	Avian	H3	N8	USA	NorthAmerica	2008
H3g1.1.2.3	CY042930	mallard/Minnesota/Sg-00696/2008	Avian	H3	N8	USA	NorthAmerica	2008
H3g1.1.2.3	CY042730	mallard/Minnesota/Sg-00643/2008	Avian	H3	N8	USA	NorthAmerica	2008
H3g1.1.2.3	CY042752	blue-wingedteal/Minnesota/Sg-00649/2008	Avian	H3	N8	USA	NorthAmerica	2008
H3g1.1.2.3	CY042823	northernshoveler/Minnesota/Sg-00669/2008	Avian	H3	N8	USA	NorthAmerica	2008
H3g1.1.2.3	CY042827	northernshoveler/Minnesota/Sg-00670/2008	Avian	H3	N8	USA	NorthAmerica	2008
H3g1.1.2.3	CY042792	northernshoveler/Minnesota/Sg-00659/2008	Avian	H3	N8	USA	NorthAmerica	2008
H3g1.1.2.3	CY042802	northernshoveler/Minnesota/Sg-00662/2008	Avian	H3	N8	USA	NorthAmerica	2008
H3g1.1.2.3	CY042618	mallard/Minnesota/Sg-00573/2008	Avian	H3	N8	USA	NorthAmerica	2008
H3g1.1.2.3	CY042698	mallard/Minnesota/Sg-00636/2008	Avian	H3	N8	USA	NorthAmerica	2008
H3g1.1.2.3	CY042806	northernshoveler/Minnesota/Sg-00663/2008	Avian	H3	N8	USA	NorthAmerica	2008
H3g1.1.2.3	CY042819	northernshoveler/Minnesota/Sg-00668/2008	Avian	H3	N8	USA	NorthAmerica	2008
H3g1.1.2.3	CY042772	northernshoveler/Minnesota/Sg-00654/2008	Avian	H3	N8	USA	NorthAmerica	2008
H3g1.1.2.3	CY042784	northernshoveler/Minnesota/Sg-00657/2008	Avian	H3	N8	USA	NorthAmerica	2008
H3g1.1.2.3	CY042788	northernshoveler/Minnesota/Sg-00658/2008	Avian	H3	N8	USA	NorthAmerica	2008
H3g1.1.2.3	CY042796	northernshoveler/Minnesota/Sg-00660/2008	Avian	H3	N8	USA	NorthAmerica	2008
H3g1.1.2.3	CY042713	mallard/Minnesota/Sg-00639/2008	Avian	H3	N8	USA	NorthAmerica	2008
H3g1.1.2.3	CY042734	mallard/Minnesota/Sg-00644/2008	Avian	H3	N8	USA	NorthAmerica	2008
H3g1.1.2.3	CY042613	mallard/Minnesota/Sg-00572/2008	Avian	H3	N1	USA	NorthAmerica	2008
H3g1.1.2.3	CY042811	northernshoveler/Minnesota/Sg-00665/2008	Avian	H3	N1	USA	NorthAmerica	2008
H3g1.1.2.3	CY042798	northernshoveler/Minnesota/Sg-00661/2008	Avian	H3	N1	USA	NorthAmerica	2008
H3g1.1.2.3	CY042764	northernshoveler/Minnesota/Sg-00652/2008	Avian	H3	N8	USA	NorthAmerica	2008
H3g1.1.2.3	CY042352	blue-wingedteal/Minnesota/Sg-00453/2008	Avian	H3	N8	USA	NorthAmerica	2008
H3g1.1.2.3	CY043072	mallard/Minnesota/Sg-00808/2008	Avian	H3	N8	USA	NorthAmerica	2008
H3g1.1.2.3	CY043027	mallard/Minnesota/Sg-00751/2008	Avian	H3	N6	USA	NorthAmerica	2008
H3g1.1.2.3	CY043052	blue-wingedteal/Minnesota/Sg-00780/2008	Avian	H3	N6	USA	NorthAmerica	2008
H3g1.1.2.3	CY042391	mallard/Minnesota/Sg-00463/2008	Avian	H3	N8	USA	NorthAmerica	2008
H3g1.1.2.3	CY043051	green-wingedteal/Minnesota/Sg-00779/2008	Avian	H3	N8	USA	NorthAmerica	2008
H3g1.1.2.3	CY042627	gadwallduck/Minnesota/Sg-00575/2008	Avian	H3	N8	USA	NorthAmerica	2008
H3g1.1.2.3	CY042815	northernshoveler/Minnesota/Sg-00667/2008	Avian	H3	N8	USA	NorthAmerica	2008
H3g1.1.2.3	CY043069	mallard/Minnesota/Sg-00805/2008	Avian	H3	N8	USA	NorthAmerica	2008
H3g1.1.2.3	CY042703	mallard/Minnesota/Sg-00637/2008	Avian	H3	N8	USA	NorthAmerica	2008
H3g1.1.2.3	CY043039	mallard/Minnesota/Sg-00764/2008	Avian	H3	N8	USA	NorthAmerica	2008
H3g1.1.2.3	CY042768	northernshoveler/Minnesota/Sg-00653/2008	Avian	H3	N8	USA	NorthAmerica	2008
H3g1.1.2.3	CY042738	northernshoveler/Minnesota/Sg-00645/2008	Avian	H3	N8	USA	NorthAmerica	2008
H3g1.1.2.3	CY042780	northernshoveler/Minnesota/Sg-00656/2008	Avian	H3	N8	USA	NorthAmerica	2008
H3g1.1.2.3	CY042708	mallard/Minnesota/Sg-00638/2008	Avian	H3	N8	USA	NorthAmerica	2008
H3g1.1.2.3	CY042722	mallard/Minnesota/Sg-00641/2008	Avian	H3	N8	USA	NorthAmerica	2008
H3g1.1.2.3	CY042718	mallard/Minnesota/Sg-00640/2008	Avian	H3	N8	USA	NorthAmerica	2008
H3g1.1.2.3	CY042688	mallard/Minnesota/Sg-00634/2008	Avian	H3	N8	USA	NorthAmerica	2008
H3g1.1.2.3	CY042726	mallard/Minnesota/Sg-00642/2008	Avian	H3	N8	USA	NorthAmerica	2008
H3g1.1.2.3	CY042894	mallard/Minnesota/Sg-00687/2008	Avian	H3	N8	USA	NorthAmerica	2008
H3g1.1.2.3	CY042855	mallard/Minnesota/Sg-00677/2008	Avian	H3	N8	USA	NorthAmerica	2008
H3g1.1.2.3	CY042835	mallard/Minnesota/Sg-00672/2008	Avian	H3	N8	USA	NorthAmerica	2008
H3g1.1.2.3	CY043056	blue-wingedteal/Minnesota/Sg-00790/2008	Avian	H3	N8	USA	NorthAmerica	2008
H3g1.1.2.3	CY043055	blue-wingedteal/Minnesota/Sg-00789/2008	Avian	H3	N8	USA	NorthAmerica	2008
H3g1.1.2.3	CY043054	blue-wingedteal/Minnesota/Sg-00787/2008	Avian	H3	N2	USA	NorthAmerica	2008
H3g1.1.2.3	CY042878	mallard/Minnesota/Sg-00683/2008	Avian	H3	N8	USA	NorthAmerica	2008
H3g1.1.2.3	CY042843	mallard/Minnesota/Sg-00674/2008	Avian	H3	N8	USA	NorthAmerica	2008
H3g1.1.2.3	CY042851	mallard/Minnesota/Sg-00676/2008	Avian	H3	N8	USA	NorthAmerica	2008
H3g1.1.2.3	CY042862	mallard/Minnesota/Sg-00679/2008	Avian	H3	N8	USA	NorthAmerica	2008
H3g1.1.2.3	CY042609	mallard/Minnesota/Sg-00571/2008	Avian	H3	N4	USA	NorthAmerica	2008
H3g1.1.2.3	CY042866	mallard/Minnesota/Sg-00680/2008	Avian	H3	N4	USA	NorthAmerica	2008
H3g1.1.2.3	CY042986	blue-wingedteal/NorthDakota/Sg-00714/2008	Avian	H3	N8	USA	NorthAmerica	2008
H3g1.1.2.3	CY033712	mallardduck/Minnesota/Sg-00072/2007	Avian	H3	N8	USA	NorthAmerica	2007
H3g1.1.2.3	CY043059	mallard/Minnesota/Sg-00795/2008	Avian	H3	N6	USA	NorthAmerica	2008
H3g1.1.2.3	CY035285	mallard/Minnesota/Sg-00169/2007	Avian	H3	N8	USA	NorthAmerica	2007
H3g1.1.2.3	CY033720	blue-wingedteal/Texas/Sg-00079/2007	Avian	H3	N8	USA	NorthAmerica	2007
H3g1.1.2.3	CY041887	green-wingedteal/Minnesota/Sg-00131/2007	Avian	H3	N2	USA	NorthAmerica	2007
H3g1.1.2.3	CY042324	blue-wingedteal/SouthDakota/Sg-00446/2008	Avian	H3	N1	USA	NorthAmerica	2008
H3g1.1.2.3	CY043061	blue-wingedteal/Minnesota/Sg-00797/2008	Avian	H3	N2	USA	NorthAmerica	2008
H3g1.1.2.3	CY017709	mallard/Ohio/156/1990	Avian	H3	N6	USA	NorthAmerica	1990
H3g1.1.2.3	CY045271	mallard/Quebec/16485/2005	Avian	H3	N3	Canada	NorthAmerica	2005
H3g1.1.2.3	CY047592	mallard/Quebec/11040/2006	Avian	H3	N2	Canada	NorthAmerica	2006
H3g1.1.2.3	CY047600	mallard/Quebec/11045/2006	Avian	H3	N2	Canada	NorthAmerica	2006
H3g1.1.2.3	CY047632	mallard/Quebec/11121/2006	Avian	H3	N2	Canada	NorthAmerica	2006
H3g1.1.2.3	CY047648	Americanblackduck/Quebec/11235/2006	Avian	H3	N2	Canada	NorthAmerica	2006
H3g1.1.2.3	CY047656	mallard/Quebec/11247/2006	Avian	H3	N2	Canada	NorthAmerica	2006
H3g1.1.2.3	CY047672	mallard/Quebec/11194/2006	Avian	H3	N2	Canada	NorthAmerica	2006
H3g1.1.2.3	CY047696	Americanblackduck/NewBrunswick/25182/2007	Avian	H3	N6	Canada	NorthAmerica	2007
H3g1.1.2.3	CY020741	mallard/Ohio/654/2002	Avian	H3	N8	USA	NorthAmerica	2002
H3g1.1.2.3	CY020757	mallard/Ohio/649/2002	Avian	H3	N8	USA	NorthAmerica	2002
H3g1.1.2.3	CY043068	mallard/Minnesota/Sg-00804/2008	Avian	H3	N8	USA	NorthAmerica	2008
H3g1.1.2.3	CY043034	blue-wingedteal/NorthDakota/Sg-00759/2008	Avian	H3	N6	USA	NorthAmerica	2008
H3g1.1.2.3	CY033760	mallardduck/Minnesota/Sg-00103/2007	Avian	H3	N8	USA	NorthAmerica	2007
H3g1.1.2.3	CY028692	mallard/Maryland/1235/2006	Avian	H3	N6	USA	NorthAmerica	2006
H3g1.1.2.3	CY022717	mallard/Ohio/1717/2005	Avian	H3	N6	USA	NorthAmerica	2005
H3g1.1.2.3	CY019213	environment/Ohio/994/2005	Environment	H3	N2	USA	NorthAmerica	2005
H3g1.1.2.3	CY020997	environment/Ohio/1001/2005	Environment	H3	N2	USA	NorthAmerica	2005
H3g1.1.2.3	CY037007	blue-wingedteal/Manitoba/13436/2005	Avian	H3	N8	Canada	NorthAmerica	2005
H3g1.1.2.3	CY011048	blue-wingedteal/Ohio/908/2002	Avian	H3	N2	USA	NorthAmerica	2002
H3g1.1.2.3	CY029929	blue-wingedteal/Ohio/1864/2006	Avian	H3	N8	USA	NorthAmerica	2006
H3g1.1.2.3	CY021341	mallard/Ohio/1801/2005	Avian	H3	N8	USA	NorthAmerica	2005
H3g1.1.2.3	AY633172	mallard/Alberta/199/99	Avian	H3	N6	Canada	NorthAmerica	1999
H3g1.1.2.3	AY633372	pintail/Alberta/37/99	Avian	H3	N8	Canada	NorthAmerica	1999
H3g1.1.2.3	CY011028	blue-wingedteal/Ohio/926/2002	Avian	H3	N8	USA	NorthAmerica	2002
H3g1.1.2.3	EU743544	mallard/MN/99/2000	Avian	H3	N6	USA	NorthAmerica	2000
H3g1.1.2.3	FJ517282	mallard/Minnesota/190/1999	Avian	H3	N8	USA	NorthAmerica	1999
H3g1.1.2.3	EU743560	pintail/MN/479/1999	Avian	H3	N6	USA	NorthAmerica	1999
H3g1.1.2.3	EU743552	mallard/MN/515/2000	Avian	H3	N6	USA	NorthAmerica	2000
H3g1.1.2.3	EU871868	mallard/MN/158/2000	Avian	H3	N9	USA	NorthAmerica	2000
H3g1.1.3.1	CY005943	mallardduck/ALB/26/1976	Avian	H3	N1	Canada	NorthAmerica	1976
H3g1.1.3.1	CY021429	mallard/Ohio/181/1986	Avian	H3	N1	USA	NorthAmerica	1986
H3g1.1.3.1	CY017837	green-wingedteal/Ohio/466/1987	Avian	H3	N8	USA	NorthAmerica	1987
H3g1.1.3.1	CY017861	northernshoveler/Ohio/454/1987	Avian	H3	N8	USA	NorthAmerica	1987
H3g1.1.3.1	CY016140	pintail/Ohio/454/1987	Avian	H3	N8	USA	NorthAmerica	1987
H3g1.1.3.2	M16741	duck/21/1982	Avian	H3	N0	Japan	Asia	1982
H3g1.1.3.2	CY043002	blue-wingedteal/NorthDakota/Sg-00721/2008	Avian	H3	N8	USA	NorthAmerica	2008
H3g1.1.3.2	CY043033	blue-wingedteal/NorthDakota/Sg-00758/2008	Avian	H3	N8	USA	NorthAmerica	2008
H3g1.1.3.2	CY043017	blue-wingedteal/NorthDakota/Sg-00739/2008	Avian	H3	N8	USA	NorthAmerica	2008
H3g1.1.3.2	CY043016	blue-wingedteal/NorthDakota/Sg-00738/2008	Avian	H3	N8	USA	NorthAmerica	2008
H3g1.1.3.2	CY043004	blue-wingedteal/NorthDakota/Sg-00723/2008	Avian	H3	N8	USA	NorthAmerica	2008
H3g1.1.3.2	CY043044	mallard/Minnesota/Sg-00770/2008	Avian	H3	N6	USA	NorthAmerica	2008
H3g1.1.3.2	EU871852	ruddyturnstone/NJ/357/2005	Avian	H3	N6	USA	NorthAmerica	2005
H3g1.1.3.2	EU871860	sanderling/NJ/1042/2005	Avian	H3	N6	USA	NorthAmerica	2005
H3g1.1.3.2	CY021157	environment/Delaware/245/2005	Environment	H3	N6	USA	NorthAmerica	2005
H3g1.1.3.2	EU871844	ruddyturnstone/NJ/335/2005	Avian	H3	N6	USA	NorthAmerica	2005
H3g1.1.3.2	CY021229	environment/Delaware/251/2005	Environment	H3	N6	USA	NorthAmerica	2005
H3g1.1.3.2	CY038171	ruddyturnstone/NewJersey/Sg-00525/2008	Avian	H3	N8	USA	NorthAmerica	2008
H3g1.1.3.2	CY038156	ruddyturnstone/NewJersey/Sg-00513/2008	Avian	H3	N2	USA	NorthAmerica	2008
H3g1.1.3.2	CY042495	ruddyturnstone/NewJersey/Sg-00519/2008	Avian	H3	N2	USA	NorthAmerica	2008
H3g1.1.3.2	CY042583	ruddyturnstone/NewJersey/Sg-00555/2008	Avian	H3	N2	USA	NorthAmerica	2008
H3g1.1.3.2	CY042575	ruddyturnstone/NewJersey/Sg-00553/2008	Avian	H3	N7	USA	NorthAmerica	2008
H3g1.1.3.2	CY038031	ruddyturnstone/Delaware/Sg-00469/2008	Avian	H3	N2	USA	NorthAmerica	2008
H3g1.1.3.2	CY038161	ruddyturnstone/NewJersey/Sg-00518/2008	Avian	H3	N2	USA	NorthAmerica	2008
H3g1.1.3.2	CY038166	ruddyturnstone/NewJersey/Sg-00522/2008	Avian	H3	N7	USA	NorthAmerica	2008
H3g1.1.3.2	CY042514	ruddyturnstone/NewJersey/Sg-00529/2008	Avian	H3	N2	USA	NorthAmerica	2008
H3g1.1.3.2	CY042554	ruddyturnstone/NewJersey/Sg-00543/2008	Avian	H3	N7	USA	NorthAmerica	2008
H3g1.1.3.2	FJ517296	mallard/Minnesota/354/1999	Avian	H3	N8	USA	NorthAmerica	1999
H3g1.1.3.2	CY022725	environment/Maryland/1175/2005	Environment	H3	N8	USA	NorthAmerica	2005
H3g1.1.3.2	CY021309	environment/Maryland/1165/2005	Environment	H3	N8	USA	NorthAmerica	2005
H3g1.1.3.2	CY024802	environment/Maryland/1158/2005	Environment	H3	N8	USA	NorthAmerica	2005
H3g1.1.3.2	CY022733	environment/Maryland/1172/2005	Environment	H3	N6	USA	NorthAmerica	2005
H3g1.1.3.2	CY021317	green-wingedteal/Ohio/1289/2005	Avian	H3	N8	USA	NorthAmerica	2005
H3g1.1.3.2	CY025085	environment/Maryland/1174/2005	Environment	H3	N6	USA	NorthAmerica	2005
H3g1.1.3.2	CY021285	environment/Maryland/1176/2005	Environment	H3	N6	USA	NorthAmerica	2005
H3g1.1.3.2	EU557506	northernpintail/Alaska/44204-075/2006	Avian	H3	N8	USA	NorthAmerica	2006
H3g1.1.3.2	EU557507	northernpintail/Alaska/44204-108/2006	Avian	H3	N1	USA	NorthAmerica	2006
H3g1.1.3.2	EU557497	northernpintail/Alaska/44194-041/2006	Avian	H3	N6	USA	NorthAmerica	2006
H3g1.1.3.2	EU557498	northernpintail/Alaska/44194-071/2006	Avian	H3	N6	USA	NorthAmerica	2006
H3g1.1.3.2	EF655846	pintail/Barrow/155/2005	Avian	H3	N8	USA	NorthAmerica	2005
H3g1.1.3.2	CY043936	northernpintail/Alaska/7MP0344/2007	Avian	H3	N8	USA	NorthAmerica	2007
H3g1.1.3.2	CY045407	northernpintail/InteriorAlaska/7MP0343/2007	Avian	H3	N8	USA	NorthAmerica	2007
H3g1.1.3.2	CY043000	blue-wingedteal/NorthDakota/Sg-00719/2008	Avian	H3	N8	USA	NorthAmerica	2008
H3g1.1.3.2	CY043006	blue-wingedteal/NorthDakota/Sg-00725/2008	Avian	H3	N6	USA	NorthAmerica	2008
H3g1.1.3.2	EU557499	northernpintail/Alaska/44182-129/2006	Avian	H3	N8	USA	NorthAmerica	2006
H3g1.1.3.2	EU557500	northernpintail/Alaska/44184-003/2006	Avian	H3	N8	USA	NorthAmerica	2006
H3g1.1.3.2	EU557496	northernpintail/Alaska/44187-100/2006	Avian	H3	N6	USA	NorthAmerica	2006
H3g1.1.3.2	CY035877	mallard/InteriorAlaska/1/2007	Avian	H3	N8	USA	NorthAmerica	2007
H3g1.1.3.2	CY035815	northernshoveler/InteriorAlaska/1/2007	Avian	H3	N8	USA	NorthAmerica	2007
H3g1.1.3.2	CY038362	mallard/InteriorAlaska/3/2007	Avian	H3	N8	USA	NorthAmerica	2007
H3g1.1.3.2	CY043984	northernpintail/Alaska/7MP1092/2007	Avian	H3	N8	USA	NorthAmerica	2007
H3g1.1.3.2	CY039794	northernshoveler/InteriorAlaska/3/2007	Avian	H3	N8	USA	NorthAmerica	2007
H3g1.1.3.2	CY039763	northernshoveler/InteriorAlaska/2/2007	Avian	H3	N8	USA	NorthAmerica	2007
H3g1.1.3.2	CY039873	mallard/InteriorAlaska/8/2007	Avian	H3	N8	USA	NorthAmerica	2007
H3g1.1.3.2	CY039818	mallard/InteriorAlaska/5/2007	Avian	H3	N8	USA	NorthAmerica	2007
H3g1.1.3.2	CY047035	mallard/InteriorAlaska/7MP1757/2007	Avian	H3	N8	USA	NorthAmerica	2007
H3g1.1.3.2	CY047512	mallard/Alberta/11527/2005	Avian	H3	N8	Canada	NorthAmerica	2005
H3g1.1.3.2	EU557501	northernpintail/Alaska/44244-108/2006	Avian	H3	N8	USA	NorthAmerica	2006
H3g1.1.3.2	CY017757	pintail/Alaska/779/2005	Avian	H3	N8	USA	NorthAmerica	2005
H3g1.1.3.2	CY039850	mallard/InteriorAlaska/7/2007	Avian	H3	N8	USA	NorthAmerica	2007
H3g1.1.3.2	CY039755	mallard/InteriorAlaska/6/2007	Avian	H3	N8	USA	NorthAmerica	2007
H3g1.1.3.2	CY044024	northernshoveler/Alaska/7MP1668/2007	Avian	H3	N8	USA	NorthAmerica	2007
H3g1.1.3.2	CY038378	mallard/InteriorAlaska/4/2007	Avian	H3	N8	USA	NorthAmerica	2007
H3g1.1.3.2	CY038386	Americangreen-wingedteal/InteriorAlaska/3/2007	Avian	H3	N8	USA	NorthAmerica	2007
H3g1.1.3.2	CY039826	northernshoveler/InteriorAlaska/4/2007	Avian	H3	N8	USA	NorthAmerica	2007
H3g1.1.3.2	CY043960	northernshoveler/Alaska/7MP1026/2007	Avian	H3	N8	USA	NorthAmerica	2007
H3g1.1.3.2	CY043976	Americanwidgeon/Alaska/7MP1061/2007	Avian	H3	N8	USA	NorthAmerica	2007
H3g1.1.3.2	CY045447	northernpintail/Alaska/7MP0508/2007	Avian	H3	N8	USA	NorthAmerica	2007
H3g1.1.3.2	CY047027	Americangreen-wingedteal/InteriorAlaska/7MP2225/2007	Avian	H3	N8	USA	NorthAmerica	2007
H3g1.1.3.2	EU557494	northernpintail/Alaska/44183-067/2006	Avian	H3	N8	USA	NorthAmerica	2006
H3g1.1.3.2	EU557505	northernpintail/Alaska/44202-126/2006	Avian	H3	N8	USA	NorthAmerica	2006
H3g1.1.3.2	FJ520096	northernpintail/California/44221-794/2006	Avian	H3	N8	USA	NorthAmerica	2006
H3g1.1.3.2	EU557508	northernpintail/Alaska/44202-103/2006	Avian	H3	N8	USA	NorthAmerica	2006
H3g1.1.3.2	CY036659	green-wingedteal/InteriorAlaska/1/2007	Avian	H3	N8	USA	NorthAmerica	2007
H3g1.1.3.2	CY043944	northernpintail/Alaska/7MP0608/2007	Avian	H3	N8	USA	NorthAmerica	2007
H3g1.1.3.2	AY633340	pintail/Alberta/156/97	Avian	H3	N8	Canada	NorthAmerica	1997
H3g1.1.3.2	FJ520091	northernpintail/California/44242-836/2006	Avian	H3	N6	USA	NorthAmerica	2006
H3g1.1.3.2	CY004702	mallard/Alberta/156/2001	Avian	H3	N8	Canada	NorthAmerica	2001
H3g1.1.3.2	CY035799	mallard/InteriorAlaska/2/2007	Avian	H3	N8	USA	NorthAmerica	2007
H3g1.1.3.2	CY047528	northernpintail/Alberta/11701/2005	Avian	H3	N8	Canada	NorthAmerica	2005
H3g1.1.3.2	AY633244	mallard/Alberta/242/98	Avian	H3	N8	Canada	NorthAmerica	1998
H3g1.1.3.2	AY633132	mallard/Alberta/117/97	Avian	H3	N8	Canada	NorthAmerica	1997
H3g1.1.3.2	CY004692	mallard/ALB/118/1995	Avian	H3	N5	Canada	NorthAmerica	1995
H3g1.1.3.2	CY014548	mallardduck/Alberta/331/1985	Avian	H3	N6	Canada	NorthAmerica	1985
H3g1.1.3.2	M73772	duck/Memphis/928/1974	Avian	H3	N8	USA	NorthAmerica	1974
H3g1.1.3.2	FJ520098	northernpintail/California/44241-743/2006	Avian	H3	N8	USA	NorthAmerica	2006
H3g1.1.3.2	CY016411	mallard/Alaska/715/2005	Avian	H3	N8	USA	NorthAmerica	2005
H3g1.1.3.2	CY013263	pintail/Alaska/53/2005	Avian	H3	N6	USA	NorthAmerica	2005
H3g1.1.3.2	CY015492	mallard/Alaska/256/2005	Avian	H3	N8	USA	NorthAmerica	2005
H3g1.1.3.2	CY015500	pintail/Alaska/279/2005	Avian	H3	N8	USA	NorthAmerica	2005
H3g1.1.3.2	CY020877	pintail/Alaska/49/2005	Avian	H3	N8	USA	NorthAmerica	2005
H3g1.1.3.2	CY016180	pintail/Alaska/211/2005	Avian	H3	N8	USA	NorthAmerica	2005
H3g1.1.3.2	AY633252	mallard/Alberta/279/98	Avian	H3	N8	Canada	NorthAmerica	1998
H3g1.1.3.2	EU743530	mallard/MN/280/1999	Avian	H3	N5	USA	NorthAmerica	1999
H3g1.1.3.2	FJ517289	mallard/Minnesota/283/1999	Avian	H3	N8	USA	NorthAmerica	1999
H3g1.1.3.2	EU743516	mallard/MN/330/1999	Avian	H3	N1	USA	NorthAmerica	1999
H3g1.1.3.2	EU743524	mallard/MN/351/1999	Avian	H3	N1	USA	NorthAmerica	1999
H3g1.1.3.2	EU743508	mallard/MN/380/1999	Avian	H3	N2	USA	NorthAmerica	1999
H3g1.1.3.2	EU743495	mallard/MN/68/1999	Avian	H3	N2	USA	NorthAmerica	1999
H3g1.1.3.2	EU743501	mallard/MN/290/1999	Avian	H3	N2	USA	NorthAmerica	1999
H3g1.1.3.2	CY043022	blue-wingedteal/NorthDakota/Sg-00745/2008	Avian	H3	N8	USA	NorthAmerica	2008
H3g1.1.3.2	CY042958	blue-wingedteal/NorthDakota/Sg-00704/2008	Avian	H3	N8	USA	NorthAmerica	2008
H3g1.1.3.2	AY633148	mallard/Alberta/127/00	Avian	H3	N8	Canada	NorthAmerica	2000
H3g1.1.3.2	CY042121	mallard/Minnesota/Sg-00161/2007	Avian	H3	N8	USA	NorthAmerica	2007
H3g1.1.3.2	CY033756	mallardduck/Minnesota/Sg-00100/2007	Avian	H3	N3	USA	NorthAmerica	2007
H3g1.1.3.2	CY035334	mallard/Minnesota/Sg-00192/2007	Avian	H3	N8	USA	NorthAmerica	2007
H3g1.1.3.2	CY042063	mallardduck/Minnesota/Sg-00097/2007	Avian	H3	N8	USA	NorthAmerica	2007
H3g1.1.3.2	CY035299	mallard/Minnesota/Sg-00174/2007	Avian	H3	N6	USA	NorthAmerica	2007
H3g1.1.3.2	CY042156	mallard/Minnesota/Sg-00185/2007	Avian	H3	N6	USA	NorthAmerica	2007
H3g1.1.3.2	CY035352	mallard/Minnesota/Sg-00202/2007	Avian	H3	N8	USA	NorthAmerica	2007
H3g1.1.3.2	CY033779	mallardduck/Minnesota/Sg-00119/2007	Avian	H3	N8	USA	NorthAmerica	2007
H3g1.1.3.2	CY033771	mallardduck/Minnesota/Sg-00116/2007	Avian	H3	N6	USA	NorthAmerica	2007
H3g1.1.3.2	CY035379	mallard/Minnesota/Sg-00211/2007	Avian	H3	N8	USA	NorthAmerica	2007
H3g1.1.3.2	CY033707	mallardduck/Minnesota/Sg-00064/2007	Avian	H3	N8	USA	NorthAmerica	2007
H3g1.1.3.2	CY034626	blue-wingedteal/Minnesota/Sg-00037/2007	Avian	H3	N8	USA	NorthAmerica	2007
H3g1.1.3.2	CY033691	mallardduck/Minnesota/Sg-00048/2007	Avian	H3	N8	USA	NorthAmerica	2007
H3g1.1.3.2	CY033693	mallardduck/Minnesota/Sg-00051/2007	Avian	H3	N8	USA	NorthAmerica	2007
H3g1.1.3.2	CY034630	mallardduck/Minnesota/Sg-00047/2007	Avian	H3	N8	USA	NorthAmerica	2007
H3g1.1.3.2	CY034639	mallardduck/Minnesota/Sg-00061/2007	Avian	H3	N8	USA	NorthAmerica	2007
H3g1.1.3.2	CY034642	ring-neckedduck/Minnesota/Sg-00069/2007	Avian	H3	N8	USA	NorthAmerica	2007
H3g1.1.3.2	CY033703	mallardduck/Minnesota/Sg-00059/2007	Avian	H3	N8	USA	NorthAmerica	2007
H3g1.1.3.2	CY005942	mallard/ALB/394/1988	Avian	H3	N3	Canada	NorthAmerica	1988
H3g1.1.3.2	CY005938	pintailduck/ALB/462/1979	Avian	H3	N6	Canada	NorthAmerica	1979
H3g1.1.3.2	CY005935	pintailduck/ALB/86/1976	Avian	H3	N2	Canada	NorthAmerica	1976
H3g1.1.3.2	M73771	duck/Alberta/78/1976	Avian	H3	N2	Canada	NorthAmerica	1976
H3g1.1.3.2	CY005940	blue-wingedteal/ALB/452/1983	Avian	H3	N1	Canada	NorthAmerica	1983
H3g1.1.3.2	CY005937	green-wingedteal/ALB/438/1979	Avian	H3	N8	Canada	NorthAmerica	1979
H3g1.1.3.2	CY005915	mallardduck/ALB/564/1979	Avian	H3	N8	Canada	NorthAmerica	1979
H3g1.1.3.2	CY005977	pintailduck/ALB/169/1980	Avian	H3	N8	Canada	NorthAmerica	1980
H3g1.1.3.2	CY005939	pintailduck/ALB/627/1979	Avian	H3	N2	Canada	NorthAmerica	1979
H3g1.1.3.2	CY005916	mallardduck/ALB/676/1979	Avian	H3	N6	Canada	NorthAmerica	1979
H3g1.1.3.2	CY004662	mallardduck/ALB/525/1985	Avian	H3	N8	Canada	NorthAmerica	1985
H3g1.1.3.2	CY019197	pintail/Ohio/339/1987	Avian	H3	N8	USA	NorthAmerica	1987
H3g1.1.3.2	CY004657	mallardduck/ALB/438/1985	Avian	H3	N4	Canada	NorthAmerica	1985
H3g1.1.3.2	CY004670	blue-wingedteal/ALB/569/1985	Avian	H3	N8	Canada	NorthAmerica	1985
H3g1.1.3.2	CY005941	mallardduck/ALB/635/1983	Avian	H3	N5	Canada	NorthAmerica	1983
H3g1.1.3.2	CY005917	mallardduck/ALB/31/1976	Avian	H3	N8	Canada	NorthAmerica	1976
H3g1.1.3.2	CY005936	mallardduck/ALB/712/1978	Avian	H3	N3	Canada	NorthAmerica	1978
H3g1.2	CY006035	duck/NZL/38/1984	Avian	H3	N8	NewZealand	Oceania	1984
H3g1.3.1	D00930	Gs/HK/10/1976	Avian	H3	N0	HongKong	Asia	1976
H3g1.3.1	D00931	duck/HongKong/64/76	Avian	H3	N0	HongKong	Asia	1976
H3g1.3.1	M16738	duck/8/1980	Avian	H3	N0	Japan	Asia	1980
H3g1.3.1	AB275283	Duck/Hokkaido/8/80	Avian	H3	N8	Japan	Asia	1980
H3g1.3.1	AF079570	Duck/Hokkaido/8/80	Avian	H3	N8	Japan	Asia	1980
H3g1.3.1	M19056	swine/HongKong/126/1982	Swine	H3	N2	HongKong	Asia	1982
H3g1.3.1	CY006026	duck/HongKong/7/1975	Avian	H3	N2	HongKong	Asia	1975
H3g1.3.1	D00929	DK/HK/7/1975	Avian	H3	N0	HongKong	Asia	1975
H3g1.3.1	AB277754	duck/Hokkaido/5/1977	Avian	H3	N2	Japan	Asia	1977
H3g1.3.1	M16737	duck/5/1977	Avian	H3	N0	Japan	Asia	1977
H3g1.3.1	AB292402	duck/HongKong/836/1980	Avian	H3	N1	HongKong	Asia	1980
H3g1.3.1	D21172	duck/HongKong/940/1980	Avian	H3	N2	HongKong	Asia	1980
H3g1.3.1	AB276113	duck/Hokkaido/10/1985	Avian	H3	N8	Japan	Asia	1985
H3g1.3.1	M16743	duck/10/1985	Avian	H3	N0	Japan	Asia	1985
H3g1.3.1	M16742	duck/9/1985	Avian	H3	N0	Japan	Asia	1985
H3g1.3.1	D21171	duck/HongKong/245/1977	Avian	H3	N2	HongKong	Asia	1977
H3g1.3.1	M16739	duck/33/1980	Avian	H3	N0	Japan	Asia	1980
H3g1.3.1	AB292410	duck/HongKong/22	Avian	H3	N3	HongKong	Asia	1976
H3g1.3.1	AB292660	duck/HongKong/22B/1976	Avian	H3	N6	HongKong	Asia	1976
H3g1.3.1	D00932	duck/HongKong/231/77	Avian	H3	N0	HongKong	Asia	1977
H3g1.3.1	M16740	duck/7/1982	Avian	H3	N0	Japan	Asia	1982
H3g1.3.1	M19057	swine/HongKong/81/1978	Swine	H3	N2	HongKong	Asia	1978
H3g1.3.1	CY014702	duck/Chabarovsk/1610/1972	Avian	H3	N8	Russia	Europe	1972
H3g1.3.1	CY014621	shearwater/Australia/405/1978	Avian	H3	N8	Australia	Oceania	1977
H3g1.3.1	CY028652	wedge-tailedshearwater/WesternAustralia/405/1977	Avian	H3	N8	Australia	Oceania	1977
H3g1.3.1	CY041306	blackduck/WesternAustralia/702/1978	Avian	H3	N8	Australia	Oceania	1978
H3g1.3.1	CY006031	blackduck/AUS/751/1978	Avian	H3	N8	Australia	Oceania	1978
H3g1.3.1	CY028636	blackduck/Perth/699/1978	Avian	H3	N8	Australia	Oceania	1978
H3g1.3.1	CY028267	blackduck/WesternAustralia/4954/1983	Avian	H3	N8	Australia	Oceania	1983
H3g1.3.1	CY014633	red-neckedstint/Australia/4500/1980	Avian	H3	N8	Australia	Oceania	1980
H3g1.3.1	CY028275	red-neckedstint/Bunbury/4500/1980	Avian	H3	N8	Australia	Oceania	1980
H3g1.3.1	CY028283	red-neckedstint/WesternAustralia/4923/1983	Avian	H3	N8	Australia	Oceania	1983
H3g1.3.1	CY029897	red-neckedstint/WesternAustralia/4915/1984	Avian	H3	N8	Australia	Oceania	1984
H3g1.3.2	EF041487	duck/SouthAfrica/1108/2004	Avian	H3	N8	SouthAfrica	Africa	2004
H3g1.3.2	AB470296	pelican/Zambia/01/2006	Avian	H3	N6	Zambia	Africa	2006
H3g1.3.2	EU912502	duck/Korea/S71/2007	Avian	H3	N2	SouthKorea	Asia	2007
H3g1.3.2	EU912503	duck/Korea/S72/2007	Avian	H3	N2	SouthKorea	Asia	2007
H3g1.3.2	EU301237	duck/Korea/LPM86/2006	Avian	H3	N2	SouthKorea	Asia	2006
H3g1.3.2	EU301215	aquaticbird/Korea/JN-2/2006	Avian	H3	N2	SouthKorea	Asia	2006
H3g1.3.2	EU301238	chicken/Korea/LPM88/2006	Avian	H3	N2	SouthKorea	Asia	2006
H3g1.3.2	EU301239	duck/Korea/LPM91/2006	Avian	H3	N2	SouthKorea	Asia	2006
H3g1.3.2	EU301240	duck/Korea/LPM92/2006	Avian	H3	N2	SouthKorea	Asia	2006
H3g1.3.2	EU301228	duck/Korea/LPM36/2005	Avian	H3	N6	SouthKorea	Asia	2005
H3g1.3.2	EU301229	duck/Korea/LPM38/2005	Avian	H3	N6	SouthKorea	Asia	2005
H3g1.3.2	EU301230	duck/Korea/LPM39/2005	Avian	H3	N2	SouthKorea	Asia	2005
H3g1.3.2	EU301234	chicken/Korea/LPM61/2005	Avian	H3	N2	SouthKorea	Asia	2005
H3g1.3.2	EU301233	duck/Korea/LPM56/2005	Avian	H3	N2	SouthKorea	Asia	2005
H3g1.3.2	EU301235	duck/Korea/LPM66/2006	Avian	H3	N2	SouthKorea	Asia	2006
H3g1.3.2	EU301236	chicken/Korea/LPM67/2006	Avian	H3	N2	SouthKorea	Asia	2006
H3g1.3.2	EU301223	duck/Korea/LPM09/2004	Avian	H3	N2	SouthKorea	Asia	2004
H3g1.3.2	EU301222	chicken/Korea/LPM03/2004	Avian	H3	N2	SouthKorea	Asia	2004
H3g1.3.2	EU301221	duck/Korea/LPM01/2004	Avian	H3	N2	SouthKorea	Asia	2004
H3g1.3.2	EU301224	chicken/Korea/LPM17/2004	Avian	H3	N2	SouthKorea	Asia	2004
H3g1.3.2	EU301225	duck/Korea/LPM18/2004	Avian	H3	N2	SouthKorea	Asia	2004
H3g1.3.2	EU301226	duck/Korea/LPM22/2005	Avian	H3	N2	SouthKorea	Asia	2005
H3g1.3.2	EU301227	duck/Korea/LPM23/2005	Avian	H3	N2	SouthKorea	Asia	2005
H3g1.3.2	EU301231	chicken/Korea/LPM43/2005	Avian	H3	N2	SouthKorea	Asia	2005
H3g1.3.2	EU301232	chicken/Korea/LPM44/2005	Avian	H3	N2	SouthKorea	Asia	2005
H3g1.3.2	AY862611	duck/Korea/S10/03	Avian	H3	N2	SouthKorea	Asia	2003
H3g1.3.2	AY862612	dove/Korea/S11/03	Avian	H3	N2	SouthKorea	Asia	2003
H3g1.3.2	AY862610	duck/Korea/S9/03	Avian	H3	N2	SouthKorea	Asia	2003
H3g1.3.2	AY862607	chicken/Korea/S6/03	Avian	H3	N2	SouthKorea	Asia	2003
H3g1.3.2	AY862608	duck/Korea/S7/03	Avian	H3	N2	SouthKorea	Asia	2003
H3g1.3.2	AY862609	duck/Korea/S8/03	Avian	H3	N2	SouthKorea	Asia	2003
H3g1.3.2	EU912501	duck/Korea/S28/2005	Avian	H3	N6	SouthKorea	Asia	2005
H3g1.3.2	CY006015	Duck/Nanchang/8-174/2000	Avian	H3	N6	China	Asia	2000
H3g1.3.2	M65018	equine/Jilin/1/1989	Equine	H3	N8	China	Asia	1989
H3g1.3.2	CY006014	Quail/Nanchang/7-026/2000	Avian	H3	N6	China	Asia	2000
H3g1.3.2	CY006013	Chicken/Nanchang/7-010/2000	Avian	H3	N6	China	Asia	2000
H3g1.3.2	AB289341	swan/Shimane/227/01	Avian	H3	N9	Japan	Asia	2001
H3g1.3.2	EU492533	duck/Beijing/59/05	Avian	H3	N8	China	Asia	2005
H3g1.3.2	EU492531	duck/Beijing/44/04	Avian	H3	N8	China	Asia	2004
H3g1.3.2	EU492534	duck/Beijing/61/05	Avian	H3	N8	China	Asia	2005
H3g1.3.2	EU492530	duck/Beijing/40/04	Avian	H3	N8	China	Asia	2004
H3g1.3.2	EU492529	duck/Beijing/33/04	Avian	H3	N8	China	Asia	2004
H3g1.3.2	EU492532	duck/Beijing/56/05	Avian	H3	N8	China	Asia	2005
H3g1.3.2	EU301210	aquaticbird/Korea/CN-1/2004	Avian	H3	N6	SouthKorea	Asia	2004
H3g1.3.2	EU301213	aquaticbird/Korea/CN-4/2006	Avian	H3	N3	SouthKorea	Asia	2006
H3g1.3.2	CY006016	duck/Nanchang/1681/1992	Avian	H3	N8	China	Asia	1992
H3g1.3.2	EU301220	aquaticbird/Korea/KN-5/2006	Avian	H3	N6	SouthKorea	Asia	2006
H3g1.3.2	CY040966	chicken/Laos/A0573/2007	Avian	H3	N8	Laos	Asia	2007
H3g1.3.2	EU301212	aquaticbird/Korea/CN-3/2005	Avian	H3	N1	SouthKorea	Asia	2005
H3g1.3.2	AJ427297	aquaticbird/HongKong/399/99	Avian	H3	N8	HongKong	Asia	1999
H3g1.3.2	AJ427304	petbird/HongKong/1559/99	Avian	H3	N8	HongKong	Asia	1999
H3g1.3.2	CY006011	Pigeon/Nanchang/9-058/2000	Avian	H3	N3	China	Asia	2000
H3g1.3.2	CY006012	bantam/Nanchang/9-366/2000	Avian	H3	N3	China	Asia	2000
H3g1.3.2	EU301214	aquaticbird/Korea/JN-1/2005	Avian	H3	N8	SouthKorea	Asia	2005
H3g1.3.2	EU301219	aquaticbird/Korea/KN-4/2005	Avian	H3	N8	SouthKorea	Asia	2005
H3g1.3.2	EU301217	aquaticbird/Korea/KN-2/2005	Avian	H3	N2	SouthKorea	Asia	2005
H3g1.3.2	EU301216	aquaticbird/Korea/KN-1/2004	Avian	H3	N8	SouthKorea	Asia	2004
H3g1.3.2	EU301218	aquaticbird/Korea/KN-3/2005	Avian	H3	N8	SouthKorea	Asia	2005
H3g1.3.2	DQ021910	swine/InnerMongolia/547/2001	Swine	H3	N2	China	Asia	2001
H3g1.3.2	AY531037	turkey/England/69	Avian	H3	N2	UnitedKingdom	Europe	1969
H3g1.3.2	GQ247846	psittacine/Italy/2873/2000	Avian	H3	N8	Italy	Europe	2000
H3g1.3.2	AJ841293	duck/Norway/1/03	Avian	H3	N8	Norway	Europe	2003
H3g1.3.2	AY531031	Mallard/65112/03	Avian	H3	N8	Denmark	Europe	2003
H3g1.3.2	EU493448	mallard/Finland/12072/06	Avian	H3	N8	Finland	Europe	2006
H3g1.3.2	GQ415320	mallard/Switzerland/WV4060167/2006	Avian	H3	N5	Switzerland	Europe	2006
H3g1.3.2	CY041338	commoneider/Netherlands/1/2006	Avian	H3	N8	Netherlands	Europe	2006
H3g1.3.2	CY041346	turnstone/Netherlands/1/2007	Avian	H3	N8	Netherlands	Europe	2007
H3g1.3.2	GQ240821	mallard/Hungary/19616/2007	Avian	H3	N8	Hungary	Europe	2007
H3g1.3.2	FJ432762	duck/Italy/194659/2006	Avian	H3	N2	Italy	Europe	2006
H3g1.3.2	CY043816	mallard/Netherlands/1/2007	Avian	H3	N2	Netherlands	Europe	2007
H3g1.3.2	FN386461	Anasplathyrhynchos/Spain/0454/2006	Avian	H3	N8	Spain	Europe	2006
H3g1.3.2	AB450457	duck/Siberia/100/2001	Avian	H3	N8	Russia	Europe	2001
H3g1.3.2	CY041242	mallard/Netherlands/3/2005	Avian	H3	N8	Netherlands	Europe	2005
H3g1.3.2	CY006038	duck/UKR/1/1963	Avian	H3	N8	Ukraine	Europe	1963
H3g1.3.2	AB292668	duck/Ukraine/1963	Avian	H3	N8	Ukraine	Europe	1963
H3g1.3.2	V01087	duck/Ukraine/1/63	Avian	H3	N8	Ukraine	Europe	1963
H3g1.3.2	AJ506781	teal/Germany/wv201r/01)	Avian	H3	N0	Germany	Europe	2001
H3g1.3.2	CY039802	Americangreen-wingedteal/InteriorAlaska/4/2007	Avian	H3	N8	USA	NorthAmerica	2007
H3g1.3.2	CY035807	Americanwidgeon/InteriorAlaska/1/2007	Avian	H3	N8	USA	NorthAmerica	2007
H3g1.3.2	CY045431	mallard/InteriorAlaska/7MP0709/2007	Avian	H3	N8	USA	NorthAmerica	2007
H3g1.3.2	CY039778	northernpintail/InteriorAlaska/1/2007	Avian	H3	N8	USA	NorthAmerica	2007
H3g1.3.2	EU557495	northernpintail/Alaska/44183-072/2006	Avian	H3	N8	USA	NorthAmerica	2006
H3g1.3.2	CY044008	northernshoveler/Alaska/7MP1606/2007	Avian	H3	N8	USA	NorthAmerica	2007
H3g1.3.2	CY045439	northernshoveler/Alaska/7MP1708/2007	Avian	H3	N8	USA	NorthAmerica	2007
H3g1.3.2	EU557492	northernpintail/Alaska/44155-158/2006	Avian	H3	N8	USA	NorthAmerica	2006
H3g1.3.2	EU557493	northernpintail/Alaska/44160-044/2006	Avian	H3	N8	USA	NorthAmerica	2006
H3g1.3.2	EU557502	northernpintail/Alaska/44228-129/2006	Avian	H3	N8	USA	NorthAmerica	2006
H3g1.3.2	EU557504	northernpintail/Alaska/44228-175/2006	Avian	H3	N8	USA	NorthAmerica	2006
H3g1.3.2	EU557503	northernpintail/Alaska/44228-173/2006	Avian	H3	N8	USA	NorthAmerica	2006
H3g1.3.2	CY028644	duck/Victoria/1992	Avian	H3	N8	Australia	Oceania	1992
H3g1.4	D21182	swine/HongKong/127/1982	Swine	H3	N2	HongKong	Asia	1982
H3g1.4	D21179	swine/HongKong/72/77	Swine	H3	N2	HongKong	Asia	1977
H3g1.4	D21180	swine/HongKong/81/1978	Swine	H3	N2	HongKong	Asia	1978
H3g1.4	D21181	swine/HongKong/82/78	Swine	H3	N2	HongKong	Asia	1978
H3g1.4	D21176	swine/HongKong/6/1976	Swine	H3	N2	HongKong	Asia	1976
H3g1.4	D21177	swine/HongKong/13/77	Swine	H3	N2	HongKong	Asia	1977
H3g1.4	D21178	swine/HongKong/21/77	Swine	H3	N2	HongKong	Asia	1977
H3g1.4	D21175	swine/HongKong/3/1976	Swine	H3	N2	HongKong	Asia	1976
H3g1.4	EF493185	kunke/1/71	Human	H3	N2	China	Asia	1971
H3g1.4	EF626615	HongKong/107/1971	Human	H3	N2	HongKong	Asia	1971
H3g1.4	CY006307	HongKong/50/72	Human	H3	N2	HongKong	Asia	1972
H3g1.4	CY003552	HongKong/6/72	Human	H3	N2	HongKong	Asia	1972
H3g1.4	EU501119	Human/HongKong/1/68	Human	H3	N2	HongKong	Asia	1968
H3g1.4	AF201874	HongKong/1/68	Human	H3	N2	HongKong	Asia	1968
H3g1.4	CY006683	HongKong/46/71	Human	H3	N2	HongKong	Asia	1971
H3g1.4	CY003728	HongKong/43/75	Human	H3	N2	HongKong	Asia	1975
H3g1.4	CY006044	Beijing/39/75	Human	H3	N2	China	Asia	1975
H3g1.4	DQ021911	swine/Heilongjiang/74/2000	Swine	H3	N2	China	Asia	2000
H3g1.4	FJ830855	swine/Guangdong/01/2002	Swine	H3	N2	China	Asia	2002
H3g1.4	EU273774	swine/Heilongjiang/1/05	Swine	H3	N2	China	Asia	2005
H3g1.4	GQ422432	swine/Guangdong/107/2002	Swine	H3	N2	China	Asia	2002
H3g1.4	GQ422433	swine/Guangdong/110/2002	Swine	H3	N2	China	Asia	2002
H3g1.4	GQ422434	swine/Guangdong/113/2002	Swine	H3	N2	China	Asia	2002
H3g1.4	GQ422437	swine/Guangdong/102/1998	Swine	H3	N2	China	Asia	1998
H3g1.4	GQ422435	swine/Guangdong/106/2002	Swine	H3	N2	China	Asia	2002
H3g1.4	GQ422436	swine/Guangdong/111/2002	Swine	H3	N2	China	Asia	2002
H3g1.4	CY003496	HongKong/14/74	Human	H3	N2	HongKong	Asia	1974
H3g1.4	AJ311454	Swine/Taiwan/7310/70	Swine	H3	N2	Taiwan	Asia	1970
H3g1.4	CY006763	Nanjing/49/77	Human	H3	N2	China	Asia	1977
H3g1.4	CY006907	HongKong/49/74	Human	H3	N2	HongKong	Asia	1974
H3g1.4	CY009004	HongKong/33/73	Human	H3	N2	HongKong	Asia	1973
H3g1.4	CY034036	HongKong/1-12-MA21-3/1968	Human	H3	N2	HongKong	Asia	1968
H3g1.4	CY033569	HongKong/1-12-MA21-2/1968	Human	H3	N2	HongKong	Asia	1968
H3g1.4	CY033561	HongKong/1-12-MA21-1/1968	Human	H3	N2	HongKong	Asia	1968
H3g1.4	CY033545	HongKong/1-11-MA21-2/1968	Human	H3	N2	HongKong	Asia	1968
H3g1.4	CY033537	HongKong/1-11-MA21-1/1968	Human	H3	N2	HongKong	Asia	1968
H3g1.4	CY033988	HongKong/1-1-MA-12D/1968	Human	H3	N2	HongKong	Asia	1968
H3g1.4	CY033505	HongKong/1-1-MA-12/1968	Human	H3	N2	HongKong	Asia	1968
H3g1.4	J02090	Aichi/2/1968	Human	H3	N2	Japan	Asia	1968
H3g1.4	V01085	Aichi/2/68	Human	N0	N2	Japan	Asia	1968
H3g1.4	CY044261	HongKong/1/1968	Human	H3	N2	HongKong	Asia	1968
H3g1.4	CY033041	HongKong/1-7/1968	Human	H3	N2	HongKong	Asia	1968
H3g1.4	CY033033	HongKong/1-6/1968	Human	H3	N2	HongKong	Asia	1968
H3g1.4	CY033025	HongKong/1-5/1968	Human	H3	N2	HongKong	Asia	1968
H3g1.4	CY033009	HongKong/1-2/1968	Human	H3	N2	HongKong	Asia	1968
H3g1.4	CY033996	HongKong/1-8/1968	Human	H3	N2	HongKong	Asia	1968
H3g1.4	EF614251	Aichi/2/1968	Human	H3	N2	Japan	Asia	1968
H3g1.4	EF614250	Aichi/2/1968	Human	H3	N2	Japan	Asia	1968
H3g1.4	EF614249	Aichi/2/1968	Human	H3	N2	Japan	Asia	1968
H3g1.4	CY034004	HongKong/1-11/1968	Human	H3	N2	HongKong	Asia	1968
H3g1.4	CY033065	HongKong/1-12/1968	Human	H3	N2	HongKong	Asia	1968
H3g1.4	CY033057	HongKong/1-10/1968	Human	H3	N2	HongKong	Asia	1968
H3g1.4	CY033001	HongKong/1-1/1968	Human	H3	N2	HongKong	Asia	1968
H3g1.4	CY008156	Beijing/1/68	Human	H3	N2	China	Asia	1968
H3g1.4	CY033049	HongKong/1-9/1968	Human	H3	N2	HongKong	Asia	1968
H3g1.4	CY033017	HongKong/1-4/1968	Human	H3	N2	HongKong	Asia	1968
H3g1.4	AB295605	Aichi/2/1968	Human	H3	N2	Japan	Asia	1968
H3g1.4	AB284320	Aichi/2/1968	Human	H3	N2	Japan	Asia	1968
H3g1.4	AF348176	HongKong/1/68	Human	H3	N2	HongKong	Asia	1968
H3g1.4	CY003528	HongKong/11/73	Human	H3	N2	HongKong	Asia	1973
H3g1.4	CY007971	Guandong/243/72	Human	H3	N2	China	Asia	1972
H3g1.4	CY033513	HongKong/1-9-MA21-1/1968	Human	H3	N2	HongKong	Asia	1968
H3g1.4	CY033521	HongKong/1-9-MA21-2/1968	Human	H3	N2	HongKong	Asia	1968
H3g1.4	CY033529	HongKong/1-9-MA21-3/1968	Human	H3	N2	HongKong	Asia	1968
H3g1.4	CY006299	HongKong/3/69	Human	H3	N2	HongKong	Asia	1969
H3g1.4	CY033553	HongKong/1-11-MA21-3/1968	Human	H3	N2	HongKong	Asia	1968
H3g1.4	CY044269	HongKong/1-1-MA-20/1968	Human	H3	N2	HongKong	Asia	1968
H3g1.4	CY044277	HongKong/1-5-MA21-3/1968	Human	H3	N2	HongKong	Asia	1968
H3g1.4	CY044285	HongKong/1-6-MA21-1/1968	Human	H3	N2	HongKong	Asia	1968
H3g1.4	CY044293	HongKong/1-10-MA21-3/1968	Human	H3	N2	HongKong	Asia	1968
H3g1.4	EF409245	HongKong/68	Human	H3	N2	HongKong	Asia	1968
H3g1.4	M55059	Aichi/2/1968	Human	H3	N2	Japan	Asia	1968
H3g1.4	CY034012	HongKong/1-6-MA21-2/1968	Human	H3	N2	HongKong	Asia	1968
H3g1.4	CY034020	HongKong/1-8-MA21-1/1968	Human	H3	N2	HongKong	Asia	1968
H3g1.4	CY034028	HongKong/1-8-MA21-3/1968	Human	H3	N2	HongKong	Asia	1968
H3g1.4	EF614248	Aichi/2/1968	Human	H3	N2	Japan	Asia	1968
H3g1.4	D21183	swine/Wadayama/5/69	Swine	H3	N2	Japan	Asia	1969
H3g1.4	D21174	swine/HongKong/1/76	Swine	H3	N2	HongKong	Asia	1976
H3g1.4	EF626622	Tokyo/1/1975	Human	H3	N2	Japan	Asia	1975
H3g1.4	EF409247	swine/Leipzig/145/92	Swine	H3	N2	Germany	Europe	1992
H3g1.4	DQ975252	swine/Italy/1850/1977	Swine	H3	N2	Italy	Europe	1977
H3g1.4	AY661013	Rotterdam/8179/77	Human	H3	N2	Netherlands	Europe	1977
H3g1.4	AY661012	Rotterdam/5828/77	Human	H3	N2	Netherlands	Europe	1977
H3g1.4	AY661011	Bilthoven/3895/77	Human	H3	N2	Netherlands	Europe	1977
H3g1.4	AY661009	Bilthoven/5657/76	Human	H3	N2	Netherlands	Europe	1976
H3g1.4	AY661008	Bilthoven/5029/76	Human	H3	N2	Netherlands	Europe	1976
H3g1.4	AY661006	Bilthoven/1761/76	Human	H3	N2	Netherlands	Europe	1976
H3g1.4	AY661010	Bilthoven/6545/76	Human	H3	N2	Netherlands	Europe	1976
H3g1.4	AY661045	Amsterdam/1609/77	Human	H3	N2	Netherlands	Europe	1977
H3g1.4	EF626614	England/864/1975	Human	H3	N2	UnitedKingdom	Europe	1975
H3g1.4	AY661007	Bilthoven/2271/76	Human	H3	N2	Netherlands	Europe	1976
H3g1.4	AY661044	Bilthoven/628/76	Human	H3	N2	Netherlands	Europe	1976
H3g1.4	AY660996	Bilthoven/6449/71	Human	H3	N2	Netherlands	Europe	1971
H3g1.4	AY661040	Bilthoven/808/69	Human	H3	N2	Netherlands	Europe	1969
H3g1.4	AY660994	Bilthoven/93/70	Human	H3	N2	Netherlands	Europe	1970
H3g1.4	AY661038	Bilthoven/15793/68	Human	H3	N2	Netherlands	Europe	1968
H3g1.4	AY660995	Bilthoven/2668/70	Human	H3	N2	Netherlands	Europe	1970
H3g1.4	K03335	England/878/1969	Human	H3	N2	UnitedKingdom	Europe	1969
H3g1.4	AY661039	Bilthoven/16190/68	Human	H3	N2	Netherlands	Europe	1968
H3g1.4	AY660991	Bilthoven/16398/68	Human	H3	N2	Netherlands	Europe	1968
H3g1.4	AY660993	Bilthoven/17938/69	Human	H3	N2	Netherlands	Europe	1969
H3g1.4	AY660992	Bilthoven/908/69	Human	H3	N2	Netherlands	Europe	1969
H3g1.4	AY660999	Bilthoven/6022/72	Human	H3	N2	Netherlands	Europe	1972
H3g1.4	AY660997	Bilthoven/21438/71	Human	H3	N2	Netherlands	Europe	1971
H3g1.4	AY660998	Bilthoven/21801/71	Human	H3	N2	Netherlands	Europe	1971
H3g1.4	AY661043	Bilthoven/2600/75	Human	H3	N2	Netherlands	Europe	1975
H3g1.4	AY661027	Bilthoven/7398/74	Human	H3	N2	Netherlands	Europe	1974
H3g1.4	AY661028	Bilthoven/2813/75	Human	H3	N2	Netherlands	Europe	1975
H3g1.4	AY661005	Bilthoven/9459/74	Human	H3	N2	Netherlands	Europe	1974
H3g1.4	AY661017	Bilthoven/5931/74	Human	H3	N2	Netherlands	Europe	1974
H3g1.4	AY661042	Bilthoven/5930/74	Human	H3	N2	Netherlands	Europe	1974
H3g1.4	AF201875	England/42/72	Human	H3	N2	UnitedKingdom	Europe	1972
H3g1.4	AY661018	Bilthoven/5146/74	Human	H3	N2	Netherlands	Europe	1974
H3g1.4	CY009356	England/72	Human	H3	N2	UnitedKingdom	Europe	1972
H3g1.4	EF626613	England/42/1972	Human	H3	N2	UnitedKingdom	Europe	1972
H3g1.4	M54895	Udorn/307/1972	Human	H3	N2	Russia	Europe	1972
H3g1.4	AY661003	Bilthoven/748/73	Human	H3	N2	Netherlands	Europe	1973
H3g1.4	AY661004	Bilthoven/3517/73	Human	H3	N2	Netherlands	Europe	1973
H3g1.4	AX350190	Noname	Human	H3	N2	Russia	Europe	1972
H3g1.4	AY661000	Bilthoven/23290/72	Human	H3	N2	Netherlands	Europe	1972
H3g1.4	AX350204	Noname	Human	H3	N2	Russia	Europe	1972
H3g1.4	CY009636	Udorn/72	Human	H3	N2	Russia	Europe	1972
H3g1.4	DQ508929	Udorn/307/1972	Human	H3	N2	Russia	Europe	1972
H3g1.4	AY661002	Bilthoven/552/73	Human	H3	N2	Netherlands	Europe	1973
H3g1.4	AY661001	Bilthoven/23337/72	Human	H3	N2	Netherlands	Europe	1972
H3g1.4	AY661041	Bilthoven/21793/72	Human	H3	N2	Netherlands	Europe	1972
H3g1.4	AJ252132	swine/Potsdam/35/82	Swine	H3	N2	Germany	Europe	1982
H3g1.4	DQ975253	swine/Italy/6/1981	Swine	H3	N2	Italy	Europe	1981
H3g1.4	EF626616	MayoClinic/1/1975	Human	H3	N2	USA	NorthAmerica	1975
H3g1.4	CY006219	Memphis/2/71	Human	H3	N2	USA	NorthAmerica	1971
H3g1.4	J02132	Memphis/1/1971	Human	H3	N2	USA	NorthAmerica	1971
H3g1.4	AB298687	Memphis/1/71	Human	H3	N2	USA	NorthAmerica	1971
H3g1.4	CY002496	Memphis/1/71	Human	H3	N2	USA	NorthAmerica	1971
H3g1.4	CY021597	Memphis/3/1971	Human	H3	N2	USA	NorthAmerica	1971
H3g1.4	CY022946	Albany/3/1970	Human	H3	N2	USA	NorthAmerica	1970
H3g1.4	CY021117	Albany/6/1970	Human	H3	N2	USA	NorthAmerica	1970
H3g1.4	CY022938	Albany/1/1970	Human	H3	N2	USA	NorthAmerica	1970
H3g1.4	CY021085	Albany/2/1970	Human	H3	N2	USA	NorthAmerica	1970
H3g1.4	CY020525	Albany/18/1968	Human	H3	N2	USA	NorthAmerica	1968
H3g1.4	CY021845	Albany/10/1968	Human	H3	N2	USA	NorthAmerica	1968
H3g1.4	CY019891	Albany/11/1968	Human	H3	N2	USA	NorthAmerica	1968
H3g1.4	CY022085	Albany/6/1968	Human	H3	N2	USA	NorthAmerica	1968
H3g1.4	CY021109	Albany/17/1968	Human	H3	N2	USA	NorthAmerica	1968
H3g1.4	CY019907	Albany/19/1968	Human	H3	N2	USA	NorthAmerica	1968
H3g1.4	CY019915	Albany/3/1969	Human	H3	N2	USA	NorthAmerica	1969
H3g1.4	CY021837	Albany/4/1969	Human	H3	N2	USA	NorthAmerica	1969
H3g1.4	CY019899	Albany/1/1969	Human	H3	N2	USA	NorthAmerica	1969
H3g1.4	CY006211	Memphis/1/68	Human	H3	N2	USA	NorthAmerica	1968
H3g1.4	CY021941	Albany/1/1976	Human	H3	N2	USA	NorthAmerica	1976
H3g1.4	CY021829	Albany/15/1976	Human	H3	N2	USA	NorthAmerica	1976
H3g1.4	CY021101	Albany/4/1977	Human	H3	N2	USA	NorthAmerica	1977
H3g1.4	CY006723	Memphis/137/76	Human	H3	N2	USA	NorthAmerica	1976
H3g1.4	CY006835	Memphis/110/76	Human	H3	N2	USA	NorthAmerica	1976
H3g1.4	CY006883	Memphis/103/76	Human	H3	N2	USA	NorthAmerica	1976
H3g1.4	CY022309	Memphis/104/1976	Human	H3	N2	USA	NorthAmerica	1976
H3g1.4	CY008692	Memphis/106/76	Human	H3	N2	USA	NorthAmerica	1976
H3g1.4	CY008700	Memphis/108/76	Human	H3	N2	USA	NorthAmerica	1976
H3g1.4	CY009060	Memphis/105/76	Human	H3	N2	USA	NorthAmerica	1976
H3g1.4	M73774	swine/Colorado/1/1977	Swine	H3	N2	USA	NorthAmerica	1977
H3g1.4	U07146	swine/Ange-Gardien/150/1990	Swine	H3	N2	Canada	NorthAmerica	1990
H3g1.4	CY009300	Swine/Colorado/1/77	Swine	H3	N2	USA	NorthAmerica	1977
H3g1.4	CY021077	Albany/42/1975	Human	H3	N2	USA	NorthAmerica	1975
H3g1.4	CY006715	Memphis/101/74	Human	H3	N2	USA	NorthAmerica	1974
H3g1.4	CY006819	Memphis/102/74	Human	H3	N2	USA	NorthAmerica	1974
H3g1.4	CY006827	Memphis/103/74	Human	H3	N2	USA	NorthAmerica	1974
H3g1.4	CY021093	Albany/20/1974	Human	H3	N2	USA	NorthAmerica	1974
H3g1.4	CY008460	Memphis/103/72	Human	H3	N2	USA	NorthAmerica	1972
H3g1.4	CY008684	Memphis/105/72	Human	H3	N2	USA	NorthAmerica	1972
H3g1.4	CY002744	Memphis/109/72	Human	H3	N2	USA	NorthAmerica	1972
H3g1.4	CY006811	Memphis/3/73	Human	H3	N2	USA	NorthAmerica	1973
H3g1.4	V01089	Memphis/102/72	Human	H3	N2	USA	NorthAmerica	1972
H3g1.4	EF626617	Memphis/102/1972	Human	H3	N2	USA	NorthAmerica	1972
H3g1.4	CY002096	Memphis/102/72	Human	H3	N2	USA	NorthAmerica	1972
H3g1.4	CY008676	Memphis/101/72	Human	H3	N2	USA	NorthAmerica	1972
H3g1.4	K03338	Qu/7/1970	Human	H3	N2	Australia	Oceania	1970
H3g1.4	CY011120	NorthernTerritory/60/1968	Human	H3	N2	Australia	Oceania	1968
H3g1.4	V01103	NT/60/68/29C	Human	H3	N2	Australia	Oceania	1968
H3g1.4	EF626609	Victoria/3/1975	Human	H3	N2	Australia	Oceania	1975
H3g1.4	CY015508	Victoria/1968	Human	H3	N2	Australia	Oceania	1968
H3g1.4	V01086	Victoria/3/1975	Human	H3	N2	Australia	Oceania	1975
H3g1.4	V01098	Victoria/3/75	Human	H3	N2	Australia	Oceania	1975
H3g1.4	AF201842	Dunedin/4/73)hemagglutinin	Human	H3	N2	NewZealand	Oceania	1973
H3g1.4	EF626618	PortChalmers/1/1973	Human	H3	N2	NewZealand	Oceania	1973
H3g1.4	AF092062	PortChalmers/1/73)hemagglutinin	Human	H3	N2	NewZealand	Oceania	1973
H3g1.4	CY009348	PortChalmers/73	Human	H3	N2	NewZealand	Oceania	1973
H3g1.5	EU296621	swine/Chonburi/05CB2/2005	Swine	H3	N2	Thailand	Asia	2005
H3g1.5	FJ688268	swine/Thailand/S1/2005	Swine	H3	N2	Thailand	Asia	2005
H3g1.5	EU296615	swine/Nakhonpathom/NIAH586-2/2005	Swine	H3	N2	Thailand	Asia	2005
H3g1.5	EU296613	swine/Nakhonpathom/NIAH586-1/2005	Swine	H3	N2	Thailand	Asia	2005
H3g1.5	AB434360	swine/Nakhonpathom/NIAH586-1/2005	Swine	H3	N2	Thailand	Asia	2005
H3g1.5	EU296611	swine/Chachoengsao/NIAH586/2005	Swine	H3	N2	Thailand	Asia	2005
H3g1.6.1	AJ293933	Swine/Coted'Armor/3633/84	Swine	H3	N2	France	Europe	1984
H3g1.6.2	AB434352	swine/UdonThani/NIAH464/2004	Swine	H3	N2	Thailand	Asia	2004
H3g1.6.2	AB434344	swine/Chachoengsao/2003	Swine	H3	N2	Thailand	Asia	2003
H3g1.6.2	EU296609	swine/Chachoengsao/NIAH-Nongwa/2003	Swine	H3	N2	Thailand	Asia	2003
H3g1.6.2	DQ975256	swine/Italy/729/1988	Swine	H3	N2	Italy	Europe	1988
H3g1.6.2	AJ293928	swine/Italy/636/87	Swine	H3	N2	Italy	Europe	1987
H3g1.6.2	DQ975255	swine/Italy/630/1987	Swine	H3	N2	Italy	Europe	1987
H3g1.6.2	DQ975261	swine/Italy/1453/1996	Swine	H3	N2	Italy	Europe	1996
H3g1.6.2	X73489	swine/Italy/309/83	Swine	H3	N2	Italy	Europe	1983
H3g1.6.2	X73490	swine/Italy/520/85	Swine	H3	N2	Italy	Europe	1985
H3g1.6.2	X73491	swine/Italy/635/87	Swine	H3	N2	Italy	Europe	1987
H3g1.6.2	M73775	swine/Ukkel/1/1984	Swine	H3	N2	Belgium	Europe	1984
H3g1.6.2	AF092058	Swine/Utrecht/4/85)hemagglutinin	Swine	H3	N2	Netherlands	Europe	1985
H3g1.6.2	AF092059	Swine/Brabant/84)hemagglutinin	Swine	H3	N2	Netherlands	Europe	1984
H3g1.6.3	AY363525	swine/HongKong/1144/02	Swine	H3	N2	HongKong	Asia	2002
H3g1.6.3	AY363524	swine/HongKong/9745/01	Swine	H3	N2	HongKong	Asia	2001
H3g1.6.3	AY363526	swine/HongKong/1197/02	Swine	H3	N2	HongKong	Asia	2002
H3g1.6.3	AY363522	swine/HongKong/7982/00	Swine	H3	N2	HongKong	Asia	2000
H3g1.6.3	AY363523	swine/HongKong/9296/01	Swine	H3	N2	HongKong	Asia	2001
H3g1.6.3	AJ293926	HongKong/1774/99	Human	H3	N2	HongKong	Asia	1999
H3g1.6.3	AY363520	swine/HongKong/5200/99	Swine	H3	N2	HongKong	Asia	1999
H3g1.6.3	AY363521	swine/HongKong/5212/99	Swine	H3	N2	HongKong	Asia	1999
H3g1.6.3	EU924271	swine/Nordkirchen/IDT1993/2003	Swine	H3	N2	Germany	Europe	2003
H3g1.6.3	AM920742	swine/Germany/S043/2002	Swine	H3	N2	Germany	Europe	2002
H3g1.6.3	CY009380	swine/Spain/39139/2002	Swine	H3	N2	Spain	Europe	2002
H3g1.6.3	GQ161149	swine/Melle/IDT5706/2006	Swine	H3	N2	Germany	Europe	2006
H3g1.6.3	GQ161151	swine/Bondelum/IDT5959/2007	Swine	H3	N2	Germany	Europe	2007
H3g1.6.3	FJ798772	swine/Hungary/13509/2007	Swine	H3	N2	Hungary	Europe	2007
H3g1.6.3	EU982296	swine/Italy/50127/2007	Swine	H3	N2	Italy	Europe	2007
H3g1.6.3	EU982295	swine/Italy/10659-1/2007	Swine	H3	N2	Italy	Europe	2007
H3g1.6.3	EU982297	swine/Italy/65260-11/2006	Swine	H3	N2	Italy	Europe	2006
H3g1.6.3	GQ161147	swine/Damme/IDT5673/2006	Swine	H3	N2	Germany	Europe	2006
H3g1.6.3	EU982298	swine/Italy/268086/2003	Swine	H3	N2	Italy	Europe	2003
H3g1.6.3	CY010564	swine/Spain/54008/2004	Swine	H3	N2	Spain	Europe	2004
H3g1.6.3	CY020501	swine/Spain/42386/2002	Swine	H3	N2	Spain	Europe	2002
H3g1.6.3	GQ161170	swine/Bissendorf/IDT1864/2003	Swine	H3	N2	Germany	Europe	2003
H3g1.6.3	GQ161129	swine/Bakum/IDT1769/2003	Swine	H3	N2	Germany	Europe	2003
H3g1.6.3	GQ161136	swine/Bakum/IDT1769/2003	Swine	H3	N2	Germany	Europe	2003
H3g1.6.3	DQ975263	swine/Italy/170/2001	Swine	H3	N2	Italy	Europe	2001
H3g1.6.3	DQ975264	swine/Italy/11338/2000	Swine	H3	N2	Italy	Europe	2000
H3g1.6.3	EU045365	swine/Italy/7680/2001	Swine	H3	N2	Italy	Europe	2001
H3g1.6.3	EU037014	swine/Italy/66945/2006	Swine	H3	N1	Italy	Europe	2006
H3g1.6.3	EU045371	swine/Italy/297576/2004	Swine	H3	N2	Italy	Europe	2004
H3g1.6.3	EU982299	swine/Italy/302219-3/2004	Swine	H3	N2	Italy	Europe	2004
H3g1.6.3	CY009372	swine/Spain/33601/2001	Swine	H3	N2	Spain	Europe	2001
H3g1.6.3	AJ293931	swine/Italy/1477/96	Swine	H3	N2	Italy	Europe	1996
H3g1.6.3	AJ293929	swine/Italy/1243/92	Swine	H3	N2	Italy	Europe	1992
H3g1.6.3	DQ975260	swine/Italy/1380-2/1995	Swine	H3	N2	Italy	Europe	1995
H3g1.6.3	AF092060	Netherlands/5/93)hemagglutinin	Human	H3	N2	Netherlands	Europe	1993
H3g1.6.3	AJ311511	swine/Finistere/510/94	Swine	H3	N2	France	Europe	1994
H3g1.6.3	DQ975267	swine/Italy/5253-4/2001	Swine	H3	N2	Italy	Europe	2001
H3g1.6.3	DQ975265	swine/Italy/1962-1/2000	Swine	H3	N2	Italy	Europe	2000
H3g1.6.3	DQ975266	swine/Italy/9181/2000	Swine	H3	N2	Italy	Europe	2000
H3g1.6.3	AJ293932	swine/Italy/1510/98	Swine	H3	N2	Italy	Europe	1998
H3g1.6.3	DQ975262	swine/Italy/1619-2/1999	Swine	H3	N2	Italy	Europe	1999
H3g1.6.3	EF409250	swine/Bakum/8602/99	Swine	H3	N2	Germany	Europe	1999
H3g1.6.3	AF092054	Swine/Netherlands/849/93)hemagglutinin	Swine	H3	N2	Netherlands	Europe	1993
H3g1.6.3	EU045362	swine/Italy/600/1999	Swine	H3	N2	Italy	Europe	1999
H3g1.6.3	AF092052	Swine/Breugel/97)hemagglutinin	Swine	H3	N2	Netherlands	Europe	1997
H3g1.6.3	EF409248	swine/Jena/5/96	Swine	H3	N2	Germany	Europe	1996
H3g1.6.3	EF118172	swine/Jena/5/1996	Swine	H3	N2	Germany	Europe	1996
H3g1.6.3	EF118173	swine/Jena/2/1996	Swine	H3	N2	Germany	Europe	1996
H3g1.6.3	AM920733	swine/Germany/SEC27/97	Swine	H3	N2	Germany	Europe	1997
H3g1.6.3	AF092053	Swine/Oedenrode/7C/96)hemagglutinin	Swine	H3	N2	Netherlands	Europe	1996
H3g1.6.3	AM920723	swine/Germany/Vi3161/95	Swine	H3	N2	Germany	Europe	1995
H3g1.6.3	AF092055	Swine/Belgium/231/94)hemagglutinin	Swine	H3	N2	Belgium	Europe	1994
H3g1.6.3	AJ293927	swine/Belgium/87/95	Swine	H3	N2	Belgium	Europe	1995
H3g1.6.3	EF409249	swine/Lohne/1/97	Swine	H3	N2	Germany	Europe	1997
H3g1.6.3	AJ252130	swine/Bakum/909/93	Swine	H3	N0	Germany	Europe	1993
H3g1.6.3	AM746616	wildboar/Germany/WS169/2006	Swine	H3	N2	Germany	Europe	2006
H3g1.6.3	AF092056	Swine/Netherlands/L2/93)hemagglutinin	Swine	H3	N2	Netherlands	Europe	1993
H3g1.6.3	AF092061	Netherlands/35/93)hemagglutinin	Human	H3	N2	Netherlands	Europe	1993
H3g1.6.3	DQ975257	swine/Italy/1184/1992	Swine	H3	N2	Italy	Europe	1992
H3g1.6.3	DQ975258	swine/Italy/1188/1992	Swine	H3	N2	Italy	Europe	1992
H3g1.6.3	DQ975259	swine/Italy/1367-2/1994	Swine	H3	N2	Italy	Europe	1994
H3g1.6.3	AF092057	Swine/Netherlands/784/91)hemagglutinin	Swine	H3	N2	Netherlands	Europe	1991
H3g1.6.3	AJ293930	swine/Italy/1461/96	Swine	H3	N2	Italy	Europe	1996
H3g1.7	X05907	England/321/1977	Human	H3	N2	UnitedKingdom	Europe	1977
H3g1.7	CY020221	Albany/14/1978	Human	H3	N2	USA	NorthAmerica	1978
H3g1.7	AF450246	Texas/1/77	Human	H3	N2	USA	NorthAmerica	1977
H3g1.7	EF626623	Texas/1/1977	Human	H3	N2	USA	NorthAmerica	1977
H3g1.7	CY007611	Memphis/19/78	Human	H3	N2	USA	NorthAmerica	1978
H3g1.7	CY006731	Memphis/1/77	Human	H3	N2	USA	NorthAmerica	1977
H3g1.7	CY006739	Memphis/3/77	Human	H3	N2	USA	NorthAmerica	1977
H3g1.7	CY006843	Memphis/5/77	Human	H3	N2	USA	NorthAmerica	1977
H3g1.7	CY008115	Memphis/2/77	Human	H3	N2	USA	NorthAmerica	1977
H3g1.7	CY008123	Memphis/4/77	Human	H3	N2	USA	NorthAmerica	1977
H3g1.7	CY006699	Memphis/12/78	Human	H3	N2	USA	NorthAmerica	1978
H3g1.7	CY006707	Memphis/18/78	Human	H3	N2	USA	NorthAmerica	1978
H3g1.7	CY020325	Memphis/16/1978	Human	H3	N2	USA	NorthAmerica	1978
H3g1.7	CY009308	Swine/Wisconsin/194/80	Swine	H3	N2	USA	NorthAmerica	1980
H3g1.7	CY006691	Memphis/2/78	Human	H3	N2	USA	NorthAmerica	1978
H3g1.8	DQ447186	swine/Taiwan/0408/2004	Swine	H3	N1	Taiwan	Asia	2004
H3g1.8	AY377927	swine/Pingtung/199-2/2002	Swine	H3	N2	Taiwan	Asia	2002
H3g1.9	AF008862	Guizhou/3/	Human	H3	N2	China	Asia	1987
H3g1.9	CY006043	HongKong/45/80	Human	H3	N2	HongKong	Asia	1980
H3g1.9	CY003488	HongKong/46/80	Human	H3	N2	HongKong	Asia	1980
H3g1.9	CY006851	Nanjing/36/83	Human	H3	N2	China	Asia	1983
H3g1.9	CY006052	HongKong/1/82	Human	H3	N2	HongKong	Asia	1982
H3g1.9	CY006755	Nanjing/2/82	Human	H3	N2	China	Asia	1982
H3g1.9	CY006203	Nanjing/13/80	Human	H3	N2	China	Asia	1980
H3g1.9	AF201843	BANGKOK/1/79)hemagglutinin	Human	H3	N2	Thailand	Asia	1979
H3g1.9	U08858	Philippines/2/82	Human	H3	N2	Philippines	Asia	1982
H3g1.9	U08859	Philippines/2/82/BS	Human	H3	N2	Philippines	Asia	1982
H3g1.9	AF233691	Philippines/2/82	Human	H3	N2	Philippines	Asia	1982
H3g1.9	DQ508825	Bangkok/01/1979	Human	H3	N2	Thailand	Asia	1979
H3g1.9	J02092	Bangkok/1/1979	Human	H3	N2	Thailand	Asia	1979
H3g1.9	AF008908	Cheng-mei/4/85	Human	H3	N2	China	Asia	1985
H3g1.9	EF626619	Phillipines/2/1982	Human	H3	N2	Philippines	Asia	1982
H3g1.9	L19002	Philippines/2/1982	Human	H3	N2	Philippines	Asia	1982
H3g1.9	EF626610	Bangkok/1/1979	Human	H3	N2	Thailand	Asia	1979
H3g1.9	EF626611	Bangkok/2/1979	Human	H3	N2	Thailand	Asia	1979
H3g1.9	AY661046	Rotterdam/577/80	Human	H3	N2	Netherlands	Europe	1980
H3g1.9	DQ975254	swine/Italy/7/1981	Swine	H3	N2	Italy	Europe	1981
H3g1.9	AF201844	Belgium/2/81)hemagglutinin	Human	H3	N2	Belgium	Europe	1981
H3g1.9	AY661014	Bilthoven/4791/81	Human	H3	N2	Netherlands	Europe	1981
H3g1.9	AY661047	Netherlands/209/80	Human	H3	N2	Netherlands	Europe	1980
H3g1.9	AY661015	Bilthoven/10684/82	Human	H3	N2	Netherlands	Europe	1982
H3g1.9	AY661016	Oslo/13676/83	Human	H3	N2	Norway	Europe	1983
H3g1.9	AF201845	Praha/2/83	Human	H3	N2	CzechRepublic	Europe	1983
H3g1.9	U77830	ChristHospital/231/82	Human	H3	N2	UnitedKingdom	Europe	1982
H3g1.9	AY661025	Netherlands/233/82	Human	H3	N2	Netherlands	Europe	1982
H3g1.9	AY661048	Netherlands/241/82	Human	H3	N2	Netherlands	Europe	1982
H3g1.9	AF008861	Baylor6A/Texas/12835/83	Human	H3	N2	USA	NorthAmerica	1983
H3g1.9	AF405207	Baylor1B/83	Human	H3	N2	USA	NorthAmerica	1983
H3g1.9	AF405210	Baylor4A/83	Human	H3	N2	USA	NorthAmerica	1983
H3g1.9	AF405209	Baylor3A/83	Human	H3	N2	USA	NorthAmerica	1983
H3g1.9	AF405211	Baylor5B/85	Human	H3	N2	USA	NorthAmerica	1985
H3g1.9	AF405206	Baylor1A/81	Human	H3	N2	USA	NorthAmerica	1981
H3g1.9	AF405212	Oregon/4/80	Human	H3	N2	USA	NorthAmerica	1980
H3g1.9	AF405208	Baylor2A/81	Human	H3	N2	USA	NorthAmerica	1981
H3g1.9	CY006891	Memphis/9/80	Human	H3	N2	USA	NorthAmerica	1980
H3g1.9	CY007627	Memphis/1/81	Human	H3	N2	USA	NorthAmerica	1981
H3g1.9	CY008660	Memphis/1/80	Human	H3	N2	USA	NorthAmerica	1980
H3g1.9	CY008468	Memphis/3/80	Human	H3	N2	USA	NorthAmerica	1980
H3g1.9	CY007619	Memphis/4/80	Human	H3	N2	USA	NorthAmerica	1980
H3g1.10	CY008172	Nanjing/28/84	Human	H3	N2	China	Asia	1984
H3g1.10	CY003536	HongKong/7/85	Human	H3	N2	HongKong	Asia	1985
H3g1.10	CY003744	HongKong/7/84	Human	H3	N2	HongKong	Asia	1984
H3g1.10	CY003504	HongKong/6/85	Human	H3	N2	HongKong	Asia	1985
H3g1.10	CY006323	HongKong/4/84	Human	H3	N2	HongKong	Asia	1984
H3g1.10	CY006315	HongKong/14/83	Human	H3	N2	HongKong	Asia	1983
H3g1.10	CY003736	HongKong/5/83	Human	H3	N2	HongKong	Asia	1983
H3g1.10	CY003720	HongKong/26/83	Human	H3	N2	HongKong	Asia	1983
H3g1.10	CY003512	HongKong/2/88	Human	H3	N2	HongKong	Asia	1988
H3g1.10	AF008887	Qingdao/10/	Human	H3	N2	China	Asia	1987
H3g1.10	CY003544	HongKong/7/87	Human	H3	N2	HongKong	Asia	1987
H3g1.10	AB517989	swine/Obihiro/10/1985	Swine	H3	N2	Japan	Asia	1985
H3g1.10	CY003520	HongKong/24/85	Human	H3	N2	HongKong	Asia	1985
H3g1.10	L19412	Shanghai/11/1987/highyield	Human	H3	N2	China	Asia	1987
H3g1.10	AF008886	Shanghai/11/	Human	H3	N2	China	Asia	1987
H3g1.10	AF386604	Seoul/11/88	Human	H3	N2	SouthKorea	Asia	1988
H3g1.10	L19416	Shanghai/11/1987/X99aEhighyieldreassortant	Human	H3	N2	China	Asia	1987
H3g1.10	L19414	Shanghai/11/1987/X99/highyieldingreassortant	Human	H3	N2	China	Asia	1987
H3g1.10	L19415	Shanghai/11/1987/X99a/highyieldreassortant	Human	H3	N2	China	Asia	1987
H3g1.10	AF008889	Guizhou/1/	Human	H3	N2	China	Asia	1987
H3g1.10	L19413	Shanghai/11/1987/lowyield	Human	H3	N2	China	Asia	1987
H3g1.10	D43790	sw/Obihiro/1/1993	Swine	H3	N2	Japan	Asia	1993
H3g1.10	AF008899	Bangkok/	Human	H3	N2	Thailand	Asia	1985
H3g1.10	AF008900	Gumma/346/	Human	H3	N2	Japan	Asia	1985
H3g1.10	AF008902	Yamagata/96/85	Human	H3	N2	Japan	Asia	1985
H3g1.10	AF008901	Bangkok/25/	Human	H3	N2	Thailand	Asia	1985
H3g1.10	AF008877	Yamaneshi/497/	Human	H3	N2	Japan	Asia	1985
H3g1.10	AF008904	Yokohama/C5/85	Human	H3	N2	Japan	Asia	1985
H3g1.10	D43791	sw/Obihiro/2/1993	Swine	H3	N2	Japan	Asia	1993
H3g1.10	AF008876	Fukuoka/C29/	Human	H3	N2	Japan	Asia	1985
H3g1.10	AF008884	Sichuan/2/	Human	H3	N2	China	Asia	1987
H3g1.10	AF008883	Guangdong/9/	Human	H3	N2	China	Asia	1987
H3g1.10	D21173	Sichuan/2/1987	Human	H3	N2	China	Asia	1987
H3g1.10	D10161	Sichuan/2/1987	Human	H3	N2	China	Asia	1987
H3g1.10	D49959	Sichuan/02/87	Human	H3	N2	China	Asia	1987
H3g1.10	AF008880	Chiba/38/88	Human	H3	N2	Japan	Asia	1988
H3g1.10	AF008881	Kobe/768/88	Human	H3	N2	Japan	Asia	1988
H3g1.10	AF008879	Tokyo/1276/	Human	H3	N2	Japan	Asia	1987
H3g1.10	D43787	Hokkaido/1/1988	Human	H3	N2	Japan	Asia	1988
H3g1.10	AF008868	Oita/3/83	Human	H3	N2	Japan	Asia	1983
H3g1.10	EF409246	swine/Karrenzien/2/87	Swine	H3	N2	Germany	Europe	1987
H3g1.10	EF118174	swine/Jena/3765/1989	Swine	H3	N2	Germany	Europe	1989
H3g1.10	AF008864	USSR/26/	Human	H3	N2	Russia	Europe	1985
H3g1.10	AF008865	Stockholm/4/	Human	H3	N2	Sweden	Europe	1985
H3g1.10	AY661049	Netherlands/330/85	Human	H3	N2	Netherlands	Europe	1985
H3g1.10	AY661055	England/427/88	Human	H3	N2	UnitedKingdom	Europe	1988
H3g1.10	AF008867	Caen/1/84	Human	H3	N2	France	Europe	1984
H3g1.10	AF201846	Praha/2/83	Human	H3	N2	CzechRepublic	Europe	1983
H3g1.10	AY661054	Netherlands/450/88	Human	H3	N2	Netherlands	Europe	1988
H3g1.10	AJ252129	Berlin/6/88	Human	H3	N2	Germany	Europe	1988
H3g1.10	AJ252131	Cottbus/42/88	Human	H3	N2	Germany	Europe	1988
H3g1.10	AY661056	Stockholm/12/88	Human	H3	N2	Sweden	Europe	1988
H3g1.10	CY035198	Siena/3/1988	Human	H3	N2	Italy	Europe	1988
H3g1.10	AY661051	Guildford/V728/85	Human	H3	N2	UnitedKingdom	Europe	1985
H3g1.10	DQ508849	Leningrad/360/1986	Human	H3	N2	Russia	Europe	1986
H3g1.10	AF008903	Leningrad/360/86	Human	H3	N2	Russia	Europe	1986
H3g1.10	AY661052	Stockholm/10/85	Human	H3	N2	Sweden	Europe	1985
H3g1.10	AF008897	Czechoslovakia/4/86	Human	H3	N2	CzechRepublic	Europe	1986
H3g1.10	AF008898	Stockholm/8/	Human	H3	N2	Sweden	Europe	1985
H3g1.10	AF008907	Baylor4B/Texas/39989/88	Human	H3	N2	USA	NorthAmerica	1988
H3g1.10	AY661053	Colorado/2/86	Human	H3	N2	USA	NorthAmerica	1986
H3g1.10	AF008890	Colorado/2/	Human	H3	N2	USA	NorthAmerica	1987
H3g1.10	AF008885	Los_Angeles/	Human	H3	N2	USA	NorthAmerica	1987
H3g1.10	CY008724	Memphis/5/88	Human	H3	N2	USA	NorthAmerica	1988
H3g1.10	CY008732	Memphis/15/88	Human	H3	N2	USA	NorthAmerica	1988
H3g1.10	CY010756	Memphis/8/1988	Human	H3	N2	USA	NorthAmerica	1988
H3g1.10	CY003352	Memphis/13/88	Human	H3	N2	USA	NorthAmerica	1988
H3g1.10	AF008863	Alaska/84	Human	H3	N2	USA	NorthAmerica	1984
H3g1.10	AF008875	Connecticut/4/	Human	H3	N2	USA	NorthAmerica	1985
H3g1.10	CY002088	Memphis/66/86	Human	H3	N2	USA	NorthAmerica	1986
H3g1.10	CY008716	Memphis/11/86	Human	H3	N2	USA	NorthAmerica	1986
H3g1.10	M21648	Mem/6/1986	Human	H3	N2	USA	NorthAmerica	1986
H3g1.10	AF008894	Baylor5A/Texas/12764/83	Human	H3	N2	USA	NorthAmerica	1983
H3g1.10	L19003	Mississippi/1/1985	Human	H3	N2	USA	NorthAmerica	1985
H3g1.10	CY008452	Memphis/5/85	Human	H3	N2	USA	NorthAmerica	1985
H3g1.10	AF008892	Baylor6B/Texas/25784/85	Human	H3	N2	USA	NorthAmerica	1985
H3g1.10	AF008893	Mississippi/1/	Human	H3	N2	USA	NorthAmerica	1985
H3g1.10	AF008891	Baylor3B/Texas/24753/85	Human	H3	N2	USA	NorthAmerica	1985
H3g1.10	CY009068	Memphis/2/85	Human	H3	N2	USA	NorthAmerica	1985
H3g1.10	AF008874	Texas/24752/	Human	H3	N2	USA	NorthAmerica	1985
H3g1.10	CY008708	Memphis/7/85	Human	H3	N2	USA	NorthAmerica	1985
H3g1.10	AF008872	Michigan/1/	Human	H3	N2	USA	NorthAmerica	1985
H3g1.10	AF008873	New_Jersey/4/	Human	H3	N2	USA	NorthAmerica	1985
H3g1.10	CY009052	Memphis/33/83	Human	H3	N2	USA	NorthAmerica	1983
H3g1.10	AF008871	Texas/17988/84	Human	H3	N2	USA	NorthAmerica	1984
H3g1.10	AF008869	Texas/18088/84	Human	H3	N2	USA	NorthAmerica	1984
H3g1.10	AF008870	Texas/18733/84	Human	H3	N2	USA	NorthAmerica	1984
H3g1.10	AF180666	Virginia/1/91	Human	H3	N2	USA	NorthAmerica	1991
H3g1.10	AF008866	Baylor2B/Texas/25887/83/	Human	H3	N2	USA	NorthAmerica	1985
H3g1.10	CY020333	Memphis/3/1986	Human	H3	N2	USA	NorthAmerica	1986
H3g1.10	CY011288	Memphis/5/1986	Human	H3	N2	USA	NorthAmerica	1986
H3g1.10	CY016060	Memphis/2/1986	Human	H3	N2	USA	NorthAmerica	1986
H3g1.10	CY002752	Memphis/1/86	Human	H3	N2	USA	NorthAmerica	1986
H3g1.10	CY011472	Memphis/12/1985	Human	H3	N2	USA	NorthAmerica	1985
H3g1.10	CY008668	Memphis/25/85	Human	H3	N2	USA	NorthAmerica	1985
H3g1.10	AF008905	Christ_Church/2/88	Human	H3	N2	NewZealand	Oceania	1988
H3g1.10	AY661065	Victoria/1/89	Human	H3	N2	Australia	Oceania	1989
H3g1.10	AF008882	Sydney/1/	Human	H3	N2	Australia	Oceania	1987
H3g1.10	AF008888	Victoria/7/	Human	H3	N2	Australia	Oceania	1987
H3g1.10	AF008906	Tonga/23/85	Human	H3	N2	Tonga	Oceania	1985
H3g1.10	AF092063	Wellington/4/85)hemagglutinin	Human	H3	N2	NewZealand	Oceania	1985
H3g1.10	AY661050	Wellington/4/85	Human	H3	N2	NewZealand	Oceania	1985
H3g1.10	AF008895	Christ_Church/1/	Human	H3	N2	NewZealand	Oceania	1985
H3g1.10	AF008896	Christ_Church/4/	Human	H3	N2	NewZealand	Oceania	1985
H3g1.10	AF008909	Uruguay/3/88	Human	H3	N2	Uruguay	SouthAmerica	1988
H3g1.11	D49965	Bangkok/139/90	Human	H3	N2	Thailand	Asia	1990
H3g1.11	AF008703	Taiwan/1143/91	Human	H3	N2	Taiwan	Asia	1991
H3g1.11	CY003712	HongKong/14/92	Human	H3	N2	HongKong	Asia	1992
H3g1.11	AF008698	Beijing/47/92	Human	H3	N2	China	Asia	1992
H3g1.11	AF008694	Indonesia/3946/92	Human	H3	N2	Indonesia	Asia	1992
H3g1.11	AF008695	Singapore/8/92	Human	H3	N2	Singapore	Asia	1992
H3g1.11	AF008691	Kasauli/149/92	Human	H3	N2	India	Asia	1992
H3g1.11	AF008689	India/236/93	Human	H3	N2	India	Asia	1993
H3g1.11	AF008690	India/237/93	Human	H3	N2	India	Asia	1993
H3g1.11	D49967	Shiga/2/91	Human	H3	N2	Japan	Asia	1991
H3g1.11	D43786	Beijin/352/1989	Human	H3	N2	China	Asia	1989
H3g1.11	X75800	Beijing/352/1989	Human	H3	N2	China	Asia	1989
H3g1.11	D86469	sw/Obihiro/1/1994	Swine	H3	N2	Japan	Asia	1994
H3g1.11	AF008678	Seoul/45/91	Human	H3	N2	SouthKorea	Asia	1991
H3g1.11	AB043705	Kamata/14/91	Human	H3	N2	Japan	Asia	1991
H3g1.11	AF008686	Shanghai/6/90	Human	H3	N2	China	Asia	1990
H3g1.11	AB043706	Chiba/54/92	Human	H3	N2	Japan	Asia	1992
H3g1.11	AF386610	Seoul/46/91	Human	H3	N2	SouthKorea	Asia	1991
H3g1.11	AF386609	Seoul/44/91	Human	H3	N2	SouthKorea	Asia	1991
H3g1.11	AF386611	Seoul/47/91	Human	H3	N2	SouthKorea	Asia	1991
H3g1.11	AF386612	Pusan/10/98	Human	H3	N2	SouthKorea	Asia	1998
H3g1.11	AF008682	Shiga/2/91	Human	H3	N2	Japan	Asia	1991
H3g1.11	AF386608	Seoul/23/91	Human	H3	N2	SouthKorea	Asia	1991
H3g1.11	D49961	Beijing/352/89	Human	H3	N2	China	Asia	1989
H3g1.11	U97740	Beijing/353/89	Human	H3	N2	China	Asia	1989
H3g1.11	Z46391	Beijing/353/1989	Human	H3	N2	China	Asia	1989
H3g1.11	AF008684	Beijing/353/89	Human	H3	N2	China	Asia	1989
H3g1.11	L76036	Beijing/353/1989	Human	H3	N2	China	Asia	1989
H3g1.11	AF386607	Seoul/22/90	Human	H3	N2	SouthKorea	Asia	1990
H3g1.11	AY661066	Beijing/353/89	Human	H3	N2	China	Asia	1989
H3g1.11	DQ508833	Beijing/353/1989	Human	H3	N2	China	Asia	1989
H3g1.11	AY661072	Seoul/1/90	Human	H3	N2	SouthKorea	Asia	1990
H3g1.11	AF386606	Seoul/50/91	Human	H3	N2	SouthKorea	Asia	1991
H3g1.11	AF008662	Beijing/57/89	Human	H3	N2	China	Asia	1989
H3g1.11	AF008663	Sichuan/89	Human	H3	N2	China	Asia	1989
H3g1.11	D49963	Guizhou/54/89	Human	H3	N2	China	Asia	1989
H3g1.11	D10162	Guizhou/54/89	Human	H3	N2	China	Asia	1989
H3g1.11	AF008665	Guizhou/54/89	Human	H3	N2	China	Asia	1989
H3g1.11	AF008670	Beijing/4/89	Human	H3	N2	China	Asia	1989
H3g1.11	L19000	Beijing/4/1989	Human	H3	N2	China	Asia	1989
H3g1.11	L18994	Beijing/4/1989	Human	H3	N2	China	Asia	1989
H3g1.11	L20115	Singapore/12/89originalspecimen	Human	H3	N2	Singapore	Asia	1989
H3g1.11	L18996	Guangdong/39/1989	Human	H3	N2	China	Asia	1989
H3g1.11	L18998	Guangdong/39/1989	Human	H3	N2	China	Asia	1989
H3g1.11	AF008669	Shanghai/1/89	Human	H3	N2	China	Asia	1989
H3g1.11	AF008668	Shanghai/16/89	Human	H3	N2	China	Asia	1989
H3g1.11	AF008666	Guangdong/39/89	Human	H3	N2	China	Asia	1989
H3g1.11	L19004	Guangdong/39/1989	Human	H3	N2	China	Asia	1989
H3g1.11	AF008667	Guangdong/89	Human	H3	N2	China	Asia	1989
H3g1.11	D49962	Bangkok/235/89	Human	H3	N2	Thailand	Asia	1989
H3g1.11	D49966	Bangkok/144/90	Human	H3	N2	Thailand	Asia	1990
H3g1.11	L20118	Singapore/13/89fromembryonatedegg	Human	H3	N2	Singapore	Asia	1989
H3g1.11	L20114	Singapore/12/89fromembryonatedegg	Human	H3	N2	Singapore	Asia	1989
H3g1.11	AY661060	Singapore/34/89	Human	H3	N2	Singapore	Asia	1989
H3g1.11	AY661062	Singapore/36/89	Human	H3	N2	Singapore	Asia	1989
H3g1.11	AY661064	Singapore/53/89	Human	H3	N2	Singapore	Asia	1989
H3g1.11	AY661061	Singapore/35/89	Human	H3	N2	Singapore	Asia	1989
H3g1.11	AY661063	Singapore/40/89	Human	H3	N2	Singapore	Asia	1989
H3g1.11	L20119	Singapore/13/89originalspecimen	Human	H3	N2	Singapore	Asia	1989
H3g1.11	AY661059	Hongkong/1/89	Human	H3	N2	HongKong	Asia	1989
H3g1.11	AF008660	Shanghai/24/90	Human	H3	N2	China	Asia	1990
H3g1.11	AY661074	Shanghai/24/90	Human	H3	N2	China	Asia	1990
H3g1.11	AF008661	Singapore/91	Human	H3	N2	Singapore	Asia	1991
H3g1.11	AF008659	Kasauli/206/91	Human	H3	N2	India	Asia	1991
H3g1.11	AF008658	HongKong/34/90	Human	H3	N2	HongKong	Asia	1990
H3g1.11	Z46392	Beijing/32/1992	Human	H3	N2	China	Asia	1992
H3g1.11	Z46409	HongKong/34/1990	Human	H3	N2	HongKong	Asia	1990
H3g1.11	Z46410	HongKong/23/1992	Human	H3	N2	HongKong	Asia	1992
H3g1.11	D49960	Hokkaido/20/89	Human	H3	N2	Japan	Asia	1989
H3g1.11	AF008657	Paris/1/92	Human	H3	N2	France	Europe	1992
H3g1.11	AY661125	Netherlands/938/92	Human	H3	N2	Netherlands	Europe	1992
H3g1.11	AY661110	Finland/220/92	Human	H3	N2	Finland	Europe	1992
H3g1.11	AY262744	Finland/246/92	Human	H3	N2	Finland	Europe	1992
H3g1.11	AY661119	Stockholm/20/91	Human	H3	N2	Sweden	Europe	1991
H3g1.11	L75979	Finland/211/1992	Human	H3	N2	Finland	Europe	1992
H3g1.11	AY377540	Finland/205/92	Human	H3	N2	Finland	Europe	1992
H3g1.11	AF008677	Sophia/155/93	Human	H3	N2	Bulgaria	Europe	1993
H3g1.11	CY043728	Siena/3/1991	Human	H3	N2	Italy	Europe	1991
H3g1.11	AY661112	Rotterdam/100540/92	Human	H3	N2	Netherlands	Europe	1992
H3g1.11	CY036831	Siena/1/1991	Human	H3	N2	Italy	Europe	1991
H3g1.11	CY035222	Siena/5/1991	Human	H3	N2	Italy	Europe	1991
H3g1.11	CY035230	Siena/6/1991	Human	H3	N2	Italy	Europe	1991
H3g1.11	AY377539	Finland/245/92	Human	H3	N2	Finland	Europe	1992
H3g1.11	AY661101	Lyon/ons1594/91	Human	H3	N2	France	Europe	1991
H3g1.11	AY377538	Finland/190/92	Human	H3	N2	Finland	Europe	1992
H3g1.11	AY661085	Paris/417/92	Human	H3	N2	France	Europe	1992
H3g1.11	AY661089	Paris/490/92	Human	H3	N2	France	Europe	1992
H3g1.11	AY661094	Paris/597/92	Human	H3	N2	France	Europe	1992
H3g1.11	AY661121	Stockholm/8/92	Human	H3	N2	Sweden	Europe	1992
H3g1.11	AY661098	Lyon/1149/91	Human	H3	N2	France	Europe	1991
H3g1.11	AY661100	Lyon/ons1189/91	Human	H3	N2	France	Europe	1991
H3g1.11	AY661111	Geneva/5113/92	Human	H3	N2	Switzerland	Europe	1992
H3g1.11	AY661109	Finland/218/92	Human	H3	N2	Finland	Europe	1992
H3g1.11	AY661108	Netherlands/823/92	Human	H3	N2	Netherlands	Europe	1992
H3g1.11	AY661107	Lyon/chu24222/91	Human	H3	N2	France	Europe	1991
H3g1.11	AY661106	Lyon/chu24103/91	Human	H3	N2	France	Europe	1991
H3g1.11	AY661105	Lyon/chu23672/91	Human	H3	N2	France	Europe	1991
H3g1.11	AY661103	Lyon/ons1276/91	Human	H3	N2	France	Europe	1991
H3g1.11	AY661102	Lyon/ons1373/91	Human	H3	N2	France	Europe	1991
H3g1.11	AY661099	Lyon/1182/91	Human	H3	N2	France	Europe	1991
H3g1.11	AY661092	Paris/564/92	Human	H3	N2	France	Europe	1992
H3g1.11	AY661091	Paris/548/92	Human	H3	N2	France	Europe	1992
H3g1.11	AY661090	Paris/512/92	Human	H3	N2	France	Europe	1992
H3g1.11	AY661087	Paris/457/92	Human	H3	N2	France	Europe	1992
H3g1.11	AY661086	Paris/424/92	Human	H3	N2	France	Europe	1992
H3g1.11	AY661084	Paris/407/92	Human	H3	N2	France	Europe	1992
H3g1.11	AY661083	Paris/325/92	Human	H3	N2	France	Europe	1992
H3g1.11	AY661082	Paris/320/92	Human	H3	N2	France	Europe	1992
H3g1.11	AY661077	Geneva/6447/91	Human	H3	N2	Switzerland	Europe	1991
H3g1.11	AY661113	Nijmegen/3126/92	Human	H3	N2	Netherlands	Europe	1992
H3g1.11	AY377537	Finland/191/92	Human	H3	N2	Finland	Europe	1992
H3g1.11	AY661104	Lyon/ons1337/91	Human	H3	N2	France	Europe	1991
H3g1.11	AY661114	Nijmegen/3129/92	Human	H3	N2	Netherlands	Europe	1992
H3g1.11	AY661078	Netherlands/816/91	Human	H3	N2	Netherlands	Europe	1991
H3g1.11	AY661079	Madrid/G12/91	Human	H3	N2	Spain	Europe	1991
H3g1.11	AY661117	Madrid/G58/92	Human	H3	N2	Spain	Europe	1992
H3g1.11	AY661115	Amsterdam/4112/92	Human	H3	N2	Netherlands	Europe	1992
H3g1.11	AY661116	Tilburg/5957/92	Human	H3	N2	Netherlands	Europe	1992
H3g1.11	AY661118	Madrid/OV31/92	Human	H3	N2	Spain	Europe	1992
H3g1.11	Z46393	England/1/1993	Human	H3	N2	UnitedKingdom	Europe	1993
H3g1.11	Z46412	Scotland/2/1993	Human	H3	N2	UnitedKingdom	Europe	1993
H3g1.11	AF008702	Paris/80/91	Human	H3	N2	France	Europe	1991
H3g1.11	L75978	Finland/189/1991	Human	H3	N2	Finland	Europe	1991
H3g1.11	AY661096	Enschede/1285/92	Human	H3	N2	Netherlands	Europe	1992
H3g1.11	AY661097	Netherlands/935/92	Human	H3	N2	Netherlands	Europe	1992
H3g1.11	AY661093	Paris/583/92	Human	H3	N2	France	Europe	1992
H3g1.11	AY661088	Paris/467/92	Human	H3	N2	France	Europe	1992
H3g1.11	AF008688	England/261/91	Human	H3	N2	UnitedKingdom	Europe	1991
H3g1.11	AY661081	England/261/91	Human	H3	N2	UnitedKingdom	Europe	1991
H3g1.11	AF008701	Spain/118/93	Human	H3	N2	Spain	Europe	1993
H3g1.11	AY661142	Madrid/G116/93	Human	H3	N2	Spain	Europe	1993
H3g1.11	AY661143	Madrid/G101/93	Human	H3	N2	Spain	Europe	1993
H3g1.11	AY661075	England/260/91	Human	H3	N2	UnitedKingdom	Europe	1991
H3g1.11	AY661080	Netherlands/819/92	Human	H3	N2	Netherlands	Europe	1992
H3g1.11	AY661095	Paris/614/92	Human	H3	N2	France	Europe	1992
H3g1.11	AY661146	Netherlands/165/93	Human	H3	N2	Netherlands	Europe	1993
H3g1.11	AY661120	Stockholm/7/92	Human	H3	N2	Sweden	Europe	1992
H3g1.11	L75980	Finland/239/1992	Human	H3	N2	Finland	Europe	1992
H3g1.11	AY661150	Enschede/5458/93	Human	H3	N2	Netherlands	Europe	1993
H3g1.11	AF008693	Umea/2/92	Human	H3	N2	Sweden	Europe	1992
H3g1.11	AF008692	Umea/1/92	Human	H3	N2	Sweden	Europe	1992
H3g1.11	AY661134	Umea/1982/92	Human	H3	N2	Sweden	Europe	1992
H3g1.11	AY661137	Stockholm/13/92	Human	H3	N2	Sweden	Europe	1992
H3g1.11	AY661135	Umea/2000/92	Human	H3	N2	Sweden	Europe	1992
H3g1.11	AF008704	Russia/31/93	Human	H3	N2	Russia	Europe	1993
H3g1.11	AY661132	Paris/287/93	Human	H3	N2	France	Europe	1993
H3g1.11	D49964	OMS/7026/89	Human	H3	N2	Switzerland	Europe	1989
H3g1.11	CY035214	Siena/10/1990	Human	H3	N2	Italy	Europe	1990
H3g1.11	L75976	Finland/133/1990	Human	H3	N2	Finland	Europe	1990
H3g1.11	AF008664	England/648/89	Human	H3	N2	UnitedKingdom	Europe	1989
H3g1.11	CY035206	Siena/4/1990	Human	H3	N2	Italy	Europe	1990
H3g1.11	L75975	Finland/110/1989	Human	H3	N2	Finland	Europe	1989
H3g1.11	AY661067	Netherlands/620/89	Human	H3	N2	Netherlands	Europe	1989
H3g1.11	AY661029	Netherlands/738/89	Human	H3	N2	Netherlands	Europe	1989
H3g1.11	AY661068	Netherlands/650/89	Human	H3	N2	Netherlands	Europe	1989
H3g1.11	L75977	Finland/144/1990	Human	H3	N2	Finland	Europe	1990
H3g1.11	AF204238	England/427/88	Human	H3	N2	UnitedKingdom	Europe	1988
H3g1.11	AF008671	England/88	Human	H3	N2	UnitedKingdom	Europe	1988
H3g1.11	L19001	England/427/1988	Human	H3	N2	UnitedKingdom	Europe	1988
H3g1.11	L18997	England/427/1988	Human	H3	N2	UnitedKingdom	Europe	1988
H3g1.11	AY661057	Geneva/5007/89	Human	H3	N2	Switzerland	Europe	1989
H3g1.11	AF008672	Czechoslovakia/19/89	Human	H3	N2	CzechRepublic	Europe	1989
H3g1.11	AF008685	Hawaii/1/91	Human	H3	N2	USA	NorthAmerica	1991
H3g1.11	L20101	Hawaii/01/1991	Human	H3	N2	USA	NorthAmerica	1991
H3g1.11	L20102	Hawaii/01/1991MDCKandoriginalisolates	Human	H3	N2	USA	NorthAmerica	1991
H3g1.11	AF008681	Indiana/3/91	Human	H3	N2	USA	NorthAmerica	1991
H3g1.11	AF008683	Puerto_Rico/1/90	Human	H3	N2	PuertoRico	NorthAmerica	1990
H3g1.11	AF008679	Pennsylvania/09/91	Human	H3	N2	USA	NorthAmerica	1991
H3g1.11	D30663	Washington/15/91	Human	H3	N2	USA	NorthAmerica	1991
H3g1.11	AY661124	Houston/56798/92	Human	H3	N2	USA	NorthAmerica	1992
H3g1.11	AY661122	Houston/56829/92	Human	H3	N2	USA	NorthAmerica	1992
H3g1.11	AY661123	Houston/56941/92	Human	H3	N2	USA	NorthAmerica	1992
H3g1.11	AF008674	Mexico/3255/94	Human	H3	N2	Mexico	NorthAmerica	1994
H3g1.11	AF008676	Washington/15/91	Human	H3	N2	USA	NorthAmerica	1991
H3g1.11	AF008675	South_Dakota/1/91	Human	H3	N2	USA	NorthAmerica	1991
H3g1.11	L20105	SouthDakota/01/1991	Human	H3	N2	USA	NorthAmerica	1991
H3g1.11	CY003064	Memphis/1/90	Human	H3	N2	USA	NorthAmerica	1990
H3g1.11	AY661069	Memphis/2/90	Human	H3	N2	USA	NorthAmerica	1990
H3g1.11	AY661070	Memphis/5/90	Human	H3	N2	USA	NorthAmerica	1990
H3g1.11	CY011480	Memphis/2/1990	Human	H3	N2	USA	NorthAmerica	1990
H3g1.11	L20103	Indiana/01/1990	Human	H3	N2	USA	NorthAmerica	1990
H3g1.11	L20104	Indiana/01/1990	Human	H3	N2	USA	NorthAmerica	1990
H3g1.11	AY661071	Atlanta/211/89	Human	H3	N2	USA	NorthAmerica	1989
H3g1.11	CY008740	Memphis/7/90	Human	H3	N2	USA	NorthAmerica	1990
H3g1.11	AF008656	Perth/01/92	Human	H3	N2	Australia	Oceania	1992
H3g1.11	AY661076	Canberra/1/91	Human	H3	N2	Australia	Oceania	1991
H3g1.11	AF008673	Victoria/5/89	Human	H3	N2	Australia	Oceania	1989
H3g1.11	AY661058	Wellington/5/89	Human	H3	N2	NewZealand	Oceania	1989
H3g1.11	AF008700	Victoria/29/92	Human	H3	N2	Australia	Oceania	1992
H3g1.11	AF008699	Wellington/66/92	Human	H3	N2	NewZealand	Oceania	1992
H3g1.11	AF008696	South_Australia/68/92	Human	H3	N2	Australia	Oceania	1992
H3g1.11	AF008697	Victoria/68/92	Human	H3	N2	Australia	Oceania	1992
H3g1.11	AY661073	Victoria/2/90	Human	H3	N2	Australia	Oceania	1990
H3g1.11	AY661128	South_Australia/27/92	Human	H3	N2	Australia	Oceania	1992
H3g1.11	AF008680	South_Australia/36/92	Human	H3	N2	Australia	Oceania	1992
H3g1.11	AY661126	South_Australia/8/92	Human	H3	N2	Australia	Oceania	1992
H3g1.11	AY661127	South_Australia/23/92	Human	H3	N2	Australia	Oceania	1992
H3g1.11	DQ336014	Brazil/009/00	Human	H3	N2	Brazil	SouthAmerica	2000
H3g1.11	DQ336013	Brazil/010/00	Human	H3	N2	Brazil	SouthAmerica	2000
H3g1.11	DQ336011	Brazil/008/00	Human	H3	N2	Brazil	SouthAmerica	2000
H3g1.11	DQ336012	Brazil/015/00	Human	H3	N2	Brazil	SouthAmerica	2000
H3g1.11	AF008687	Brazil/91	Human	H3	N2	Brazil	SouthAmerica	1991
H3g1.11	D30662	Brazil/02/91	Human	H3	N2	Brazil	SouthAmerica	1991
H3g1.12	AY661179	Johannesburg/47/94	Human	H3	N2	SouthAfrica	Africa	1994
H3g1.12	AF008774	Johannesburg/33/94	Human	H3	N2	SouthAfrica	Africa	1994
H3g1.12	AY661180	Johannesburg/33/94	Human	H3	N2	SouthAfrica	Africa	1994
H3g1.12	D43792	sw/Obihiro/3/1993	Swine	H3	N2	Japan	Asia	1993
H3g1.12	D43788	Hokkaido/1/1993	Human	H3	N2	Japan	Asia	1993
H3g1.12	AF008769	Hong_Kong/42/96	Human	H3	N2	HongKong	Asia	1996
H3g1.12	AF008777	Japan/86/95	Human	H3	N2	Japan	Asia	1995
H3g1.12	AF180570	HongKong/434/96	Human	H3	N2	HongKong	Asia	1996
H3g1.12	AY661175	Hongkong/1/94	Human	H3	N2	HongKong	Asia	1994
H3g1.12	AY661204	Hongkong/55/94	Human	H3	N2	HongKong	Asia	1994
H3g1.12	Z46407	HongKong/1/1994	Human	H3	N2	HongKong	Asia	1994
H3g1.12	AF008772	Hong_Kong/1/94	Human	H3	N2	HongKong	Asia	1994
H3g1.12	AF008773	Hong_Kong/55/94	Human	H3	N2	HongKong	Asia	1994
H3g1.12	AF008792	Bangkok/122/94	Human	H3	N2	Thailand	Asia	1994
H3g1.12	AF008793	Thailand/75/94	Human	H3	N2	Thailand	Asia	1994
H3g1.12	AF008794	Singapore/7/94	Human	H3	N2	Singapore	Asia	1994
H3g1.12	AF386614	Kangwon/11/99	Human	H3	N2	SouthKorea	Asia	1999
H3g1.12	AF386615	Kangwon/12/99	Human	H3	N2	SouthKorea	Asia	1999
H3g1.12	AF386605	Seoul/16/89	Human	H3	N2	SouthKorea	Asia	1989
H3g1.12	D43789	Hokkaido/2/1993	Human	H3	N2	Japan	Asia	1993
H3g1.12	AF008823	Kitakyushu/93	Human	H3	N2	Japan	Asia	1993
H3g1.12	D30669	Kitakyushu/159/93	Human	H3	N2	Japan	Asia	1993
H3g1.12	AF008808	Guangdong/4/93	Human	H3	N2	China	Asia	1993
H3g1.12	AF008806	Sichuan/4/93	Human	H3	N2	China	Asia	1993
H3g1.12	AF008805	Wuzhou/4/93	Human	H3	N2	China	Asia	1993
H3g1.12	AF008807	Ningxia/10/93	Human	H3	N2	China	Asia	1993
H3g1.12	AY661211	Singapore/3/93	Human	H3	N2	Singapore	Asia	1993
H3g1.12	AF008822	Nanchang/3396/93	Human	H3	N2	China	Asia	1993
H3g1.12	AF008802	Nanchang/3332/93	Human	H3	N2	China	Asia	1993
H3g1.12	AF008803	Nanchang/58/93	Human	H3	N2	China	Asia	1993
H3g1.12	AF008801	Nangchang/12/93	Human	H3	N2	China	Asia	1993
H3g1.12	CY009012	Nanchang/12/93	Human	H3	N2	China	Asia	1993
H3g1.12	CY006339	Nanchang/0058/94	Human	H3	N2	China	Asia	1994
H3g1.12	CY006347	Nanchang/58/93	Human	H3	N2	China	Asia	1993
H3g1.12	CY006331	Nanchang/A2/94	Human	H3	N2	China	Asia	1994
H3g1.12	CY007835	Nanchang/A1/94	Human	H3	N2	China	Asia	1994
H3g1.12	CY003752	Nanchang/0074/94	Human	H3	N2	China	Asia	1994
H3g1.12	AF008809	Harbin/15/92	Human	H3	N2	China	Asia	1992
H3g1.12	AF008824	Hong_Kong/23/92	Human	H3	N2	HongKong	Asia	1992
H3g1.12	AY661155	Akita/4/93	Human	H3	N2	Japan	Asia	1993
H3g1.12	AB043707	Aichi/4/93	Human	H3	N2	Japan	Asia	1993
H3g1.12	AF386616	Kangwon/88/99	Human	H3	N2	SouthKorea	Asia	1999
H3g1.12	AF386617	Kangwon/93/99	Human	H3	N2	SouthKorea	Asia	1999
H3g1.12	AF386613	Daegu/103/98	Human	H3	N2	SouthKorea	Asia	1998
H3g1.12	CY036903	Shangdong/9/1993	Human	H3	N2	China	Asia	1993
H3g1.12	AF008820	Shangdong/9/93	Human	H3	N2	China	Asia	1993
H3g1.12	AY661159	Shangdong/9/93	Human	H3	N2	China	Asia	1993
H3g1.12	L76037	Shangdong/9/1993	Human	H3	N2	China	Asia	1993
H3g1.12	Z46417	Shangdong/9/1993	Human	H3	N2	China	Asia	1993
H3g1.12	AF180566	Yokohama/73/92	Human	H3	N2	Japan	Asia	1992
H3g1.12	D30665	Yokohama/73/92	Human	H3	N2	Japan	Asia	1992
H3g1.12	AF180565	Hebei/12/93	Human	H3	N2	China	Asia	1993
H3g1.12	D30668	Hebei/12/93	Human	H3	N2	China	Asia	1993
H3g1.12	AY661153	Yamagata/61/93	Human	H3	N2	Japan	Asia	1993
H3g1.12	AY661154	Yamagata/62/93	Human	H3	N2	Japan	Asia	1993
H3g1.12	AY661152	Yamagata/56/93	Human	H3	N2	Japan	Asia	1993
H3g1.12	AY661156	Shiga/6/93	Human	H3	N2	Japan	Asia	1993
H3g1.12	AY661129	Sendai/C273/92	Human	H3	N2	Japan	Asia	1992
H3g1.12	AF008819	Sapporro/92	Human	H3	N2	Japan	Asia	1992
H3g1.12	AF008816	Qingdao/53/92	Human	H3	N2	China	Asia	1992
H3g1.12	U77832	Tottori/872K4/1994	Human	H3	N2	Japan	Asia	1994
H3g1.12	U77835	Tottori/849AM4/1994	Human	H3	N2	Japan	Asia	1994
H3g1.12	U77836	Tottori/872AM4/1994	Human	H3	N2	Japan	Asia	1994
H3g1.12	U77838	Tottori/872AM1AL3/1994	Human	H3	N2	Japan	Asia	1994
H3g1.12	U77840	Tottori/872AM2AL3/1994	Human	H3	N2	Japan	Asia	1994
H3g1.12	U77839	Tottori/849AM2AL3/1994	Human	H3	N2	Japan	Asia	1994
H3g1.12	U77834	Tottori/872AM2/1994	Human	H3	N2	Japan	Asia	1994
H3g1.12	U77831	Tottori/849K4/1994)hemagglutinin	Human	H3	N2	Japan	Asia	1994
H3g1.12	U77833	Tottori/849AM2/1994	Human	H3	N2	Japan	Asia	1994
H3g1.12	U77837	Tottori/849AM1AL3/1994	Human	H3	N2	Japan	Asia	1994
H3g1.12	AF008810	Indonesia/3109/91	Human	H3	N2	Indonesia	Asia	1991
H3g1.12	AF180564	Tianjing/33/92	Human	H3	N2	China	Asia	1992
H3g1.12	D30664	Tianjin/33/92	Human	H3	N2	China	Asia	1992
H3g1.12	AY661130	Beijing/32/92	Human	H3	N2	China	Asia	1992
H3g1.12	CY033606	Beijing/32/1992	Human	H3	N2	China	Asia	1992
H3g1.12	U26830	Beijing/32/1992	Human	H3	N2	China	Asia	1992
H3g1.12	L76035	Beijing/32/1992	Human	H3	N2	China	Asia	1992
H3g1.12	AF008813	Beijing/46/92	Human	H3	N2	China	Asia	1992
H3g1.12	AF008812	Beijing/32/92	Human	H3	N2	China	Asia	1992
H3g1.12	AF008856	Harbin/3/94	Human	H3	N2	China	Asia	1994
H3g1.12	AF008858	Wuzhou/1/94	Human	H3	N2	China	Asia	1994
H3g1.12	Z46408	HongKong/2/1994	Human	H3	N2	HongKong	Asia	1994
H3g1.12	AY137206	Guangdong/28/94	Human	H3	N2	China	Asia	1994
H3g1.12	U48442	Guandong/28/1994	Human	H3	N2	China	Asia	1994
H3g1.12	AF008828	Guangdong/25/93	Human	H3	N2	China	Asia	1993
H3g1.12	Z46406	Guangdong/25/1993	Human	H3	N2	China	Asia	1993
H3g1.12	AF008848	Guangdong/27/94	Human	H3	N2	China	Asia	1994
H3g1.12	AY661178	Hongkong/56/94	Human	H3	N2	HongKong	Asia	1994
H3g1.12	U48440	Sendai/c384/1994	Human	H3	N2	Japan	Asia	1994
H3g1.12	AB043708	Aichi/2/94	Human	H3	N2	Japan	Asia	1994
H3g1.12	U48439	Sendai/c182/1994	Human	H3	N2	Japan	Asia	1994
H3g1.12	U48443	Akita/1/94	Human	H3	N2	Japan	Asia	1994
H3g1.12	AF008825	Akita/1/94	Human	H3	N2	Japan	Asia	1994
H3g1.12	EF456783	England/79/1994	Human	H3	N2	UnitedKingdom	Europe	1994
H3g1.12	EF456792	England/54/1995	Human	H3	N2	UnitedKingdom	Europe	1995
H3g1.12	Z46403	England/67/1994	Human	H3	N2	UnitedKingdom	Europe	1994
H3g1.12	EF456787	England/258/1995	Human	H3	N2	UnitedKingdom	Europe	1995
H3g1.12	AF008783	Spain/351/95	Human	H3	N2	Spain	Europe	1995
H3g1.12	EF456788	England/263/1995	Human	H3	N2	UnitedKingdom	Europe	1995
H3g1.12	EF456790	England/282/1995	Human	H3	N2	UnitedKingdom	Europe	1995
H3g1.12	EF456785	England/178/1995	Human	H3	N2	UnitedKingdom	Europe	1995
H3g1.12	AY661181	Netherlands/1/95	Human	H3	N2	Netherlands	Europe	1995
H3g1.12	AF008778	Spain/378/95	Human	H3	N2	Spain	Europe	1995
H3g1.12	EF456789	England/268/1995	Human	H3	N2	UnitedKingdom	Europe	1995
H3g1.12	EF456784	England/121/1995	Human	H3	N2	UnitedKingdom	Europe	1995
H3g1.12	Z46404	England/68/1994	Human	H3	N2	UnitedKingdom	Europe	1994
H3g1.12	AF180568	Paris/83/95	Human	H3	N2	France	Europe	1995
H3g1.12	AF180569	Paris/363/95	Human	H3	N2	France	Europe	1995
H3g1.12	AY661169	Lyon/1803/93	Human	H3	N2	France	Europe	1993
H3g1.12	AF008800	Russia/46967/94	Human	H3	N2	Russia	Europe	1994
H3g1.12	Z46400	England/346/1993	Human	H3	N2	UnitedKingdom	Europe	1993
H3g1.12	AY661174	Oslo/2352/93	Human	H3	N2	Norway	Europe	1993
H3g1.12	AF008799	France/1109/94	Human	H3	N2	France	Europe	1994
H3g1.12	Z46398	England/289/1993	Human	H3	N2	UnitedKingdom	Europe	1993
H3g1.12	AY661162	Netherlands/357/93	Human	H3	N2	Netherlands	Europe	1993
H3g1.12	AY661167	Netherlands/399/93	Human	H3	N2	Netherlands	Europe	1993
H3g1.12	AY661165	Netherlands/440/93	Human	H3	N2	Netherlands	Europe	1993
H3g1.12	Z46413	Scotland/142/1993	Human	H3	N2	UnitedKingdom	Europe	1993
H3g1.12	Z46402	England/471/1993	Human	H3	N2	UnitedKingdom	Europe	1993
H3g1.12	AF008853	Ulan_Ude/44/94	Human	H3	N2	Russia	Europe	1994
H3g1.12	Z46414	Scotland/160/1993	Human	H3	N2	UnitedKingdom	Europe	1993
H3g1.12	AF008826	Romania/160/94	Human	H3	N2	Romania	Europe	1994
H3g1.12	Z46401	England/347/1993	Human	H3	N2	UnitedKingdom	Europe	1993
H3g1.12	L75983	Finland/274/1993	Human	H3	N2	Finland	Europe	1993
H3g1.12	AY377543	Finland/273/93	Human	H3	N2	Finland	Europe	1993
H3g1.12	AF008835	France/1203/94	Human	H3	N2	France	Europe	1994
H3g1.12	Z46397	England/286/1993	Human	H3	N2	UnitedKingdom	Europe	1993
H3g1.12	Z46399	England/328/1993	Human	H3	N2	UnitedKingdom	Europe	1993
H3g1.12	AY661173	Oslo/2219/93	Human	H3	N2	Norway	Europe	1993
H3g1.12	AY377542	Finland/331/93	Human	H3	N2	Finland	Europe	1993
H3g1.12	L75984	Finland/276/1993	Human	H3	N2	Finland	Europe	1993
H3g1.12	L75987	Finland/295/1993	Human	H3	N2	Finland	Europe	1993
H3g1.12	AY262745	Finland/300/93	Human	H3	N2	Finland	Europe	1993
H3g1.12	L75988	Finland/296/1993	Human	H3	N2	Finland	Europe	1993
H3g1.12	AY377541	Finland/321/93	Human	H3	N2	Finland	Europe	1993
H3g1.12	AF442483	Finland/280/93	Human	H3	N2	Finland	Europe	1993
H3g1.12	L75986	Finland/292/1993	Human	H3	N2	Finland	Europe	1993
H3g1.12	AY661161	Stockholm/20/93	Human	H3	N2	Sweden	Europe	1993
H3g1.12	L75985	Finland/278/1993	Human	H3	N2	Finland	Europe	1993
H3g1.12	AY462237	Finland/256/93	Human	H3	N2	Finland	Europe	1993
H3g1.12	AY661164	Netherlands/371/93	Human	H3	N2	Netherlands	Europe	1993
H3g1.12	Z46415	Scotland/174/1993	Human	H3	N2	UnitedKingdom	Europe	1993
H3g1.12	Z46405	England/7/1994	Human	H3	N2	UnitedKingdom	Europe	1994
H3g1.12	AY661170	Lyon/1815/93	Human	H3	N2	France	Europe	1993
H3g1.12	AY661171	Lyon/22686/93	Human	H3	N2	France	Europe	1993
H3g1.12	AY377545	Finland/269/93	Human	H3	N2	Finland	Europe	1993
H3g1.12	AY377546	Finland/250/93	Human	H3	N2	Finland	Europe	1993
H3g1.12	AY661151	Madrid/G252/93	Human	H3	N2	Spain	Europe	1993
H3g1.12	Z46411	Madrid/252/1993	Human	H3	N2	Spain	Europe	1993
H3g1.12	L75982	Finland/263/1993	Human	H3	N2	Finland	Europe	1993
H3g1.12	AY377544	Finland/270/93	Human	H3	N2	Finland	Europe	1993
H3g1.12	AF008844	Stockholm/1/93	Human	H3	N2	Sweden	Europe	1993
H3g1.12	AF008843	Spain/190/93	Human	H3	N2	Spain	Europe	1993
H3g1.12	AF008840	England/220/93	Human	H3	N2	UnitedKingdom	Europe	1993
H3g1.12	Z46394	England/247/1993	Human	H3	N2	UnitedKingdom	Europe	1993
H3g1.12	AY661145	Madrid/G109/93	Human	H3	N2	Spain	Europe	1993
H3g1.12	AY661149	Netherlands/179/93	Human	H3	N2	Netherlands	Europe	1993
H3g1.12	AF008842	Spain/125/93	Human	H3	N2	Spain	Europe	1993
H3g1.12	AY661147	Madrid/G122/93	Human	H3	N2	Spain	Europe	1993
H3g1.12	AY661172	Lyon/23602/93	Human	H3	N2	France	Europe	1993
H3g1.12	Z46395	England/269/93	Human	H3	N2	UnitedKingdom	Europe	1993
H3g1.12	Z46416	Scotland/173/1993	Human	H3	N2	UnitedKingdom	Europe	1993
H3g1.12	AY661020	Netherlands/18/94	Human	H3	N2	Netherlands	Europe	1994
H3g1.12	AY661160	Netherlands/241/93	Human	H3	N2	Netherlands	Europe	1993
H3g1.12	AY661166	Netherlands/398/93	Human	H3	N2	Netherlands	Europe	1993
H3g1.12	AF008831	Romania/182/94	Human	H3	N2	Romania	Europe	1994
H3g1.12	Z46396	England/284/1993	Human	H3	N2	UnitedKingdom	Europe	1993
H3g1.12	AF008834	Netherlands/372/93	Human	H3	N2	Netherlands	Europe	1993
H3g1.12	AY661163	Netherlands/372/93	Human	H3	N2	Netherlands	Europe	1993
H3g1.12	AF008804	Russia/58/93	Human	H3	N2	Russia	Europe	1993
H3g1.12	AY661140	Netherlands/115/93	Human	H3	N2	Netherlands	Europe	1993
H3g1.12	AY661141	Netherlands/126/93	Human	H3	N2	Netherlands	Europe	1993
H3g1.12	AY661131	Netherlands/3/93	Human	H3	N2	Netherlands	Europe	1993
H3g1.12	AY661133	Netherlands/17/93	Human	H3	N2	Netherlands	Europe	1993
H3g1.12	AY661139	Netherlands/101/93	Human	H3	N2	Netherlands	Europe	1993
H3g1.12	AY661144	Madrid/G102/93	Human	H3	N2	Spain	Europe	1993
H3g1.12	AY661148	Madrid/G130/93	Human	H3	N2	Spain	Europe	1993
H3g1.12	AY661168	Lyon/672/93	Human	H3	N2	France	Europe	1993
H3g1.12	AF008818	Paris/688/93	Human	H3	N2	France	Europe	1993
H3g1.12	AY661136	Stockholm/12/92	Human	H3	N2	Sweden	Europe	1992
H3g1.12	AY661138	Finland/247/92	Human	H3	N2	Finland	Europe	1992
H3g1.12	L75981	Finland/247/1992	Human	H3	N2	Finland	Europe	1992
H3g1.12	AF008770	New_York/28/96	Human	H3	N2	USA	NorthAmerica	1996
H3g1.12	AF008771	Memphis/1/96	Human	H3	N2	USA	NorthAmerica	1996
H3g1.12	AF008791	New_York/17/94	Human	H3	N2	USA	NorthAmerica	1994
H3g1.12	CY012224	NewYork/657/1994	Human	H3	N2	USA	NorthAmerica	1994
H3g1.12	AF008787	New_York/28/94	Human	H3	N2	USA	NorthAmerica	1994
H3g1.12	AF008789	California/5/95	Human	H3	N2	USA	NorthAmerica	1995
H3g1.12	AF008788	Pennsylvania/7/94	Human	H3	N2	USA	NorthAmerica	1994
H3g1.12	AF008775	Louisiana/1/95	Human	H3	N2	USA	NorthAmerica	1995
H3g1.12	AF008776	New_Jersey/8/94	Human	H3	N2	USA	NorthAmerica	1994
H3g1.12	AF008785	Massachussetts/1/95	Human	H3	N2	USA	NorthAmerica	1995
H3g1.12	AF008786	Pennsylvania/15/95	Human	H3	N2	USA	NorthAmerica	1995
H3g1.12	CY017291	NewYork/681/1995	Human	H3	N2	USA	NorthAmerica	1995
H3g1.12	AF008784	Texas/5/94	Human	H3	N2	USA	NorthAmerica	1994
H3g1.12	CY011360	NewYork/702/1995	Human	H3	N2	USA	NorthAmerica	1995
H3g1.12	CY012472	NewYork/664/1995	Human	H3	N2	USA	NorthAmerica	1995
H3g1.12	AF008782	Illinois/5/95	Human	H3	N2	USA	NorthAmerica	1995
H3g1.12	AF008780	New_Jersey/10/95	Human	H3	N2	USA	NorthAmerica	1995
H3g1.12	AF008781	Ohio/3/95	Human	H3	N2	USA	NorthAmerica	1995
H3g1.12	AF008779	Canada/124/95	Human	H3	N2	Canada	NorthAmerica	1995
H3g1.12	CY012232	NewYork/670/1995	Human	H3	N2	USA	NorthAmerica	1995
H3g1.12	CY011824	NewYork/684/1995	Human	H3	N2	USA	NorthAmerica	1995
H3g1.12	CY012896	NewYork/673/1995	Human	H3	N2	USA	NorthAmerica	1995
H3g1.12	CY011328	NewYork/695/1995	Human	H3	N2	USA	NorthAmerica	1995
H3g1.12	CY011528	NewYork/669/1995	Human	H3	N2	USA	NorthAmerica	1995
H3g1.12	CY011336	NewYork/696/1994	Human	H3	N2	USA	NorthAmerica	1994
H3g1.12	CY011496	NewYork/658/1995	Human	H3	N2	USA	NorthAmerica	1995
H3g1.12	CY012256	NewYork/682/1995	Human	H3	N2	USA	NorthAmerica	1995
H3g1.12	CY012904	NewYork/683/1995	Human	H3	N2	USA	NorthAmerica	1995
H3g1.12	CY011520	NewYork/665/1994	Human	H3	N2	USA	NorthAmerica	1994
H3g1.12	CY011544	NewYork/672/1995	Human	H3	N2	USA	NorthAmerica	1995
H3g1.12	CY011560	NewYork/679/1995	Human	H3	N2	USA	NorthAmerica	1995
H3g1.12	CY011568	NewYork/693/1995	Human	H3	N2	USA	NorthAmerica	1995
H3g1.12	CY011344	NewYork/697/1995	Human	H3	N2	USA	NorthAmerica	1995
H3g1.12	CY012248	NewYork/677/1995	Human	H3	N2	USA	NorthAmerica	1995
H3g1.12	CY011832	NewYork/685/1995	Human	H3	N2	USA	NorthAmerica	1995
H3g1.12	CY012912	NewYork/686/1995	Human	H3	N2	USA	NorthAmerica	1995
H3g1.12	CY013327	NewYork/688/1994	Human	H3	N2	USA	NorthAmerica	1994
H3g1.12	CY011352	NewYork/698/1995	Human	H3	N2	USA	NorthAmerica	1995
H3g1.12	CY011504	NewYork/659/1994	Human	H3	N2	USA	NorthAmerica	1994
H3g1.12	CY012456	NewYork/661/1994	Human	H3	N2	USA	NorthAmerica	1994
H3g1.12	CY012512	NewYork/691/1995	Human	H3	N2	USA	NorthAmerica	1995
H3g1.12	CY017283	NewYork/680/1995	Human	H3	N2	USA	NorthAmerica	1995
H3g1.12	CY011848	NewYork/689/1995	Human	H3	N2	USA	NorthAmerica	1995
H3g1.12	CY012240	NewYork/675/1995	Human	H3	N2	USA	NorthAmerica	1995
H3g1.12	CY012464	NewYork/663/1994	Human	H3	N2	USA	NorthAmerica	1994
H3g1.12	CY012480	NewYork/666/1995	Human	H3	N2	USA	NorthAmerica	1995
H3g1.12	CY012920	NewYork/690/1995	Human	H3	N2	USA	NorthAmerica	1995
H3g1.12	CY012488	NewYork/667/1995	Human	H3	N2	USA	NorthAmerica	1995
H3g1.12	AF008860	New_York/15/94	Human	H3	N2	USA	NorthAmerica	1994
H3g1.12	AF008857	Pennsylvania/9/93	Human	H3	N2	USA	NorthAmerica	1993
H3g1.12	AF008798	New_York/64/93	Human	H3	N2	USA	NorthAmerica	1993
H3g1.12	AF008797	New_York/63/93	Human	H3	N2	USA	NorthAmerica	1993
H3g1.12	CY012528	NewYork/705/1994	Human	H3	N2	USA	NorthAmerica	1994
H3g1.12	CY013168	NewYork/754/1993	Human	H3	N2	USA	NorthAmerica	1993
H3g1.12	CY012736	NewYork/770/1993	Human	H3	N2	USA	NorthAmerica	1993
H3g1.12	AF008821	New_York/13/93	Human	H3	N2	USA	NorthAmerica	1993
H3g1.12	CY012144	NewYork/760/1993	Human	H3	N2	USA	NorthAmerica	1993
H3g1.12	CY013733	NewYork/794/1993	Human	H3	N2	USA	NorthAmerica	1993
H3g1.12	CY013192	NewYork/782/1993	Human	H3	N2	USA	NorthAmerica	1993
H3g1.12	AF008815	Hawaii/3/92	Human	H3	N2	USA	NorthAmerica	1992
H3g1.12	AF008814	Alaska/9/92	Human	H3	N2	USA	NorthAmerica	1992
H3g1.12	AF008817	California/271/92	Human	H3	N2	USA	NorthAmerica	1992
H3g1.12	CY012128	NewYork/758/1993	Human	H3	N2	USA	NorthAmerica	1993
H3g1.12	AF008855	California/4/94	Human	H3	N2	USA	NorthAmerica	1994
H3g1.12	CY011888	NewYork/716/1994	Human	H3	N2	USA	NorthAmerica	1994
H3g1.12	CY012968	NewYork/735/1994	Human	H3	N2	USA	NorthAmerica	1994
H3g1.12	CY011880	NewYork/715/1994	Human	H3	N2	USA	NorthAmerica	1994
H3g1.12	AF008796	New_York/42/95	Human	H3	N2	USA	NorthAmerica	1995
H3g1.12	AF008795	New_York/16/94	Human	H3	N2	USA	NorthAmerica	1994
H3g1.12	CY011488	NewYork/654/1994	Human	H3	N2	USA	NorthAmerica	1994
H3g1.12	AF008849	North_Carolina/93	Human	H3	N2	USA	NorthAmerica	1993
H3g1.12	AF008850	Washington/26/93	Human	H3	N2	USA	NorthAmerica	1993
H3g1.12	AF008851	Wyoming/1/93	Human	H3	N2	USA	NorthAmerica	1993
H3g1.12	AF008852	Washington/41/93	Human	H3	N2	USA	NorthAmerica	1993
H3g1.12	CY012584	NewYork/748/1994	Human	H3	N2	USA	NorthAmerica	1994
H3g1.12	CY012576	NewYork/747/1994	Human	H3	N2	USA	NorthAmerica	1994
H3g1.12	CY012448	NewYork/655/1994	Human	H3	N2	USA	NorthAmerica	1994
H3g1.12	CY011920	NewYork/726/1994	Human	H3	N2	USA	NorthAmerica	1994
H3g1.12	CY010988	NewYork/733/1994	Human	H3	N2	USA	NorthAmerica	1994
H3g1.12	CY013887	NewYork/717/1994	Human	H3	N2	USA	NorthAmerica	1994
H3g1.12	CY012536	NewYork/707/1994	Human	H3	N2	USA	NorthAmerica	1994
H3g1.12	CY012992	NewYork/739/1994	Human	H3	N2	USA	NorthAmerica	1994
H3g1.12	CY013367	NewYork/745/1994	Human	H3	N2	USA	NorthAmerica	1994
H3g1.12	CY012944	NewYork/723/1994	Human	H3	N2	USA	NorthAmerica	1994
H3g1.12	CY012592	NewYork/749/1994	Human	H3	N2	USA	NorthAmerica	1994
H3g1.12	CY013016	NewYork/750/1994	Human	H3	N2	USA	NorthAmerica	1994
H3g1.12	AF008832	Vermont/3/94	Human	H3	N2	USA	NorthAmerica	1994
H3g1.12	CY013024	NewYork/753/1994	Human	H3	N2	USA	NorthAmerica	1994
H3g1.12	CY012984	NewYork/738/1994	Human	H3	N2	USA	NorthAmerica	1994
H3g1.12	CY012936	NewYork/718/1994	Human	H3	N2	USA	NorthAmerica	1994
H3g1.12	CY013008	NewYork/741/1994	Human	H3	N2	USA	NorthAmerica	1994
H3g1.12	CY012544	NewYork/710/1994	Human	H3	N2	USA	NorthAmerica	1994
H3g1.12	CY012568	NewYork/746/1994	Human	H3	N2	USA	NorthAmerica	1994
H3g1.12	CY011904	NewYork/720/1994	Human	H3	N2	USA	NorthAmerica	1994
H3g1.12	CY012960	NewYork/725/1994	Human	H3	N2	USA	NorthAmerica	1994
H3g1.12	CY011872	NewYork/712/1993	Human	H3	N2	USA	NorthAmerica	1993
H3g1.12	CY012280	NewYork/730/1994	Human	H3	N2	USA	NorthAmerica	1994
H3g1.12	CY015540	NewYork/737/1994	Human	H3	N2	USA	NorthAmerica	1994
H3g1.12	AF008833	California/5/93	Human	H3	N2	USA	NorthAmerica	1993
H3g1.12	CY011912	NewYork/721/1994	Human	H3	N2	USA	NorthAmerica	1994
H3g1.12	CY012288	NewYork/734/1994	Human	H3	N2	USA	NorthAmerica	1994
H3g1.12	CY017307	NewYork/704/1994	Human	H3	N2	USA	NorthAmerica	1994
H3g1.12	CY013343	NewYork/742/1994	Human	H3	N2	USA	NorthAmerica	1994
H3g1.12	CY013351	NewYork/743/1994	Human	H3	N2	USA	NorthAmerica	1994
H3g1.12	CY011944	NewYork/752/1993	Human	H3	N2	USA	NorthAmerica	1993
H3g1.12	CY011896	NewYork/719/1994	Human	H3	N2	USA	NorthAmerica	1994
H3g1.12	CY011384	NewYork/732/1994	Human	H3	N2	USA	NorthAmerica	1994
H3g1.12	CY011936	NewYork/728/1994	Human	H3	N2	USA	NorthAmerica	1994
H3g1.12	CY012272	NewYork/729/1994	Human	H3	N2	USA	NorthAmerica	1994
H3g1.12	CY012976	NewYork/736/1994	Human	H3	N2	USA	NorthAmerica	1994
H3g1.12	CY011864	NewYork/711/1994	Human	H3	N2	USA	NorthAmerica	1994
H3g1.12	CY011928	NewYork/727/1994	Human	H3	N2	USA	NorthAmerica	1994
H3g1.12	CY011856	NewYork/709/1994	Human	H3	N2	USA	NorthAmerica	1994
H3g1.12	CY012560	NewYork/714/1994	Human	H3	N2	USA	NorthAmerica	1994
H3g1.12	CY011576	NewYork/751/1993	Human	H3	N2	USA	NorthAmerica	1993
H3g1.12	CY013359	NewYork/744/1994	Human	H3	N2	USA	NorthAmerica	1994
H3g1.12	CY013335	NewYork/731/1994	Human	H3	N2	USA	NorthAmerica	1994
H3g1.12	CY016427	NewYork/706/1993	Human	H3	N2	USA	NorthAmerica	1993
H3g1.12	CY012264	NewYork/722/1994	Human	H3	N2	USA	NorthAmerica	1994
H3g1.12	CY012552	NewYork/713/1994	Human	H3	N2	USA	NorthAmerica	1994
H3g1.12	CY012952	NewYork/724/1994	Human	H3	N2	USA	NorthAmerica	1994
H3g1.12	CY011376	NewYork/708/1994	Human	H3	N2	USA	NorthAmerica	1994
H3g1.12	CY013000	NewYork/740/1994	Human	H3	N2	USA	NorthAmerica	1994
H3g1.12	AF180567	Louisiana/1/93	Human	H3	N2	USA	NorthAmerica	1993
H3g1.12	AF008829	Louisiana/4/93	Human	H3	N2	USA	NorthAmerica	1993
H3g1.12	AF008830	Louisiana/6/93	Human	H3	N2	USA	NorthAmerica	1993
H3g1.12	AF008836	Ann_Arbor/3/93	Human	H3	N2	USA	NorthAmerica	1993
H3g1.12	AF008846	Texas/57/93	Human	H3	N2	USA	NorthAmerica	1993
H3g1.12	AF008847	New_York/38/93	Human	H3	N2	USA	NorthAmerica	1993
H3g1.12	CY012184	NewYork/765/1993	Human	H3	N2	USA	NorthAmerica	1993
H3g1.12	CY012168	NewYork/763/1993	Human	H3	N2	USA	NorthAmerica	1993
H3g1.12	CY013208	NewYork/785/1993	Human	H3	N2	USA	NorthAmerica	1993
H3g1.12	CY013669	NewYork/780/1993	Human	H3	N2	USA	NorthAmerica	1993
H3g1.12	CY014143	NewYork/793/1993	Human	H3	N2	USA	NorthAmerica	1993
H3g1.12	CY013637	NewYork/772/1993	Human	H3	N2	USA	NorthAmerica	1993
H3g1.12	CY012784	NewYork/786/1993	Human	H3	N2	USA	NorthAmerica	1993
H3g1.12	CY016483	NewYork/800/1993	Human	H3	N2	USA	NorthAmerica	1993
H3g1.12	CY013765	NewYork/799/1993	Human	H3	N2	USA	NorthAmerica	1993
H3g1.12	CY013725	NewYork/792/1993	Human	H3	N2	USA	NorthAmerica	1993
H3g1.12	CY013661	NewYork/776/1993	Human	H3	N2	USA	NorthAmerica	1993
H3g1.12	CY012136	NewYork/759/1993	Human	H3	N2	USA	NorthAmerica	1993
H3g1.12	CY014151	NewYork/796/1993	Human	H3	N2	USA	NorthAmerica	1993
H3g1.12	CY013685	NewYork/787/1993	Human	H3	N2	USA	NorthAmerica	1993
H3g1.12	CY013653	NewYork/774/1993	Human	H3	N2	USA	NorthAmerica	1993
H3g1.12	CY013709	NewYork/790/1993	Human	H3	N2	USA	NorthAmerica	1993
H3g1.12	CY013741	NewYork/795/1993	Human	H3	N2	USA	NorthAmerica	1993
H3g1.12	CY012776	NewYork/779/1993	Human	H3	N2	USA	NorthAmerica	1993
H3g1.12	CY012768	NewYork/778/1993	Human	H3	N2	USA	NorthAmerica	1993
H3g1.12	CY012160	NewYork/762/1993	Human	H3	N2	USA	NorthAmerica	1993
H3g1.12	AF008845	New_York/3/93	Human	H3	N2	USA	NorthAmerica	1993
H3g1.12	CY012728	NewYork/767/1993	Human	H3	N2	USA	NorthAmerica	1993
H3g1.12	CY013645	NewYork/773/1993	Human	H3	N2	USA	NorthAmerica	1993
H3g1.12	CY013701	NewYork/789/1993	Human	H3	N2	USA	NorthAmerica	1993
H3g1.12	AF008838	Alaska/18/93	Human	H3	N2	USA	NorthAmerica	1993
H3g1.12	CY013200	NewYork/783/1993	Human	H3	N2	USA	NorthAmerica	1993
H3g1.12	CY012152	NewYork/761/1993	Human	H3	N2	USA	NorthAmerica	1993
H3g1.12	CY013605	NewYork/757/1993	Human	H3	N2	USA	NorthAmerica	1993
H3g1.12	CY012760	NewYork/777/1993	Human	H3	N2	USA	NorthAmerica	1993
H3g1.12	CY013693	NewYork/788/1993	Human	H3	N2	USA	NorthAmerica	1993
H3g1.12	AF008841	Georgia/3/93	Human	H3	N2	USA	NorthAmerica	1993
H3g1.12	CY012120	NewYork/756/1993	Human	H3	N2	USA	NorthAmerica	1993
H3g1.12	CY013717	NewYork/791/1993	Human	H3	N2	USA	NorthAmerica	1993
H3g1.12	CY013613	NewYork/766/1993	Human	H3	N2	USA	NorthAmerica	1993
H3g1.12	CY012752	NewYork/775/1993	Human	H3	N2	USA	NorthAmerica	1993
H3g1.12	CY013176	NewYork/755/1993	Human	H3	N2	USA	NorthAmerica	1993
H3g1.12	CY012176	NewYork/764/1993	Human	H3	N2	USA	NorthAmerica	1993
H3g1.12	CY013184	NewYork/781/1993	Human	H3	N2	USA	NorthAmerica	1993
H3g1.12	CY013789	NewYork/803/1993	Human	H3	N2	USA	NorthAmerica	1993
H3g1.12	CY013629	NewYork/769/1993	Human	H3	N2	USA	NorthAmerica	1993
H3g1.12	CY013621	NewYork/768/1993	Human	H3	N2	USA	NorthAmerica	1993
H3g1.12	CY013773	NewYork/801/1993	Human	H3	N2	USA	NorthAmerica	1993
H3g1.12	CY013757	NewYork/798/1993	Human	H3	N2	USA	NorthAmerica	1993
H3g1.12	CY013749	NewYork/797/1993	Human	H3	N2	USA	NorthAmerica	1993
H3g1.12	CY013781	NewYork/802/1993	Human	H3	N2	USA	NorthAmerica	1993
H3g1.12	AF008839	New_York/26/93	Human	H3	N2	USA	NorthAmerica	1993
H3g1.12	CY012744	NewYork/771/1993	Human	H3	N2	USA	NorthAmerica	1993
H3g1.12	CY013677	NewYork/784/1993	Human	H3	N2	USA	NorthAmerica	1993
H3g1.12	AF008811	Victoria/1/93	Human	H3	N2	Australia	Oceania	1993
H3g1.12	AY661157	Victoria/104/93	Human	H3	N2	Australia	Oceania	1993
H3g1.12	AY661176	South_Australia/15/94	Human	H3	N2	Australia	Oceania	1994
H3g1.12	AY661177	South_Australia/25/94	Human	H3	N2	Australia	Oceania	1994
H3g1.12	AY661158	Wellington/59/93	Human	H3	N2	NewZealand	Oceania	1993
H3g1.12	AF008837	Christ_Church/8/93	Human	H3	N2	NewZealand	Oceania	1993
H3g1.12	AF008854	Waikato/20/93	Human	H3	N2	NewZealand	Oceania	1993
H3g1.12	AF008790	Argentina/3779/94	Human	H3	N2	Argentina	SouthAmerica	1994
H3g1.12	AF008859	Santiago/7198/94	Human	H3	N2	Chile	SouthAmerica	1994
H3g1.12	AF008827	Argentina/3105/93	Human	H3	N2	Argentina	SouthAmerica	1993
H3g1.13	AF008768	Johannesburg/2/95	Human	H3	N2	SouthAfrica	Africa	1995
H3g1.13	AF008745	Johannesburg/17/95	Human	H3	N2	SouthAfrica	Africa	1995
H3g1.13	AF180665	Johannesburg/53/96	Human	H3	N2	SouthAfrica	Africa	1996
H3g1.13	AF180642	Johannesburg/9/97	Human	H3	N2	SouthAfrica	Africa	1997
H3g1.13	DQ534420	Kenitra/17/97	Human	H3	N2	Morocco	Africa	1997
H3g1.13	DQ534421	Rabat/18/97	Human	H3	N2	Morocco	Africa	1997
H3g1.13	AF180643	Johannesburg/10/97	Human	H3	N2	SouthAfrica	Africa	1997
H3g1.13	AF180605	Johannesburg/3/97	Human	H3	N2	SouthAfrica	Africa	1997
H3g1.13	DQ534425	Fes/314//98	Human	H3	N2	Morocco	Africa	1998
H3g1.13	DQ534422	Rabat/33/97	Human	H3	N2	Morocco	Africa	1997
H3g1.13	DQ534423	Rabat/236/98	Human	H3	N2	Morocco	Africa	1998
H3g1.13	DQ534424	Marrakech/90/98	Human	H3	N2	Morocco	Africa	1998
H3g1.13	DQ534427	Fes/273/98	Human	H3	N2	Morocco	Africa	1998
H3g1.13	DQ534428	Marrakech/116/98	Human	H3	N2	Morocco	Africa	1998
H3g1.13	DQ534426	Rabat/227/98	Human	H3	N2	Morocco	Africa	1998
H3g1.13	DQ534429	Casa/78/98	Human	H3	N2	Morocco	Africa	1998
H3g1.13	DQ923506	swine/Korea/PZ72-1/2006	Swine	H3	N1	SouthKorea	Asia	2006
H3g1.13	DQ923507	swine/Korea/CN22/2006	Swine	H3	N1	SouthKorea	Asia	2006
H3g1.13	EU296619	swine/Ratchaburi/NIAH9426/2005	Swine	H3	N2	Thailand	Asia	2005
H3g1.13	FJ561060	swine/Thailand/KU5.1/2004	Swine	H3	N2	Thailand	Asia	2004
H3g1.13	AB434376	swine/Ratchaburi/NIAH874/2005	Swine	H3	N2	Thailand	Asia	2005
H3g1.13	EU296617	swine/Ratchaburi/NIAH874/2005	Swine	H3	N2	Thailand	Asia	2005
H3g1.13	AB434368	swine/Ratchaburi/NIAH59/2004	Swine	H3	N2	Thailand	Asia	2004
H3g1.13	EU798790	swine/Korea/CAN04/2005	Swine	H3	N2	SouthKorea	Asia	2005
H3g1.13	EU798791	swine/Korea/CAS07/2005	Swine	H3	N2	SouthKorea	Asia	2005
H3g1.13	EU798792	swine/Korea/CAS09/2006	Swine	H3	N2	SouthKorea	Asia	2006
H3g1.13	EU798796	swine/Korea/CY09/2007	Swine	H3	N2	SouthKorea	Asia	2007
H3g1.13	EU798793	swine/Korea/CY04/2007	Swine	H3	N2	SouthKorea	Asia	2007
H3g1.13	EU798794	swine/Korea/CY05/2007	Swine	H3	N2	SouthKorea	Asia	2007
H3g1.13	EU798795	swine/Korea/CY07/2007	Swine	H3	N2	SouthKorea	Asia	2007
H3g1.13	EU798797	swine/Korea/CY10/2007	Swine	H3	N2	SouthKorea	Asia	2007
H3g1.13	EU301209	swine/Korea/JNS06/2004	Swine	H3	N2	SouthKorea	Asia	2004
H3g1.13	AF525218	Guangdong/01/95	Human	H3	N2	China	Asia	1995
H3g1.13	AF180630	Bangkok/1/97	Human	H3	N2	Thailand	Asia	1997
H3g1.13	EU856931	HongKong/CUHK22736/1997	Human	H3	N2	HongKong	Asia	1997
H3g1.13	EU856901	HongKong/CUHK20731/1997	Human	H3	N2	HongKong	Asia	1997
H3g1.13	EU856921	HongKong/CUHK22048/1997	Human	H3	N2	HongKong	Asia	1997
H3g1.13	EU856927	HongKong/CUHK22185/1997	Human	H3	N2	HongKong	Asia	1997
H3g1.13	EU856891	HongKong/CUHK20199/1997	Human	H3	N2	HongKong	Asia	1997
H3g1.13	AY661203	HongKong/280/97	Human	H3	N2	HongKong	Asia	1997
H3g1.13	EU856895	HongKong/CUHK20236/1997	Human	H3	N2	HongKong	Asia	1997
H3g1.13	EU856902	HongKong/CUHK20992/1997	Human	H3	N2	HongKong	Asia	1997
H3g1.13	EU856920	HongKong/CUHK22013/1997	Human	H3	N2	HongKong	Asia	1997
H3g1.13	EU856894	HongKong/CUHK20217/1997	Human	H3	N2	HongKong	Asia	1997
H3g1.13	EU856899	HongKong/CUHK20320/1997	Human	H3	N2	HongKong	Asia	1997
H3g1.13	EU856850	HongKong/CUHK12794/1997	Human	H3	N2	HongKong	Asia	1997
H3g1.13	EU857014	HongKong/CUHK4529/1997	Human	H3	N2	HongKong	Asia	1997
H3g1.13	EU857016	HongKong/CUHK4622/1997	Human	H3	N2	HongKong	Asia	1997
H3g1.13	EU856846	HongKong/CUHK12566/1997	Human	H3	N2	HongKong	Asia	1997
H3g1.13	EU856888	HongKong/CUHK20010/1997	Human	H3	N2	HongKong	Asia	1997
H3g1.13	EU857012	HongKong/CUHK4391/1997	Human	H3	N2	HongKong	Asia	1997
H3g1.13	EU856849	HongKong/CUHK12626/1997	Human	H3	N2	HongKong	Asia	1997
H3g1.13	EU856845	HongKong/CUHK12563/1997	Human	H3	N2	HongKong	Asia	1997
H3g1.13	EU857015	HongKong/CUHK4542/1997	Human	H3	N2	HongKong	Asia	1997
H3g1.13	EU857017	HongKong/CUHK4803/1997	Human	H3	N2	HongKong	Asia	1997
H3g1.13	AF008705	Shenzhen/43/96	Human	H3	N2	China	Asia	1996
H3g1.13	AF008706	Wuzhou/19/96	Human	H3	N2	China	Asia	1996
H3g1.13	AF180619	Guangdong/1/96	Human	H3	N2	China	Asia	1996
H3g1.13	AF008707	Guangzhou/6/96	Human	H3	N2	China	Asia	1996
H3g1.13	AY661193	Hongkong/20/96	Human	H3	N2	HongKong	Asia	1996
H3g1.13	AF525686	Guangdong/08/96	Human	H3	N2	China	Asia	1996
H3g1.13	AF525799	Guangdong/07/96	Human	H3	N2	China	Asia	1996
H3g1.13	EU857004	HongKong/CUHK4147/1997	Human	H3	N2	HongKong	Asia	1997
H3g1.13	AY661202	Hongkong/1/97	Human	H3	N2	HongKong	Asia	1997
H3g1.13	AF180620	Thailand/79/97	Human	H3	N2	Thailand	Asia	1997
H3g1.13	AF180621	Thailand/78/97	Human	H3	N2	Thailand	Asia	1997
H3g1.13	AF008712	Fukushima/114/96	Human	H3	N2	Japan	Asia	1996
H3g1.13	AF008713	Fukushima/114/96	Human	H3	N2	Japan	Asia	1996
H3g1.13	AF038266	Fukushima/114/96haemagglutininHA1	Human	H3	N2	Japan	Asia	1996
H3g1.13	AF180622	Yokohama/68/96	Human	H3	N2	Japan	Asia	1996
H3g1.13	AF180628	Nanchang/813/95	Human	H3	N2	China	Asia	1995
H3g1.13	AF008728	Shanghai/9/95	Human	H3	N2	China	Asia	1995
H3g1.13	AF180652	thailand/94/96	Human	H3	N2	Thailand	Asia	1996
H3g1.13	AF008730	Taiwan/523/96	Human	H3	N2	Taiwan	Asia	1996
H3g1.13	AY661189	Hongkong/55/95	Human	H3	N2	HongKong	Asia	1995
H3g1.13	AY661198	Singapore/1/96	Human	H3	N2	Singapore	Asia	1996
H3g1.13	AY661199	Singapore/1/96	Human	H3	N2	Singapore	Asia	1996
H3g1.13	AY661200	Singapore/1/96	Human	H3	N2	Singapore	Asia	1996
H3g1.13	AF008724	Japan/99/96	Human	H3	N2	Japan	Asia	1996
H3g1.13	AF038267	Niigata/137/96haemagglutininHA1	Human	H3	N2	Japan	Asia	1996
H3g1.13	AF525217	Guangdong/04/96	Human	H3	N2	China	Asia	1996
H3g1.13	AF008726	Fujian/47/96	Human	H3	N2	China	Asia	1996
H3g1.13	AF008725	Nanchang/933/95	Human	H3	N2	China	Asia	1995
H3g1.13	EU501159	KYONGBUK/304/2002	Human	H3	N2	SouthKorea	Asia	2002
H3g1.13	AY377129	Gyeongbuk/2/02	Human	H3	N2	SouthKorea	Asia	2002
H3g1.13	AF008721	CNIC/35/96	Human	H3	N2	China	Asia	1996
H3g1.13	AY138515	zhejiang/10/98	Human	H3	N2	China	Asia	1998
H3g1.13	AY661190	Wuhan/359/95	Human	H3	N2	China	Asia	1995
H3g1.13	AF008722	Wuhan/359/95	Human	H3	N2	China	Asia	1995
H3g1.13	AF038268	Wuhan/359/95haemagglutininHA1	Human	H3	N2	China	Asia	1995
H3g1.13	EU501120	WUHAN/359/1995	Human	H3	N2	China	Asia	1995
H3g1.13	AF008766	Guangxi/42/95	Human	H3	N2	China	Asia	1995
H3g1.13	AF525219	Guangdong/08/95	Human	H3	N2	China	Asia	1995
H3g1.13	AF008765	CNIC/22/95	Human	H3	N2	China	Asia	1995
H3g1.13	AF008762	Beijing/281/94	Human	H3	N2	China	Asia	1994
H3g1.13	AY661185	Hongkong/32/95	Human	H3	N2	HongKong	Asia	1995
H3g1.13	AY661187	Hongkong/49/95	Human	H3	N2	HongKong	Asia	1995
H3g1.13	AF008763	Shangdong/5/94	Human	H3	N2	China	Asia	1994
H3g1.13	AF180631	Guangzhou/66/97	Human	H3	N2	China	Asia	1997
H3g1.13	AB019357	Nagasaki/97/95	Human	H3	N2	Japan	Asia	1995
H3g1.13	AF008736	Korea/45/96	Human	H3	N2	SouthKorea	Asia	1996
H3g1.13	AB019354	Nagasaki/48/95	Human	H3	N2	Japan	Asia	1995
H3g1.13	U65557	Shiga/20/95haemagglutininprecursorHA1	Human	H3	N2	Japan	Asia	1995
H3g1.13	AF008758	Singapore/28/95	Human	H3	N2	Singapore	Asia	1995
H3g1.13	AF008755	Hong_Kong/3/95	Human	H3	N2	HongKong	Asia	1995
H3g1.13	U48445	Sendai/c373/1995	Human	H3	N2	Japan	Asia	1995
H3g1.13	U48444	Akita/1/1995	Human	H3	N2	Japan	Asia	1995
H3g1.13	AF008756	Singapore/27/95	Human	H3	N2	Singapore	Asia	1995
H3g1.13	U65554	Tochigi/44/95haemagglutininprecursorHA1	Human	H3	N2	Japan	Asia	1995
H3g1.13	U65556	Kagoshima/10/95haemagglutininprecursorHA1	Human	H3	N2	Japan	Asia	1995
H3g1.13	U65552	Saga/447/94haemagglutininprecursorHA1	Human	H3	N2	Japan	Asia	1994
H3g1.13	U65555	Gifu/2/95haemagglutininprecursorHA1	Human	H3	N2	Japan	Asia	1995
H3g1.13	U65559	Niigata/124/95haemagglutininprecursorHA1	Human	H3	N2	Japan	Asia	1995
H3g1.13	U48446	Aichi/69/1994	Human	H3	N2	Japan	Asia	1994
H3g1.13	AF008749	Kwangju/1/95	Human	H3	N2	SouthKorea	Asia	1995
H3g1.13	AF008751	Changwon/9/95	Human	H3	N2	SouthKorea	Asia	1995
H3g1.13	AY661186	Hongkong/38/95	Human	H3	N2	HongKong	Asia	1995
H3g1.13	AF008759	Hong_Kong/38/95	Human	H3	N2	HongKong	Asia	1995
H3g1.13	U65553	Osaka/c1/95haemagglutininprecursorHA1	Human	H3	N2	Japan	Asia	1995
H3g1.13	U65560	Miyagi/29/95haemagglutininprecursorHA1	Human	H3	N2	Japan	Asia	1995
H3g1.13	U65558	Ibaraki/1/95haemagglutininprecursorHA1	Human	H3	N2	Japan	Asia	1995
H3g1.13	U48447	Hebei/19/1995	Human	H3	N2	China	Asia	1995
H3g1.13	U48441	Hebei/41/1994	Human	H3	N2	China	Asia	1994
H3g1.13	AF386618	Kwangju/1/97	Human	H3	N2	SouthKorea	Asia	1997
H3g1.13	AF180585	Harbin/3/96	Human	H3	N2	China	Asia	1996
H3g1.13	AF180586	Beijing/244/96	Human	H3	N2	China	Asia	1996
H3g1.13	AF038270	Shiga/25/97haemagglutininHA1	Human	H3	N2	Japan	Asia	1997
H3g1.13	AF180598	Japan/416/97	Human	H3	N2	Japan	Asia	1997
H3g1.13	AF180595	Korea/679/97	Human	H3	N2	SouthKorea	Asia	1997
H3g1.13	AF180596	Korea/572/97	Human	H3	N2	SouthKorea	Asia	1997
H3g1.13	AF180597	Korea/671/97	Human	H3	N2	SouthKorea	Asia	1997
H3g1.13	EU856893	HongKong/CUHK20213/1997	Human	H3	N2	HongKong	Asia	1997
H3g1.13	AF180588	Guanxi/189/96	Human	H3	N2	China	Asia	1996
H3g1.13	AF386619	Kwangju/4/97	Human	H3	N2	SouthKorea	Asia	1997
H3g1.13	EU856900	HongKong/CUHK20523/1997	Human	H3	N2	HongKong	Asia	1997
H3g1.13	AF180607	Shenzhen/157/96	Human	H3	N2	China	Asia	1996
H3g1.13	EU857008	HongKong/CUHK4245/1997	Human	H3	N2	HongKong	Asia	1997
H3g1.13	AF008711	Hong_Kong/357/96	Human	H3	N2	HongKong	Asia	1996
H3g1.13	AF008710	Guangzhou/8/96	Human	H3	N2	China	Asia	1996
H3g1.13	AF008709	Guangzhou/11/96	Human	H3	N2	China	Asia	1996
H3g1.13	AF180604	Tianjing/55/96	Human	H3	N2	China	Asia	1996
H3g1.13	AF180601	Tianjing/51/97	Human	H3	N2	China	Asia	1997
H3g1.13	AF180600	Shangdong/9/96	Human	H3	N2	China	Asia	1996
H3g1.13	AF180602	HongKong/358/96	Human	H3	N2	HongKong	Asia	1996
H3g1.13	AF180603	Fujian/133/96	Human	H3	N2	China	Asia	1996
H3g1.13	AF180610	Saitama/80/96	Human	H3	N2	Japan	Asia	1996
H3g1.13	AF038269	Fukushima/140/96haemagglutininHA1region	Human	H3	N2	Japan	Asia	1996
H3g1.13	EU856839	HongKong/CUHK12160/1997	Human	H3	N2	HongKong	Asia	1997
H3g1.13	AF180608	Beijing/62/97	Human	H3	N2	China	Asia	1997
H3g1.13	AF180609	Beijing/17/97	Human	H3	N2	China	Asia	1997
H3g1.13	AF225542	sw/Shizuoka/110/97	Swine	H3	N2	Japan	Asia	1997
H3g1.13	AF225543	sw/Shizuoka/115/97	Swine	H3	N2	Japan	Asia	1997
H3g1.13	AF225544	sw/Shizuoka/119/97	Swine	H3	N2	Japan	Asia	1997
H3g1.13	AF225545	sw/Shizuoka/120/97	Swine	H3	N2	Japan	Asia	1997
H3g1.13	AF180614	Russia/41/97	Human	H3	N2	Russia	Europe	1997
H3g1.13	AF092064	Netherlands/172/96)hemagglutinin	Human	H3	N2	Netherlands	Europe	1996
H3g1.13	AF180589	Cordoba/3278/96	Human	H3	N2	Spain	Europe	1996
H3g1.13	AF315568	Athens/2/97	Human	H3	N2	Greece	Europe	1997
H3g1.13	CY036847	Siena/1/1997	Human	H3	N2	Italy	Europe	1997
H3g1.13	AF180611	Spain/214/97	Human	H3	N2	Spain	Europe	1997
H3g1.13	AF315570	Athens/23/97	Human	H3	N2	Greece	Europe	1997
H3g1.13	AF315571	Athens/1/98	Human	H3	N2	Greece	Europe	1998
H3g1.13	AF316817	Athens/2/98	Human	H3	N2	Greece	Europe	1998
H3g1.13	AF017271	Vienna/81/96V	Human	H3	N2	Austria	Europe	1996
H3g1.13	AY661191	Netherlands/271/95	Human	H3	N2	Netherlands	Europe	1995
H3g1.13	CY038503	Siena/3/1995	Human	H3	N2	Italy	Europe	1995
H3g1.13	AY661192	Lyon/2279/95	Human	H3	N2	France	Europe	1995
H3g1.13	AF017270	Vienna/47/96M	Human	H3	N2	Austria	Europe	1996
H3g1.13	AF017272	Vienna/47/96V	Human	H3	N2	Austria	Europe	1996
H3g1.13	AF008739	United_Kingdom/897/96	Human	H3	N2	UnitedKingdom	Europe	1996
H3g1.13	AF368437	Finland/435/96	Human	H3	N2	Finland	Europe	1996
H3g1.13	EF456791	England/286/1995	Human	H3	N2	UnitedKingdom	Europe	1995
H3g1.13	L75990	Finland/363/1995	Human	H3	N2	Finland	Europe	1995
H3g1.13	AY377547	Finland/364/95	Human	H3	N2	Finland	Europe	1995
H3g1.13	AY661184	Finland/339/95	Human	H3	N2	Finland	Europe	1995
H3g1.13	L75989	Finland/339/1995	Human	H3	N2	Finland	Europe	1995
H3g1.13	AY661196	Finland/381/95	Human	H3	N2	Finland	Europe	1995
H3g1.13	EF456786	England/255/1995	Human	H3	N2	UnitedKingdom	Europe	1995
H3g1.13	AF311677	Finland/380/95	Human	H3	N2	Finland	Europe	1995
H3g1.13	AF008737	Germany/491/96	Human	H3	N2	Germany	Europe	1996
H3g1.13	AY661194	Netherlands/91/96	Human	H3	N2	Netherlands	Europe	1996
H3g1.13	L75991	Finland/371/1995	Human	H3	N2	Finland	Europe	1995
H3g1.13	AF368436	Finland/338/95	Human	H3	N2	Finland	Europe	1995
H3g1.13	AY661183	Finland/338/95	Human	H3	N2	Finland	Europe	1995
H3g1.13	AF008752	Germany/578652/95	Human	H3	N2	Germany	Europe	1995
H3g1.13	AF008754	Germany/767/95	Human	H3	N2	Germany	Europe	1995
H3g1.13	AY661182	Geneva/AI9509/95	Human	H3	N2	Switzerland	Europe	1995
H3g1.13	AF315567	Greece/1/97	Human	H3	N2	Greece	Europe	1997
H3g1.13	AF368438	Finland/447/96	Human	H3	N2	Finland	Europe	1996
H3g1.13	AF368439	Finland/460/97	Human	H3	N2	Finland	Europe	1997
H3g1.13	AF368441	Finland/528/97	Human	H3	N2	Finland	Europe	1997
H3g1.13	AF368442	Finland/529/97	Human	H3	N2	Finland	Europe	1997
H3g1.13	AY661210	Nice/491/97	Human	H3	N2	France	Europe	1997
H3g1.13	AF131996	Lyon/1781/96	Human	H3	N2	France	Europe	1996
H3g1.13	AF131997	Lyon/1781/96	Human	H3	N2	France	Europe	1996
H3g1.13	AF131998	Lyon/1781/96	Human	H3	N2	France	Europe	1996
H3g1.13	AF368440	Finland/524/97	Human	H3	N2	Finland	Europe	1997
H3g1.13	AF311679	Finland/571/98	Human	H3	N2	Finland	Europe	1998
H3g1.13	AF315561	Athens/94/98	Human	H3	N2	Greece	Europe	1998
H3g1.13	AY661209	Netherlands/5/98	Human	H3	N2	Netherlands	Europe	1998
H3g1.13	AF311680	Finland/572/98	Human	H3	N2	Finland	Europe	1998
H3g1.13	AF311676	Finland/539/97	Human	H3	N2	Finland	Europe	1997
H3g1.13	AF363503	Paris/906/97	Human	H3	N2	France	Europe	1997
H3g1.13	AF311678	Finland/445/96	Human	H3	N2	Finland	Europe	1996
H3g1.13	AF368443	Finland/532/97	Human	H3	N2	Finland	Europe	1997
H3g1.13	DQ883582	Oslo/99/97	Human	H3	N2	Norway	Europe	1997
H3g1.13	AF363502	Paris/896/97	Human	H3	N2	France	Europe	1997
H3g1.13	EF456782	England/731/1997	Human	H3	N2	UnitedKingdom	Europe	1997
H3g1.13	AF180646	Moscow/2/97	Human	H3	N2	Russia	Europe	1997
H3g1.13	AF368446	Oslo/244/97	Human	H3	N2	Norway	Europe	1997
H3g1.13	AF368444	Oslo/21/97	Human	H3	N2	Norway	Europe	1997
H3g1.13	AF368445	Oslo/185/97	Human	H3	N2	Norway	Europe	1997
H3g1.13	AF180654	France/75/97	Human	H3	N2	France	Europe	1997
H3g1.13	AF363504	Paris/908/97	Human	H3	N2	France	Europe	1997
H3g1.13	AY661195	Geneva/3958/96	Human	H3	N2	Switzerland	Europe	1996
H3g1.13	CY045551	swine/Oklahoma/001142/2009	Swine	H3	N2	USA	NorthAmerica	2009
H3g1.13	CY045559	swine/Kansas/015252/2009	Swine	H3	N2	USA	NorthAmerica	2009
H3g1.13	EU826551	mink/NovaScotia/1055488/2007	Mink	H3	N2	Canada	NorthAmerica	2007
H3g1.13	CY041847	swine/NorthCarolina/R08-001877-D08-013371/2008	Swine	H3	N2	USA	NorthAmerica	2008
H3g1.13	CY045575	swine/Oklahoma/011506/2007	Swine	H3	N2	USA	NorthAmerica	2007
H3g1.13	CY040518	swine/Illinois/34642/2005	Swine	H3	N2	USA	NorthAmerica	2005
H3g1.13	CY045567	swine/Oklahoma/008722/2007	Swine	H3	N2	USA	NorthAmerica	2007
H3g1.13	CY040538	swine/NorthCarolina/38715/2005	Swine	H3	N2	USA	NorthAmerica	2005
H3g1.13	CY035442	swine/Minnesota/SG-00242/2006	Swine	H3	N2	USA	NorthAmerica	2006
H3g1.13	EU399751	Ontario/1252/2007	Human	H3	N2	Canada	NorthAmerica	2007
H3g1.13	CY040516	swine/Iowa/36243/2005	Swine	H3	N2	USA	NorthAmerica	2005
H3g1.13	CY035419	swine/Minnesota/SG-00235/2007	Swine	H3	N2	USA	NorthAmerica	2007
H3g1.13	CY035422	swine/Minnesota/SG-00236/2007	Swine	H3	N2	USA	NorthAmerica	2007
H3g1.13	CY040581	swine/Iowa/36241/2005	Swine	H3	N2	USA	NorthAmerica	2005
H3g1.13	EU735826	turkey/NC/353568/2005	Avian	H3	N2	USA	NorthAmerica	2005
H3g1.13	EU697209	turkey/NorthCarolina/353568/2005	Avian	H3	N2	USA	NorthAmerica	2005
H3g1.13	EF551045	turkey/Illinois/2004	Avian	H3	N2	USA	NorthAmerica	2004
H3g1.13	CY035416	swine/Minnesota/SG-00234/2005	Swine	H3	N2	USA	NorthAmerica	2005
H3g1.13	DQ150425	swine/MI/PU243/04	Swine	H3	N1	USA	NorthAmerica	2004
H3g1.13	CY040582	swine/Minnesota/18815/2005	Swine	H3	N2	USA	NorthAmerica	2005
H3g1.13	DQ469978	swine/BritishColumbia/28103/2005	Swine	H3	N2	Canada	NorthAmerica	2005
H3g1.13	DQ470002	turkey/Ontario/31232/2005	Avian	H3	N2	Canada	NorthAmerica	2005
H3g1.13	EU826543	swine/Quebec/4001/2005	Swine	H3	N2	Canada	NorthAmerica	2005
H3g1.13	EU697204	turkey/Minnesota/366767/2005	Avian	H3	N2	USA	NorthAmerica	2005
H3g1.13	EU743210	turkey/MN/366767/2005	Avian	H3	N2	USA	NorthAmerica	2005
H3g1.13	DQ335771	turkey/Ohio/313053/04	Avian	H3	N2	USA	NorthAmerica	2004
H3g1.13	EU735818	turkey/OH/313053/2004	Avian	H3	N2	USA	NorthAmerica	2004
H3g1.13	CY040583	swine/Minnesota/21057/2005	Swine	H3	N2	USA	NorthAmerica	2005
H3g1.13	DQ469970	swine/Alberta/14722/2005	Swine	H3	N2	Canada	NorthAmerica	2005
H3g1.13	DQ469986	swine/Manitoba/12707/2005	Swine	H3	N2	Canada	NorthAmerica	2005
H3g1.13	DQ469962	Ontario/RV1273/2005	Human	H3	N2	Canada	NorthAmerica	2005
H3g1.13	DQ469994	swine/Ontario/33853/2005	Swine	H3	N2	Canada	NorthAmerica	2005
H3g1.13	CY040584	swine/Minnesota/24877/2005	Swine	H3	N2	USA	NorthAmerica	2005
H3g1.13	CY035426	swine/Minnesota/SG-00237/2007	Swine	H3	N2	USA	NorthAmerica	2007
H3g1.13	EU422988	swine/Iowa/H03HO7/2003	Swine	H3	N2	USA	NorthAmerica	2003
H3g1.13	DQ150433	swine/IN/PU542/04	Swine	H3	N1	USA	NorthAmerica	2004
H3g1.13	DQ145537	swine/Minnesota/00395/2004	Swine	H3	N1	USA	NorthAmerica	2004
H3g1.13	AY779253	turkey/NorthCarolina/12344/03	Avian	H3	N2	USA	NorthAmerica	2003
H3g1.13	AY779254	turkey/Minnesota/764-2/03	Avian	H3	N2	USA	NorthAmerica	2003
H3g1.13	CY040585	swine/Missouri/36702/2005	Swine	H3	N2	USA	NorthAmerica	2005
H3g1.13	AF153235	Swine/Iowa/8548-1/98)hemagglutiningene	Swine	H3	N2	USA	NorthAmerica	1998
H3g1.13	AF251427	Swine/Minnesota/593/99	Swine	H3	N2	USA	NorthAmerica	1999
H3g1.13	AF251403	Swine/Nebraska/209/98	Swine	H3	N2	USA	NorthAmerica	1998
H3g1.13	AF251411	Swine/Iowa/533/99	Swine	H3	N2	USA	NorthAmerica	1999
H3g1.13	AF251419	Swine/Iowa/569/99	Swine	H3	N2	USA	NorthAmerica	1999
H3g1.13	AF268127	Swine/NorthCarolina/16497/99	Swine	H3	N2	USA	NorthAmerica	1999
H3g1.13	AF153234	Swine/Minnesota/9088-2/98	Swine	H3	N2	USA	NorthAmerica	1998
H3g1.13	AF153233	Swine/Texas/4199-2/98	Swine	H3	N2	USA	NorthAmerica	1998
H3g1.13	CY041871	mallard/SouthDakota/Sg-00127/2007	Avian	H3	N2	USA	NorthAmerica	2007
H3g1.13	CY041855	mallard/SouthDakota/Sg-00125/2007	Avian	H3	N2	USA	NorthAmerica	2007
H3g1.13	CY041863	northernpintail/SouthDakota/Sg-00126/2007	Avian	H3	N2	USA	NorthAmerica	2007
H3g1.13	CY041879	mallard/SouthDakota/Sg-00128/2007	Avian	H3	N2	USA	NorthAmerica	2007
H3g1.13	AF153232	Swine/NorthCarolina/35922/98	Swine	H3	N2	USA	NorthAmerica	1998
H3g1.13	EU422987	swine/Iowa/H02AS8/2002	Swine	H3	N2	USA	NorthAmerica	2002
H3g1.13	EF551053	swine/NorthCarolina/2003	Swine	H3	N2	USA	NorthAmerica	2003
H3g1.13	AF087706	Sydney/05/97-like	Human	H3	N2	Canada	NorthAmerica	1997
H3g1.13	AF087704	Sydney/05/97-like	Human	H3	N2	Canada	NorthAmerica	1998
H3g1.13	AF087703	Sydney/05/97-like	Human	H3	N2	Canada	NorthAmerica	1998
H3g1.13	AF087705	Sydney/05/97-like	Human	H3	N2	Canada	NorthAmerica	1997
H3g1.13	AF180618	Kentucky/2/97	Human	H3	N2	USA	NorthAmerica	1997
H3g1.13	AF180615	Indiana/1/96	Human	H3	N2	USA	NorthAmerica	1996
H3g1.13	CY010020	NewYork/582/1996	Human	H3	N2	USA	NorthAmerica	1996
H3g1.13	AF180616	Colorado/11/96	Human	H3	N2	USA	NorthAmerica	1996
H3g1.13	CY011416	NewYork/571/1996	Human	H3	N2	USA	NorthAmerica	1996
H3g1.13	AF180617	NewJersey/8/96	Human	H3	N2	USA	NorthAmerica	1996
H3g1.13	CY009484	NewYork/569/1997	Human	H3	N2	USA	NorthAmerica	1997
H3g1.13	CY010060	NewYork/596/1996	Human	H3	N2	USA	NorthAmerica	1996
H3g1.13	AF180587	Trinidad/47/96	Human	H3	N2	TrinidadandTobago	NorthAmerica	1996
H3g1.13	AF268124	Swine/Illinois/21587/99	Swine	H3	N2	USA	NorthAmerica	1999
H3g1.13	AF268126	Swine/Wisconsin/14094/99	Swine	H3	N2	USA	NorthAmerica	1999
H3g1.13	AF268123	Swine/Oklahoma/18717/99	Swine	H3	N2	USA	NorthAmerica	1999
H3g1.13	AF268125	Swine/Oklahoma/18089/99	Swine	H3	N2	USA	NorthAmerica	1999
H3g1.13	CY009644	NewYork/558/1997	Human	H3	N2	USA	NorthAmerica	1997
H3g1.13	AF180626	Delaware/4/97	Human	H3	N2	USA	NorthAmerica	1997
H3g1.13	AF180625	Minnesota/1/96	Human	H3	N2	USA	NorthAmerica	1996
H3g1.13	CY009996	NewYork/562/1996	Human	H3	N2	USA	NorthAmerica	1996
H3g1.13	AF008718	Hawaii/2/96	Human	H3	N2	USA	NorthAmerica	1996
H3g1.13	CY009908	NewYork/593/1996	Human	H3	N2	USA	NorthAmerica	1996
H3g1.13	CY009900	NewYork/584/1996	Human	H3	N2	USA	NorthAmerica	1996
H3g1.13	CY009700	NewYork/585/1997	Human	H3	N2	USA	NorthAmerica	1997
H3g1.13	AF180656	RhodeIsland/7/97	Human	H3	N2	USA	NorthAmerica	1997
H3g1.13	AF251395	swine/Ontario/00130/97	Swine	H3	N2	Canada	NorthAmerica	1997
H3g1.13	AF180613	SantaFe/208/96)hemagglutiningene	Human	H3	N2	USA	NorthAmerica	1996
H3g1.13	CY010604	NewYork/561/1996	Human	H3	N2	USA	NorthAmerica	1996
H3g1.13	CY015516	NewYork/601/1996	Human	H3	N2	USA	NorthAmerica	1996
H3g1.13	CY011264	NewYork/559/1996	Human	H3	N2	USA	NorthAmerica	1996
H3g1.13	CY010052	NewYork/595/1996	Human	H3	N2	USA	NorthAmerica	1996
H3g1.13	CY009492	NewYork/570/1996	Human	H3	N2	USA	NorthAmerica	1996
H3g1.13	CY009660	NewYork/568/1996	Human	H3	N2	USA	NorthAmerica	1996
H3g1.13	AF180612	NewYork/55/96	Human	H3	N2	USA	NorthAmerica	1996
H3g1.13	CY010004	NewYork/563/1996	Human	H3	N2	USA	NorthAmerica	1996
H3g1.13	CY009500	NewYork/573/1996	Human	H3	N2	USA	NorthAmerica	1996
H3g1.13	CY010796	NewYork/555/1996	Human	H3	N2	USA	NorthAmerica	1996
H3g1.13	CY012200	NewYork/556/1996	Human	H3	N2	USA	NorthAmerica	1996
H3g1.13	AF180592	Trinidad/51/96	Human	H3	N2	TrinidadandTobago	NorthAmerica	1996
H3g1.13	AF180593	Trinidad/50/96	Human	H3	N2	TrinidadandTobago	NorthAmerica	1996
H3g1.13	CY009732	NewYork/589/1996	Human	H3	N2	USA	NorthAmerica	1996
H3g1.13	CY010028	NewYork/591/1996	Human	H3	N2	USA	NorthAmerica	1996
H3g1.13	CY009748	NewYork/597/1997	Human	H3	N2	USA	NorthAmerica	1997
H3g1.13	CY009724	NewYork/588/1996	Human	H3	N2	USA	NorthAmerica	1996
H3g1.13	CY011136	NewYork/602/1996	Human	H3	N2	USA	NorthAmerica	1996
H3g1.13	CY010596	NewYork/578/1996	Human	H3	N2	USA	NorthAmerica	1996
H3g1.13	CY012208	NewYork/598/1996	Human	H3	N2	USA	NorthAmerica	1996
H3g1.13	CY010612	NewYork/603/1996	Human	H3	N2	USA	NorthAmerica	1996
H3g1.13	AF180594	Texas/11/96	Human	H3	N2	USA	NorthAmerica	1996
H3g1.13	CY010012	NewYork/567/1996	Human	H3	N2	USA	NorthAmerica	1996
H3g1.13	CY011256	NewYork/557/1996	Human	H3	N2	USA	NorthAmerica	1996
H3g1.13	CY011424	NewYork/577/1996	Human	H3	N2	USA	NorthAmerica	1996
H3g1.13	CY009708	NewYork/586/1996	Human	H3	N2	USA	NorthAmerica	1996
H3g1.13	CY012848	NewYork/554/1996	Human	H3	N2	USA	NorthAmerica	1996
H3g1.13	CY011816	NewYork/652/1996	Human	H3	N2	USA	NorthAmerica	1996
H3g1.13	AF180655	Guadeloupe/39/96	Human	H3	N2	Guadeloupe	NorthAmerica	1996
H3g1.13	AF180641	California/10/97	Human	H3	N2	USA	NorthAmerica	1997
H3g1.13	AF180640	Minnesota/1/97	Human	H3	N2	USA	NorthAmerica	1997
H3g1.13	CY009740	NewYork/590/1996	Human	H3	N2	USA	NorthAmerica	1996
H3g1.13	AF180638	NewYork/50/96	Human	H3	N2	USA	NorthAmerica	1996
H3g1.13	AF180639	NewYork/43/96	Human	H3	N2	USA	NorthAmerica	1996
H3g1.13	CY006475	NewYork/518/1998	Human	H3	N2	USA	NorthAmerica	1998
H3g1.13	AF180637	Missouri/10/96	Human	H3	N2	USA	NorthAmerica	1996
H3g1.13	CY009468	NewYork/564/1997	Human	H3	N2	USA	NorthAmerica	1997
H3g1.13	CY009652	NewYork/566/1997	Human	H3	N2	USA	NorthAmerica	1997
H3g1.13	CY009460	NewYork/560/1997	Human	H3	N2	USA	NorthAmerica	1997
H3g1.13	CY009476	NewYork/565/1996	Human	H3	N2	USA	NorthAmerica	1996
H3g1.13	CY009676	NewYork/576/1997	Human	H3	N2	USA	NorthAmerica	1997
H3g1.13	CY009684	NewYork/580/1996	Human	H3	N2	USA	NorthAmerica	1996
H3g1.13	CY010068	NewYork/600/1996	Human	H3	N2	USA	NorthAmerica	1996
H3g1.13	CY010588	NewYork/572/1996	Human	H3	N2	USA	NorthAmerica	1996
H3g1.13	CY009508	NewYork/575/1996	Human	H3	N2	USA	NorthAmerica	1996
H3g1.13	CY010044	NewYork/594/1996	Human	H3	N2	USA	NorthAmerica	1996
H3g1.13	CY009524	NewYork/583/1997	Human	H3	N2	USA	NorthAmerica	1997
H3g1.13	CY009668	NewYork/574/1996	Human	H3	N2	USA	NorthAmerica	1996
H3g1.13	CY011128	NewYork/599/1996	Human	H3	N2	USA	NorthAmerica	1996
H3g1.13	CY009516	NewYork/579/1997	Human	H3	N2	USA	NorthAmerica	1997
H3g1.13	CY009692	NewYork/581/1997	Human	H3	N2	USA	NorthAmerica	1997
H3g1.13	CY009716	NewYork/587/1996	Human	H3	N2	USA	NorthAmerica	1996
H3g1.13	CY006587	NewYork/541/1998	Human	H3	N2	USA	NorthAmerica	1998
H3g1.13	AF180635	Texas/9/96	Human	H3	N2	USA	NorthAmerica	1996
H3g1.13	AF180636	California/13/96	Human	H3	N2	USA	NorthAmerica	1996
H3g1.13	AF180647	Canada/101/97	Human	H3	N2	Canada	NorthAmerica	1997
H3g1.13	AF180645	Missouri/11/96	Human	H3	N2	USA	NorthAmerica	1996
H3g1.13	AF180644	Pennsylvania/2/97	Human	H3	N2	USA	NorthAmerica	1997
H3g1.13	CY010036	NewYork/592/1996	Human	H3	N2	USA	NorthAmerica	1996
H3g1.13	CY039879	NewYork/537/1998	Human	H3	N2	USA	NorthAmerica	1998
H3g1.13	CY039878	NewYork/537/1998	Human	H3	N2	USA	NorthAmerica	1998
H3g1.13	CY039880	NewYork/537/1998	Human	H3	N2	USA	NorthAmerica	1998
H3g1.13	AF008729	Washington/5/96	Human	H3	N2	USA	NorthAmerica	1996
H3g1.13	AF008731	Wisconsin/3/96	Human	H3	N2	USA	NorthAmerica	1996
H3g1.13	AF008723	Alaska/2/96	Human	H3	N2	USA	NorthAmerica	1996
H3g1.13	AF180650	NewYork/37/96	Human	H3	N2	USA	NorthAmerica	1996
H3g1.13	AF008727	New_York/9/96	Human	H3	N2	USA	NorthAmerica	1996
H3g1.13	CY010716	NewYork/631/1996	Human	H3	N2	USA	NorthAmerica	1996
H3g1.13	CY010628	NewYork/608/1996	Human	H3	N2	USA	NorthAmerica	1996
H3g1.13	CY010516	NewYork/617/1996	Human	H3	N2	USA	NorthAmerica	1996
H3g1.13	AF008746	Minnesota/6/95	Human	H3	N2	USA	NorthAmerica	1995
H3g1.13	AF008747	Nevada/1/95	Human	H3	N2	USA	NorthAmerica	1995
H3g1.13	AF180662	Louisiana/5/95	Human	H3	N2	USA	NorthAmerica	1995
H3g1.13	AF180664	Delaware/3/95	Human	H3	N2	USA	NorthAmerica	1995
H3g1.13	AF180663	Florida/4/95	Human	H3	N2	USA	NorthAmerica	1995
H3g1.13	AF008744	Alaska/16/95	Human	H3	N2	USA	NorthAmerica	1995
H3g1.13	AF008738	Canada/17/96	Human	H3	N2	Canada	NorthAmerica	1996
H3g1.13	CY011456	NewYork/636/1996	Human	H3	N2	USA	NorthAmerica	1996
H3g1.13	CY010724	NewYork/634/1995	Human	H3	N2	USA	NorthAmerica	1995
H3g1.13	CY012216	NewYork/639/1995	Human	H3	N2	USA	NorthAmerica	1995
H3g1.13	AF008735	Canada/61/96	Human	H3	N2	Canada	NorthAmerica	1996
H3g1.13	CY011432	NewYork/624/1996	Human	H3	N2	USA	NorthAmerica	1996
H3g1.13	CY011448	NewYork/635/1996	Human	H3	N2	USA	NorthAmerica	1996
H3g1.13	CY011464	NewYork/641/1996	Human	H3	N2	USA	NorthAmerica	1996
H3g1.13	CY010652	NewYork/611/1995	Human	H3	N2	USA	NorthAmerica	1995
H3g1.13	CY010668	NewYork/613/1996	Human	H3	N2	USA	NorthAmerica	1996
H3g1.13	CY010812	NewYork/623/1995	Human	H3	N2	USA	NorthAmerica	1995
H3g1.13	CY010708	NewYork/628/1995	Human	H3	N2	USA	NorthAmerica	1995
H3g1.13	CY010660	NewYork/612/1995	Human	H3	N2	USA	NorthAmerica	1995
H3g1.13	CY010676	NewYork/618/1995	Human	H3	N2	USA	NorthAmerica	1995
H3g1.13	AF008743	Missouri/6/96	Human	H3	N2	USA	NorthAmerica	1996
H3g1.13	AF008742	Canada/27/96	Human	H3	N2	Canada	NorthAmerica	1996
H3g1.13	CY010620	NewYork/606/1995	Human	H3	N2	USA	NorthAmerica	1995
H3g1.13	CY010684	NewYork/619/1996	Human	H3	N2	USA	NorthAmerica	1996
H3g1.13	AF008740	Idaho/3/95	Human	H3	N2	USA	NorthAmerica	1995
H3g1.13	CY010732	NewYork/637/1996	Human	H3	N2	USA	NorthAmerica	1996
H3g1.13	CY010692	NewYork/622/1996	Human	H3	N2	USA	NorthAmerica	1996
H3g1.13	CY010644	NewYork/610/1995	Human	H3	N2	USA	NorthAmerica	1995
H3g1.13	CY010636	NewYork/609/1995	Human	H3	N2	USA	NorthAmerica	1995
H3g1.13	CY011808	NewYork/647/1995	Human	H3	N2	USA	NorthAmerica	1995
H3g1.13	CY010748	NewYork/648/1995	Human	H3	N2	USA	NorthAmerica	1995
H3g1.13	AF008741	Idaho/4/95	Human	H3	N2	USA	NorthAmerica	1995
H3g1.13	AF008767	Virginia/25/94	Human	H3	N2	USA	NorthAmerica	1994
H3g1.13	AF008748	Alaska/10/95	Human	H3	N2	USA	NorthAmerica	1995
H3g1.13	AF008750	Nebraska/11/95	Human	H3	N2	USA	NorthAmerica	1995
H3g1.13	CY017299	NewYork/701/1995	Human	H3	N2	USA	NorthAmerica	1995
H3g1.13	AF008761	Washington/186/94	Human	H3	N2	USA	NorthAmerica	1994
H3g1.13	AF008760	Canada/147/95	Human	H3	N2	Canada	NorthAmerica	1995
H3g1.13	CY011536	NewYork/671/1995	Human	H3	N2	USA	NorthAmerica	1995
H3g1.13	CY013311	NewYork/660/1995	Human	H3	N2	USA	NorthAmerica	1995
H3g1.13	AF008757	New_Jersey/11/94	Human	H3	N2	USA	NorthAmerica	1994
H3g1.13	CY010700	NewYork/625/1996	Human	H3	N2	USA	NorthAmerica	1996
H3g1.13	CY011440	NewYork/632/1996	Human	H3	N2	USA	NorthAmerica	1996
H3g1.13	AF008753	West_Virginia/1/95	Human	H3	N2	USA	NorthAmerica	1995
H3g1.13	CY011320	NewYork/692/1995	Human	H3	N2	USA	NorthAmerica	1995
H3g1.13	CY013319	NewYork/676/1995	Human	H3	N2	USA	NorthAmerica	1995
H3g1.13	CY002272	Memphis/24/95	Human	H3	N2	USA	NorthAmerica	1995
H3g1.13	CY011368	NewYork/703/1995	Human	H3	N2	USA	NorthAmerica	1995
H3g1.13	CY012520	NewYork/700/1995	Human	H3	N2	USA	NorthAmerica	1995
H3g1.13	CY011512	NewYork/662/1995	Human	H3	N2	USA	NorthAmerica	1995
H3g1.13	CY012928	NewYork/699/1995	Human	H3	N2	USA	NorthAmerica	1995
H3g1.13	CY011552	NewYork/674/1995	Human	H3	N2	USA	NorthAmerica	1995
H3g1.13	CY011840	NewYork/687/1995	Human	H3	N2	USA	NorthAmerica	1995
H3g1.13	CY012496	NewYork/668/1995	Human	H3	N2	USA	NorthAmerica	1995
H3g1.13	CY012504	NewYork/678/1995	Human	H3	N2	USA	NorthAmerica	1995
H3g1.13	AY661188	Victoria/75/95	Human	H3	N2	Australia	Oceania	1995
H3g1.13	AF180634	Tasmania/1/97	Human	H3	N2	Australia	Oceania	1997
H3g1.13	AF180633	Victoria/30/97	Human	H3	N2	Australia	Oceania	1997
H3g1.13	AF180632	Victoria/47/97	Human	H3	N2	Australia	Oceania	1997
H3g1.13	AF180653	Guam/1014/96	Human	H3	N2	Guam	Oceania	1996
H3g1.13	AF008719	Wellington/48/96	Human	H3	N2	NewZealand	Oceania	1996
H3g1.13	AY661197	Brisbane/8/96	Human	H3	N2	Australia	Oceania	1996
H3g1.13	AF008716	Brisbane/35/96	Human	H3	N2	Australia	Oceania	1996
H3g1.13	AF008717	Christ_Church/1/96	Human	H3	N2	NewZealand	Oceania	1996
H3g1.13	AF008714	Auckland/5/96	Human	H3	N2	NewZealand	Oceania	1996
H3g1.13	AF008715	Auckland/9/96	Human	H3	N2	NewZealand	Oceania	1996
H3g1.13	AF180629	Auckland/108/96	Human	H3	N2	NewZealand	Oceania	1996
H3g1.13	AF008720	Brisbane/22/96	Human	H3	N2	Australia	Oceania	1996
H3g1.13	AF008734	Brazil/2/95	Human	H3	N2	Brazil	SouthAmerica	1995
H3g1.13	AF534014	BuenosAires/4064/95	Human	H3	N2	Argentina	SouthAmerica	1995
H3g1.13	AF534018	BuenosAires/4102/95	Human	H3	N2	Argentina	SouthAmerica	1995
H3g1.13	AF534015	BuenosAires/4065/95	Human	H3	N2	Argentina	SouthAmerica	1995
H3g1.13	AF534017	BuenosAires/4098/95	Human	H3	N2	Argentina	SouthAmerica	1995
H3g1.13	AF534013	BuenosAires/4057/95	Human	H3	N2	Argentina	SouthAmerica	1995
H3g1.13	AF534016	BuenosAires/4084/95	Human	H3	N2	Argentina	SouthAmerica	1995
H3g1.13	AF008764	Argentina/4057/95	Human	H3	N2	Argentina	SouthAmerica	1995
H3g1.13	AF534022	BuenosAires/4634/96	Human	H3	N2	Argentina	SouthAmerica	1996
H3g1.13	AF180661	Brazil/597/96	Human	H3	N2	Brazil	SouthAmerica	1996
H3g1.13	AF008732	Brazil/18/96	Human	H3	N2	Brazil	SouthAmerica	1996
H3g1.13	AF180660	Brazil/184/96	Human	H3	N2	Brazil	SouthAmerica	1996
H3g1.13	AF180659	Brazil/45/96	Human	H3	N2	Brazil	SouthAmerica	1996
H3g1.13	AF008733	Brazil/8/96	Human	H3	N2	Brazil	SouthAmerica	1996
H3g1.13	AF180657	Brazil/87/96	Human	H3	N2	Brazil	SouthAmerica	1996
H3g1.13	AF180658	Brazil/3/96	Human	H3	N2	Brazil	SouthAmerica	1996
H3g1.13	AF180590	Argentina/601/96	Human	H3	N2	Argentina	SouthAmerica	1996
H3g1.13	AF180591	Argentina/207/96	Human	H3	N2	Argentina	SouthAmerica	1996
H3g1.13	AF180599	Colombia/170/96	Human	H3	N2	Colombia	SouthAmerica	1996
H3g1.13	AF534021	BuenosAires/4559/96	Human	H3	N2	Argentina	SouthAmerica	1996
H3g1.13	AF008708	Chile/2115/96	Human	H3	N2	Chile	SouthAmerica	1996
H3g1.13	AF534020	BuenosAires/4534/96	Human	H3	N2	Argentina	SouthAmerica	1996
H3g1.13	AF180606	Argentina/39/96	Human	H3	N2	Argentina	SouthAmerica	1996
H3g1.13	AF534019	BuenosAires/4459/96	Human	H3	N2	Argentina	SouthAmerica	1996
H3g1.13	AF534024	BuenosAires/32/96	Human	H3	N2	Argentina	SouthAmerica	1996
H3g1.13	AF534023	BuenosAires/37/96	Human	H3	N2	Argentina	SouthAmerica	1996
H3g1.13	AF180651	Brazil/309/96	Human	H3	N2	Brazil	SouthAmerica	1996
H3g1.13	AF180648	Brazil/51/97	Human	H3	N2	Brazil	SouthAmerica	1997
H3g1.13	AF180649	Brazil/43/97	Human	H3	N2	Brazil	SouthAmerica	1997
H3g1.13	AF180627	Montevideo/318/96	Human	H3	N2	Uruguay	SouthAmerica	1996
H3g1.13	AF180623	Caracas/422/97	Human	H3	N2	Venezuela	SouthAmerica	1997
H3g1.13	AF180624	Caracas/465/96	Human	H3	N2	Venezuela	SouthAmerica	1996
H3g1.14.1	EF462558	SouthAfrica/8/98	Human	H3	N2	SouthAfrica	Africa	1998
H3g1.14.1	EF462559	SouthAfrica/21/98	Human	H3	N2	SouthAfrica	Africa	1998
H3g1.14.1	EF462560	SouthAfrica/56/98	Human	H3	N2	SouthAfrica	Africa	1998
H3g1.14.1	EF566086	johannesburg/3/98	Human	H3	N2	SouthAfrica	Africa	1998
H3g1.14.1	AF180575	HongKong/387/97	Human	H3	N2	HongKong	Asia	1997
H3g1.14.1	EU655692	swine/Sichuan/01/2006	Swine	H3	N2	China	Asia	2006
H3g1.14.1	EU620723	swine/Guangdong/02/2005	Swine	H3	N2	China	Asia	2005
H3g1.14.1	AY852277	swine/Guangdong/6/2004	Swine	H3	N2	China	Asia	2004
H3g1.14.1	EU116040	Swine/Shandong/3/2005	Swine	H3	N2	China	Asia	2005
H3g1.14.1	EF217406	swine/Henan/S4/2001	Swine	H3	N2	China	Asia	2001
H3g1.14.1	FJ970919	swine/Guangdong/Z5/2003	Swine	H3	N2	China	Asia	2003
H3g1.14.1	EF455562	Swine/Guangdong/01/2005	Swine	H3	N2	China	Asia	2005
H3g1.14.1	AY852273	swine/Guangdong/1/2003	Swine	H3	N2	China	Asia	2003
H3g1.14.1	AY852274	swine/Guangdong/3/2003	Swine	H3	N2	China	Asia	2003
H3g1.14.1	AY852275	swine/Guangdong/4/2003	Swine	H3	N2	China	Asia	2003
H3g1.14.1	AY852276	swine/Guangdong/5/2003	Swine	H3	N2	China	Asia	2003
H3g1.14.1	EU273775	swine/Guangdong/164/06	Swine	H3	N2	China	Asia	2006
H3g1.14.1	EU620739	swine/Guangdong/04/2005	Swine	H3	N2	China	Asia	2005
H3g1.14.1	EU273776	swine/Guangdong/165/06	Swine	H3	N2	China	Asia	2006
H3g1.14.1	FJ157986	swine/Guangxi/1/2004	Swine	H3	N2	China	Asia	2004
H3g1.14.1	EU273777	swine/Guangdong/166/06	Swine	H3	N2	China	Asia	2006
H3g1.14.1	EU620731	swine/Guangdong/03/2005	Swine	H3	N2	China	Asia	2005
H3g1.14.1	AY363510	swine/HongKong/7220/00	Swine	H3	N2	HongKong	Asia	2000
H3g1.14.1	AY963794	Zhangzhou/51/1999	Human	H3	N2	China	Asia	1999
H3g1.14.1	AY963795	Fujian/134/1999	Human	H3	N2	China	Asia	1999
H3g1.14.1	AY963782	Fujian/137/1999	Human	H3	N2	China	Asia	1999
H3g1.14.1	AF255020	CNIC/52/98	Human	H3	N2	China	Asia	1998
H3g1.14.1	EU856973	HongKong/CUHK32796/1999	Human	H3	N2	HongKong	Asia	1999
H3g1.14.1	EU856969	HongKong/CUHK31421/1999	Human	H3	N2	HongKong	Asia	1999
H3g1.14.1	EU856970	HongKong/CUHK31448/1999	Human	H3	N2	HongKong	Asia	1999
H3g1.14.1	EU856972	HongKong/CUHK31510/1999	Human	H3	N2	HongKong	Asia	1999
H3g1.14.1	EU856851	HongKong/CUHK12897/1999	Human	H3	N2	HongKong	Asia	1999
H3g1.14.1	AF382324	HongKong/1179/99	Human	H3	N2	HongKong	Asia	1999
H3g1.14.1	AY035590	HongKong/1179/99	Human	H3	N2	HongKong	Asia	1999
H3g1.14.1	AF382323	HongKong/1179/99	Human	H3	N2	HongKong	Asia	1999
H3g1.14.1	AY363509	swine/HongKong/4361/99	Swine	H3	N2	HongKong	Asia	1999
H3g1.14.1	EU856817	HongKong/CUHK10133/1999	Human	H3	N2	HongKong	Asia	1999
H3g1.14.1	AF382325	HongKong/1180/99	Human	H3	N2	HongKong	Asia	1999
H3g1.14.1	AF382326	HongKong/1180/99	Human	H3	N2	HongKong	Asia	1999
H3g1.14.1	AF382327	HongKong/1182/99	Human	H3	N2	HongKong	Asia	1999
H3g1.14.1	AF382328	HongKong/1182/99	Human	H3	N2	HongKong	Asia	1999
H3g1.14.1	AY035591	HongKong/1180/99	Human	H3	N2	HongKong	Asia	1999
H3g1.14.1	AY035592	HongKong/1182/99	Human	H3	N2	HongKong	Asia	1999
H3g1.14.1	AF382322	HongKong/1144/99	Human	H3	N2	HongKong	Asia	1999
H3g1.14.1	AY035589	HongKong/1144/99	Human	H3	N2	HongKong	Asia	1999
H3g1.14.1	AF382321	HongKong/1144/99	Human	H3	N2	HongKong	Asia	1999
H3g1.14.1	EU856836	HongKong/CUHK11255/1999	Human	H3	N2	HongKong	Asia	1999
H3g1.14.1	AY138513	zhejiang/06/99	Human	H3	N2	China	Asia	1999
H3g1.14.1	EU856965	HongKong/CUHK30314/1999	Human	H3	N2	HongKong	Asia	1999
H3g1.14.1	AF255019	CNIC/3/98	Human	H3	N2	China	Asia	1998
H3g1.14.1	AF255025	CNIC/125/98	Human	H3	N2	China	Asia	1998
H3g1.14.1	AF255026	CNIC/130/98	Human	H3	N2	China	Asia	1998
H3g1.14.1	AF255027	CNIC/145/98	Human	H3	N2	China	Asia	1998
H3g1.14.1	EU856848	HongKong/CUHK12580/1999	Human	H3	N2	HongKong	Asia	1999
H3g1.14.1	EU856868	HongKong/CUHK14672/1999	Human	H3	N2	HongKong	Asia	1999
H3g1.14.1	EU856966	HongKong/CUHK30419/1999	Human	H3	N2	HongKong	Asia	1999
H3g1.14.1	EU856867	HongKong/CUHK14627/1999	Human	H3	N2	HongKong	Asia	1999
H3g1.14.1	EU856840	HongKong/CUHK12312/1999	Human	H3	N2	HongKong	Asia	1999
H3g1.14.1	EU856818	HongKong/CUHK10151/1999	Human	H3	N2	HongKong	Asia	1999
H3g1.14.1	EU856866	HongKong/CUHK13763/1999	Human	H3	N2	HongKong	Asia	1999
H3g1.14.1	EU856869	HongKong/CUHK14875/1999	Human	H3	N2	HongKong	Asia	1999
H3g1.14.1	EU856833	HongKong/CUHK11230/1999	Human	H3	N2	HongKong	Asia	1999
H3g1.14.1	EU856834	HongKong/CUHK11237/1999	Human	H3	N2	HongKong	Asia	1999
H3g1.14.1	EU856847	HongKong/CUHK12572/1999	Human	H3	N2	HongKong	Asia	1999
H3g1.14.1	EU856816	HongKong/CUHK10132/1999	Human	H3	N2	HongKong	Asia	1999
H3g1.14.1	EU856967	HongKong/CUHK30423/1999	Human	H3	N2	HongKong	Asia	1999
H3g1.14.1	EU856835	HongKong/CUHK11241/1999	Human	H3	N2	HongKong	Asia	1999
H3g1.14.1	EU856832	HongKong/CUHK11163/1999	Human	H3	N2	HongKong	Asia	1999
H3g1.14.1	AF255021	CNIC/96/98	Human	H3	N2	China	Asia	1998
H3g1.14.1	AF255022	CNIC/97/98	Human	H3	N2	China	Asia	1998
H3g1.14.1	AF255023	CNIC/109/98	Human	H3	N2	China	Asia	1998
H3g1.14.1	AF255024	CNIC/121/98	Human	H3	N2	China	Asia	1998
H3g1.14.1	AF255029	CNIC/149/98	Human	H3	N2	China	Asia	1998
H3g1.14.1	AF382319	HongKong/1143/99	Human	H3	N2	HongKong	Asia	1999
H3g1.14.1	AF382320	HongKong/1143/99	Human	H3	N2	HongKong	Asia	1999
H3g1.14.1	AY035588	HongKong/1143/99	Human	H3	N2	HongKong	Asia	1999
H3g1.14.1	EU856968	HongKong/CUHK30605/1999	Human	H3	N2	HongKong	Asia	1999
H3g1.14.1	EF566081	Tehran/83/99	Human	H3	N2	Iran	Asia	1999
H3g1.14.1	EU856878	HongKong/CUHK17872/1998	Human	H3	N2	HongKong	Asia	1998
H3g1.14.1	AB019355	Nagasaki/76/98	Human	H3	N2	Japan	Asia	1998
H3g1.14.1	EU856877	HongKong/CUHK17707/1998	Human	H3	N2	HongKong	Asia	1998
H3g1.14.1	EU856815	HongKong/CUHK10100/1999	Human	H3	N2	HongKong	Asia	1999
H3g1.14.1	AF255028	CNIC/146/98	Human	H3	N2	China	Asia	1998
H3g1.14.1	AF386631	Kwangju/115/99	Human	H3	N2	SouthKorea	Asia	1999
H3g1.14.1	AF386632	Kwangju/117/99	Human	H3	N2	SouthKorea	Asia	1999
H3g1.14.1	AF400754	Swine/HongKong/2429/98	Swine	H3	N2	HongKong	Asia	1998
H3g1.14.1	EU856884	HongKong/CUHK18358/1998	Human	H3	N2	HongKong	Asia	1998
H3g1.14.1	AF386624	Kyounggi/102/97	Human	H3	N2	SouthKorea	Asia	1997
H3g1.14.1	EU856874	HongKong/CUHK17643/1998	Human	H3	N2	HongKong	Asia	1998
H3g1.14.1	EU856873	HongKong/CUHK17603/1998	Human	H3	N2	HongKong	Asia	1998
H3g1.14.1	EU856881	HongKong/CUHK18218/1998	Human	H3	N2	HongKong	Asia	1998
H3g1.14.1	EU857001	HongKong/CUHK41114/1997	Human	H3	N2	HongKong	Asia	1997
H3g1.14.1	EU857005	HongKong/CUHK41507/1997	Human	H3	N2	HongKong	Asia	1997
H3g1.14.1	EU857003	HongKong/CUHK41459/1997	Human	H3	N2	HongKong	Asia	1997
H3g1.14.1	AF386623	Daegu/84/97	Human	H3	N2	SouthKorea	Asia	1997
H3g1.14.1	AF400752	Swine/HongKong/2405/98	Swine	H3	N2	HongKong	Asia	1998
H3g1.14.1	EU857022	HongKong/CUHK50552/1998	Human	H3	N2	HongKong	Asia	1998
H3g1.14.1	AF386630	Kwangju/105/99	Human	H3	N2	SouthKorea	Asia	1999
H3g1.14.1	AF386628	Pusan/68/98	Human	H3	N2	SouthKorea	Asia	1998
H3g1.14.1	AF386629	Seoul/95/98	Human	H3	N2	SouthKorea	Asia	1998
H3g1.14.1	AF386633	Pusan/71/99	Human	H3	N2	SouthKorea	Asia	1999
H3g1.14.1	AF386634	Inchon/81/99	Human	H3	N2	SouthKorea	Asia	1999
H3g1.14.1	DQ174263	Zhejiang/18/98	Human	H3	N2	China	Asia	1998
H3g1.14.1	EU856871	HongKong/CUHK16614/1998	Human	H3	N2	HongKong	Asia	1998
H3g1.14.1	EU856872	HongKong/CUHK17464/1998	Human	H3	N2	HongKong	Asia	1998
[truncated: 6,662 more rows]

## Sheet: H4
H4g1.1	CY005946	redheadduck/ALB/74/1977	Avian	H4	N6	Canada	NorthAmerica	1977
H4g1.1	CY014579	mallardduck/Alberta/299/1977	Avian	H4	N4	Canada	NorthAmerica	1977
H4g1.1	CY005948	mallard/Alberta/300/1977	Avian	H4	N3	Canada	NorthAmerica	1977
H4g1.1	CY005944	canvasbackduck/ALB/274/1977	Avian	H4	N6	Canada	NorthAmerica	1977
H4g1.1	CY005945	gadwallduck/ALB/53/1977	Avian	H4	N6	Canada	NorthAmerica	1977
H4g1.1	CY005947	blue-wingedteal/ALB/243/1977	Avian	H4	N6	Canada	NorthAmerica	1977
H4g1.2	M25291	seal/Massachussetts/133/1982	Seal	H4	N5	USA	NorthAmerica	1982
H4g1.3	CY005954	mallardduck/ALB/106/1979	Avian	H4	N2	Canada	NorthAmerica	1979
H4g1.3	CY005955	blue-wingedteal/ALB/580/1979	Avian	H4	N2	Canada	NorthAmerica	1979
H4g1.3	CY005956	pintailduck/ALB/599/1979	Avian	H4	N2	Canada	NorthAmerica	1979
H4g1.3	CY005957	mallardduck/ALB/581/1983	Avian	H4	N4	Canada	NorthAmerica	1983
H4g1.3	CY005968	mallardduck/ALB/291/1977	Avian	H4	N1	Canada	NorthAmerica	1977
H4g1.4.1	DQ021848	blue-wingedteal/LA/B182/88	Avian	H4	N6	USA	NorthAmerica	1988
H4g1.4.1	DQ021864	blue-wingedteal/LA/B156/88	Avian	H4	N6	USA	NorthAmerica	1988
H4g1.4.1	CY020981	mallard/Ohio/129/1989	Avian	H4	N6	USA	NorthAmerica	1989
H4g1.4.1	CY021213	mallard/Ohio/178/1990	Avian	H4	N6	USA	NorthAmerica	1990
H4g1.4.1	CY014929	mallardduck/NewYork/194/1982	Avian	H4	N8	USA	NorthAmerica	1982
H4g1.4.1	CY014751	turkey/Minnesota/833/1980	Avian	H4	N2	USA	NorthAmerica	1979
H4g1.4.1	M25290	turkey/Minnesota/833/1980	Avian	H4	N2	USA	NorthAmerica	1980
H4g1.4.2	AY633260	mallard/Alberta/295/98	Avian	H4	N6	Canada	NorthAmerica	1998
H4g1.4.2	DQ021862	guineafowl/NJ/14190-23/96	Avian	H4	N8	USA	NorthAmerica	1996
H4g1.4.2	AF285883	Swine/Ontario/01911-2/99	Swine	H4	N6	Canada	NorthAmerica	1999
H4g1.4.2	AF285885	Swine/Ontario/01911-1/99	Swine	H4	N6	Canada	NorthAmerica	1999
H4g1.4.2	DQ021850	mallard/MN/192/99	Avian	H4	N6	USA	NorthAmerica	1999
H4g1.4.2	DQ021851	mallard/MN/195/99	Avian	H4	N6	USA	NorthAmerica	1999
H4g1.4.2	EU871876	mallard/MN/160/1999	Avian	H4	N6	USA	NorthAmerica	1999
H4g1.4.2	CY045303	Americanblackduck/NewBrunswick/19347/2006	Avian	H4	N6	Canada	NorthAmerica	2006
H4g1.4.2	DQ021861	mallard/MN/530/00	Avian	H4	N6	USA	NorthAmerica	2000
H4g1.4.2	DQ021849	mallard/MN/145/99	Avian	H4	N6	USA	NorthAmerica	1999
H4g1.4.2	DQ021866	mallard/MN/347/99	Avian	H4	N8	USA	NorthAmerica	1999
H4g1.4.2	EU871892	mallard/MN/323/1999	Avian	H4	N8	USA	NorthAmerica	1999
H4g1.4.2	EU871884	mallard/MN/269/1999	Avian	H4	N6	USA	NorthAmerica	1999
H4g1.4.2	DQ021867	mallard/MN/352/99	Avian	H4	N8	USA	NorthAmerica	1999
H4g1.4.2	CY025101	environment/Maryland/1101/2006	Environment	H4	N6	USA	NorthAmerica	2006
H4g1.4.2	CY047584	mallard/Quebec/11002/2006	Avian	H4	N6	Canada	NorthAmerica	2006
H4g1.4.2	CY047624	mallard/Quebec/11106/2006	Avian	H4	N6	Canada	NorthAmerica	2006
H4g1.4.2	CY047616	mallard/Quebec/11103/2006	Avian	H4	N6	Canada	NorthAmerica	2006
H4g1.4.2	FJ877136	mallard/QC/147/2006	Avian	H4	N6	Canada	NorthAmerica	2006
H4g1.4.2	CY047576	mallard/Quebec/11102/2006	Avian	H4	N6	Canada	NorthAmerica	2006
H4g1.4.2	CY038061	redknot/NewJersey/Sg-00479/2008	Avian	H4	N6	USA	NorthAmerica	2008
H4g1.4.2	CY038196	ruddyturnstone/Delaware/Sg-00539/2008	Avian	H4	N6	USA	NorthAmerica	2008
H4g1.4.2	CY038221	ruddyturnstone/NewJersey/Sg-00556/2008	Avian	H4	N6	USA	NorthAmerica	2008
H4g1.4.2	CY038106	ruddyturnstone/NewJersey/Sg-00494/2008	Avian	H4	N6	USA	NorthAmerica	2008
H4g1.4.2	CY038201	ruddyturnstone/NewJersey/Sg-00542/2008	Avian	H4	N6	USA	NorthAmerica	2008
H4g1.4.2	CY038206	ruddyturnstone/NewJersey/Sg-00550/2008	Avian	H4	N6	USA	NorthAmerica	2008
H4g1.4.2	CY042522	ruddyturnstone/NewJersey/Sg-00531/2008	Avian	H4	N6	USA	NorthAmerica	2008
H4g1.4.2	CY038116	ruddyturnstone/NewJersey/Sg-00496/2008	Avian	H4	N6	USA	NorthAmerica	2008
H4g1.4.2	CY038251	ruddyturnstone/NewJersey/Sg-00565/2008	Avian	H4	N6	USA	NorthAmerica	2008
H4g1.4.2	CY038036	ruddyturnstone/Delaware/Sg-00470/2008	Avian	H4	N6	USA	NorthAmerica	2008
H4g1.4.2	CY038041	ruddyturnstone/Delaware/Sg-00474/2008	Avian	H4	N7	USA	NorthAmerica	2008
H4g1.4.2	CY038066	ruddyturnstone/NewJersey/Sg-00480/2008	Avian	H4	N6	USA	NorthAmerica	2008
H4g1.4.2	CY038141	ruddyturnstone/NewJersey/Sg-00506/2008	Avian	H4	N6	USA	NorthAmerica	2008
H4g1.4.2	CY042442	ruddyturnstone/NewJersey/Sg-00492/2008	Avian	H4	N6	USA	NorthAmerica	2008
H4g1.4.2	CY042468	ruddyturnstone/NewJersey/Sg-00510/2008	Avian	H4	N6	USA	NorthAmerica	2008
H4g1.4.2	CY042506	ruddyturnstone/NewJersey/Sg-00524/2008	Avian	H4	N6	USA	NorthAmerica	2008
H4g1.4.2	CY042549	ruddyturnstone/Delaware/Sg-00541/2008	Avian	H4	N6	USA	NorthAmerica	2008
H4g1.4.2	CY038051	ruddyturnstone/NewJersey/Sg-00477/2008	Avian	H4	N6	USA	NorthAmerica	2008
H4g1.4.2	CY038091	ruddyturnstone/NewJersey/Sg-00489/2008	Avian	H4	N6	USA	NorthAmerica	2008
H4g1.4.2	CY038146	ruddyturnstone/NewJersey/Sg-00507/2008	Avian	H4	N6	USA	NorthAmerica	2008
H4g1.4.2	CY038181	ruddyturnstone/NewJersey/Sg-00527/2008	Avian	H4	N6	USA	NorthAmerica	2008
H4g1.4.2	CY038186	ruddyturnstone/NewJersey/Sg-00533/2008	Avian	H4	N6	USA	NorthAmerica	2008
H4g1.4.2	CY038191	ruddyturnstone/NewJersey/Sg-00534/2008	Avian	H4	N6	USA	NorthAmerica	2008
H4g1.4.2	CY038226	ruddyturnstone/NewJersey/Sg-00558/2008	Avian	H4	N6	USA	NorthAmerica	2008
H4g1.4.2	CY042034	mallardduck/Minnesota/Sg-00070/2007	Avian	H4	N8	USA	NorthAmerica	2007
H4g1.4.2	CY042036	mallardduck/Minnesota/Sg-00071/2007	Avian	H4	N8	USA	NorthAmerica	2007
H4g1.4.2	CY042348	blue-wingedteal/Minnesota/Sg-00452/2008	Avian	H4	N2	USA	NorthAmerica	2008
H4g1.4.2	CY045311	Americanblackduck/NewBrunswick/19502/2006	Avian	H4	N6	Canada	NorthAmerica	2006
H4g1.4.2	CY047640	mallard/Quebec/11182/2006	Avian	H4	N6	Canada	NorthAmerica	2006
H4g1.4.2	CY047568	green-wingedteal/NovaScotia/14687/2005	Avian	H4	N6	Canada	NorthAmerica	2005
H4g1.4.2	DQ236166	blue-wingedteal/Barbados/21/04	Avian	H4	N3	Barbados	NorthAmerica	2004
H4g1.4.2	CY021333	mallard/Maryland/1241/2005	Avian	H4	N6	USA	NorthAmerica	2005
H4g1.4.2	CY021349	green-wingedteal/Ohio/1292/2005	Avian	H4	N6	USA	NorthAmerica	2005
H4g1.4.2	CY022605	green-wingedteal/Ohio/1292/2005	Avian	H4	N6	USA	NorthAmerica	2005
H4g1.4.2	CY020749	blue-wingedteal/Ohio/989/2002	Avian	H4	N6	USA	NorthAmerica	2002
H4g1.4.2	CY020725	mallard/Ohio/667/2002	Avian	H4	N6	USA	NorthAmerica	2002
H4g1.4.2	CY020733	mallard/Maryland/750/2002	Avian	H4	N6	USA	NorthAmerica	2002
H4g1.4.2	CY011036	mallard/Ohio/657/2002	Avian	H4	N6	USA	NorthAmerica	2002
H4g1.4.2	CY020773	mallard/Ohio/655/2002	Avian	H4	N6	USA	NorthAmerica	2002
H4g1.4.2	CY020789	mallard/Ohio/668/2002	Avian	H4	N6	USA	NorthAmerica	2002
H4g1.4.2	CY020805	mallard/Ohio/686/2002	Avian	H4	N2	USA	NorthAmerica	2002
H4g1.4.2	CY020797	mallard/Ohio/671/2002	Avian	H4	N6	USA	NorthAmerica	2002
H4g1.4.2	DQ021868	duck/NJ/5406/94	Avian	H4	N0	USA	NorthAmerica	1994
H4g1.4.2	CY004911	mallard/ALB/49/1995	Avian	H4	N6	Canada	NorthAmerica	1995
H4g1.4.2	CY012816	mallard/Ohio/97/1989	Avian	H4	N2	USA	NorthAmerica	1989
H4g1.4.2	CY016148	mallard/Ohio/94/1989	Avian	H4	N2	USA	NorthAmerica	1989
H4g1.4.2	CY015467	mallard/Ohio/83/1986	Avian	H4	N6	USA	NorthAmerica	1986
H4g1.4.2	CY013248	mallard/Ohio/338/1986	Avian	H4	N8	USA	NorthAmerica	1986
H4g1.4.2	DQ021863	mallard/OH/338/86	Avian	H4	N8	USA	NorthAmerica	1986
H4g1.4.2	CY015459	green-wingedteal/Ohio/344/1986	Avian	H4	N2	USA	NorthAmerica	1986
H4g1.4.2	DQ021857	blue-wingedteal/OH/240B/88	Avian	H4	N6	USA	NorthAmerica	1988
H4g1.4.2	DQ021856	blue-wingedteal/LA/166B/88	Avian	H4	N6	USA	NorthAmerica	1988
H4g1.4.2	CY012808	mallard/Ohio/298/1987	Avian	H4	N6	USA	NorthAmerica	1987
H4g1.5.1	AB292406	mallard/Alberta/223/1979	Avian	H4	N2	Canada	NorthAmerica	1979
H4g1.5.2	GU066561	duck/Taiwan/wb787/2005	Avian	H4	N2	Taiwan	Asia	2005
H4g1.5.2	CY042994	blue-wingedteal/NorthDakota/Sg-00716/2008	Avian	H4	N6	USA	NorthAmerica	2008
H4g1.5.2	EU880820	turkey/CA/358533/2005	Avian	H4	N8	USA	NorthAmerica	2005
H4g1.5.2	CY005967	blue-wingedteal/Alberta/293/2003	Avian	H4	N6	Canada	NorthAmerica	2003
H4g1.5.2	CY005966	pintail/Alberta/269/2001	Avian	H4	N6	Canada	NorthAmerica	2001
H4g1.5.2	AY633284	mallard/Alberta/47/98	Avian	H4	N1	Canada	NorthAmerica	1998
H4g1.5.2	AY633156	mallard/Alberta/136/00	Avian	H4	N6	Canada	NorthAmerica	2000
H4g1.5.2	DQ021865	blue-wingedteal/LA/69B/87	Avian	H4	N6	USA	NorthAmerica	1987
H4g1.5.2	CY005962	ruddyturnstone/DE/512/1988	Avian	H4	N6	USA	NorthAmerica	1988
H4g1.5.2	CY017741	pintail/Alaska/310/2005	Avian	H4	N6	USA	NorthAmerica	2005
H4g1.5.2	EU557513	northernpintail/Alaska/44189-069/2006	Avian	H4	N6	USA	NorthAmerica	2006
H4g1.5.2	CY017701	mallard/Ohio/324/1988	Avian	H4	N6	USA	NorthAmerica	1988
H4g1.5.2	CY005959	mallardduck/ALB/630/1984	Avian	H4	N2	Canada	NorthAmerica	1984
H4g1.5.2	CY005965	blue-wingedteal/ALB/293/1994	Avian	H4	N6	Canada	NorthAmerica	1994
H4g1.5.2	CY021893	white-wingedscoter/Maryland/301/2005	Avian	H4	N6	USA	NorthAmerica	2005
H4g1.5.2	CY045351	green-wingedteal/California/K218/2005	Avian	H4	N6	USA	NorthAmerica	2005
H4g1.5.2	CY014562	mallard/Alberta/254/2003	Avian	H4	N6	Canada	NorthAmerica	2003
H4g1.5.2	AY633268	mallard/Alberta/30/98	Avian	H4	N6	Canada	NorthAmerica	1998
H4g1.5.2	DQ021854	mallard/MN/212/99	Avian	H4	N8	USA	NorthAmerica	1999
H4g1.5.2	DQ021859	mallard/MN/33/00	Avian	H4	N0	USA	NorthAmerica	2000
H4g1.5.2	DQ021860	mallard/MN/348/00	Avian	H4	N6	USA	NorthAmerica	2000
H4g1.5.2	DQ021852	mallard/MN/198/99	Avian	H4	N6	USA	NorthAmerica	1999
H4g1.5.2	CY020765	blackduck/Maryland/834/2002	Avian	H4	N8	USA	NorthAmerica	2002
H4g1.5.2	DQ021853	mallard/MN/2/98	Avian	H4	N6	USA	NorthAmerica	1998
H4g1.5.2	DQ021858	mallard/MN/371/98	Avian	H4	N2	USA	NorthAmerica	1998
H4g1.5.2	CY021237	green-wingedteal/Ohio/1324/2005	Avian	H4	N6	USA	NorthAmerica	2005
H4g1.5.2	CY021325	green-wingedteal/Ohio/1324/2005	Avian	H4	N6	USA	NorthAmerica	2005
H4g1.5.2	CY041895	mallard/Minnesota/Sg-00133/2007	Avian	H4	N6	USA	NorthAmerica	2007
H4g1.5.2	CY011056	mallard/Ohio/275/1987	Avian	H4	N2	USA	NorthAmerica	1987
H4g1.5.2	CY005961	pintailduck/ALB/623/1985	Avian	H4	N6	Canada	NorthAmerica	1985
H4g1.5.2	CY005963	blue-wingedteal/ALB/103/1990	Avian	H4	N5	Canada	NorthAmerica	1990
H4g1.5.2	CY005951	mallardduck/ALB/161/1977	Avian	H4	N6	Canada	NorthAmerica	1977
H4g1.5.2	CY005952	pintailduck/ALB/220/1977	Avian	H4	N8	Canada	NorthAmerica	1977
H4g1.5.2	CY005950	mallardduck/ALB/210/1977	Avian	H4	N8	Canada	NorthAmerica	1977
H4g1.5.2	CY005953	mallardduck/ALB/354/1978	Avian	H4	N2	Canada	NorthAmerica	1978
H4g1.5.2	M25287	duck/Alberta/28/1976	Avian	H4	N6	Canada	NorthAmerica	1976
H4g1.5.3	CY014857	mallardduck/NewYork/180/1986	Avian	H4	N9	USA	NorthAmerica	1986
H4g1.5.3	CY014937	pintailduck/NewYork/155/1982	Avian	H4	N3	USA	NorthAmerica	1982
H4g1.5.3	CY014723	domesticduck/Minnesota/1086/1980	Avian	H4	N8	USA	NorthAmerica	1980
H4g1.5.3	CY014922	blue-wingedteal/NewYork/370ac/1979	Avian	H4	N2	USA	NorthAmerica	1979
H4g1.5.3	AB450429	chicken/Alabama/1/1975	Avian	H4	N8	USA	NorthAmerica	1975
H4g1.5.3	M25288	chicken/Alabama/1/1975	Avian	H4	N0	USA	NorthAmerica	1975
H4g1.5.4	CY005964	blue-wingedteal/ALB/136/1990	Avian	H4	N3	Canada	NorthAmerica	1990
H4g1.5.4	CY004847	blue-wingedteal/ALB/562/1985	Avian	H4	N6	Canada	NorthAmerica	1985
H4g1.5.4	CY005958	ruddyturnstone/NJ/47/1985	Avian	H4	N6	USA	NorthAmerica	1985
H4g1.5.4	M25289	ruddyturnstone/NJ/47/1985	Avian	H4	N6	USA	NorthAmerica	1985
H4g1.6	CY004939	mallard/Alberta/30/2001	Avian	H4	N8	Canada	NorthAmerica	2001
H4g1.6	CY047544	redhead/Alberta/11817/2005	Avian	H4	N6	Canada	NorthAmerica	2005
H4g1.6	CY021221	blue-wingedteal/Ohio/1339/2005	Avian	H4	N6	USA	NorthAmerica	2005
H4g1.6	DQ021855	mallard/MN/263/99	Avian	H4	N9	USA	NorthAmerica	1999
H4g1.6	FJ517314	mallard/MN/327/1999	Avian	H4	N8	USA	NorthAmerica	1999
H4g1.6	AY633356	pintail/Alberta/210/99	Avian	H4	N6	Canada	NorthAmerica	1999
H4g1.6	AY633141	mallard/Alberta/119/00	Avian	H4	N6	Canada	NorthAmerica	2000
H4g1.6	CY004925	mallard/ALB/47/1998	Avian	H4	N1	Canada	NorthAmerica	1998
H4g1.6	CY004933	pintail/Alberta/207/1999	Avian	H4	N8	Canada	NorthAmerica	1999
H4g1.6	AY633348	pintail/Alberta/207/99	Avian	H4	N8	Canada	NorthAmerica	1999
H4g1.6	AY633124	mallard/Alberta/111/99	Avian	H4	N6	Canada	NorthAmerica	1999
H4g1.7	CY035257	blue-wingedteal/Texas/Sg-00157/2007	Avian	H4	N6	USA	NorthAmerica	2007
H4g1.7	CY035273	blue-wingedteal/Louisiana/Sg-00163/2007	Avian	H4	N8	USA	NorthAmerica	2007
H4g1.7	CY032908	Americanwigeon/California/HKWF450/2007	Avian	H4	N7	USA	NorthAmerica	2007
H4g1.7	CY035265	blue-wingedteal/Texas/Sg-00159/2007	Avian	H4	N8	USA	NorthAmerica	2007
H4g1.7	CY042974	blue-wingedteal/NorthDakota/Sg-00711/2008	Avian	H4	N8	USA	NorthAmerica	2008
H4g1.7	CY043018	blue-wingedteal/NorthDakota/Sg-00741/2008	Avian	H4	N8	USA	NorthAmerica	2008
H4g1.7	CY034647	blue-wingedteal/Texas/Sg-00077/2007	Avian	H4	N6	USA	NorthAmerica	2007
H4g1.7	CY047688	mallard/Manitoba/23912/2007	Avian	H4	N7	Canada	NorthAmerica	2007
H4g1.7	CY032892	bufflehead/California/HKWF205/2007	Avian	H4	N8	USA	NorthAmerica	2007
H4g1.7	CY034658	blue-wingedteal/Minnesota/Sg-00095/2007	Avian	H4	N6	USA	NorthAmerica	2007
H4g1.7	CY043063	blue-wingedteal/Minnesota/Sg-00799/2008	Avian	H4	N6	USA	NorthAmerica	2008
H4g1.7	CY043043	mallard/Minnesota/Sg-00769/2008	Avian	H4	N6	USA	NorthAmerica	2008
H4g1.7	CY043057	mallard/Minnesota/Sg-00793/2008	Avian	H4	N6	USA	NorthAmerica	2008
H4g1.7	CY038216	ruddyturnstone/NewJersey/Sg-00552/2008	Avian	H4	N6	USA	NorthAmerica	2008
H4g1.7	CY043062	blue-wingedteal/Minnesota/Sg-00798/2008	Avian	H4	N2	USA	NorthAmerica	2008
H4g1.7	CY043073	mallard/Minnesota/Sg-00809/2008	Avian	H4	N6	USA	NorthAmerica	2008
H4g1.7	CY043046	mallard/Minnesota/Sg-00774/2008	Avian	H4	N6	USA	NorthAmerica	2008
H4g1.7	CY043058	mallard/Minnesota/Sg-00794/2008	Avian	H4	N6	USA	NorthAmerica	2008
H4g1.7	CY043012	blue-wingedteal/NorthDakota/Sg-00732/2008	Avian	H4	N6	USA	NorthAmerica	2008
H4g1.7	CY042740	northernshoveler/Minnesota/Sg-00646/2008	Avian	H4	N4	USA	NorthAmerica	2008
H4g1.7	CY042926	mallard/Minnesota/Sg-00695/2008	Avian	H4	N6	USA	NorthAmerica	2008
H4g1.7	CY042744	northernshoveler/Minnesota/Sg-00647/2008	Avian	H4	N6	USA	NorthAmerica	2008
H4g1.7	CY042918	mallard/Minnesota/Sg-00693/2008	Avian	H4	N6	USA	NorthAmerica	2008
H4g1.7	CY042922	mallard/Minnesota/Sg-00694/2008	Avian	H4	N6	USA	NorthAmerica	2008
H4g1.7	CY042934	mallard/Minnesota/Sg-00697/2008	Avian	H4	N6	USA	NorthAmerica	2008
H4g1.7	CY038256	mallard/Minnesota/Sg-00569/2008	Avian	H4	N6	USA	NorthAmerica	2008
H4g1.7	CY043030	blue-wingedteal/NorthDakota/Sg-00754/2008	Avian	H4	N6	USA	NorthAmerica	2008
H4g1.7	CY035324	blue-wingedteal/Texas/Sg-00188/2007	Avian	H4	N8	USA	NorthAmerica	2007
H4g1.7	CY043020	blue-wingedteal/NorthDakota/Sg-00743/2008	Avian	H4	N6	USA	NorthAmerica	2008
H4g1.7	CY043035	mallard/NewJersey/Sg-00760/2008	Avian	H4	N6	USA	NorthAmerica	2008
H4g1.7	CY043037	mallard/NewJersey/Sg-00762/2008	Avian	H4	N6	USA	NorthAmerica	2008
H4g1.7	CY035360	blue-wingedteal/Texas/Sg-00204/2007	Avian	H4	N6	USA	NorthAmerica	2007
H4g1.7	CY043011	blue-wingedteal/NorthDakota/Sg-00731/2008	Avian	H4	N6	USA	NorthAmerica	2008
H4g1.7	CY043031	blue-wingedteal/NorthDakota/Sg-00756/2008	Avian	H4	N6	USA	NorthAmerica	2008
H4g1.7	CY043028	blue-wingedteal/NorthDakota/Sg-00752/2008	Avian	H4	N6	USA	NorthAmerica	2008
H4g1.7	CY043029	blue-wingedteal/NorthDakota/Sg-00753/2008	Avian	H4	N6	USA	NorthAmerica	2008
H4g1.7	CY042950	blue-wingedteal/NorthDakota/Sg-00702/2008	Avian	H4	N6	USA	NorthAmerica	2008
H4g1.7	CY042962	blue-wingedteal/NorthDakota/Sg-00705/2008	Avian	H4	N6	USA	NorthAmerica	2008
H4g1.7	CY042970	blue-wingedteal/NorthDakota/Sg-00708/2008	Avian	H4	N6	USA	NorthAmerica	2008
H4g1.7	CY043021	Americanwigeon/NorthDakota/Sg-00744/2008	Avian	H4	N6	USA	NorthAmerica	2008
H4g1.7	CY043032	blue-wingedteal/NorthDakota/Sg-00757/2008	Avian	H4	N8	USA	NorthAmerica	2008
H4g1.7	CY035371	blue-wingedteal/Texas/Sg-00208/2007	Avian	H4	N6	USA	NorthAmerica	2007
H4g1.7	CY033739	cinnamonteal/Texas/Sg-00088/2007	Avian	H4	N6	USA	NorthAmerica	2007
H4g1.7	CY035451	blue-wingedteal/Texas/Sg-00207/2007	Avian	H4	N6	USA	NorthAmerica	2007
H4g1.7	CY042643	mallard/Minnesota/Sg-00624/2008	Avian	H4	N8	USA	NorthAmerica	2008
H4g1.7	CY042648	mallard/Minnesota/Sg-00625/2008	Avian	H4	N8	USA	NorthAmerica	2008
H4g1.7	CY042399	mallard/Minnesota/Sg-00465/2008	Avian	H4	N8	USA	NorthAmerica	2008
H4g1.7	CY043038	mallard/Minnesota/Sg-00763/2008	Avian	H4	N8	USA	NorthAmerica	2008
H4g1.7	CY043041	mallard/Minnesota/Sg-00767/2008	Avian	H4	N8	USA	NorthAmerica	2008
H4g1.7	CY042910	blue-wingedteal/Minnesota/Sg-00691/2008	Avian	H4	N8	USA	NorthAmerica	2008
H4g1.7	CY042942	mallard/Minnesota/Sg-00700/2008	Avian	H4	N8	USA	NorthAmerica	2008
H4g1.7	CY042938	mallard/Minnesota/Sg-00698/2008	Avian	H4	N8	USA	NorthAmerica	2008
H4g1.7	CY042653	mallard/Minnesota/Sg-00626/2008	Avian	H4	N8	USA	NorthAmerica	2008
H4g1.7	CY042675	mallard/Minnesota/Sg-00631/2008	Avian	H4	N8	USA	NorthAmerica	2008
H4g1.7	CY042693	mallard/Minnesota/Sg-00635/2008	Avian	H4	N8	USA	NorthAmerica	2008
H4g1.7	CY033754	mallardduck/Minnesota/Sg-00096/2007	Avian	H4	N6	USA	NorthAmerica	2007
H4g1.7	CY035261	blue-wingedteal/Texas/Sg-00158/2007	Avian	H4	N6	USA	NorthAmerica	2007
H4g1.7	CY042368	mallard/SouthDakota/Sg-00457/2008	Avian	H4	N2	USA	NorthAmerica	2008
H4g1.7	CY043071	mallard/Minnesota/Sg-00807/2008	Avian	H4	N6	USA	NorthAmerica	2008
H4g1.7	CY042990	blue-wingedteal/NorthDakota/Sg-00715/2008	Avian	H4	N6	USA	NorthAmerica	2008
H4g1.7	CY043014	blue-wingedteal/NorthDakota/Sg-00734/2008	Avian	H4	N6	USA	NorthAmerica	2008
H4g1.7	CY033724	blue-wingedteal/Texas/Sg-00080/2007	Avian	H4	N6	USA	NorthAmerica	2007
H4g1.7	CY043064	blue-wingedteal/Minnesota/Sg-00800/2008	Avian	H4	N6	USA	NorthAmerica	2008
H4g1.7	CY035368	blue-wingedteal/Texas/Sg-00206/2007	Avian	H4	N6	USA	NorthAmerica	2007
H4g1.7	CY035303	mallard/Minnesota/Sg-00176/2007	Avian	H4	N6	USA	NorthAmerica	2007
H4g1.7	CY035375	mallard/Minnesota/Sg-00210/2007	Avian	H4	N6	USA	NorthAmerica	2007
H4g1.7	CY043036	mallard/NewJersey/Sg-00761/2008	Avian	H4	N8	USA	NorthAmerica	2008
H4g1.7	CY033684	blue-wingedteal/Minnesota/Sg-00040/2007	Avian	H4	N6	USA	NorthAmerica	2007
H4g1.7	CY034638	mallardduck/Minnesota/Sg-00060/2007	Avian	H4	N6	USA	NorthAmerica	2007
H4g1.7	CY035253	blue-wingedteal/Texas/Sg-00155/2007	Avian	H4	N8	USA	NorthAmerica	2007
H4g1.7	CY042096	blue-wingedteal/Texas/Sg-00124/2007	Avian	H4	N6	USA	NorthAmerica	2007
H4g1.7	CY034634	mallardduck/Minnesota/Sg-00053/2007	Avian	H4	N6	USA	NorthAmerica	2007
H4g1.7	CY033780	mallardduck/Minnesota/Sg-00120/2007	Avian	H4	N6	USA	NorthAmerica	2007
H4g1.7	CY033671	blue-wingedteal/Minnesota/Sg-00032/2007	Avian	H4	N6	USA	NorthAmerica	2007
H4g1.7	CY033675	blue-wingedteal/Minnesota/Sg-00034/2007	Avian	H4	N6	USA	NorthAmerica	2007
H4g1.7	CY033714	blue-wingedteal/Texas/Sg-00074/2007	Avian	H4	N8	USA	NorthAmerica	2007
H4g1.7	CY033681	blue-wingedteal/Minnesota/Sg-00039/2007	Avian	H4	N6	USA	NorthAmerica	2007
H4g1.7	CY033687	blue-wingedteal/Minnesota/Sg-00043/2007	Avian	H4	N6	USA	NorthAmerica	2007
H4g1.7	CY033680	blue-wingedteal/Minnesota/Sg-00038/2007	Avian	H4	N6	USA	NorthAmerica	2007
H4g1.7	CY033758	blue-wingedteal/Minnesota/Sg-00102/2007	Avian	H4	N6	USA	NorthAmerica	2007
H4g1.7	CY034632	mallardduck/Minnesota/Sg-00050/2007	Avian	H4	N6	USA	NorthAmerica	2007
H4g1.7	CY042016	mallardduck/Minnesota/Sg-00054/2007	Avian	H4	N6	USA	NorthAmerica	2007
H4g1.7	CY042249	Americanwigeon/Minnesota/Sg-00231/2007	Avian	H4	N6	USA	NorthAmerica	2007
H4g1.7	CY033702	mallardduck/Minnesota/Sg-00058/2007	Avian	H4	N6	USA	NorthAmerica	2007
H4g1.7	CY034624	blue-wingedteal/Minnesota/Sg-00036/2007	Avian	H4	N6	USA	NorthAmerica	2007
H4g1.7	CY043008	blue-wingedteal/NorthDakota/Sg-00727/2008	Avian	H4	N6	USA	NorthAmerica	2008
H4g1.7	CY033711	ring-neckedduck/Minnesota/Sg-00067/2007	Avian	H4	N6	USA	NorthAmerica	2007
H4g1.7	CY042982	blue-wingedteal/NorthDakota/Sg-00713/2008	Avian	H4	N6	USA	NorthAmerica	2008
H4g1.7	CY043005	blue-wingedteal/NorthDakota/Sg-00724/2008	Avian	H4	N6	USA	NorthAmerica	2008
H4g1.7	CY033685	blue-wingedteal/Minnesota/Sg-00042/2007	Avian	H4	N6	USA	NorthAmerica	2007
H4g1.7	CY033688	mallardduck/Minnesota/Sg-00045/2007	Avian	H4	N6	USA	NorthAmerica	2007
H4g1.7	CY034649	blue-wingedteal/Texas/Sg-00081/2007	Avian	H4	N6	USA	NorthAmerica	2007
H4g1.7	CY034627	blue-wingedteal/Minnesota/Sg-00041/2007	Avian	H4	N6	USA	NorthAmerica	2007
H4g1.7	CY033660	blue-wingedteal/Minnesota/Sg-00028/2007	Avian	H4	N6	USA	NorthAmerica	2007
H4g1.7	CY033663	blue-wingedteal/Minnesota/Sg-00029/2007	Avian	H4	N6	USA	NorthAmerica	2007
H4g1.7	CY033667	blue-wingedteal/Minnesota/Sg-00030/2007	Avian	H4	N6	USA	NorthAmerica	2007
H4g1.7	CY033677	blue-wingedteal/Minnesota/Sg-00035/2007	Avian	H4	N6	USA	NorthAmerica	2007
H4g1.7	CY033695	mallardduck/Minnesota/Sg-00052/2007	Avian	H4	N6	USA	NorthAmerica	2007
H4g1.7	CY033706	mallardduck/Minnesota/Sg-00063/2007	Avian	H4	N6	USA	NorthAmerica	2007
H4g1.7	CY034622	blue-wingedteal/Minnesota/Sg-00031/2007	Avian	H4	N6	USA	NorthAmerica	2007
H4g1.7	CY034623	blue-wingedteal/Minnesota/Sg-00033/2007	Avian	H4	N6	USA	NorthAmerica	2007
H4g1.7	CY042998	blue-wingedteal/NorthDakota/Sg-00717/2008	Avian	H4	N6	USA	NorthAmerica	2008
H4g1.7	FJ520105	northernpintail/California/44355-442/2007	Avian	H4	N6	USA	NorthAmerica	2007
H4g1.7	FJ520103	northernpintail/California/44345-762/2007	Avian	H4	N2	USA	NorthAmerica	2007
H4g1.7	CY045335	mallard/California/GL30/2005	Avian	H4	N6	USA	NorthAmerica	2005
H4g1.7	CY042372	mallard/SouthDakota/Sg-00458/2008	Avian	H4	N6	USA	NorthAmerica	2008
H4g1.7	CY042376	mallard/SouthDakota/Sg-00459/2008	Avian	H4	N6	USA	NorthAmerica	2008
H4g1.7	CY042380	mallard/SouthDakota/Sg-00460/2008	Avian	H4	N6	USA	NorthAmerica	2008
H4g1.7	CY035399	mallard/Minnesota/Sg-00219/2007	Avian	H4	N8	USA	NorthAmerica	2007
H4g1.7	CY047680	Americangreen-wingedteal/Manitoba/23884/2007	Avian	H4	N6	Canada	NorthAmerica	2007
H4g1.7	CY035382	blue-wingedteal/Texas/Sg-00212/2007	Avian	H4	N5	USA	NorthAmerica	2007
H4g1.7	CY034645	blue-wingedteal/Texas/Sg-00075/2007	Avian	H4	N6	USA	NorthAmerica	2007
H4g1.7	CY033741	blue-wingedteal/Texas/Sg-00089/2007	Avian	H4	N6	USA	NorthAmerica	2007
H4g1.7	CY042336	ring-neckedduck/Minnesota/Sg-00449/2008	Avian	H4	N8	USA	NorthAmerica	2008
H4g1.7	CY042340	blue-wingedteal/Minnesota/Sg-00450/2008	Avian	H4	N8	USA	NorthAmerica	2008
H4g1.7	CY042344	blue-wingedteal/Minnesota/Sg-00451/2008	Avian	H4	N8	USA	NorthAmerica	2008
H4g1.7	CY047536	green-wingedteal/Alberta/11383/2005	Avian	H4	N6	Canada	NorthAmerica	2005
H4g1.7	CY042239	blue-wingedteal/Minnesota/Sg-00229/2006	Avian	H4	N6	USA	NorthAmerica	2006
H4g1.7	CY035348	blue-wingedteal/Minnesota/Sg-00201/2007	Avian	H4	N6	USA	NorthAmerica	2007
H4g1.7	CY038370	northernpintail/InteriorAlaska/2/2007	Avian	H4	N8	USA	NorthAmerica	2007
H4g1.7	CY039786	mallard/InteriorAlaska/4/2007	Avian	H4	N6	USA	NorthAmerica	2007
H4g1.7	CY039834	northernshoveler/InteriorAlaska/1/2007	Avian	H4	N6	USA	NorthAmerica	2007
H4g1.7	CY034646	blue-wingedteal/Texas/Sg-00076/2007	Avian	H4	N6	USA	NorthAmerica	2007
H4g1.7	CY042999	blue-wingedteal/NorthDakota/Sg-00718/2008	Avian	H4	N6	USA	NorthAmerica	2008
H4g1.7	CY043025	blue-wingedteal/NorthDakota/Sg-00748/2008	Avian	H4	N6	USA	NorthAmerica	2008
H4g1.7	CY039739	mallard/California/7766/2008	Avian	H4	N6	USA	NorthAmerica	2008
H4g1.7	CY043026	blue-wingedteal/NorthDakota/Sg-00750/2008	Avian	H4	N6	USA	NorthAmerica	2008
H4g1.7	CY042978	blue-wingedteal/NorthDakota/Sg-00712/2008	Avian	H4	N6	USA	NorthAmerica	2008
H4g1.7	FJ520092	northernpintail/California/44249-38/2006	Avian	H4	N6	USA	NorthAmerica	2006
H4g1.7	CY045415	mallard/InteriorAlaska/7MP0372/2007	Avian	H4	N6	USA	NorthAmerica	2007
H4g1.7	CY036651	northernpintail/InteriorAlaska/1/2007	Avian	H4	N6	USA	NorthAmerica	2007
H4g1.7	CY043992	northernpintail/Alaska/7MP1393/2007	Avian	H4	N6	USA	NorthAmerica	2007
H4g1.7	EU557510	northernpintail/Alaska/44191-123/2006	Avian	H4	N6	USA	NorthAmerica	2006
H4g1.7	EU557514	northernpintail/Alaska/44243-063/2006	Avian	H4	N6	USA	NorthAmerica	2006
H4g1.7	EU557509	northernpintail/Alaska/44161-173/2006	Avian	H4	N6	USA	NorthAmerica	2006
H4g1.7	EU557512	northernpintail/Alaska/44188-175/2006	Avian	H4	N6	USA	NorthAmerica	2006
H4g1.7	EU557511	northernpintail/Alaska/44188-158/2006	Avian	H4	N6	USA	NorthAmerica	2006
H4g1.7	CY045455	northernshoveler/InteriorAlaska/7MP1601/2007	Avian	H4	N6	USA	NorthAmerica	2007
H4g1.7	EU557515	northernpintail/Alaska/44203-079/2006	Avian	H4	N6	USA	NorthAmerica	2006
H4g1.7	CY043952	northernshoveler/Alaska/7MP1113/2007	Avian	H4	N6	USA	NorthAmerica	2007
H4g1.7	CY043968	mallard/Alaska/7MP1028/2007	Avian	H4	N8	USA	NorthAmerica	2007
H4g1.7	CY045423	mallard/InteriorAlaska/7MP1050R1/2007	Avian	H4	N6	USA	NorthAmerica	2007
H4g1.7	CY045463	mallard/InteriorAlaska/7MP1718/2007	Avian	H4	N5	USA	NorthAmerica	2007
H4g1.7	CY039771	mallard/InteriorAlaska/6/2007	Avian	H4	N6	USA	NorthAmerica	2007
H4g1.7	CY039810	mallard/InteriorAlaska/2/2007	Avian	H4	N6	USA	NorthAmerica	2007
H4g1.7	CY039842	mallard/InteriorAlaska/1/2007	Avian	H4	N5	USA	NorthAmerica	2007
H4g1.7	CY039866	mallard/InteriorAlaska/3/2007	Avian	H4	N6	USA	NorthAmerica	2007
H4g1.7	CY044016	northernshoveler/Alaska/7MP0954/2007	Avian	H4	N6	USA	NorthAmerica	2007
H4g1.7	CY035869	leastsandpiper/SouthCentralAlaska/1/2007	Avian	H4	N8	USA	NorthAmerica	2007
H4g1.7	CY044000	leastsandpiper/Alaska/7KW0411/2007	Avian	H4	N8	USA	NorthAmerica	2007
H4g1.7	CY035783	leastsandpiper/SouthCentralAlaska/2/2007	Avian	H4	N8	USA	NorthAmerica	2007
H4g1.7	CY035791	leastsandpiper/SouthCentralAlaska/3/2007	Avian	H4	N8	USA	NorthAmerica	2007
H4g2.1	DQ327834	red-neckedStint/Australia/1/2004	Avian	H4	N8	Australia	Oceania	2004
H4g2.1	CY028259	red-neckedstint/Australia/2/2004	Avian	H4	N8	Australia	Oceania	2004
H4g2.1	CY029889	red-neckedstint/Australia/5/2004	Avian	H4	N8	Australia	Oceania	2004
H4g2.1	CY034742	red-neckedstint/Australia/3/2004	Avian	H4	N8	Australia	Oceania	2004
H4g2.2	CY028251	duck/Victoria/5384/2002	Avian	H4	N8	Australia	Oceania	2002
H4g2.2	CY045247	duck/Victoria/D23/1994	Avian	H4	N2	Australia	Oceania	1994
H4g2.3	M25285	budgerigar/Hokkaido/1/1977	Avian	H4	N6	Japan	Asia	1977
H4g2.3	CY006027	duck/HongKong/365/1978	Avian	H4	N6	HongKong	Asia	1978
H4g2.3	AB292404	duck/HongKong/951/1980	Avian	H4	N1	HongKong	Asia	1980
H4g2.3	GQ247847	cockatoo/England/1972	Avian	H4	N8	UnitedKingdom	Europe	1972
H4g2.4.1	M25283	duck/Czeckoslovakia/1956	Avian	H4	N6	CzechRepublic	Europe	1956
H4g2.4.1	AB295611	duck/Czech/1956	Avian	H4	N6	CzechRepublic	Europe	1956
H4g2.4.1	CY045327	duck/CzechRepublic/1/1956	Avian	H4	N6	CzechRepublic	Europe	1956
H4g2.4.1	AF290436	Duck/Czechoslovakia/56	Avian	H4	N6	CzechRepublic	Europe	1956
H4g2.4.1	D90302	duck/Czechoslovakia/1956	Avian	H4	N6	CzechRepublic	Europe	1956
H4g2.4.1	M25284	greyteal/Australia/2/1979	Avian	H4	N4	Australia	Oceania	1979
H4g2.4.2	EF041495	duck/SouthAfrica/1233	Avian	H4	N8	SouthAfrica	Africa	2004
H4g2.4.2	FJ434369	coot/Aktau/1454/2006	Avian	H4	N6	Kazakhstan	Asia	2006
H4g2.4.2	FJ434370	commonpochard/Aktau/1455/2006	Avian	H4	N6	Kazakhstan	Asia	2006
H4g2.4.2	AB450446	duck/Mongolia/274/2007	Avian	H4	N3	Mongolia	Asia	2007
H4g2.4.2	CY041354	mallard/Sweden/65/2005	Avian	H4	N3	Sweden	Europe	2005
H4g2.4.2	CY041250	mallard/Netherlands/2/2005	Avian	H4	N2	Netherlands	Europe	2005
H4g2.4.3	CY045359	mallard/NewZealand/1615-17/2004	Avian	H4	N6	NewZealand	Oceania	2004
H4g2.4.3	CY033153	red-neckedstint/WesternAustralia/4126/1980	Avian	H4	N8	Australia	Oceania	1980
H4g2.4.3	CY035890	red-neckedstint/WesternAustralia/4094/1984	Avian	H4	N8	Australia	Oceania	1984
H4g2.4.3	CY014630	red-neckedstint/Australia/4189/1980	Avian	H4	N8	Australia	Oceania	1980
H4g2.4.3	M25286	duck/NewZealand/31/1976	Avian	H4	N6	NewZealand	Oceania	1976
H4g2.4.3	CY005679	grayteal/AUS/3/1979	Avian	H4	N6	Australia	Oceania	1979
H4g2.4.3	CY031156	grayteal/WesternAustralia/1855/1979	Avian	H4	N6	Australia	Oceania	1979
H4g2.4.3	CY005672	greyteal/Australia/2/1979	Avian	H4	N4	Australia	Oceania	1979
H4g2.4.3	CY045263	grayteal/WesternAustralia/1840/1979	Avian	H4	N4	Australia	Oceania	1979
H4g2.5.1	AB289331	duck/HongKong/438/1977	Avian	H4	N8	HongKong	Asia	1977
H4g2.5.1	CY006030	duck/HongKong/24/1976	Avian	H4	N2	HongKong	Asia	1976
H4g2.5.1	AB292408	duck/HongKong/229/1977	Avian	H4	N3	HongKong	Asia	1977
H4g2.5.2	FJ439566	duck/PoyangLake/FB13/2007	Avian	H4	N6	China	Asia	2007
H4g2.5.2	EF541418	duck/VietNam/14/2001	Avian	H4	N6	VietNam	Asia	2001
H4g2.5.2	GU066543	duck/Taiwan/wb7/1999	Avian	H4	N6	Taiwan	Asia	1999
H4g2.5.2	GU066547	duck/Taiwan/wb25/1999	Avian	H4	N6	Taiwan	Asia	1999
H4g2.5.2	AB289333	duck/Mongolia/583/02	Avian	H4	N7	Mongolia	Asia	2002
H4g2.5.2	GU066541	duck/Taiwan/wb1162/2006	Avian	H4	N6	Taiwan	Asia	2006
H4g2.5.2	GU066551	duck/Taiwan/wb39/1998	Avian	H4	N6	Taiwan	Asia	1998
H4g2.5.2	GU066544	duck/Taiwan/wb9/1998	Avian	H4	N6	Taiwan	Asia	1998
H4g2.5.2	GU066545	duck/Taiwan/wb14/1998	Avian	H4	N6	Taiwan	Asia	1998
H4g2.5.2	GU066546	duck/Taiwan/wb24/1998	Avian	H4	N6	Taiwan	Asia	1998
H4g2.5.2	EU880342	mallard/Yanchen/2005	Avian	H4	N6	China	Asia	2005
H4g2.5.2	FJ349247	mallard/ZhaLong/88/2004	Avian	H4	N6	China	Asia	2004
H4g2.5.2	AB450439	duck/Hokkaido/138/2007	Avian	H4	N6	Japan	Asia	2007
H4g2.5.2	GU066564	duck/Taiwan/wb1101/2006	Avian	H4	N6	Taiwan	Asia	2006
H4g2.5.2	GU066566	duck/Taiwan/wb1111/2006	Avian	H4	N6	Taiwan	Asia	2006
H4g2.5.2	FJ428583	mallard/PoyangLake/15/2007	Avian	H4	N6	China	Asia	2007
H4g2.5.2	FJ439565	mallard/PoyangLake/P17/2007	Avian	H4	N6	China	Asia	2007
H4g2.5.2	GU066563	duck/Taiwan/wb917/2006	Avian	H4	N6	Taiwan	Asia	2006
H4g2.5.2	GU066567	duck/Taiwan/wb1153/2006	Avian	H4	N6	Taiwan	Asia	2006
H4g2.5.2	GU066565	duck/Taiwan/wb1104/2006	Avian	H4	N6	Taiwan	Asia	2006
H4g2.5.2	GU066568	duck/Taiwan/wb1158/2006	Avian	H4	N6	Taiwan	Asia	2006
H4g2.5.2	GU066557	duck/Taiwan/wb471/2004	Avian	H4	N6	Taiwan	Asia	2004
H4g2.5.2	GU066562	duck/Taiwan/wb884/2005	Avian	H4	N6	Taiwan	Asia	2005
H4g2.5.2	GU066556	duck/Taiwan/wb281/2002	Avian	H4	N6	Taiwan	Asia	2002
H4g2.5.2	GU066554	duck/Taiwan/wb131/2001	Avian	H4	N8	Taiwan	Asia	2001
H4g2.5.2	GU066555	duck/Taiwan/wb147/2001	Avian	H4	N6	Taiwan	Asia	2001
H4g2.5.2	AB304147	duck/Shiga/8/2004	Avian	H4	N6	Japan	Asia	2004
H4g2.5.2	GU066552	duck/Taiwan/wb45/1998	Avian	H4	N7	Taiwan	Asia	1998
H4g2.5.2	GU066553	duck/Taiwan/wb51/1999	Avian	H4	N6	Taiwan	Asia	1999
H4g2.5.2	GU066548	duck/Taiwan/wb28/2000	Avian	H4	N6	Taiwan	Asia	2000
H4g2.5.2	CY006017	Duck/Nanchang/4-165/2000	Avian	H4	N6	China	Asia	2000
H4g2.5.2	GU066550	duck/Taiwan/wb30/1999	Avian	H4	N6	Taiwan	Asia	1999
H4g2.5.2	GU066542	duck/Taiwan/wb1/1998	Avian	H4	N2	Taiwan	Asia	1998
H4g2.5.2	AB288842	duck/Hokkaido/1058/01	Avian	H4	N5	Japan	Asia	2001
H4g2.5.2	GU066549	duck/Taiwan/wb29/1998	Avian	H4	N8	Taiwan	Asia	1998
H4g2.5.2	EU580563	muskrat/Buryatiya/1944/2000	Muskrat	H4	N6	Russia	Europe	2000
H4g2.5.2	EU580565	pochard/Buryatiya/1941/2000	Avian	H4	N6	Russia	Europe	2000
H4g2.5.2	EU580566	shoveler/Buryatiya/1898/2000	Avian	H4	N6	Russia	Europe	2000
H4g2.5.2	EU580567	tuftedduck/Buryatuya/1905/2000	Avian	H4	N6	Russia	Europe	2000
H4g2.5.2	EU580564	pochard/Buryatiya/1903/2000	Avian	H4	N6	Russia	Europe	2000
H4g2.5.2	AB295609	duck/Siberia/378/2001	Avian	H4	N6	Russia	Europe	2001
H4g2.5.2	AB292662	duck/Siberia/701/1996	Avian	H4	N6	Russia	Europe	1996

## Sheet: H5
H5g1.1	M30122	turkey/Ontario/7732/1966	Avian	H5	N9	Canada	NorthAmerica	1966
H5g1.1	U79456	turkey/Wisconsin/68	Avian	H5	N9	USA	NorthAmerica	1968
H5g1.2	EU743293	mallard/WI/42/1975	Avian	H5	N2	USA	NorthAmerica	1975
H5g1.2	U79451	mallard/Wisconsin/34/75	Avian	H5	N6	USA	NorthAmerica	1975
H5g1.3.1	M10243	chicken/Pennsylvania/1370/1983	Avian	H5	N2	USA	NorthAmerica	1983
H5g1.3.1	M18001	chicken/Pennsylvania/1/1983	Avian	H5	N2	USA	NorthAmerica	1983
H5g1.3.1	AF164657	Chicken/Virginia/40018/84	Avian	H5	N2	USA	NorthAmerica	1984
H5g1.3.1	FJ610134	chicken/VA/40018/1984	Avian	H5	N2	USA	NorthAmerica	1984
H5g1.3.1	AF164655	Turkey/Virginia/6962/83	Avian	H5	N2	USA	NorthAmerica	1983
H5g1.3.1	AF164656	Turkey/Virginia/40018/84	Avian	H5	N2	USA	NorthAmerica	1984
H5g1.3.1	J04325	chick/Pennsylvania/1/1983	Avian	H5	N2	USA	NorthAmerica	1983
H5g1.3.1	CY015073	chicken/Pennsylvania/1/1983	Avian	H5	N2	USA	NorthAmerica	1983
H5g1.3.2	AF164659	Chicken/Pennsylvania/10210/86	Avian	H5	N2	USA	NorthAmerica	1986
H5g1.3.2	EU743233	goose/OH/22911-2/1986	Avian	H5	N2	USA	NorthAmerica	1986
H5g1.3.2	AF164661	Chicken/Ohio/22911-10/86	Avian	H5	N2	USA	NorthAmerica	1986
H5g1.3.2	FJ357091	guineafowl/OH/22911-20/1986	Avian	H5	N2	USA	NorthAmerica	1986
H5g1.3.2	AF164660	Chicken/Massachusetts/11801/86	Avian	H5	N2	USA	NorthAmerica	1986
H5g1.3.2	AF164663	Chicken/NewYork/12004-3/87	Avian	H5	N2	USA	NorthAmerica	1987
H5g1.3.2	AF164658	Chicken/NewJersey/12508/86	Avian	H5	N2	USA	NorthAmerica	1986
H5g1.3.2	AF164662	Chicken/Florida/27716-2/86	Avian	H5	N2	USA	NorthAmerica	1986
H5g1.3.3	AF164665	Chicken/Florida/2507/89	Avian	H5	N2	USA	NorthAmerica	1989
H5g1.3.3	AF164664	Chicken/Florida/22780-2/88	Avian	H5	N2	USA	NorthAmerica	1988
H5g1.4.1	AY849793	chicken/TX/298313/04	Avian	H5	N2	USA	NorthAmerica	2004
H5g1.4.1	AY296085	chicken/TX/167280-4/02	Avian	H5	N3	USA	NorthAmerica	2002
H5g1.4.1	CY034683	chicken/Texas/167280-4/2002	Avian	H5	N3	USA	NorthAmerica	2002
H5g1.4.2	AY296082	duck/NY/191255-79/02	Avian	H5	N2	USA	NorthAmerica	2002
H5g1.4.2	AY296080	Duck/NY/185502/2002	Avian	H5	N2	USA	NorthAmerica	2002
H5g1.4.2	AY296081	duck/NY/186875/02	Avian	H5	N2	USA	NorthAmerica	2002
H5g1.4.2	AY296076	unknown/NY/101250-18/01	Unknown	H5	N2	USA	NorthAmerica	2001
H5g1.4.2	CY036365	avian/NewYork/Sg-00372/2001	Avian	H5	N2	USA	NorthAmerica	2001
H5g1.4.2	AY296086	duck/NY/191255-59/02	Avian	H5	N8	USA	NorthAmerica	2002
H5g1.4.2	AY296065	pheasant/NJ/1355/98	Avian	H5	N2	USA	NorthAmerica	1998
H5g1.4.2	AY296069	avian/NY/31588-2/00	Avian	H5	N2	USA	NorthAmerica	2000
H5g1.4.2	AY296067	environment/NY/5626-2/98	Environment	H5	N2	USA	NorthAmerica	1998
H5g1.4.2	AY296066	environment/NY/5626-1/98	Environment	H5	N2	USA	NorthAmerica	1998
H5g1.4.2	AY296070	avian/NY/31588-3/00	Avian	H5	N2	USA	NorthAmerica	2000
H5g1.4.2	AY296071	duck/NY/44018-1/00	Avian	H5	N2	USA	NorthAmerica	2000
H5g1.4.2	AY296072	duck/NY/44018-2/00	Avian	H5	N2	USA	NorthAmerica	2000
H5g1.4.2	AY296073	chukkar/NY/51375/00	Avian	H5	N2	USA	NorthAmerica	2000
H5g1.4.2	AY296074	avian/NY/53726/00	Avian	H5	N2	USA	NorthAmerica	2000
H5g1.4.2	EU182303	Avian/NY/53726/2000	Avian	H5	N2	USA	NorthAmerica	2000
H5g1.4.2	EF607863	mallard/MD/302/2001	Avian	H5	N2	USA	NorthAmerica	2001
H5g1.4.2	EF607861	mallard/MD/252/2001	Avian	H5	N2	USA	NorthAmerica	2001
H5g1.4.2	EF607858	mallard/MD/790/2002	Avian	H5	N2	USA	NorthAmerica	2002
H5g1.4.2	EF607862	mallard/MD/258/2001	Avian	H5	N2	USA	NorthAmerica	2001
H5g1.4.2	EF607867	mallard/MD/792/2002	Avian	H5	N2	USA	NorthAmerica	2002
H5g1.4.2	CY016611	mallard/Maryland/789/2002	Avian	H5	N2	USA	NorthAmerica	2002
H5g1.4.2	EF607864	mallard/MD/786/2002	Avian	H5	N2	USA	NorthAmerica	2002
H5g1.4.2	EF607865	mallard/MD/789/2002	Avian	H5	N2	USA	NorthAmerica	2002
H5g1.4.2	EF607866	mallard/MD/791/2002	Avian	H5	N2	USA	NorthAmerica	2002
H5g1.4.2	EF607868	mallard/MD/795/2002	Avian	H5	N2	USA	NorthAmerica	2002
H5g1.4.2	AY296064	chukar/MN/14591-7/1998	Avian	H5	N2	USA	NorthAmerica	1998
H5g1.4.2	EF607872	mallard/MN/133/1998	Avian	H5	N2	USA	NorthAmerica	1998
H5g1.4.2	AY296068	environment/NY/5626-17/98	Environment	H5	N2	USA	NorthAmerica	1998
H5g1.4.3.1	AB241623	duck/Hokkaido/84/02	Avian	H5	N3	Japan	Asia	2002
H5g1.4.3.1	EF607892	ruddyturnstone/NJ/1851/2001	Avian	H5	N7	USA	NorthAmerica	2001
H5g1.4.3.1	EF607870	ruddyturnstone/NJ/1608/2001	Avian	H5	N2	USA	NorthAmerica	2001
H5g1.4.3.1	EF607889	shorebird/DE/1346/2001	Avian	H5	N7	USA	NorthAmerica	2001
H5g1.4.3.1	EF607891	ruddyturnstone/NJ/1698/2001	Avian	H5	N7	USA	NorthAmerica	2001
H5g1.4.3.1	EF607893	ruddyturnstone/DE/2046/2001	Avian	H5	N8	USA	NorthAmerica	2001
H5g1.4.3.1	U79455	turkey/Minnesota/10734/95	Avian	H5	N2	USA	NorthAmerica	1995
H5g1.4.3.2	CY005926	herringgull/NJ/402/1989	Avian	H5	N3	USA	NorthAmerica	1989
H5g1.4.3.2	EU743301	turkey/CA/6878/1979	Avian	H5	N3	USA	NorthAmerica	1979
H5g1.4.3.2	CY014580	mallardduck/Alberta/645/1980	Avian	H5	N2	Canada	NorthAmerica	1980
H5g1.4.3.2	EF607857	bluegoose/WI/711/1975	Avian	H5	N2	USA	NorthAmerica	1975
H5g1.4.3.2	U79450	mallard/Ohio/345/88	Avian	H5	N2	USA	NorthAmerica	1988
H5g1.4.3.2	CY005918	mallardduck/ALB/57/1976	Avian	H5	N2	Canada	NorthAmerica	1976
H5g1.4.3.2	U79453	mallard/Wisconsin/428/75	Avian	H5	N1	USA	NorthAmerica	1975
H5g1.4.3.2	U79452	mallard/Wisconsin/169/75	Avian	H5	N3	USA	NorthAmerica	1975
H5g1.4.3.2	U79449	duck/Michigan/80	Avian	H5	N2	USA	NorthAmerica	1980
H5g1.4.3.2	AF100179	MallardDuck/Pensylvania/10218/84	Avian	H5	N2	USA	NorthAmerica	1984
H5g1.4.3.2	AB295603	duck/Pennsylvania/10218/1984	Avian	H5	N2	USA	NorthAmerica	1984
H5g1.4.3.2	AF100180	MallardDuck/Pensylvania/10218/84	Avian	H5	N2	USA	NorthAmerica	1984
H5g1.4.3.2	CY036759	mallard/Wisconsin/944/1982	Avian	H5	N2	USA	NorthAmerica	1982
H5g1.4.3.2	U69277	Mallard/WI/944/82	Avian	H5	N0	USA	NorthAmerica	1982
H5g1.4.3.2	EU871820	turkey/Ontario/84/1983	Avian	H5	N1	Canada	NorthAmerica	1983
H5g1.4.3.2	CY014849	mallardduck/NewYork/189/1982	Avian	H5	N2	USA	NorthAmerica	1982
H5g1.4.3.2	U79454	turkey/Minnesota/3689-1551/81	Avian	H5	N2	USA	NorthAmerica	1981
H5g1.4.3.2	AF082040	duck/Minnesota/1525/81	Avian	H5	N1	USA	NorthAmerica	1981
H5g1.4.3.2	CY014726	duck/Minnesota/1525/1981	Avian	H5	N1	USA	NorthAmerica	1981
H5g1.4.3.2	U28919	emu/Texas/39442/93	Avian	H5	N2	USA	NorthAmerica	1993
H5g1.4.3.2	U28920	emu/Texas/39442/93	Avian	H5	N2	USA	NorthAmerica	1993
H5g1.4.3.2	EU743035	emu/TX/39924/1993	Avian	H5	N2	USA	NorthAmerica	1993
H5g1.4.3.2	EU743106	rhea/TX/39923/1993	Avian	H5	N2	USA	NorthAmerica	1993
H5g1.4.3.2	U05332	chicken/Florida/25717/1993	Avian	H5	N2	USA	NorthAmerica	1993
H5g1.4.3.2	EU743019	chicken/NJ/17169/1993	Avian	H5	N2	USA	NorthAmerica	1993
H5g1.4.3.2	EU743027	chicken/NY/14009/1993	Avian	H5	N2	USA	NorthAmerica	1993
H5g1.4.3.2	CY034681	chicken/Pennsylvania/3609/1993	Avian	H5	N2	USA	NorthAmerica	1993
H5g1.4.3.2	U05331	chicken/Pennsylvania/13609/1993	Avian	H5	N2	USA	NorthAmerica	1993
H5g1.4.3.2	CY014872	blackduck/NewYork/184/1988	Avian	H5	N2	USA	NorthAmerica	1988
H5g1.4.3.2	AF082043	gull/Pennsylvania/4175/83	Avian	H5	N1	USA	NorthAmerica	1983
H5g1.4.3.2	EU182309	turkey/MN/3397-3/1992	Avian	H5	N2	USA	NorthAmerica	1992
H5g1.4.3.2	CY014722	duck/Minnesota/1516/1981	Avian	H5	N2	USA	NorthAmerica	1981
H5g1.4.3.2	EU743600	turkey/TX/1-40-82/1982	Avian	H5	N2	USA	NorthAmerica	1982
H5g1.4.3.2	CY011248	wigeon/Ohio/379/1988	Avian	H5	N2	USA	NorthAmerica	1988
H5g1.4.3.2	EU743071	turkey/MN/40550/1987	Avian	H5	N2	USA	NorthAmerica	1987
H5g1.4.3.2	U67783	mallard/Ohio/556/1987	Avian	H5	N9	USA	NorthAmerica	1987
H5g1.4.3.2	U05330	ruddyturnstone/Delaware/244/91	Avian	H5	N2	USA	NorthAmerica	1991
H5g1.4.3.2	CY014640	duck/NewZealand/41/1984	Avian	H5	N2	NewZealand	Oceania	1984
H5g1.4.4	CY034173	cinnamonteal/California/HKWF1111/2007	Avian	H5	N7	USA	NorthAmerica	2007
H5g1.4.5	FJ520081	northernpintail/California/44242-758/2006	Avian	H5	N2	USA	NorthAmerica	2006
H5g1.4.5	FJ520104	northernpintail/California/44345-820/2007	Avian	H5	N2	USA	NorthAmerica	2007
H5g1.4.5	FJ520100	northernpintail/California/44290-230/2006	Avian	H5	N2	USA	NorthAmerica	2006
H5g1.4.5	FJ520094	northernpintail/California/44221-761/2006	Avian	H5	N9	USA	NorthAmerica	2006
H5g1.4.5	EU557516	northernpintail/Alaska/44184-144/2006	Avian	H5	N9	USA	NorthAmerica	2006
H5g1.4.5	FJ520095	northernpintail/California/44221-789/2006	Avian	H5	N2	USA	NorthAmerica	2006
H5g1.4.5	FJ520097	northernpintail/California/44221-797/2006	Avian	H5	N2	USA	NorthAmerica	2006
H5g1.4.5	FJ520093	northernpintail/California/44249-053/2006	Avian	H5	N2	USA	NorthAmerica	2006
H5g1.4.5	EU099317	Canadagoose/AK/44075-058/2006	Avian	H5	N1	USA	NorthAmerica	2006
H5g1.4.5	EF607883	mallard/WA/44242-264/2006	Avian	H5	N2	USA	NorthAmerica	2006
H5g1.4.5	EF607880	ruddyturnstone/DE/313/2003	Avian	H5	N2	USA	NorthAmerica	2003
H5g1.4.5	EF607881	ruddyturnstone/DE/371/2003	Avian	H5	N2	USA	NorthAmerica	2003
H5g1.4.5	CY033444	Americangreen-wingedteal/California/HKWF609/2007	Avian	H5	N2	USA	NorthAmerica	2007
H5g1.4.5	AY296083	turkey/CA/D0208651-C/02	Avian	H5	N2	USA	NorthAmerica	2002
H5g1.4.5	EF607856	woodduck/MD/04-623/2004	Avian	H5	N1	USA	NorthAmerica	2004
H5g1.4.5	CY039636	env/California/7251/2008	Environment	H5	N3	USA	NorthAmerica	2008
H5g1.4.5	CY039644	env/California/7255/2008	Environment	H5	N3	USA	NorthAmerica	2008
H5g1.4.5	CY039652	env/California/7258/2008	Environment	H5	N3	USA	NorthAmerica	2008
H5g1.4.5	CY039660	env/California/7261/2008	Environment	H5	N3	USA	NorthAmerica	2008
H5g1.4.5	CY039668	env/California/7262/2008	Environment	H5	N3	USA	NorthAmerica	2008
H5g1.4.5	CY039676	env/California/7264/2008	Environment	H5	N3	USA	NorthAmerica	2008
H5g1.4.5	CY039723	env/California/7341/2008	Environment	H5	N3	USA	NorthAmerica	2008
H5g1.4.5	CY039731	env/California/7600/2008	Environment	H5	N3	USA	NorthAmerica	2008
H5g1.4.5	EU980494	mallard/MD/898/2002	Avian	H5	N2	USA	NorthAmerica	2002
H5g1.4.5	EF607859	mallard/MD/865/2002	Avian	H5	N2	USA	NorthAmerica	2002
H5g1.4.5	EF607869	mallard/MD/866/2002	Avian	H5	N2	USA	NorthAmerica	2002
H5g1.4.5	CY043928	shorebird/Delaware/472/2007	Avian	H5	N1	USA	NorthAmerica	2007
H5g1.4.5	CY045399	shorebird/Delaware/189/2007	Avian	H5	N1	USA	NorthAmerica	2007
H5g1.4.5	CY036385	avian/NewYork/Sg-00377/2001	Avian	H5	N2	USA	NorthAmerica	2001
H5g1.4.5	AY296078	unknown/NY/118547-11/2001	Unknown	H5	N2	USA	NorthAmerica	2001
H5g1.4.5	CY039375	northernpintail/BritishColumbia/07847/2005	Avian	H5	N2	Canada	NorthAmerica	2005
H5g1.4.5	DQ826532	mallard/BC/373/2005	Avian	H5	N2	Canada	NorthAmerica	2005
H5g1.4.5	CY047496	mallard/BritishColumbia/07826/2005	Avian	H5	N2	Canada	NorthAmerica	2005
H5g1.4.5	CY036369	duck/NewYork/Sg-00373/2001	Avian	H5	N2	USA	NorthAmerica	2001
H5g1.4.5	AY296075	unknown/NY/9899-6/01	Unknown	H5	N2	USA	NorthAmerica	2001
H5g1.4.5	AY296077	Duck/NJ/117228-7/2001	Avian	H5	N2	USA	NorthAmerica	2001
H5g1.4.5	AY296079	duck/ME/151895-7A/02	Avian	H5	N2	USA	NorthAmerica	2002
H5g1.4.5	AY296084	ruddyturnstone/NJ/2242/00	Avian	H5	N3	USA	NorthAmerica	2000
H5g1.4.5	CY005927	shorebird/DE/101/2004	Avian	H5	N7	USA	NorthAmerica	2004
H5g1.4.5	CY031036	environment/Maryland/1189/2006	Environment	H5	N1	USA	NorthAmerica	2006
H5g1.4.5	CY034679	muteswan/Michigan/451072/2006	Avian	H5	N1	USA	NorthAmerica	2006
H5g1.4.5	CY036353	avian/NewYork/Sg-00369/2001	Avian	H5	N2	USA	NorthAmerica	2001
H5g1.4.5	CY036424	avian/NewYork/Sg-00387/2002	Avian	H5	N2	USA	NorthAmerica	2002
H5g1.4.5	CY036428	avian/NewYork/Sg-00388/2002	Avian	H5	N2	USA	NorthAmerica	2002
H5g1.4.5	CY047552	mallard/Quebec/16334/2005	Avian	H5	N3	Canada	NorthAmerica	2005
H5g1.4.5	CY047704	blue-wingedteal/Saskatchewan/22542/2007	Avian	H5	N2	Canada	NorthAmerica	2007
H5g1.4.5	EF205596	mallard/MB/458/2005	Avian	H5	N0	Canada	NorthAmerica	2005
H5g1.4.5	EF607854	duck/PA/454069/2005	Avian	H5	N1	USA	NorthAmerica	2005
H5g1.4.5	EF607855	muteswan/MI/451072-2/2006	Avian	H5	N1	USA	NorthAmerica	2006
H5g1.4.5	EF607871	mallard/MN/113/2000	Avian	H5	N2	USA	NorthAmerica	2000
H5g1.4.5	EF607875	mallard/MN/410/2000	Avian	H5	N2	USA	NorthAmerica	2000
H5g1.4.5	EF607882	northernpintail/FL/598/2007	Avian	H5	N2	USA	NorthAmerica	2007
H5g1.4.5	EF607884	tundraswan/AK/44049-168/2006	Avian	H5	N2	USA	NorthAmerica	2006
H5g1.4.5	EF607888	mallard/MN/105/2000	Avian	H5	N5	USA	NorthAmerica	2000
H5g1.4.5	FJ357069	mallard/MN/1/2000	Avian	H5	N2	USA	NorthAmerica	2000
H5g1.4.5	FJ357099	environment/NY/98899-6/2001	Environment	H5	N2	USA	NorthAmerica	2001
H5g1.4.5	GQ257433	duck/NewYork/492652/2007	Avian	H5	N2	USA	NorthAmerica	2007
H5g1.4.5	EF607860	mallard/MD/185/2003	Avian	H5	N2	USA	NorthAmerica	2003
H5g1.4.5	EF607894	mallard/MD/185/2003	Avian	H5	5N	USA	NorthAmerica	2003
H5g1.4.5	CY036751	environment/NewYork/11653-1/2005	Environment	H5	N2	USA	NorthAmerica	2005
H5g1.4.5	EF607886	mallard/MN/479/2000	Avian	H5	N3	USA	NorthAmerica	2000
H5g1.4.5	EF607877	mallard/OH/345/1988	Avian	H5	N2	USA	NorthAmerica	1988
H5g1.4.5	EF607876	mallard/MN/6/2000	Avian	H5	N2	USA	NorthAmerica	2000
H5g1.4.5	EF607874	mallard/MN/168/2000	Avian	H5	N2	USA	NorthAmerica	2000
H5g1.4.5	EF607873	mallard/MN/166/2000	Avian	H5	N2	USA	NorthAmerica	2000
H5g1.4.5	EF607885	mallard/MN/382/2000	Avian	H5	N3	USA	NorthAmerica	2000
H5g1.4.5	CY036034	Muscovyduck/NewYork/62095-1/2006	Avian	H5	N2	USA	NorthAmerica	2006
H5g1.4.5	CY005969	shorebird/DE/75/2004	Avian	H5	N7	USA	NorthAmerica	2004
H5g1.4.5	EU871921	ruddyturnstone/NJ/327/2004	Avian	H5	N7	USA	NorthAmerica	2004
H5g1.4.5	EF607890	ruddyturnstone/NJ/1148676/2004	Avian	H5	N7	USA	NorthAmerica	2004
H5g1.4.5	FJ686738	mallard/Maryland/897/2004	Avian	H5	N2	USA	NorthAmerica	2004
H5g1.4.5	EF607853	blackduck/NC/674-694/2006	Avian	H5	N1	USA	NorthAmerica	2006
H5g1.4.5	GQ387442	blackduck/NC/674-964/2006	Avian	H5	N1	USA	NorthAmerica	2006
H5g1.4.5	CY028235	mallard/Maryland/182/2006	Avian	H5	N2	USA	NorthAmerica	2006
H5g1.4.5	EF405825	mallard/ON/499/2005	Avian	H5	N1	Canada	NorthAmerica	2005
H5g1.4.5	EF491876	mallard/ON/499/2005	Avian	H5	N1	Canada	NorthAmerica	2005
H5g1.4.5	FJ032001	mallard/ON/499/2005	Avian	H5	N1	Canada	NorthAmerica	2005
H5g1.5.1.1	AB507264	chicken/Taiwan/A703-1/2008	Avian	H5	N2	Taiwan	Asia	2008
H5g1.5.1.1	AY573917	chicken/Taiwan/1209/03	Avian	H5	N2	Taiwan	Asia	2003
H5g1.5.1.1	U79448	chicken/Queretaro/7653-20/95	Avian	H5	N2	Mexico	NorthAmerica	1995
H5g1.5.1.1	L46587	Chicken/Queretaro/14588-19/95	Avian	H5	N2	Mexico	NorthAmerica	1995
H5g1.5.1.1	U37182	chicken/Queretaro/14588-19/1994	Avian	H5	N2	Mexico	NorthAmerica	1994
H5g1.5.1.1	AY497087	chicken/Queretaro/22019-853/96	Avian	H5	N2	Mexico	NorthAmerica	1996
H5g1.5.1.1	AY497065	chicken/VeraCruz/28159-398/95	Avian	H5	N2	Mexico	NorthAmerica	1995
H5g1.5.1.1	L46585	Chicken/Mexico/31381-Avilab/94	Avian	H5	N2	Mexico	NorthAmerica	1994
H5g1.5.1.1	FJ610108	chicken/Jalisco/14589-660/1994	Avian	H5	N2	Mexico	NorthAmerica	1994
H5g1.5.1.1	U37181	chicken/Jalisco/14585-660/1994	Avian	H5	N2	Mexico	NorthAmerica	1994
H5g1.5.1.1	CY006040	chicken/Hidalgo/28159-232/1994	Avian	H5	N2	Mexico	NorthAmerica	1994
H5g1.5.1.1	AY497072	chicken/Jalisco/28159-600/95	Avian	H5	N2	Mexico	NorthAmerica	1995
H5g1.5.1.1	AY497066	chicken/Hidalgo/28159-460/95	Avian	H5	N2	Mexico	NorthAmerica	1995
H5g1.5.1.1	AY497069	chicken/Michoacan/28159-530/95	Avian	H5	N2	Mexico	NorthAmerica	1995
H5g1.5.1.1	AY497064	chicken/Guanajuato/28159-331/95	Avian	H5	N2	Mexico	NorthAmerica	1995
H5g1.5.1.1	U37171	chicken/Queretaro/26654-1373/1994	Avian	H5	N2	Mexico	NorthAmerica	1994
H5g1.5.1.1	AY497096	chicken/Mexico/232/94	Avian	H5	N2	Mexico	NorthAmerica	1994
H5g1.5.1.1	AY497070	chicken/Morelos/28159-538/95	Avian	H5	N2	Mexico	NorthAmerica	1995
H5g1.5.1.1	AY497063	chicken/Hidalgo/232/94	Avian	H5	N2	Mexico	NorthAmerica	1994
H5g1.5.1.1	U37169	chicken/Mexico/31381-5/1994	Avian	H5	N2	Mexico	NorthAmerica	1994
H5g1.5.1.1	U37175	chicken/Mexico/31381-6/1994	Avian	H5	N2	Mexico	NorthAmerica	1994
H5g1.5.1.1	U37167	chicken/Mexico/31381-2/1994	Avian	H5	N2	Mexico	NorthAmerica	1994
H5g1.5.1.1	U37166	chicken/Mexico/31381-1/1994	Avian	H5	N2	Mexico	NorthAmerica	1994
H5g1.5.1.1	U37174	chicken/Mexico/31381-4/1994	Avian	H5	N2	Mexico	NorthAmerica	1994
H5g1.5.1.1	U37176	chicken/Mexico/31381-3/1994	Avian	H5	N2	Mexico	NorthAmerica	1994
H5g1.5.1.1	U37173	chicken/Mexico/26654-1374/1994	Avian	H5	N2	Mexico	NorthAmerica	1994
H5g1.5.1.1	U37172	chicken/Hidalgo/26654-1368/1994	Avian	H5	N2	Mexico	NorthAmerica	1994
H5g1.5.1.1	U37168	chicken/Mexico/31382-1/1994	Avian	H5	N2	Mexico	NorthAmerica	1994
H5g1.5.1.1	U37165	chicken/Mexico/31381-7/1994	Avian	H5	N2	Mexico	NorthAmerica	1994
H5g1.5.1.1	AY497077	chicken/Mexico/15407/97	Avian	H5	N2	Mexico	NorthAmerica	1997
H5g1.5.1.1	U37170	chicken/Mexico/31381-8/1994	Avian	H5	N2	Mexico	NorthAmerica	1994
H5g1.5.1.1	AY497068	chicken/Chiapa/28159-488/95	Avian	H5	N2	Mexico	NorthAmerica	1995
H5g1.5.1.1	AY497071	chicken/Mexico/28159-541/95	Avian	H5	N2	Mexico	NorthAmerica	1995
H5g1.5.1.2	FJ610094	chicken/Puebla/14587-644/1994	Avian	H5	N2	Mexico	NorthAmerica	1994
H5g1.5.1.2	L46586	Chicken/Puebla/8623-607/94	Avian	H5	N2	Mexico	NorthAmerica	1994
H5g1.5.1.2	U37177	chicken/Puebla/8624-604/1994	Avian	H5	N2	Mexico	NorthAmerica	1994
H5g1.5.1.2	U37178	chicken/Puebla/8623-607/1994	Avian	H5	N2	Mexico	NorthAmerica	1994
H5g1.5.1.2	U37179	chicken/Puebla/14585-622/1994	Avian	H5	N2	Mexico	NorthAmerica	1994
H5g1.5.1.2	U37180	chicken/Puebla/14586-654/1994	Avian	H5	N2	Mexico	NorthAmerica	1994
H5g1.5.1.3	AY497081	chicken/Aguascalientes/124-3705/98	Avian	H5	N2	Mexico	NorthAmerica	1998
H5g1.5.1.3	AY497082	chicken/Morelos/227-4353/98	Avian	H5	N2	Mexico	NorthAmerica	1998
H5g1.5.1.3	AY497083	chicken/Jalisco/229-4592/98	Avian	H5	N2	Mexico	NorthAmerica	1998
H5g1.5.1.3	AY497084	chicken/Puebla/231-5284/98	Avian	H5	N2	Mexico	NorthAmerica	1998
H5g1.5.1.3	AY497085	chicken/VeraCruz/232-6169/98	Avian	H5	N2	Mexico	NorthAmerica	1998
H5g1.5.1.3	AY497080	chicken/Morelos/FO22189/98	Avian	H5	N2	Mexico	NorthAmerica	1998
H5g1.5.1.3	AY497076	chicken/Chiapas/15406/97	Avian	H5	N2	Mexico	NorthAmerica	1997
H5g1.5.1.3	AY497078	chicken/Chiapas/15408/97	Avian	H5	N2	Mexico	NorthAmerica	1997
H5g1.5.1.3	AY497073	chicken/Mexico/37821-771/96	Avian	H5	N2	Mexico	NorthAmerica	1996
H5g1.5.2	AY497067	chicken/Puebla/28159-474/95	Avian	H5	N2	Mexico	NorthAmerica	1995
H5g1.5.3	CY014717	chicken/Chis/15224/1997	Avian	H5	N2	Mexico	NorthAmerica	1997
H5g1.5.3	AY497074	chicken/Chiapas/15224/97	Avian	H5	N2	Mexico	NorthAmerica	1997
H5g1.5.3	AF098538	chicken/chiapis/15224/97	Avian	H5	N1	Mexico	NorthAmerica	1997
H5g1.5.3	AY497075	chicken/Chiapas/15405/97	Avian	H5	N2	Mexico	NorthAmerica	1997
H5g1.5.3	AY497086	chicken/Tabasco/234-8289/98	Avian	H5	N2	Mexico	NorthAmerica	1998
H5g1.5.3	AY497079	chicken/FO/22066/98	Avian	H5	N2	Mexico	NorthAmerica	1998
H5g1.5.4	AB275431	chicken/Ibaraki/14/2005	Avian	H5	N2	Japan	Asia	2005
H5g1.5.4	AB275432	chicken/Ibaraki/15/2005	Avian	H5	N2	Japan	Asia	2005
H5g1.5.4	AB275420	chicken/Ibaraki/2/2005	Avian	H5	N2	Japan	Asia	2005
H5g1.5.4	AB275425	chicken/Ibaraki/8/2005	Avian	H5	N2	Japan	Asia	2005
H5g1.5.4	AB275427	chicken/Ibaraki/10/2005	Avian	H5	N2	Japan	Asia	2005
H5g1.5.4	AB261853	chicken/Ibaraki/1/2005	Avian	H5	N2	Japan	Asia	2005
H5g1.5.4	AB275421	chicken/Ibaraki/3/2005	Avian	H5	N2	Japan	Asia	2005
H5g1.5.4	AB275422	chicken/Ibaraki/4/2005	Avian	H5	N2	Japan	Asia	2005
H5g1.5.4	AB275423	chicken/Ibaraki/5/2005	Avian	H5	N2	Japan	Asia	2005
H5g1.5.4	AB275424	chicken/Ibaraki/6/2005	Avian	H5	N2	Japan	Asia	2005
H5g1.5.4	AB275426	chicken/Ibaraki/9/2005	Avian	H5	N2	Japan	Asia	2005
H5g1.5.4	AB275428	chicken/Ibaraki/11/2005	Avian	H5	N2	Japan	Asia	2005
H5g1.5.4	AB275433	chicken/Ibaraki/16/2005	Avian	H5	N2	Japan	Asia	2005
H5g1.5.4	AB275429	chicken/Ibaraki/12/2005	Avian	H5	N2	Japan	Asia	2005
H5g1.5.4	AB275434	chicken/Ibaraki/17/2006	Avian	H5	N2	Japan	Asia	2006
H5g1.5.4	AB275430	chicken/Ibaraki/13/2005	Avian	H5	N2	Japan	Asia	2005
H5g1.5.4	FJ864690	chicken/Mexico/435/2005	Avian	H5	N2	Mexico	NorthAmerica	2005
H5g1.5.4	DQ256383	parrot/CA/6032/04	Avian	H5	N2	USA	NorthAmerica	2004
H5g1.5.4	EU099400	chicken/Guatemala/270475-1/2003	Avian	H5	N0	Guatemala	NorthAmerica	2003
H5g1.5.4	EU099401	chicken/Guatemala/270475-4/2003	Avian	H5	N0	Guatemala	NorthAmerica	2003
H5g1.5.4	AY497093	chicken/ElSalvador/102711-1/01	Avian	H5	N2	ElSalvador	NorthAmerica	2001
H5g1.5.4	AY497094	chicken/ElSalvador/102711-2/01	Avian	H5	N2	ElSalvador	NorthAmerica	2001
H5g1.5.4	AY497091	chicken/Guatemala/45511-4/00	Avian	H5	N2	Guatemala	NorthAmerica	2000
H5g1.5.4	AY497095	chicken/Guatemala/194573/02	Avian	H5	N2	Guatemala	NorthAmerica	2002
H5g1.5.4	AY497090	chicken/Guatemala/45511-3/00	Avian	H5	N2	Guatemala	NorthAmerica	2000
H5g1.5.4	AY497092	chicken/Guatemala/45511-5/00	Avian	H5	N2	Guatemala	NorthAmerica	2000
H5g1.5.4	AY497088	chicken/Guatemala/45511-1/00	Avian	H5	N2	Mexico	NorthAmerica	2000
H5g1.5.4	AY497089	chicken/Guatemala/45511-2/00	Avian	H5	N2	Guatemala	NorthAmerica	2000
H5g2.1.1	AF098537	Turkey/Ramon/73	Avian	H5	N2	Mexico	NorthAmerica	1973
H5g2.1.2	CY014984	tern/SouthAfrica/1961	Avian	H5	N3	SouthAfrica	Africa	1961
H5g2.1.2	U20460	tern/SouthAfrica/61	Avian	H5	N3	SouthAfrica	Africa	1961
H5g2.1.2	X07826	chicken/Scotland/59	Avian	H5	N1	UnitedKingdom	Europe	1959
H5g2.1.2	X07869	chicken/Scotland/59	Avian	H5	N1	UnitedKingdom	Europe	1959
H5g2.1.2	CY015081	chicken/Scotland/1959	Avian	H5	N1	UnitedKingdom	Europe	1959
H5g2.1.2	AY500365	turkey/England/N28/73	Avian	H5	N2	UnitedKingdom	Europe	1973
H5g2.1.2	CY030993	turkey/England/N28/1973	Avian	H5	N2	UnitedKingdom	Europe	1973
H5g2.1.2	EU636684	turkey/England/N28/73	Avian	H5	N2	UnitedKingdom	Europe	1973
H5g2.1.2	CY045255	shearwater/Australia/751/1975	Avian	H5	N3	Australia	Oceania	1975
H5g2.1.3	M18450	duck/Ireland/113/1983	Avian	H5	N8	Ireland	Europe	1983
H5g2.1.3	CY015089	turkey/Ireland/1378/1983	Avian	H5	N8	Ireland	Europe	1983
H5g2.1.3	M18451	turkey/Ireland/1378/1983	Avian	H5	N8	Ireland	Europe	1983
H5g2.1.3	CY021381	turkey/Italy/1980	Avian	H5	N2	Italy	Europe	1980
H5g2.1.3	GQ247849	turkey/Italy/1980	Avian	H5	N2	Italy	Europe	1980
H5g2.1.3	CY006036	duck/Potsdam/2216-4/1984	Avian	H5	N6	Germany	Europe	1984
H5g2.1.3	AF082041	duck/Potsdam/2216-4/1984	Avian	H5	N6	Germany	Europe	1984
H5g2.1.4	AF082038	duck/HongKong/205/77	Avian	H5	N3	HongKong	Asia	1977
H5g2.1.4	CY014615	duck/HongKong/205/1977	Avian	H5	N3	HongKong	Asia	1977
H5g2.1.4	AF290443	Duck/HoChiMinh/014/78	Avian	H5	N3	China	Asia	1978
H5g2.1.4	AF082039	duck/HongKong/698/79	Avian	H5	N3	HongKong	Asia	1979
H5g2.1.4	EF597250	duck/HongKong/698/1979	Avian	H5	N3	HongKong	Asia	1979
H5g2.1.4	EF597253	duck/HongKong/819/1980	Avian	H5	N3	HongKong	Asia	1980
H5g2.1.4	EF597249	duck/HongKong/394/1978	Avian	H5	N3	HongKong	Asia	1978
H5g2.1.4	AB241615	duck/Miyagi/54/76	Avian	H5	N3	Japan	Asia	1976
H5g2.1.4	EF597247	duck/HongKong/23/1976	Avian	H5	N3	HongKong	Asia	1976
H5g2.1.4	EF597248	duck/HongKong/312/1978	Avian	H5	N3	HongKong	Asia	1978
H5g2.1.4	CY005575	duck/HongKong/342/1978	Avian	H5	N2	HongKong	Asia	1978
H5g2.1.4	EF597251	duck/HongKong/342/1978	Avian	H5	N2	HongKong	Asia	1978
H5g2.1.4	U20475	duck/HongKong/342/78	Avian	H5	N2	HongKong	Asia	1978
H5g2.1.4	CY006028	goose/HongKong/23/1978	Avian	H5	N3	HongKong	Asia	1978
H5g2.1.4	EF597252	goose/HongKong/23/1978	Avian	H5	N3	HongKong	Asia	1978
H5g2.1.5	AF082042	duck/Potsdam/1402-6/86	Avian	H5	N2	Germany	Europe	1986
H5g2.1.5	CY014642	duck/Potsdam/1402-6/1986	Avian	H5	N2	Germany	Europe	1986
H5g2.1.6	AJ632268	duck/France/02166/02	Avian	H5	N3	France	Europe	2002
H5g2.1.6	AM040150	duck/France/05056a/2005	Avian	H5	N2	France	Europe	2005
H5g2.1.6	S68489	turkey/England/50-92/91	Avian	H5	N1	UnitedKingdom	Europe	1991
H5g2.1.6	CY031001	turkey/England/N50-92/1991	Avian	H5	N1	UnitedKingdom	Europe	1991
H5g2.1.6	EU636692	turkey/England/50-92/91	Avian	H5	N1	UnitedKingdom	Europe	1991
H5g2.1.6	FJ750571	chicken/Belgium/150VB/1999	Avian	H5	N2	Belgium	Europe	1999
H5g2.1.6	EF597265	chicken/Italy/9097/1997	Avian	H5	N9	Italy	Europe	1997
H5g2.1.6	AF194992	Chicken/Italy/9097/97	Avian	H5	N9	Italy	Europe	1997
H5g2.1.6	CY022621	chicken/Italy/22	Avian	H5	N9	Italy	Europe	1998
H5g2.1.6	EU743135	emu/NY/12716/1994	Avian	H5	N9	USA	NorthAmerica	1994
H5g2.1.7	EF591749	ostrich/SouthAfrica/AI1091/2006	Avian	H5	N2	SouthAfrica	Africa	2006
H5g2.1.7	EF591757	ostrich/SouthAfrica/AI1160/2006	Avian	H5	N2	SouthAfrica	Africa	2006
H5g2.1.7	EU544247	white-facedwhistlingduck/Nigeria/3927-1/2007	Avian	H5	N2	Nigeria	Africa	2007
H5g2.1.7	EU544244	spur-wingedgoose/Nigeria/5388-8/2007	Avian	H5	N2	Nigeria	Africa	2007
H5g2.1.7	EU544242	spur-wingedgoose/Nigeria/5388-5/2007	Avian	H5	N2	Nigeria	Africa	2007
H5g2.1.7	EU544248	spur-wingedgoose/Nigeria/5388-2/2007	Avian	H5	N2	Nigeria	Africa	2007
H5g2.1.7	AB241616	swan/Hokkaido/4/96	Avian	H5	N3	Japan	Asia	1996
H5g2.1.7	AB241617	swan/Hokkaido/51/96	Avian	H5	N3	Japan	Asia	1996
H5g2.1.7	AB241618	swan/Hokkaido/67/1996	Avian	H5	N3	Japan	Asia	1996
H5g2.1.7	AF303057	duck/Malaysia/F119-3/97	Avian	H5	N3	Malaysia	Asia	1997
H5g2.1.7	EF619972	duck/Singapore/3/1997	Avian	H5	N3	Singapore	Asia	1997
H5g2.1.7	DQ092869	Pekinduck/Singapore/F59/04/98	Avian	H5	N2	Singapore	Asia	1998
H5g2.1.7	EF597262	mallard/Italy/1980/1993	Avian	H5	N2	Italy	Europe	1993
H5g2.1.7	EU564114	Anasplatyrhynchos/Altai/1285/1991	Avian	H5	N3	Russia	Europe	1991
H5g2.1.7	GQ227551	duck/Altai/1285/1991	Avian	H5	N3	Russia	Europe	1991
H5g2.1.7	FJ785143	duck/Tulcea/RO-AI-LPAI/2009	Avian	H5	N3	Romania	Europe	2009
H5g2.1.7	CY021397	mallard/Italy/3401/2005	Avian	H5	N1	Italy	Europe	2005
H5g2.1.7	DQ838508	mallard/Italy/3401/2005	Avian	H5	N1	Italy	Europe	2005
H5g2.1.7	AM408214	teal/Germany/WV632/2005	Avian	H5	N1	Germany	Europe	2005
H5g2.1.7	DQ251447	duck/Denmark/65047/04	Avian	H5	N2	Denmark	Europe	2004
H5g2.1.7	AY995891	mallard/Sweden/39/02	Avian	H5	N3	Sweden	Europe	2002
H5g2.1.7	AY684894	mallard/Netherlands/3/99	Avian	H5	N2	Netherlands	Europe	1999
H5g2.1.7	AY531029	mallard/Denmark/64650/03	Avian	H5	N7	Denmark	Europe	2003
H5g2.1.7	AY995883	mallard/Sweden/2/02	Avian	H5	N2	Sweden	Europe	2002
H5g2.1.7	AY995884	mallard/Sweden/7/02	Avian	H5	N2	Sweden	Europe	2002
H5g2.1.7	AJ971298	duck/France/05054a/2005	Avian	H5	N3	France	Europe	2005
H5g2.1.7	AJ972673	duck/France/05057b/2005	Avian	H5	N2	France	Europe	2005
H5g2.1.7	CY024746	duck/Italy/775/2004	Avian	H5	N3	Italy	Europe	2004
H5g2.1.7	DQ387854	mallard/Bavaria/1/2005	Avian	H5	N2	Germany	Europe	2005
H5g2.1.7	CY022637	teal/Italy/3931-38/2005	Avian	H5	N2	Italy	Europe	2005
H5g2.1.7	DQ851561	teal/Italy/3931/2005	Avian	H5	N2	Italy	Europe	2005
H5g2.1.7	CY034758	mallard/Italy/4223-2/2006	Avian	H5	N2	Italy	Europe	2006
H5g2.1.7	CY022645	teal/Italy/3812/2005	Avian	H5	N3	Italy	Europe	2005
H5g2.1.7	DQ838509	teal/Italy/3812/2005	Avian	H5	N3	Italy	Europe	2005
H5g2.1.7	EF597268	mallard/Italy/36/2002	Avian	H5	N3	Italy	Europe	2002
H5g2.1.7	CY022261	poultry/Italy/365/1997	Avian	H5	N2	Italy	Europe	1997
H5g2.1.7	EF597264	turkey/Italy/392/1997	Avian	H5	N2	Italy	Europe	1997
H5g2.1.7	CY018949	poultry/Italy/382/1997	Avian	H5	N2	Italy	Europe	1997
H5g2.1.7	AJ305306	chicken/Italy/8/98	Avian	H5	N2	Italy	Europe	1998
H5g2.1.7	CY020229	poultry/Italy/373/1997	Avian	H5	N2	Italy	Europe	1997
H5g2.1.7	AF194991	GuineaFowl/Italy/330/97	Avian	H5	N2	Italy	Europe	1997
H5g2.1.7	CY017403	poultry/Italy/330/1997	Avian	H5	N2	Italy	Europe	1997
H5g2.1.7	AF194990	Chicken/Italy/367/97)segment4hemagglutinin	Avian	H5	N2	Italy	Europe	1997
H5g2.1.7	CY022077	poultry/Italy/367/1997	Avian	H5	N2	Italy	Europe	1997
H5g2.1.7	CY015115	chicken/Italy/312/1997	Avian	H5	N2	Italy	Europe	1997
H5g2.1.7	AF194169	Chicken/Italy/312/97influenzavirus	Avian	H5	N2	Italy	Europe	1997
H5g2.1.7	EF597263	chicken/Italy/312/1997	Avian	H5	N2	Italy	Europe	1997
H5g2.1.8	EF041479	duck/SouthAfrica/811/2004	Avian	H5	N1	SouthAfrica	Africa	2004
H5g2.1.8	DQ104701	duck/Malaysia/F118-08-04/2004	Avian	H5	N2	Malaysia	Asia	2004
H5g2.1.8	DQ122147	duckbroiler/Malaysia/F189/07/04	Avian	H5	N2	Malaysia	Asia	2004
H5g2.1.8	AB241619	duck/Hokkaido/69/00	Avian	H5	N3	Japan	Asia	2000
H5g2.1.8	AB241620	duck/Hokkaido/447/00	Avian	H5	N3	Japan	Asia	2000
H5g2.1.8	FJ434373	muteswan/Aktau/1460/2006	Avian	H5	N1	Kazakhstan	Asia	2006
H5g2.1.8	FJ436942	swan/Mangystau/3/2006	Avian	H5	N1	Kazakhstan	Asia	2006
H5g2.1.8	EF597260	migratoryduck/JiangXi/13487/2005	Avian	H5	N3	China	Asia	2005
H5g2.1.8	EF541398	duck/VietNam/342/2001	Avian	H5	N2	VietNam	Asia	2001
H5g2.1.8	AB378682	duck/Hokkaido/167/2007	Avian	H5	N3	Japan	Asia	2007
H5g2.1.8	AB378690	duck/Hokkaido/201/2007	Avian	H5	N3	Japan	Asia	2007
H5g2.1.8	EF634332	garganey/SanJiang/160/2006	Avian	H5	N2	China	Asia	2006
H5g2.1.8	AB490826	northernpintail/Akita/714/2006	Avian	H5	N2	Japan	Asia	2006
H5g2.1.8	FJ461592	swine/Korea/C12/2008	Swine	H5	N2	SouthKorea	Asia	2008
H5g2.1.8	FJ461593	swine/Korea/C13/2008	Swine	H5	N2	SouthKorea	Asia	2008
H5g2.1.8	EF597257	migratoryduck/HongKong/MP206/2004	Avian	H5	N3	HongKong	Asia	2004
H5g2.1.8	AB241626	duck/Hokkaido/299/04	Avian	H5	N3	Japan	Asia	2004
H5g2.1.8	AB241625	duck/Hokkaido/193/04	Avian	H5	N3	Japan	Asia	2004
H5g2.1.8	AB241624	duck/Hokkaido/101/04	Avian	H5	N3	Japan	Asia	2004
H5g2.1.8	AB241614	duck/Mongolia/54/2001	Avian	H5	N2	Mongolia	Asia	2001
H5g2.1.8	EF597254	duck/Yunnan/435/2002	Avian	H5	N3	China	Asia	2002
H5g2.1.8	AB241621	duck/Mongolia/500/01	Avian	H5	N3	Mongolia	Asia	2001
H5g2.1.8	AB241622	duck/Mongolia/596/01	Avian	H5	N3	Mongolia	Asia	2001
H5g2.1.8	EF597261	goose/GuiYang/3799/2005	Avian	H5	N2	China	Asia	2005
H5g2.1.8	EF597255	duck/JiangXi/6146/2003	Avian	H5	N3	China	Asia	2003
H5g2.1.8	EF597256	duck/JiangXi/197820/2003	Avian	H5	N3	China	Asia	2003
H5g2.1.8	EF597258	duck/JiangXi/1286/2005	Avian	H5	N2	China	Asia	2005
H5g2.1.8	EF597259	duck/JiangXi/1850/2005	Avian	H5	N2	China	Asia	2005
H5g2.1.8	AJ971297	duck/France/05066b/2005	Avian	H5	N1	France	Europe	2005
H5g2.1.8	EF597269	mallard/Italy/37/2002	Avian	H5	N3	Italy	Europe	2002
H5g2.1.8	AJ632269	chicken/France/03426a/03	Avian	H5	N2	France	Europe	2003
H5g2.1.8	CY022629	turkey/Italy/1325/2005	Avian	H5	N2	Italy	Europe	2005
H5g2.1.8	CY021525	turkey/Italy/1258/2005	Avian	H5	N2	Italy	Europe	2005
H5g2.1.8	EF597267	chicken/Italy/8/1998	Avian	H5	N2	Italy	Europe	1998
H5g2.1.8	AY995885	mallard/Sweden/21/02	Avian	H5	N2	Sweden	Europe	2002
H5g2.1.8	EF597266	mallard/Italy/208/2000	Avian	H5	N3	Italy	Europe	2000
H5g2.1.8	AJ621807	duck/Primorie/2633/01	Avian	H5	N3	Russia	Europe	2001
H5g2.1.8	GQ227604	duck/Primorie/2633/2001	Avian	H5	N3	Russia	Europe	2001
H5g2.1.8	AJ621811	duck/Primorie/2621/01	Avian	H5	N2	Russia	Europe	2001
H5g2.1.8	GQ162786	duck/Primorie/2621/2001	Avian	H5	N2	Russia	Europe	2001
H5g2.1.8	FJ648285	mallard/Bavaria/1/2007	Avian	H5	N2	Germany	Europe	2007
H5g2.1.8	AY995889	mallard/Sweden/31/02	Avian	H5	N2	Sweden	Europe	2002
H5g2.1.8	AY995897	mallard/Sweden/79/02	Avian	H5	N9	Sweden	Europe	2002
H5g2.1.8	AY995898	mallard/Sweden/80/02	Avian	H5	N9	Sweden	Europe	2002
H5g2.1.8	AY995893	mallard/Sweden/49/02	Avian	H5	N9	Sweden	Europe	2002
H5g2.1.8	AY995887	mallard/Sweden/27/02	Avian	H5	N9	Sweden	Europe	2002
H5g2.1.8	AY995890	mallard/Sweden/37/02	Avian	H5	N9	Sweden	Europe	2002
H5g2.1.8	AY995892	mallard/Sweden/40/02	Avian	H5	N6	Sweden	Europe	2002
H5g2.1.8	AY995886	mallard/Sweden/22/02	Avian	H5	N9	Sweden	Europe	2002
H5g2.1.8	AY995888	mallard/Sweden/28/02	Avian	H5	N9	Sweden	Europe	2002
H5g2.1.8	AY995894	mallard/Sweden/52/02	Avian	H5	N9	Sweden	Europe	2002
H5g2.1.8	AY995895	mallard/Sweden/58/02	Avian	H5	N3	Sweden	Europe	2002
H5g2.1.8	AY995896	mallard/Sweden/64/02	Avian	H5	N2	Sweden	Europe	2002
H5g2.2.1	FJ842481	chicken/Vietnam/NCVD-03/2008	Avian	H5	N1	VietNam	Asia	2008
H5g2.2.1	FJ842484	chicken/Vietnam/NCVD-swab06/2008	Avian	H5	N1	VietNam	Asia	2008
H5g2.2.1	FJ842482	chicken/Vietnam/NCVD-04/2008	Avian	H5	N1	VietNam	Asia	2008
H5g2.2.1	FJ842483	chicken/Vietnam/NCVD-05/2008	Avian	H5	N1	VietNam	Asia	2008
H5g2.2.1	FJ842487	chicken/Vietnam/NCVD-swab20/2008	Avian	H5	N1	VietNam	Asia	2008
H5g2.2.1	FJ842485	chicken/Vietnam/NCVD-swab16/2008	Avian	H5	N1	VietNam	Asia	2008
H5g2.2.1	FJ842488	chicken/Vietnam/NCVD-swab24/2008	Avian	H5	N1	VietNam	Asia	2008
H5g2.2.1	FJ842489	chicken/Vietnam/NCVD-swab25/2008	Avian	H5	N1	VietNam	Asia	2008
H5g2.2.1	FJ842490	chicken/Vietnam/NCVD-swab26/2008	Avian	H5	N1	VietNam	Asia	2008
H5g2.2.1	FJ842486	chicken/Vietnam/NCVD-swab19/2008	Avian	H5	N1	VietNam	Asia	2008
H5g2.2.1	FJ842478	chicken/Vietnam/NCVD-swab17/2008	Avian	H5	N1	VietNam	Asia	2008
H5g2.2.1	FJ842479	chicken/Vietnam/NCVD-swab18/2008	Avian	H5	N1	VietNam	Asia	2008
H5g2.2.1	FJ842477	chicken/Vietnam/NCVD-swab15/2008	Avian	H5	N1	VietNam	Asia	2008
H5g2.2.1	FJ842480	chicken/Vietnam/NCVD-093/2008	Avian	H5	N1	VietNam	Asia	2008
H5g2.2.1	FJ842476	chicken/Vietnam/NCVD-016/2008	Avian	H5	N1	VietNam	Asia	2008
H5g2.2.1	DQ993056	chicken/Hunan/2246/2006	Avian	H5	N1	China	Asia	2006
H5g2.2.1	DQ993057	chicken/Hunan/2292/2006	Avian	H5	N1	China	Asia	2006
H5g2.2.1	DQ343150	chicken/Hebei/326/2005	Avian	H5	N1	China	Asia	2005
H5g2.2.1	DQ914814	chicken/Shanxi/2/2006	Avian	H5	N1	China	Asia	2006
H5g2.2.2	CY028954	chicken/Shantou/133/2003	Avian	H5	N1	China	Asia	2003
H5g2.2.2	CY028952	pheasant/Shantou/4567/2002	Avian	H5	N1	China	Asia	2002
H5g2.2.2	CY028955	silkychicken/Shantou/540/2003	Avian	H5	N1	China	Asia	2003
H5g2.2.2	EU616843	duck/Thailand/CU-329/07	Avian	H5	N1	Thailand	Asia	2007
H5g2.2.2	EU919140	chicken/Angthong/NIAH101204/2007	Avian	H5	N1	Thailand	Asia	2007
H5g2.2.2	AM183673	chicken/Vietnam/P78/05	Avian	H5	N1	VietNam	Asia	2005
H5g2.2.2	CY034774	duck/Vietnam/NCVD06/2005	Avian	H5	N1	VietNam	Asia	2005
H5g2.2.2	EF566199	Chicken/VietNam/NCVD10/2005	Avian	H5	N1	VietNam	Asia	2005
H5g2.2.2	AM183676	duck/Vietnam/AG40-O2/05	Avian	H5	N1	VietNam	Asia	2005
H5g2.2.2	DQ497674	duck/Vietnam/272/2005	Avian	H5	N1	VietNam	Asia	2005
H5g2.2.2	EF566200	Chicken/VietNam/NCVD09/2005	Avian	H5	N1	VietNam	Asia	2005
H5g2.2.2	CY034230	duck/Vietnam/NCVD05/2005	Avian	H5	N1	VietNam	Asia	2005
H5g2.2.2	CY017067	duck/VietNam/18/2005	Avian	H5	N1	VietNam	Asia	2005
H5g2.2.2	EU118129	duck/Vietnam/5003/2005	Avian	H5	N1	VietNam	Asia	2005
H5g2.2.2	AM183672	chicken/Vietnam/P41/05	Avian	H5	N1	VietNam	Asia	2005
H5g2.2.2	EF566198	Chicken/VietNam/NCVD12/2005	Avian	H5	N1	VietNam	Asia	2005
H5g2.2.2	CY016851	chicken/VietNam/8/2005	Avian	H5	N1	VietNam	Asia	2005
H5g2.2.2	CY016859	chicken/VietNam/9/2005	Avian	H5	N1	VietNam	Asia	2005
H5g2.2.2	CY033185	duck/Vietnam/NCVD08/2005	Avian	H5	N1	VietNam	Asia	2005
H5g2.2.2	CY016843	chicken/VietNam/6/2005	Avian	H5	N1	VietNam	Asia	2005
H5g2.2.2	CY016835	chicken/VietNam/2/2005	Avian	H5	N1	VietNam	Asia	2005
H5g2.2.2	AM183674	chicken/Vietnam/P22/05	Avian	H5	N1	VietNam	Asia	2005
H5g2.2.2	EF456803	VietNam/HN30408/2005	Human	H5	N1	VietNam	Asia	2005
H5g2.2.2	AB239125	Hanoi/30408/2005	Human	H5	N1	VietNam	Asia	2005
H5g2.2.2	DQ497685	duck/Vietnam/220/2004	Avian	H5	N1	VietNam	Asia	2004
H5g2.2.2	DQ497686	duck/Vietnam/N-XX/2004	Avian	H5	N1	VietNam	Asia	2004
H5g2.2.2	DQ497684	duck/Vietnam/219/2004	Avian	H5	N1	VietNam	Asia	2004
H5g2.2.2	DQ497677	mallard/Vietnam/352/2005	Avian	H5	N1	VietNam	Asia	2005
H5g2.2.2	DQ497676	chicken/Vietnam/348/2005	Avian	H5	N1	VietNam	Asia	2005
H5g2.2.2	AM183677	duck/Vietnam/TG24-O1/05	Avian	H5	N1	VietNam	Asia	2005
H5g2.2.2	CY016827	duck/VietNam/1/2005	Avian	H5	N1	VietNam	Asia	2005
H5g2.2.2	AM183675	duck/Vietnam/TG36-H2/05	Avian	H5	N1	VietNam	Asia	2005
H5g2.2.2	DQ497675	mallard/Vietnam/347/2005	Avian	H5	N1	VietNam	Asia	2005
H5g2.2.2	EF566203	Duck/VietNam/NCVD01/2005	Avian	H5	N1	VietNam	Asia	2005
H5g2.2.2	EF566202	MuscovyDuck/VietNam/NCVD02/2005	Avian	H5	N1	VietNam	Asia	2005
H5g2.2.2	CY031619	duck/Vietnam/NCVD01/2005	Avian	H5	N1	VietNam	Asia	2005
H5g2.2.2	CY017187	duck/VietNam/19/2005	Avian	H5	N1	VietNam	Asia	2005
H5g2.2.2	CY016891	duck/VietNam/20/2005	Avian	H5	N1	VietNam	Asia	2005
H5g2.2.2	CY031172	duck/Vietnam/7	Avian	H5	N1	VietNam	Asia	2004
H5g2.2.2	CY031180	duck/Vietnam/942	Avian	H5	N1	VietNam	Asia	2004
H5g2.2.2	EF566196	Duck/VietNam/NCVD07/2005	Avian	H5	N1	VietNam	Asia	2005
H5g2.2.2	EF566197	Duck/VietNam/NCVD06/2005	Avian	H5	N1	VietNam	Asia	2005
H5g2.2.2	EU118134	chicken/Vietnam/TY9/2005	Avian	H5	N1	VietNam	Asia	2005
H5g2.2.2	EU118128	duck/Vietnam/5001/2005	Avian	H5	N1	VietNam	Asia	2005
H5g2.2.2	EF566195	Duck/VietNam/NCVD08/2005	Avian	H5	N1	VietNam	Asia	2005
H5g2.2.2	CY016875	chicken/VietNam/11/2005	Avian	H5	N1	VietNam	Asia	2005
H5g2.2.2	CY033177	duck/Vietnam/942B/2004	Avian	H5	N1	VietNam	Asia	2004
H5g2.2.2	EF566201	Duck/VietNam/NCVD04/2005	Avian	H5	N1	VietNam	Asia	2005
H5g2.2.2	EF566204	Duck/VietNam/NCVD05/2005	Avian	H5	N1	VietNam	Asia	2005
H5g2.2.2	DQ497688	duck/Vietnam/N-TB/2005	Avian	H5	N1	VietNam	Asia	2005
H5g2.2.2	DQ497689	duck/Vietnam/317/2005	Avian	H5	N1	VietNam	Asia	2005
H5g2.2.2	EU118130	duck/Vietnam/5004/2005	Avian	H5	N1	VietNam	Asia	2005
H5g2.2.2	EU118131	duck/Vietnam/5082/2005	Avian	H5	N1	VietNam	Asia	2005
H5g2.2.2	AY590570	whitepeafowl/Thailand/CU-11/2004	Avian	H5	N1	Thailand	Asia	2004
H5g2.2.2	DQ885612	Thailand/NKNP/2005	Human	H5	N1	Thailand	Asia	2005
H5g2.2.2	DQ885616	Thailand/RPNP/2005	Human	H5	N1	Thailand	Asia	2005
H5g2.2.2	AY651373	blackheadedgull/HK/12.1/2003	Avian	H5	N1	HongKong	Asia	2003
H5g2.2.2	AY651350	Ck/HK/3176.3/2002	Avian	H5	N1	HongKong	Asia	2002
H5g2.2.2	AY679514	Thailand/LFPN-2004/2004	Human	H5	N1	Thailand	Asia	2004
H5g2.2.2	EU616831	quail/Thailand/CU-320/06	Avian	H5	N1	Thailand	Asia	2006
H5g2.2.2	FJ743696	chicken/Uthaithani/NIAH115067/2008	Avian	H5	N1	Thailand	Asia	2008
H5g2.2.2	FJ868033	chicken/Uthaithani/NIAH115067/2008	Avian	H5	N1	Thailand	Asia	2008
H5g2.2.2	EU850424	chicken/Thailand/NS-342/2008	Avian	H5	N1	Thailand	Asia	2008
H5g2.2.2	EU850416	chicken/Thailand/NS-341/2008	Avian	H5	N1	Thailand	Asia	2008
H5g2.2.2	EU620660	chicken/Thailand/PC-340/2008	Avian	H5	N1	Thailand	Asia	2008
H5g2.2.2	EU497919	chicken/Thailand/ICRC-V586/2008	Avian	H5	N1	Thailand	Asia	2008
H5g2.2.2	EU620652	chicken/Thailand/NS-339/2008	Avian	H5	N1	Thailand	Asia	2008
H5g2.2.2	EU919139	chicken/Nakhonsawan/NIAH6006587/2008	Avian	H5	N1	Thailand	Asia	2008
H5g2.2.2	DQ885618	Thailand/HA20/2005	Human	H5	N1	Thailand	Asia	2005
H5g2.2.2	AY651360	feralpigeon/HK/862.7/2002	Avian	H5	N1	HongKong	Asia	2002
H5g2.2.2	AY575874	Dk/HK/821/02	Avian	H5	N1	HongKong	Asia	2002
H5g2.2.2	AY676033	duck/HongKong/821/02	Avian	H5	N1	HongKong	Asia	2002
H5g2.2.2	DQ999887	chicken/Thailand/PC-170/2006	Avian	H5	N1	Thailand	Asia	2006
H5g2.2.2	EF582402	chicken/Uthaiyhani/NIAH6-3-0012/2005	Avian	H5	N1	Thailand	Asia	2005
H5g2.2.2	EF582401	chicken/Kamphaengphet/NIAH6-3-0011/2005	Avian	H5	N1	Thailand	Asia	2005
H5g2.2.2	FJ265573	chicken/Thailand/Kamphaengphet/NIAH6-3-0006/2005	Avian	H5	N1	Thailand	Asia	2005
H5g2.2.2	FJ455874	chicken/Sukhothai/NIAH114843/2008	Avian	H5	N1	Thailand	Asia	2008
H5g2.2.2	FJ868025	chicken/Sukhothai/NIAH114843/2008	Avian	H5	N1	Thailand	Asia	2008
H5g2.2.2	AY818135	VietNam/1203/2004	Human	H5	N1	VietNam	Asia	2004
H5g2.2.2	AY651334	VietNam/1203/2004	Human	H5	N1	VietNam	Asia	2004
H5g2.2.2	EF541403	VietNam/1203/2004	Human	H5	N1	VietNam	Asia	2004
H5g2.2.2	EF541404	VietNam/1204/2004	Human	H5	N1	VietNam	Asia	2004
H5g2.2.2	EU122394	VietNam/1203/2004	Human	H5	N1	VietNam	Asia	2004
H5g2.2.2	EU122401	VietNam/1203/2004	Human	H5	N1	VietNam	Asia	2004
H5g2.2.2	EU122398	VietNam/1203/2004	Human	H5	N1	VietNam	Asia	2004
H5g2.2.2	EU122400	VietNam/1203/2004	Human	H5	N1	VietNam	Asia	2004
H5g2.2.2	EU122397	VietNam/1203/2004	Human	H5	N1	VietNam	Asia	2004
H5g2.2.2	EU122404	VietNam/1203/2004	Human	H5	N1	VietNam	Asia	2004
H5g2.2.2	EU122399	VietNam/1203/2004	Human	H5	N1	VietNam	Asia	2004
H5g2.2.2	EU122403	VietNam/1203/2004	Human	H5	N1	VietNam	Asia	2004
H5g2.2.2	EU122396	VietNam/1203/2004	Human	H5	N1	VietNam	Asia	2004
H5g2.2.2	EU122395	VietNam/1203/2004	Human	H5	N1	VietNam	Asia	2004
H5g2.2.2	EU122402	VietNam/1203/2004	Human	H5	N1	VietNam	Asia	2004
H5g2.2.2	EU122405	VietNam/1203/2004	Human	H5	N1	VietNam	Asia	2004
H5g2.2.2	EU122406	VietNam/1203/2004	Human	H5	N1	VietNam	Asia	2004
H5g2.2.2	EU311220	India/m777/2007	Human	H5	N1	India	Asia	2007
H5g2.2.2	EF456805	Cambodia/JP52a/2005	Human	H5	N1	Cambodia	Asia	2005
H5g2.2.2	AB450566	quail/NakhonPathom/NIAH7562/2005	Avian	H5	N1	Thailand	Asia	2005
H5g2.2.2	EU676307	duck/Thailand/ICRC-V629/2008	Avian	H5	N1	Thailand	Asia	2008
H5g2.2.2	EU547798	chicken/Thailand/ICRC-618/2008	Avian	H5	N1	Thailand	Asia	2008
H5g2.2.2	AJ867074	Hatay/2004/	Avian	H5	N1	VietNam	Asia	2004
H5g2.2.2	EU616883	watercock/Thailand/CU-334/06	Avian	H5	N1	Thailand	Asia	2006
H5g2.2.2	EU616867	quail/Thailand/CU-332/06	Avian	H5	N1	Thailand	Asia	2006
H5g2.2.2	EU616851	quail/Thailand/CU-330/06	Avian	H5	N1	Thailand	Asia	2006
H5g2.2.2	EU616859	quail/Thailand/CU-331/06	Avian	H5	N1	Thailand	Asia	2006
H5g2.2.2	EU616875	quail/Thailand/CU-333/06	Avian	H5	N1	Thailand	Asia	2006
H5g2.2.2	EF473074	chicken/Cambodia/022LC3b/2005	Avian	H5	N1	Cambodia	Asia	2005
H5g2.2.2	EF473075	goose/Cambodia/022b/2005	Avian	H5	N1	Cambodia	Asia	2005
H5g2.2.2	DQ999880	chicken/Thailand/PC-168/2006	Avian	H5	N1	Thailand	Asia	2006
H5g2.2.2	AB450568	chicken/Phichit/NIAH606988/2006	Avian	H5	N1	Thailand	Asia	2006
H5g2.2.2	EF501994	chicken/Phichit/NIAH6-4-0001/2006	Avian	H5	N1	Thailand	Asia	2006
H5g2.2.2	EU919137	chicken/Phichit/NIAH1/2006	Avian	H5	N1	Thailand	Asia	2006
H5g2.2.2	AB450550	chicken/Kalasin/NIAH316/2004	Avian	H5	N1	Thailand	Asia	2004
H5g2.2.2	GQ466176	Thailand/NBL1/2006	Human	H5	N1	Thailand	Asia	2006
H5g2.2.2	AY651329	Qa/Thailand/57/2004	Avian	H5	N1	Thailand	Asia	2004
H5g2.2.2	AB450553	duck/PhangNga/NIAH181/2004	Avian	H5	N1	Thailand	Asia	2004
H5g2.2.2	DQ083576	chicken/Lopburi/Thailand/CU-38/04	Avian	H5	N1	Thailand	Asia	2004
H5g2.2.2	DQ083566	KaljiPheasant/Bangkok/Thailand/CU-18/04	Avian	H5	N1	Thailand	Asia	2004
H5g2.2.2	DQ076201	Ck/Thailand/73/2004	Avian	H5	N1	Thailand	Asia	2004
H5g2.2.2	DQ083563	crow/Bangkok/Thailand/CU-15/04	Avian	H5	N1	Thailand	Asia	2004
H5g2.2.2	DQ083564	whitepeafowl/Bangkok/Thailand/CU-16/04	Avian	H5	N1	Thailand	Asia	2004
H5g2.2.2	DQ083573	whitepeafowl/Bangkok/Thailand/CU-29/04	Avian	H5	N1	Thailand	Asia	2004
H5g2.2.2	AB450559	chicken/NakhonSawan/NIAH01502/2004	Avian	H5	N1	Thailand	Asia	2004
H5g2.2.2	EF206696	gray-crowedcrane/Thailand/VSMU-4-CBI/2005	Avian	H5	N1	Thailand	Asia	2005
H5g2.2.2	EF206699	open-billedStork/Thailand/VSMU-15-ATG/2005	Avian	H5	N1	Thailand	Asia	2005
H5g2.2.2	AY972541	tiger/Thailand/CU-T6/04	Tiger	H5	N1	Thailand	Asia	2004
H5g2.2.2	AB450562	chicken/Suphanburi/NIAH7618/2004	Avian	H5	N1	Thailand	Asia	2004
H5g2.2.2	EF582399	duck/Uthaithani/NIAH6-3-0008/2005	Avian	H5	N1	Thailand	Asia	2005
H5g2.2.2	FJ265570	duck/Uthaithani/NIAH6-3-0008/2005	Avian	H5	N1	Thailand	Asia	2005
H5g2.2.2	AB450558	chicken/Samutprakan/NIAH6604/2004	Avian	H5	N1	Thailand	Asia	2004
H5g2.2.2	AB450574	pigeon/Thailand/VSMU-13-KRI/2005	Avian	H5	N1	Thailand	Asia	2005
H5g2.2.2	AB450575	treesparrow/Thailand/VSMU-12-KRI/2005	Avian	H5	N1	Thailand	Asia	2005
H5g2.2.2	AB450577	open-billstork/Thailand/VSMU-15-ATG/2005	Avian	H5	N1	Thailand	Asia	2005
H5g2.2.2	AB450578	treesparrow/Rachaburi/VSMU-16-RBR/2005	Avian	H5	N1	Thailand	Asia	2005
H5g2.2.2	AB450579	open-billstork/Thailand/VSMU-29-NSN/2005	Avian	H5	N1	Thailand	Asia	2005
H5g2.2.2	EF178532	tiger/Thailand/VSMU-23-CBI/2004	Tiger	H5	N1	Thailand	Asia	2004
H5g2.2.2	EF178506	treesparrow/Thailand/VSMU-16-RBR/2005	Avian	H5	N1	Thailand	Asia	2005
H5g2.2.2	EF541392	Prachinburi/6231/2004	Human	H5	N1	Thailand	Asia	2004
H5g2.2.2	AB450572	commonmyna/Thailand/VSMU-10-BRM/2005	Avian	H5	N1	Thailand	Asia	2005
H5g2.2.2	DQ083572	chicken/Saraburi/Thailand/CU-27/04	Avian	H5	N1	Thailand	Asia	2004
H5g2.2.2	EF206697	greatbarbet/Thailand/VSMU-2-CBI/2005	Avian	H5	N1	Thailand	Asia	2005
H5g2.2.2	DQ083582	chicken/Prachinburi/Thailand/CU-104/04	Avian	H5	N1	Thailand	Asia	2004
H5g2.2.2	AY972539	tiger/Thailand/CU-T4/04	Tiger	H5	N1	Thailand	Asia	2004
H5g2.2.2	AY972540	tiger/Thailand/CU-T5/04	Tiger	H5	N1	Thailand	Asia	2004
H5g2.2.2	AY866475	tiger/Thailand/CU-T7/2004	Tiger	H5	N1	Thailand	Asia	2004
H5g2.2.2	AY972542	tiger/Thailand/CU-T8/04	Tiger	H5	N1	Thailand	Asia	2004
H5g2.2.2	AY842935	tiger/Thailand/CU-T3/2004	Tiger	H5	N1	Thailand	Asia	2004
H5g2.2.2	DQ530173	dog/Thailand-Suphanburi/KU-08/04	Canine	H5	N1	Thailand	Asia	2004
H5g2.2.2	DQ990003	open-billedstork/Nakhonsawan/BBA3011M/2005	Avian	H5	N1	Thailand	Asia	2005
H5g2.2.2	EF112278	open-billedstork/Nakhonsawan/BBD2316F/05	Avian	H5	N1	Thailand	Asia	2005
H5g2.2.2	EF112290	open-billedstork/Nakhonsawan/BBD3516M/05	Avian	H5	N1	Thailand	Asia	2005
H5g2.2.2	EF112285	open-billedstork/Nakhonsawan/BBA2811M/05	Avian	H5	N1	Thailand	Asia	2005
H5g2.2.2	EF112282	open-billedstork/Nakhonsawan/BBD3309M/05	Avian	H5	N1	Thailand	Asia	2005
H5g2.2.2	EF112280	open-billedstork/Nakhonsawan/BBD3009M/05	Avian	H5	N1	Thailand	Asia	2005
H5g2.2.2	EF112281	open-billedstork/Nakhonsawan/BBD3209M/05	Avian	H5	N1	Thailand	Asia	2005
H5g2.2.2	EF112283	open-billedstork/Nakhonsawan/BBD3509M/05	Avian	H5	N1	Thailand	Asia	2005
H5g2.2.2	EF112287	open-billedstork/Nakhonsawan/BBD4011M/05	Avian	H5	N1	Thailand	Asia	2005
H5g2.2.2	EF112289	open-billedstork/Nakhonsawan/BBD4411M/05	Avian	H5	N1	Thailand	Asia	2005
H5g2.2.2	EF112286	open-billedstork/Nakhonsawan/BBA2911M/05	Avian	H5	N1	Thailand	Asia	2005
H5g2.2.2	EF112284	open-billedstork/Nakhonsawan/BBA2611M/05	Avian	H5	N1	Thailand	Asia	2005
H5g2.2.2	EF112279	open-billedstork/Nakhonsawan/BBD2416F/05	Avian	H5	N1	Thailand	Asia	2005
H5g2.2.2	EF112291	open-billedstork/Nakhonsawan/BBD3616M/05	Avian	H5	N1	Thailand	Asia	2005
H5g2.2.2	EF112292	open-billedstork/Nakhonsawan/BBA0627May/05	Avian	H5	N1	Thailand	Asia	2005
H5g2.2.2	EF112276	open-billedstork/Nakhonsawan/BBD1721J/05	Avian	H5	N1	Thailand	Asia	2005
H5g2.2.2	EF112277	open-billedstork/Nakhonsawan/BBD1821J/05	Avian	H5	N1	Thailand	Asia	2005
H5g2.2.2	DQ989987	open-billedstork/Nakhonsawan/BBD1521J/2005	Avian	H5	N1	Thailand	Asia	2005
H5g2.2.2	EF112275	open-billedstork/Nakhonsawan/BBD1621J/05	Avian	H5	N1	Thailand	Asia	2005
H5g2.2.2	EF112274	open-billedstork/Nakhonsawan/BBD1421J/05	Avian	H5	N1	Thailand	Asia	2005
H5g2.2.2	CY047457	chicken/Thailand/CU-354/2008	Avian	H5	N1	Thailand	Asia	2008
H5g2.2.2	DQ989995	open-billedstork/Nakhonsawan/BBD2616F/2005	Avian	H5	N1	Thailand	Asia	2005
H5g2.2.2	AB450560	chicken/NakhonSawan/NIAH01503/2004	Avian	H5	N1	Thailand	Asia	2004
H5g2.2.2	EF112273	open-billedstork/Nakhonsawan/BBD1221J/05	Avian	H5	N1	Thailand	Asia	2005
H5g2.2.2	EF112288	open-billedstork/Nakhonsawan/BBD4211M/05	Avian	H5	N1	Thailand	Asia	2005
H5g2.2.2	EF582406	chicken/Phitsanulok/NIAH6-3-0011/2005	Avian	H5	N1	Thailand	Asia	2005
H5g2.2.2	AB450557	chicken/Loei/NIAH2373/2004	Avian	H5	N1	Thailand	Asia	2004
H5g2.2.2	DQ083570	crow/Bangkok/Thailand/CU-25/04	Avian	H5	N1	Thailand	Asia	2004
H5g2.2.2	DQ320935	quail/Malaysia/6309/2004	Avian	H5	N1	Malaysia	Asia	2004
H5g2.2.2	FJ265568	chicken/Sukhothai/NIAH6-3-0005/2005	Avian	H5	N1	Thailand	Asia	2005
H5g2.2.2	AB450564	chicken/Angthong/NIAH8334/2004	Avian	H5	N1	Thailand	Asia	2004
H5g2.2.2	DQ083575	crow/Bangkok/Thailand/CU-35/04	Avian	H5	N1	Thailand	Asia	2004
H5g2.2.2	DQ497671	mallard/Vietnam/16/2003	Avian	H5	N1	VietNam	Asia	2003
H5g2.2.2	DQ497701	chicken/Vietnam/147/2004	Avian	H5	N1	VietNam	Asia	2004
H5g2.2.2	DQ497718	chicken/Vietnam/132/2004	Avian	H5	N1	VietNam	Asia	2004
H5g2.2.2	EU919138	chicken/Phichit/NIAH600674/2008	Avian	H5	N1	Thailand	Asia	2008
H5g2.2.2	DQ497726	Vietnam/CL105/2005	Human	H5	N1	VietNam	Asia	2005
H5g2.2.2	EU616833	chicken/Thailand/CU-321/06	Avian	H5	N1	Thailand	Asia	2006
H5g2.2.2	EU124134	Duck/Vietnam/DongThap680	Avian	H5	N1	VietNam	Asia	2005
H5g2.2.2	AY651357	Ck/HK/FY157/2003	Avian	H5	N1	HongKong	Asia	2003
H5g2.2.2	EU497920	chicken/Thailand/ICRC-195/2007	Avian	H5	N1	Thailand	Asia	2007
H5g2.2.2	EF112271	open-billedstork/Bangkok/LBD0111F/04	Avian	H5	N1	Thailand	Asia	2004
H5g2.2.2	AB450570	open-billstork/Thailand/VSMU-9-BKK/2004	Avian	H5	N1	Thailand	Asia	2004
H5g2.2.2	EF112272	open-billedstork/Bangkok/LBD0511F/04	Avian	H5	N1	Thailand	Asia	2004
H5g2.2.2	CY028978	chicken/Yunnan/1083/2003	Avian	H5	N1	China	Asia	2003
H5g2.2.2	AY577314	Thailand/3	Human	H5	N1	Thailand	Asia	2004
H5g2.2.2	EF541410	Thailand/SP83/2004	Human	H5	N1	Thailand	Asia	2004
H5g2.2.2	EF582407	chicken/Phitsanulok/NIAH6-3-0017/2005	Avian	H5	N1	Thailand	Asia	2005
H5g2.2.2	FJ265571	chicken/Thailand/Phitsanulok/NIAH6-3-0012/2005	Avian	H5	N1	Thailand	Asia	2005
H5g2.2.2	DQ989979	open-billedstork/Suphanburi/TSD0912F/2004	Avian	H5	N1	Thailand	Asia	2004
H5g2.2.2	AY590569	kalijpheasant/Thailand/CU-4/2004	Avian	H5	N1	Thailand	Asia	2004
H5g2.2.2	EF582404	chicken/Kamphaengphet/NIAH6-3-0014/2005	Avian	H5	N1	Thailand	Asia	2005
H5g2.2.2	FJ265575	chicken/Thailand/Kamphaengphet/NIAH6-3-0009/2005	Avian	H5	N1	Thailand	Asia	2005
H5g2.2.2	AY590577	openbill/Thailand/CU-2/2004	Avian	H5	N1	Thailand	Asia	2004
H5g2.2.2	AB450569	open-billstork/Thailand/VSMU-2-NSN/2004	Avian	H5	N1	Thailand	Asia	2004
H5g2.2.2	AB450571	open-billstork/Thailand/VSMU-20-AY	Avian	H5	N1	Thailand	Asia	2004
H5g2.2.2	DQ989961	open-billedstork/Nakhonsawan/BBD0104F/2004	Avian	H5	N1	Thailand	Asia	2004
H5g2.2.2	DQ497670	duck/Vietnam/15/2003	Avian	H5	N1	VietNam	Asia	2003
H5g2.2.2	DQ497681	chicken/Vietnam/28/2003	Avian	H5	N1	VietNam	Asia	2003
H5g2.2.2	DQ497693	chicken/Vietnam/8/2003	Avian	H5	N1	VietNam	Asia	2003
H5g2.2.2	DQ236085	pigeon/Thailand/KU-03/04	Avian	H5	N1	Thailand	Asia	2004
H5g2.2.2	EF582397	duck/Kamphaengphet/NIAH6-2-0043/2004	Avian	H5	N1	Thailand	Asia	2004
H5g2.2.2	DQ497678	chicken/Vietnam/19/2003	Avian	H5	N1	VietNam	Asia	2003
H5g2.2.2	AY651343	Ck/VietNam/C57/2004	Avian	H5	N1	VietNam	Asia	2004
H5g2.2.2	AY818136	chicken/Vietnam/C58/04	Avian	H5	N1	VietNam	Asia	2004
H5g2.2.2	EF582408	chicken/Sukhothai/NIAH6-3-0018/2005	Avian	H5	N1	Thailand	Asia	2005
H5g2.2.2	FJ265577	chicken/Thailand/Sukhothai/NIAH6-3-0013/2005	Avian	H5	N1	Thailand	Asia	2005
H5g2.2.2	CY028975	duck/Yunnan/215/2003	Avian	H5	N1	China	Asia	2003
H5g2.2.2	CY028979	chicken/Yunnan/1251/2003	Avian	H5	N1	China	Asia	2003
H5g2.2.2	CY028980	chicken/Yunnan/1252/2003	Avian	H5	N1	China	Asia	2003
H5g2.2.2	DQ497673	duck/Vietnam/40/2004	Avian	H5	N1	VietNam	Asia	2004
H5g2.2.2	DQ497690	mallard/Vietnam/3/2003	Avian	H5	N1	VietNam	Asia	2003
H5g2.2.2	DQ497691	chicken/Vietnam/4/2003	Avian	H5	N1	VietNam	Asia	2003
H5g2.2.2	AY626143	Thailand/4	Human	H5	N1	Thailand	Asia	2004
H5g2.2.2	EU676325	brown-headgull/Thailand/vsmu-4/2008	Avian	H5	N1	Thailand	Asia	2008
H5g2.2.2	EU233416	chicken/Thailand/ICRC-V143/2007	Avian	H5	N1	Thailand	Asia	2007
H5g2.2.2	EU676317	Kalijpheasant/Thailand/vsmu-1/2008	Avian	H5	N1	Thailand	Asia	2008
H5g2.2.2	EU497921	chicken/Thailand/ICRC-213/2007	Avian	H5	N1	Thailand	Asia	2007
H5g2.2.2	AB450556	chicken/NaraThiwat/NIAH1703/2004	Avian	H5	N1	Thailand	Asia	2004
H5g2.2.2	DQ320934	chicken/Malaysia/5858/2004	Avian	H5	N1	Malaysia	Asia	2004
H5g2.2.2	DQ083569	chicken/Ayutthaya/Thailand/CU-24/04	Avian	H5	N1	Thailand	Asia	2004
H5g2.2.2	AY649382	chicken/Thailand/CH-2/2004	Avian	H5	N1	Thailand	Asia	2004
H5g2.2.2	DQ083556	chicken/Prachinburi/Thailand/CU-8/04	Avian	H5	N1	Thailand	Asia	2004
H5g2.2.2	FJ265566	pigeon/Thailand/Uttaradit-01/2004	Avian	H5	N1	Thailand	Asia	2004
H5g2.2.2	FJ265567	sparrow/Thailand/Phitsanulok-01/2004	Avian	H5	N1	Thailand	Asia	2004
H5g2.2.2	EF582403	chicken/Kamphaengphet/NIAH6-3-0013/2005	Avian	H5	N1	Thailand	Asia	2005
H5g2.2.2	FJ265574	chicken/Thailand/Kamphaengphet/NIAH6-3-0008/2005	Avian	H5	N1	Thailand	Asia	2005
H5g2.2.2	AY575873	G.H/HK/793.1/02	Avian	H5	N1	HongKong	Asia	2002
H5g2.2.2	AB212054	HongKong/213/2003	Human	H5	N1	HongKong	Asia	2003
H5g2.2.2	EF541401	HongKong/213/2003	Human	H5	N1	HongKong	Asia	2003
H5g2.2.2	AY575869	HK/212/03	Human	H5	N1	HongKong	Asia	2003
H5g2.2.2	EU221247	cloudedleopard/Thailand/KU-11/2004	Leopard	H5	N1	Thailand	Asia	2004
H5g2.2.2	AY651327	Ck/Thailand/73/2004	Avian	H5	N1	Thailand	Asia	2004
H5g2.2.2	AY646175	leopard/Suphanburi/Thailand/Leo-1/04	Leopard	H5	N1	Thailand	Asia	2004
H5g2.2.2	EU616829	watercock/Thailand/CU-319/06	Avian	H5	N1	Thailand	Asia	2006
H5g2.2.2	DQ497707	goose/Vietnam/264/2004	Avian	H5	N1	VietNam	Asia	2004
H5g2.2.2	AY555153	Thailand/2	Human	H5	N1	Thailand	Asia	2004
H5g2.2.2	EF178531	tiger/Thailand/VSMU-11-SPB/2004	Tiger	H5	N1	Thailand	Asia	2004
H5g2.2.2	AY651330	bird/Thailand/3.1/2004	Avian	H5	N1	Thailand	Asia	2004
H5g2.2.2	AY834279	tiger/Thailand/SPB-1	Tiger	H5	N1	Thailand	Asia	2004
H5g2.2.2	AY646167	tiger/Suphanburi/Thailand/Ti-1/04	Tiger	H5	N1	Thailand	Asia	2004
H5g2.2.2	DQ083585	Mynas/Ranong/Thailand/CU-209/04	Avian	H5	N1	Thailand	Asia	2004
H5g2.2.2	DQ083584	sparrow/Phang-Nga/Thailand/CU-203/04	Avian	H5	N1	Thailand	Asia	2004
H5g2.2.2	DQ083583	pigeon/SamutPrakan/Thailand/CU-202/04	Avian	H5	N1	Thailand	Asia	2004
H5g2.2.2	FJ265565	quail/Thailand/Phichit-01/2004	Avian	H5	N1	Thailand	Asia	2004
H5g2.2.2	DQ083580	chicken/Chonburi/Thailand/CU-73/04	Avian	H5	N1	Thailand	Asia	2004
H5g2.2.2	DQ083554	chicken/Bangkok/Thailand/CU-6/04	Avian	H5	N1	Thailand	Asia	2004
H5g2.2.2	DQ083551	chicken/Bangkok/Thailand/CU-3/04	Avian	H5	N1	Thailand	Asia	2004
H5g2.2.2	AY770991	chicken/Ayutthaya/Thailand/CU-23/04	Avian	H5	N1	Thailand	Asia	2004
H5g2.2.2	FJ265572	chicken/Uthaithani/NIAH6-3-0007/2005	Avian	H5	N1	Thailand	Asia	2005
H5g2.2.2	AB450573	pigeon/Thailand/VSMU-11-KRI/2005	Avian	H5	N1	Thailand	Asia	2005
H5g2.2.2	AB450554	quail/Phathumthani/NIAH2711/2004	Avian	H5	N1	Thailand	Asia	2004
H5g2.2.2	AY651335	VietNam/3046/2004	Human	H5	N1	VietNam	Asia	2004
H5g2.2.2	AY651336	VietNam/3062/2004	Human	H5	N1	VietNam	Asia	2004
H5g2.2.2	AY651341	Ck/VietNam/38/2004	Avian	H5	N1	VietNam	Asia	2004
H5g2.2.2	AY651342	Ck/VietNam/39/2004	Avian	H5	N1	VietNam	Asia	2004
H5g2.2.2	AY651344	Dk/VietNam/11/2004	Avian	H5	N1	VietNam	Asia	2004
H5g2.2.2	AY651351	Ck/HK/3169.1/2002	Avian	H5	N1	HongKong	Asia	2002
H5g2.2.2	CY028716	chicken/Vietnam/24/2004	Avian	H5	N1	VietNam	Asia	2004
H5g2.2.2	CY034198	chicken/Vietnam/18/2004	Avian	H5	N1	VietNam	Asia	2004
H5g2.2.2	CY035898	chicken/Vietnam/NCVD12/2005	Avian	H5	N1	VietNam	Asia	2005
H5g2.2.2	DQ083571	rollers/Bangkok/Thailand/CU-26/04	Avian	H5	N1	Thailand	Asia	2004
H5g2.2.2	DQ497679	chicken/Vietnam/20/2003	Avian	H5	N1	VietNam	Asia	2003
H5g2.2.2	DQ497680	mallard/Vietnam/21/2003	Avian	H5	N1	VietNam	Asia	2003
H5g2.2.2	DQ885610	Thailand/NKFE/2005	Human	H5	N1	Thailand	Asia	2005
H5g2.2.2	EF582405	chicken/Kamphaengphet/NIAH6-3-0015/2005	Avian	H5	N1	Thailand	Asia	2005
H5g2.2.2	DQ099760	chicken/VietNam/LD-080/2004	Avian	H5	N1	VietNam	Asia	2004
H5g2.2.2	DQ320940	Mallardduck/Vietnam/133/2004	Avian	H5	N1	VietNam	Asia	2004
H5g2.2.2	DQ497698	chicken/Vietnam/52/2004	Avian	H5	N1	VietNam	Asia	2004
H5g2.2.2	DQ497700	chicken/Vietnam/133/2004	Avian	H5	N1	VietNam	Asia	2004
H5g2.2.2	DQ497702	duck/Vietnam/148/2004	Avian	H5	N1	VietNam	Asia	2004
H5g2.2.2	DQ497710	chicken/Vietnam/53/2004	Avian	H5	N1	VietNam	Asia	2004
H5g2.2.2	DQ497714	chicken/Vietnam/134/2004	Avian	H5	N1	VietNam	Asia	2004
H5g2.2.2	DQ497715	quail/Vietnam/177/2004	Avian	H5	N1	VietNam	Asia	2004
H5g2.2.2	DQ497720	Vietnam/CL02/2004	Human	H5	N1	VietNam	Asia	2004
H5g2.2.2	DQ497723	Vietnam/CL26/2004	Human	H5	N1	VietNam	Asia	2004
H5g2.2.2	DQ497728	Vietnam/CL119/2005	Human	H5	N1	VietNam	Asia	2005
H5g2.2.2	DQ497719	Vietnam/CL01/2004	Human	H5	N1	VietNam	Asia	2004
H5g2.2.2	AB450551	chicken/Kalasin/NIAH317/2004	Avian	H5	N1	Thailand	Asia	2004
H5g2.2.2	AB450552	chicken/KohnKaen/NIAH330/2004	Avian	H5	N1	Thailand	Asia	2004
H5g2.2.2	AB450555	chicken/Nonthaburi/NIAH2879/2004	Avian	H5	N1	Thailand	Asia	2004
H5g2.2.2	AY575871	Gs/HK/739.2/02	Avian	H5	N1	HongKong	Asia	2002
H5g2.2.2	AY575872	Eg/HK/757.3/02	Avian	H5	N1	HongKong	Asia	2002
H5g2.2.2	AY651331	Dk/Thailand/71.1/2004	Avian	H5	N1	Thailand	Asia	2004
H5g2.2.2	AY651332	Gs/Thailand/79/2004	Avian	H5	N1	Thailand	Asia	2004
H5g2.2.2	AY590568	chicken/Nakorn-Patom/Thailand/CU-K2/2004	Avian	H5	N1	Thailand	Asia	2004
H5g2.2.2	AY627885	Thailand/5	Human	H5	N1	Thailand	Asia	2004
H5g2.2.2	AY676034	egret/HongKong/757.2/03	Avian	H5	N1	HongKong	Asia	2003
H5g2.2.2	AY779048	duck/Thailand/CU-2/2004	Avian	H5	N1	Thailand	Asia	2004
H5g2.2.2	AY651359	greyheron/HK/861.1/2002	Avian	H5	N1	HongKong	Asia	2002
H5g2.2.2	AY651326	Ck/Thailand/1/2004	Avian	H5	N1	Thailand	Asia	2004
H5g2.2.2	CY028968	duck/Hunan/1386/2003	Avian	H5	N1	China	Asia	2003
H5g2.2.2	CY028973	chicken/Yunnan/1215/2002	Avian	H5	N1	China	Asia	2002
H5g2.2.2	CY028953	pheasant/Shantou/40/2003	Avian	H5	N1	China	Asia	2003
H5g2.2.2	CY028974	duck/Yunnan/119/2003	Avian	H5	N1	China	Asia	2003
H5g2.2.2	CY028976	chicken/Yunnan/564/2003	Avian	H5	N1	China	Asia	2003
H5g2.2.2	CY028977	duck/Yunnan/662/2003	Avian	H5	N1	China	Asia	2003
H5g2.2.2	DQ083553	duck/Chonburi/Thailand/CU-5/04	Avian	H5	N1	Thailand	Asia	2004
H5g2.2.2	DQ083555	chicken/Chonburi/Thailand/CU-7/04	Avian	H5	N1	Thailand	Asia	2004
H5g2.2.2	DQ083557	chicken/Suphanburi/Thailand/CU-9/04	Avian	H5	N1	Thailand	Asia	2004
H5g2.2.2	DQ083559	chicken/Chachoengsao/Thailand/CU-11/04	Avian	H5	N1	Thailand	Asia	2004
H5g2.2.2	DQ083561	chicken/NakhonSawan/Thailand/CU-13/04	Avian	H5	N1	Thailand	Asia	2004
H5g2.2.2	DQ083568	chicken/Bangkok/Thailand/CU-20/04	Avian	H5	N1	Thailand	Asia	2004
H5g2.2.2	DQ497683	duck/Vietnam/48/2004	Avian	H5	N1	VietNam	Asia	2004
H5g2.2.2	DQ497687	chicken/Vietnam/32/2004	Avian	H5	N1	VietNam	Asia	2004
H5g2.2.2	EF206700	greenpeafowl/Thailand/VSMU-3-CBI/2005	Avian	H5	N1	Thailand	Asia	2005
H5g2.2.2	EF178517	goldenpheasant/Thailand/VSMU-21-SPB/2005	Avian	H5	N1	Thailand	Asia	2005
H5g2.2.2	EF178528	brown-headedgull/Thailand/VSMU-28-SPK/2005	Avian	H5	N1	Thailand	Asia	2005
H5g2.2.2	EF593102	chicken/Thailand/vsmu-3-BKK/2004	Avian	H5	N1	Thailand	Asia	2004
H5g2.2.2	DQ083577	chicken/NakhonSawan/Thailand/CU-39/04	Avian	H5	N1	Thailand	Asia	2004
H5g2.2.2	DQ083579	duck/NakhonPathom/Thailand/CU-71/04	Avian	H5	N1	Thailand	Asia	2004
H5g2.2.2	EU616835	duck/Thailand/CU-328/07	Avian	H5	N1	Thailand	Asia	2007
H5g2.2.2	EU268219	Thailand/16/2004	Human	H5	N1	Thailand	Asia	2004
H5g2.2.2	DQ320926	chicken/HongKong/3123.1/2002	Avian	H5	N1	HongKong	Asia	2002
H5g2.2.2	DQ320938	chicken/Vietnam/27/2003	Avian	H5	N1	VietNam	Asia	2003
H5g2.2.2	DQ497692	chicken/Vietnam/5/2003	Avian	H5	N1	VietNam	Asia	2003
H5g2.2.2	DQ989969	open-billedstork/Nakhonsawan/BBD0404F/2004	Avian	H5	N1	Thailand	Asia	2004
H5g2.2.2	EF541408	Thailand/16/2004	Human	H5	N1	Thailand	Asia	2004
H5g2.2.2	EF541414	chicken/Laos/7192/2004	Avian	H5	N1	Laos	Asia	2004
H5g2.2.2	FJ868014	chicken/Thailand/ST-351/2008	Avian	H5	N1	Thailand	Asia	2008
H5g2.2.2	AY555150	Thailand/1	Human	H5	N1	Thailand	Asia	2004
H5g2.2.2	DQ497682	chicken/Vietnam/30/2003	Avian	H5	N1	VietNam	Asia	2003
H5g2.2.2	DQ083558	chicken/Chachoengsao/Thailand/CU-10/04	Avian	H5	N1	Thailand	Asia	2004
H5g2.2.2	DQ083565	chicken/Saraburi/Thailand/CU-17/04	Avian	H5	N1	Thailand	Asia	2004
H5g2.2.2	FJ265576	chicken/Thailand/Kamphaengphet/NIAH6-3-0010/2005	Avian	H5	N1	Thailand	Asia	2005
H5g2.2.2	AY553802	littlegrebe/Thailand/Phichit-01/2004	Avian	H5	N1	Thailand	Asia	2004
H5g2.2.2	AY651328	Ck/Thailand/9.1/2004	Avian	H5	N1	Thailand	Asia	2004
H5g2.2.2	AY779050	chicken/Thailand/CU-21/2004	Avian	H5	N1	Thailand	Asia	2004
H5g2.2.2	DQ083550	chicken/Suphanburi/Thailand/CU-1/04	Avian	H5	N1	Thailand	Asia	2004
H5g2.2.2	DQ083552	crow/Bangkok/Thailand/CU-4/04	Avian	H5	N1	Thailand	Asia	2004
H5g2.2.2	DQ083560	chicken/NakhonSawan/Thailand/CU-12/04	Avian	H5	N1	Thailand	Asia	2004
H5g2.2.2	DQ083562	chicken/NakhonPathom/Thailand/CU-14/04	Avian	H5	N1	Thailand	Asia	2004
H5g2.2.2	DQ083567	Ostrich/SamutPrakan/Thailand/CU-19/04	Avian	H5	N1	Thailand	Asia	2004
H5g2.2.2	DQ083574	ostrich/SamutPrakan/Thailand/CU-31/04	Avian	H5	N1	Thailand	Asia	2004
H5g2.2.2	DQ236077	cat/Thailand/KU-02/04	Cat	H5	N1	Thailand	Asia	2004
H5g2.2.2	EF467802	chicken/Thailand/2/04	Avian	H5	N1	Thailand	Asia	2004
H5g2.2.2	EF568922	chicken/Suphanburi/137/2005	Avian	H5	N1	Thailand	Asia	2005
H5g2.2.2	DQ083581	duck/Saraburi/Thailand/CU-74/04	Avian	H5	N1	Thailand	Asia	2004
H5g2.2.2	EF541415	chicken/Laos/44/2004	Avian	H5	N1	Laos	Asia	2004
H5g2.2.2	EF541413	chicken/Laos/7191/2004	Avian	H5	N1	Laos	Asia	2004
H5g2.2.2	DQ360835	Thailand/676/2005	Human	H5	N1	Thailand	Asia	2005
H5g2.2.2	DQ372591	Thailand/NK165/2005	Human	H5	N1	Thailand	Asia	2005
H5g2.2.2	AB450563	duck/Angthong/NIAH8246/2004	Avian	H5	N1	Thailand	Asia	2004
H5g2.2.2	AB450567	chicken/Kalasin/NIAH3776/2005	Avian	H5	N1	Thailand	Asia	2005
H5g2.2.2	DQ083578	chicken/Ratchaburi/Thailand/CU-68/04	Avian	H5	N1	Thailand	Asia	2004
H5g2.2.2	AB450561	chicken/Suphanburi/NIAH7540/2004	Avian	H5	N1	Thailand	Asia	2004
H5g2.2.2	AB450576	treesparrow/Thailand/VSMU-14-KRI/2005	Avian	H5	N1	Thailand	Asia	2005
H5g2.2.2	DQ334768	quail/Thailand/NakhonPathom/QA-161/2005	Avian	H5	N1	Thailand	Asia	2005
H5g2.2.2	EF206698	pigeon/Thailand/VSMU-25-BKK/2005	Avian	H5	N1	Thailand	Asia	2005
H5g2.2.2	AB450565	chicken/Suphanburi/NIAH108192/2005	Avian	H5	N1	Thailand	Asia	2005
H5g2.2.2	DQ334760	chicken/Thailand/Kanchanaburi/CK-160/2005	Avian	H5	N1	Thailand	Asia	2005
H5g2.2.2	DQ334776	chicken/Thailand/Nontaburi/CK-162/2005	Avian	H5	N1	Thailand	Asia	2005
H5g2.2.2	CY030431	duck/Vietnam/NCVD-26/2007	Avian	H5	N1	VietNam	Asia	2007
H5g2.2.2	FJ225472	Cambodia/R0405050/2007	Human	H5	N1	Cambodia	Asia	2007
H5g2.2.2	AY741219	treesparrow/Henan/3/2004	Avian	H5	N1	China	Asia	2004
H5g2.2.2	DQ497708	duck/Vietnam/283/2005	Avian	H5	N1	VietNam	Asia	2005
H5g2.2.2	CY030287	duck/Vietnam/NCVD-7/2007	Avian	H5	N1	VietNam	Asia	2007
H5g2.2.2	CY030239	duck/Vietnam/NCVD-1/2007	Avian	H5	N1	VietNam	Asia	2007
H5g2.2.2	EF456802	VietNam/JPHN30321/2005	Human	H5	N1	VietNam	Asia	2005
H5g2.2.2	DQ497725	Vietnam/CL100/2004	Human	H5	N1	VietNam	Asia	2004
H5g2.2.2	EU124171	Duck/Vietnam/SocTrang680G/2005	Avian	H5	N1	VietNam	Asia	2005
H5g2.2.2	AY741213	blackbird/Hunan/1/2004	Avian	H5	N1	China	Asia	2004
H5g2.2.2	CY029559	duck/Vietnam/1/2007	Avian	H5	N1	VietNam	Asia	2007
H5g2.2.2	EU124166	Duck/Vietnam/TienGiang409/2006	Avian	H5	N1	VietNam	Asia	2006
H5g2.2.2	DQ497729	Vietnam/CL2009/2005	Human	H5	N1	VietNam	Asia	2005
H5g2.2.2	CY036719	chicken/Vietnam/NCVD11/2005	Avian	H5	N1	VietNam	Asia	2005
H5g2.2.2	DQ497727	Vietnam/CL115/2005	Human	H5	N1	VietNam	Asia	2005
H5g2.2.2	DQ997094	duck/Hubei/wg/2002	Avian	H5	N1	China	Asia	2002
H5g2.2.2	EF541409	chicken/VietNam/1/2004	Avian	H5	N1	VietNam	Asia	2004
H5g2.2.2	DQ497672	duck/Vietnam/17/2003	Avian	H5	N1	VietNam	Asia	2003
H5g2.2.2	CY030263	Muscovyduck/Vietnam/NCVD-4/2007	Avian	H5	N1	VietNam	Asia	2007
H5g2.2.2	EU124167	MuscovyDuck/Vietnam/BenTre342/2006	Avian	H5	N1	VietNam	Asia	2006
H5g2.2.2	CY029615	chicken/Vietnam/15/2007	Avian	H5	N1	VietNam	Asia	2007
H5g2.2.2	CY030319	Muscovyduck/Vietnam/NCVD-11/2007	Avian	H5	N1	VietNam	Asia	2007
H5g2.2.2	CY030279	duck/Vietnam/NCVD-6/2007	Avian	H5	N1	VietNam	Asia	2007
H5g2.2.2	CY030295	duck/Vietnam/NCVD-8/2007	Avian	H5	N1	VietNam	Asia	2007
H5g2.2.2	CY029575	Muscovyduck/Vietnam/4/2007	Avian	H5	N1	VietNam	Asia	2007
H5g2.2.2	AY741221	treesparrow/Henan/4/2004	Avian	H5	N1	China	Asia	2004
H5g2.2.2	CY029623	duck/Vietnam/18/2007	Avian	H5	N1	VietNam	Asia	2007
H5g2.2.2	CY030351	duck/Vietnam/NCVD-16/2007	Avian	H5	N1	VietNam	Asia	2007
H5g2.2.2	CY029647	duck/Vietnam/34/2007	Avian	H5	N1	VietNam	Asia	2007
H5g2.2.2	CY029639	Muscovyduck/Vietnam/33/2007	Avian	H5	N1	VietNam	Asia	2007
H5g2.2.2	CY030311	chicken/Vietnam/NCVD-10/2007	Avian	H5	N1	VietNam	Asia	2007
H5g2.2.2	CY030303	duck/Vietnam/NCVD-9/2007	Avian	H5	N1	VietNam	Asia	2007
H5g2.2.2	CY029591	duck/Vietnam/6/2007	Avian	H5	N1	VietNam	Asia	2007
H5g2.2.2	CY029607	duck/Vietnam/8/2007	Avian	H5	N1	VietNam	Asia	2007
H5g2.2.2	CY029583	duck/Vietnam/5/2007	Avian	H5	N1	VietNam	Asia	2007
H5g2.2.2	DQ885614	Thailand/RPFE/2005	Human	H5	N1	Thailand	Asia	2005
H5g2.2.2	EF456795	VietNam/JP178/2004	Human	H5	N1	VietNam	Asia	2004
H5g2.2.2	AY651340	Ck/VietNam/37/2004	Avian	H5	N1	VietNam	Asia	2004
H5g2.2.2	CY033169	chicken/Vietnam/830/2004	Avian	H5	N1	VietNam	Asia	2004
H5g2.2.2	DQ099758	chicken/VietNam/TG-023/2004	Avian	H5	N1	VietNam	Asia	2004
H5g2.2.2	DQ497722	Vietnam/CL20/2004	Human	H5	N1	VietNam	Asia	2004
H5g2.2.2	DQ099755	chicken/VietNam/TN-025/2004	Avian	H5	N1	VietNam	Asia	2004
H5g2.2.2	AY651338	Ck/VietNam/35/2004	Avian	H5	N1	VietNam	Asia	2004
H5g2.2.2	CY028700	chicken/Vietnam/10/2004	Avian	H5	N1	VietNam	Asia	2004
H5g2.2.2	DQ099756	duck/VietNam/TG-007	Avian	H5	N1	VietNam	Asia	2004
H5g2.2.2	AY651339	Ck/VietNam/36/2004	Avian	H5	N1	VietNam	Asia	2004
H5g2.2.2	AY818137	quail/Vietnam/36/04	Avian	H5	N1	VietNam	Asia	2004
H5g2.2.2	CY029937	chicken/Vietnam/15/2004	Avian	H5	N1	VietNam	Asia	2004
H5g2.2.2	DQ099757	quail/VietNam/TG-007B/2004	Avian	H5	N1	VietNam	Asia	2004
H5g2.2.2	DQ497695	chicken/Vietnam/135/2004	Avian	H5	N1	VietNam	Asia	2004
H5g2.2.2	DQ497696	chicken/Vietnam/149/2004	Avian	H5	N1	VietNam	Asia	2004
H5g2.2.2	DQ320937	chicken/Vietnam/DT171/2004	Avian	H5	N1	VietNam	Asia	2004
H5g2.2.2	DQ099759	chicken/VietNam/DT-171/2004	Avian	H5	N1	VietNam	Asia	2004
H5g2.2.2	DQ497724	Vietnam/CL36/2004	Human	H5	N1	VietNam	Asia	2004
H5g2.2.2	EF646271	goose/Leuwiliang/IPB4-RS/2006	Avian	H5	N1	Indonesia	Asia	2006
H5g2.2.2	EF646272	duck/Leuwiliang/IPB3-RS/2006	Avian	H5	N1	Indonesia	Asia	2006
H5g2.2.2	EF646274	heron/Cicurug/IPB25-RS/2006	Avian	H5	N1	Indonesia	Asia	2006
H5g2.2.2	EF541417	Thailand/Chaiyaphum/622/2004	Human	H5	N1	Thailand	Asia	2004
H5g2.2.2	EU118132	chicken/Vietnam/G04/2004	Avian	H5	N1	VietNam	Asia	2004
H5g2.2.2	EF541406	chicken/VietNam/Ncvd31/2004	Avian	H5	N1	VietNam	Asia	2004
H5g2.2.2	EF582400	chicken/Nakornsawan/NIAH6-3-0009/2005	Avian	H5	N1	Thailand	Asia	2005
[truncated: 2,022 more rows]

## Sheet: H6
H6g1.1	CY014607	sanderling/Delaware/1258/1986	Avian	H6	N6	USA	NorthAmerica	1986
[truncated: 463 more rows]

[truncated: 10 more sheets: H7, H8, H9, H10, H11, H12, H13, H14, H15, H16]
